# Supplementary material
Source: publisher figshare collection journal article supplement (https://acs.figshare.com/ndownloader/files/12776129)
Supplement: Supplementary file 1 [file 12776129]

## Sheet: ZVP-31-putative-substrates
Acc number	Uniprot ID	Intensity	P4'-P1	Peptide sequence	Start site	Protein name
P10809	CH60_HUMAN	232899	VGRK	GVITVKDGK	197	60 kDa heat shock protein, mitochondrial
P10809	CH60_HUMAN	495208	TVAK	SIDLKDKYK	83	60 kDa heat shock protein, mitochondrial
O76031	CLPX_HUMAN	149484	KGRR	AAAAADLANR	453	ATP-dependent Clp protease ATP-binding subunit clpX-like, mitochondrial
Q9BWD1	THIC_HUMAN	301604	STRK	GLIEVKTDEFPR	212	Acetyl-CoA acetyltransferase, cytosolic
P63261	ACTG_HUMAN	450391	QSKR	GILTLK	63	Actin, cytoplasmic 2
P30520	PURA2_HUMAN	123466	TTKK	GIGPVYSSK	165	Adenylosuccinate synthetase isozyme 2
P55196	AFAD_HUMAN	153430	LAKR	SVDGGLMVKGPR	512	Afadin
Q676U5	A16L1_HUMAN	335955	FGRR	SVSSFPVPQDNVDTHPGSGKEVR	287	Autophagy-related protein 16-1
O60271	JIP4_HUMAN	483849	VKKR	SSTLSQLPGDKSK	593	C-Jun-amino-terminal kinase-interacting protein 4
P45973	CBX5_HUMAN	128700	NKRK	SNFSNSADDIK	92	Chromobox protein homolog 5
P38432	COIL_HUMAN	227642	AKKR	AFQLEEGEETEPDCKYSK	113	Coilin
O75131	CPNE3_HUMAN	2640000	QKKK	SYKNSGVISVK	260	Copine-3
P33316	DUT_HUMAN	1220000	PSKR	ARPAEVGGMQLR	104	Deoxyuridine 5'-triphosphate nucleotidohydrolase, mitochondrial
P27695	APEX1_HUMAN	126577	RGKK	GAVAEDGDELRTEPEAK	8	DNA-(apurinic or apyrimidinic site) lyase
Q04637	IF4G1_HUMAN	1070000	DKRR	GGPPGPPISR	1033	Eukaryotic translation initiation factor 4 gamma 1
O14654	IRS4_HUMAN	69943	LKKR	SYFGKLTQSK	614	Insulin receptor substrate 4
P80297	MT1X_HUMAN	975059	SCKK	SCCSCCPVGCAK	32	Metallothionein-1X
P02795	MT2_HUMAN	975059	SCKK	SCCSCCPVGCAK	32	Metallothionein-2
Q9NQG6	MID51_HUMAN	84053	SGKR	SWEEPNWMGSPR	70	Mitochondrial dynamics protein MID51
O43318	M3K7_HUMAN	128748	PRRR	SIQDLTVTGTEPGQVSSR	439	Mitogen-activated protein kinase kinase kinase 7
P17844	DDX5_HUMAN	698254	AGKR	GGFNTFR	503	Probable ATP-dependent RNA helicase DDX5
P07602	SAP_HUMAN	341476	PTVK	SLPCDICK	60	Prosaposin
Q99497	PARK7_HUMAN	1820000	ASKR	ALVILAK	6	Protein DJ-1
Q9H098	F107B_HUMAN	69215	NQKR	GLAPQNKPELQK	44	Protein FAM107B
Q96PZ0	PUS7_HUMAN	154501	SLKR	GALVVEDNDSGVPVEETKK	14	Pseudouridylate synthase 7 homolog
Q9BWH6	RPAP1_HUMAN	242712	SGKR	SIFAQEIAAR	150	RNA polymerase II-associated protein 1
Q01844	EWS_HUMAN	153814	GGRR	GGPGGPPGPLMEQMGGR	616	RNA-binding protein EWS
Q9UHD8	SEPT9_HUMAN	73081	ALKR	SFEVEEVETPNSTPPRR	30	Septin-9
Q5H9R7	PP6R3_HUMAN	77127	AEAK	CAAPRPPSSSPEQR	844	Serine/threonine-protein phosphatase 6 regulatory subunit 3
Q9UPQ9	TNR6B_HUMAN	45243	SGRR	SYRPTHPDCQAVLQTLLSR	592	Trinucleotide repeat-containing gene 6B protein
P68363	TBA1B_HUMAN	464403	KTKR	SIQFVDWCPTGFK	340	Tubulin alpha-1B chain
Q96H20	SNF8_HUMAN	504044	MHRR	GVGAGAIAK	5	Vacuolar-sorting protein SNF8

## Sheet: ZVP-light-report.txt
Search Name:	Q20170801-07-Zika-2017/results1
Search Name:	Q20170801-07-Zika-2017/results1
Search Name:	Q20170801-09-Zika-2017/results1
			Q20170801-07-Zika-2017/results1
	Uniq Pep	Acc #	UniProt ID	Num Unique	% Cov	Best Disc Score	Best Expect Val	m/z	z	Intensity	ppm	Prev AA	DB Peptide	Constant Mods	Variable Mods	Fraction	RT	Start	Expect	# in DB	Protein Length	Protein MW	Species	Protein Name
[1]		P63261	ACTG_HUMAN	47	46.7	11.44	1.4e-20	836.396	3	217061	-0.93	GRPR	HQGVMVGMGQKDSYVGDEAQSKR			Q20170801-09	97.4539	40	1.4e-20	6	375	41793.2	HUMAN	Actin, cytoplasmic 2
[1]		P63261	ACTG_HUMAN	47	46.7	11.44	1.4e-20	939.434	2	243919	-0.97	-	MEEEIAALVIDNGSGMCK	Carbamidomethyl@17	Met-loss+Acetyl@1	Q20170801-09	205.603	1	3.8e-20	1	375	41793.2	HUMAN	Actin, cytoplasmic 2
[1]		P63261	ACTG_HUMAN	47	46.7	11.44	1.4e-20	784.363	3	375072	-0.06	GRPR	HQGVMVGMGQKDSYVGDEAQSK			Q20170801-07	108.522	40	1.8e-19	6	375	41793.2	HUMAN	Actin, cytoplasmic 2
[1]		P63261	ACTG_HUMAN	47	46.7	11.44	1.4e-20	548.938	3	484488	0.68	WISK	QEYDESGPSIVHRK			Q20170801-09	66.559	360	4.6e-16	7	375	41793.2	HUMAN	Actin, cytoplasmic 2
[1]		P63261	ACTG_HUMAN	47	46.7	11.44	1.4e-20	543.263	3	462538	1.6	WISK	QEYDESGPSIVHRK		Gln->pyro-Glu@1	Q20170801-09	92.4347	360	4.9e-16	7	375	41793.2	HUMAN	Actin, cytoplasmic 2
[1]		P63261	ACTG_HUMAN	47	46.7	11.44	1.4e-20	895.95	2	2030000	0.11	SLEK	SYELPDGQVITIGNER			Q20170801-07	179.892	239	5.9e-16	10	375	41793.2	HUMAN	Actin, cytoplasmic 2
[1]		P63261	ACTG_HUMAN	47	46.7	11.44	1.4e-20	631.548	4	285332	0.11	GRPR	HQGVMVGMGQKDSYVGDEAQSKR		Oxidation@5'25	Q20170801-09	85.5025	40	4.8e-14	6	375	41793.2	HUMAN	Actin, cytoplasmic 2
[1]		P63261	ACTG_HUMAN	47	46.7	11.44	1.4e-20	675.331	2	206899	0.32	EEIA	ALVIDNGSGMCK	Carbamidomethyl@11	Abu@N-term	Q20170801-07	120.24	7	6.7e-14	1	375	41793.2	HUMAN	Actin, cytoplasmic 2
[1]		P63261	ACTG_HUMAN	47	46.7	11.44	1.4e-20	631.548	4	249653	-0.044	GRPR	HQGVMVGMGQKDSYVGDEAQSKR		Oxidation@8'13	Q20170801-09	76.9129	40	1.9e-13	6	375	41793.2	HUMAN	Actin, cytoplasmic 2
[1]		P63261	ACTG_HUMAN	47	46.7	11.44	1.4e-20	774.909	2	577627	-1.1	IADR	MQKEITALAPSTMK			Q20170801-09	120.596	313	3.5e-13	6	375	41793.2	HUMAN	Actin, cytoplasmic 2
[1]		P63261	ACTG_HUMAN	47	46.7	11.44	1.4e-20	586.289	2	3300000	-0.36	GRPR	HQGVMVGMGQK			Q20170801-09	59.4777	40	4.8e-13	7	375	41793.2	HUMAN	Actin, cytoplasmic 2
[1]		P63261	ACTG_HUMAN	47	46.7	11.44	1.4e-20	645.628	3	238292	-1.1	WISK	QEYDESGPSIVHRKCF	Carbamidomethyl@15	Gln->pyro-Glu@1	Q20170801-09	131.746	360	5.4e-13	6	375	41793.2	HUMAN	Actin, cytoplasmic 2
[1]		P63261	ACTG_HUMAN	47	46.7	11.44	1.4e-20	750.342	2	174341	0.7	WISK	QEYDESGPSIVHR		Gln->pyro-Glu@1	Q20170801-09	115.826	360	2.7e-12	7	375	41793.2	HUMAN	Actin, cytoplasmic 2
[1]		P63261	ACTG_HUMAN	47	46.7	11.44	1.4e-20	594.287	2	494504	-0.064	GRPR	HQGVMVGMGQK		Oxidation@5'39	Q20170801-09	42.3906	40	4.9e-12	7	375	41793.2	HUMAN	Actin, cytoplasmic 2
[1]		P63261	ACTG_HUMAN	47	46.7	11.44	1.4e-20	438.968	4	338404	-1.3	MVGM	GQKDSYVGDEAQSKR		Abu@N-term	Q20170801-09	33.7301	48	2.8e-11	6	375	41793.2	HUMAN	Actin, cytoplasmic 2
[1]		P63261	ACTG_HUMAN	47	46.7	11.44	1.4e-20	506.24	3	1320000	1.1	WISK	QEYDESGPSIVHR			Q20170801-09	86.0564	360	3.1e-11	7	375	41793.2	HUMAN	Actin, cytoplasmic 2
[1]		P63261	ACTG_HUMAN	47	46.7	11.44	1.4e-20	548.251	3	183996	-0.17	VMVG	MGQKDSYVGDEAQSK			Q20170801-07	50.5495	47	4e-11	6	375	41793.2	HUMAN	Actin, cytoplasmic 2
[1]		P63261	ACTG_HUMAN	47	46.7	11.44	1.4e-20	442.22	3	268665	-1.9	GQKD	SYVGDEAQSKR		Abu@N-term	Q20170801-07	38.8497	52	1.2e-10	6	375	41793.2	HUMAN	Actin, cytoplasmic 2
[1]		P63261	ACTG_HUMAN	47	46.7	11.44	1.4e-20	781.726	3	334481	-1.3	VDIR	KDLYANTVLSGGTTMYPGIADR			Q20170801-09	174.987	291	1.6e-10	2	375	41793.2	HUMAN	Actin, cytoplasmic 2
[1]		P63261	ACTG_HUMAN	47	46.7	11.44	1.4e-20	450.465	4	757288	0.18	VMVG	MGQKDSYVGDEAQSKR			Q20170801-09	44.5142	47	1.7e-10	6	375	41793.2	HUMAN	Actin, cytoplasmic 2
[1]		P63261	ACTG_HUMAN	47	46.7	11.44	1.4e-20	400.24	3	2000000	-0.27	DAPR	AVFPSIVGRPR			Q20170801-09	131.938	29	2.2e-10	10	375	41793.2	HUMAN	Actin, cytoplasmic 2
[1]		P63261	ACTG_HUMAN	47	46.7	11.44	1.4e-20	639.812	2	238605	-0.74	EIAA	LVIDNGSGMCK	Carbamidomethyl@10	Abu@N-term	Q20170801-09	107.511	8	2.2e-10	6	375	41793.2	HUMAN	Actin, cytoplasmic 2
[1]		P63261	ACTG_HUMAN	47	46.7	11.44	1.4e-20	505.921	3	1400000	0.58	DMEK	IWHHTFYNELR			Q20170801-09	128.855	85	2.7e-10	9	375	41793.2	HUMAN	Actin, cytoplasmic 2
[1]		P63261	ACTG_HUMAN	47	46.7	11.44	1.4e-20	488.73	4	257492	1.3	WISK	QEYDESGPSIVHRKCF	Carbamidomethyl@15		Q20170801-09	109.373	360	3.6e-10	6	375	41793.2	HUMAN	Actin, cytoplasmic 2
[1]		P63261	ACTG_HUMAN	47	46.7	11.44	1.4e-20	592.523	4	407895	0.48	GRPR	HQGVMVGMGQKDSYVGDEAQSK		Oxidation@5'17	Q20170801-09	92.9373	40	3.6e-10	6	375	41793.2	HUMAN	Actin, cytoplasmic 2
[1]		P63261	ACTG_HUMAN	47	46.7	11.44	1.4e-20	663.311	2	260761	-0.25	NTVL	SGGTTMYPGIADR			Q20170801-09	110.066	300	2.9e-09	6	375	41793.2	HUMAN	Actin, cytoplasmic 2
[1]		P63261	ACTG_HUMAN	47	46.7	11.44	1.4e-20	632.805	2	63571	-0.37	EEIA	ALVIDNGSGMCK	Carbamidomethyl@11		Q20170801-09	103.237	7	5.2e-09	1	375	41793.2	HUMAN	Actin, cytoplasmic 2
[1]		P63261	ACTG_HUMAN	47	46.7	11.44	1.4e-20	652.025	3	685189	-1.2	NELR	VAPEEHPVLLTEAPLNPK			Q20170801-07	156.957	96	1.8e-08	2	375	41793.2	HUMAN	Actin, cytoplasmic 2
[1]		P63261	ACTG_HUMAN	47	46.7	11.44	1.4e-20	594.285	2	112959	-2.1	GRPR	HQGVMVGMGQK		Oxidation@8'42	Q20170801-09	28.4595	40	3.1e-08	7	375	41793.2	HUMAN	Actin, cytoplasmic 2
[1]		P63261	ACTG_HUMAN	47	46.7	11.44	1.4e-20	452.21	3	101386	-5.4	MGQK	DSYVGDEAQSKR			Q20170801-07	40.7085	51	3.2e-08	6	375	41793.2	HUMAN	Actin, cytoplasmic 2
[1]		P63261	ACTG_HUMAN	47	46.7	11.44	1.4e-20	592.523	4	149444	0.29	GRPR	HQGVMVGMGQKDSYVGDEAQSK		Oxidation@8'15	Q20170801-07	86.4968	40	5.8e-08	6	375	41793.2	HUMAN	Actin, cytoplasmic 2
[1]		P63261	ACTG_HUMAN	47	46.7	11.44	1.4e-20	819.912	2	274000	0.45	LYAN	TVLSGGTTMYPGIADR			Q20170801-09	156.108	297	1.5e-07	2	375	41793.2	HUMAN	Actin, cytoplasmic 2
[1]		P63261	ACTG_HUMAN	47	46.7	11.44	1.4e-20	488.728	2	780491	-0.35	GMCK	AGFAGDDAPR			Q20170801-09	57.0404	19	1.6e-07	10	375	41793.2	HUMAN	Actin, cytoplasmic 2
[1]		P63261	ACTG_HUMAN	47	46.7	11.44	1.4e-20	491.783	2	393532	2.4	HPVL	LTEAPLNPK			Q20170801-09	75.0759	105	2.8e-07	11	375	41793.2	HUMAN	Actin, cytoplasmic 2
[1]		P63261	ACTG_HUMAN	47	46.7	11.44	1.4e-20	531.255	2	42465	2.2	GMCK	AGFAGDDAPR		Abu@N-term	Q20170801-09	69.2365	19	8.7e-07	10	375	41793.2	HUMAN	Actin, cytoplasmic 2
[1]		P63261	ACTG_HUMAN	47	46.7	11.44	1.4e-20	597.335	3	685417	0.17	IADR	MQKEITALAPSTMKIK			Q20170801-09	134.05	313	1.1e-06	6	375	41793.2	HUMAN	Actin, cytoplasmic 2
[1]		P63261	ACTG_HUMAN	47	46.7	11.44	1.4e-20	581.312	2	368295	-1.8	RMQK	EITALAPSTMK			Q20170801-07	122.937	316	1.2e-06	6	375	41793.2	HUMAN	Actin, cytoplasmic 2
[1]		P63261	ACTG_HUMAN	47	46.7	11.44	1.4e-20	495.735	2	442568	-0.72	MCKA	GFAGDDAPR		Abu@N-term	Q20170801-09	66.2363	20	1.5e-06	10	375	41793.2	HUMAN	Actin, cytoplasmic 2
[1]		P63261	ACTG_HUMAN	47	46.7	11.44	1.4e-20	518.829	2	475133	-0.41	STMK	IKIIAPPER			Q20170801-09	98.704	327	5.3e-06	7	375	41793.2	HUMAN	Actin, cytoplasmic 2
[1]		P63261	ACTG_HUMAN	47	46.7	11.44	1.4e-20	512.25	2	266954	0.59	SGGT	TMYPGIADR			Q20170801-09	102.062	304	1.9e-05	7	375	41793.2	HUMAN	Actin, cytoplasmic 2
[1]		P63261	ACTG_HUMAN	47	46.7	11.44	1.4e-20	388.92	3	1550000	-0.62	STMK	IKIIAPPERK			Q20170801-09	77.7864	327	5.6e-05	7	375	41793.2	HUMAN	Actin, cytoplasmic 2
[1]		P63261	ACTG_HUMAN	47	46.7	11.44	1.4e-20	406.2	3	288909	0.17	EKIW	HHTFYNELR			Q20170801-09	83.2939	87	9.8e-05	9	375	41793.2	HUMAN	Actin, cytoplasmic 2
[1]		P63261	ACTG_HUMAN	47	46.7	11.44	1.4e-20	522.274	3	704764	0.077	IADR	MQKEITALAPSTMK		Oxidation@1'85	Q20170801-09	107.203	313	0.00011	6	375	41793.2	HUMAN	Actin, cytoplasmic 2
[1]		P63261	ACTG_HUMAN	47	46.7	11.44	1.4e-20	398.239	2	369092	-1.9	MKIK	IIAPPER			Q20170801-09	64.4785	329	0.00011	7	375	41793.2	HUMAN	Actin, cytoplasmic 2
[1]		P63261	ACTG_HUMAN	47	46.7	11.44	1.4e-20	468.271	3	228564	-0.11	RMQK	EITALAPSTMKIK			Q20170801-07	138.691	316	0.00018	6	375	41793.2	HUMAN	Actin, cytoplasmic 2
[1]		P63261	ACTG_HUMAN	47	46.7	11.44	1.4e-20	462.287	2	790617	-0.31	MKIK	IIAPPERK			Q20170801-09	42.7939	329	0.00035	7	375	41793.2	HUMAN	Actin, cytoplasmic 2
[1]		P63261	ACTG_HUMAN	47	46.7	11.44	1.4e-20	365.247	2	450391	-1.2	QSKR	GILTLK		Abu@N-term	Q20170801-09	120.408	63	0.0055	17	375	41793.2	HUMAN	Actin, cytoplasmic 2
[1-1]	3	P60709	ACTB_HUMAN	46	46.7	11.91	1.9e-21	911.404	2	188719	0.65	-	MDDDIAALVVDNGSGMCK	Carbamidomethyl@17	Met-loss+Acetyl@1	Q20170801-09	195.828	1	1.9e-21	1	375	41737.1	HUMAN	Actin, cytoplasmic 1
[1-1]	3	P60709	ACTB_HUMAN	46	46.7	11.91	1.9e-21	836.396	3	217061	-0.93	GRPR	HQGVMVGMGQKDSYVGDEAQSKR			Q20170801-09	97.4539	40	1.4e-20	6	375	41737.1	HUMAN	Actin, cytoplasmic 1
[1-1]	3	P60709	ACTB_HUMAN	46	46.7	11.91	1.9e-21	784.363	3	375072	-0.06	GRPR	HQGVMVGMGQKDSYVGDEAQSK			Q20170801-07	108.522	40	1.8e-19	6	375	41737.1	HUMAN	Actin, cytoplasmic 1
[1-1]	3	P60709	ACTB_HUMAN	46	46.7	11.91	1.9e-21	632.804	2	202478	-0.69	DIAA	LVVDNGSGMCK	Carbamidomethyl@10	Abu@N-term	Q20170801-07	92.6506	8	1.4e-17	2	375	41737.1	HUMAN	Actin, cytoplasmic 1
[1-1]	3	P60709	ACTB_HUMAN	46	46.7	11.91	1.9e-21	548.938	3	484488	0.68	WISK	QEYDESGPSIVHRK			Q20170801-09	66.559	360	4.6e-16	7	375	41737.1	HUMAN	Actin, cytoplasmic 1
[1-1]	3	P60709	ACTB_HUMAN	46	46.7	11.91	1.9e-21	543.263	3	462538	1.6	WISK	QEYDESGPSIVHRK		Gln->pyro-Glu@1	Q20170801-09	92.4347	360	4.9e-16	7	375	41737.1	HUMAN	Actin, cytoplasmic 1
[1-1]	3	P60709	ACTB_HUMAN	46	46.7	11.91	1.9e-21	895.95	2	2030000	0.11	SLEK	SYELPDGQVITIGNER			Q20170801-07	179.892	239	5.9e-16	10	375	41737.1	HUMAN	Actin, cytoplasmic 1
[1-1]	3	P60709	ACTB_HUMAN	46	46.7	11.91	1.9e-21	631.548	4	285332	0.11	GRPR	HQGVMVGMGQKDSYVGDEAQSKR		Oxidation@5'25	Q20170801-09	85.5025	40	4.8e-14	6	375	41737.1	HUMAN	Actin, cytoplasmic 1
[1-1]	3	P60709	ACTB_HUMAN	46	46.7	11.91	1.9e-21	631.548	4	249653	-0.044	GRPR	HQGVMVGMGQKDSYVGDEAQSKR		Oxidation@8'13	Q20170801-09	76.9129	40	1.9e-13	6	375	41737.1	HUMAN	Actin, cytoplasmic 1
[1-1]	3	P60709	ACTB_HUMAN	46	46.7	11.91	1.9e-21	774.909	2	577627	-1.1	IADR	MQKEITALAPSTMK			Q20170801-09	120.596	313	3.5e-13	6	375	41737.1	HUMAN	Actin, cytoplasmic 1
[1-1]	3	P60709	ACTB_HUMAN	46	46.7	11.91	1.9e-21	586.289	2	3300000	-0.36	GRPR	HQGVMVGMGQK			Q20170801-09	59.4777	40	4.8e-13	7	375	41737.1	HUMAN	Actin, cytoplasmic 1
[1-1]	3	P60709	ACTB_HUMAN	46	46.7	11.91	1.9e-21	645.628	3	238292	-1.1	WISK	QEYDESGPSIVHRKCF	Carbamidomethyl@15	Gln->pyro-Glu@1	Q20170801-09	131.746	360	5.4e-13	6	375	41737.1	HUMAN	Actin, cytoplasmic 1
[1-1]	3	P60709	ACTB_HUMAN	46	46.7	11.91	1.9e-21	750.342	2	174341	0.7	WISK	QEYDESGPSIVHR		Gln->pyro-Glu@1	Q20170801-09	115.826	360	2.7e-12	7	375	41737.1	HUMAN	Actin, cytoplasmic 1
[1-1]	3	P60709	ACTB_HUMAN	46	46.7	11.91	1.9e-21	594.287	2	494504	-0.064	GRPR	HQGVMVGMGQK		Oxidation@5'39	Q20170801-09	42.3906	40	4.9e-12	7	375	41737.1	HUMAN	Actin, cytoplasmic 1
[1-1]	3	P60709	ACTB_HUMAN	46	46.7	11.91	1.9e-21	438.968	4	338404	-1.3	MVGM	GQKDSYVGDEAQSKR		Abu@N-term	Q20170801-09	33.7301	48	2.8e-11	6	375	41737.1	HUMAN	Actin, cytoplasmic 1
[1-1]	3	P60709	ACTB_HUMAN	46	46.7	11.91	1.9e-21	506.24	3	1320000	1.1	WISK	QEYDESGPSIVHR			Q20170801-09	86.0564	360	3.1e-11	7	375	41737.1	HUMAN	Actin, cytoplasmic 1
[1-1]	3	P60709	ACTB_HUMAN	46	46.7	11.91	1.9e-21	927.081	3	73241	-0.7	-	MDDDIAALVVDNGSGMCKAGFAGDDAPR	Carbamidomethyl@17	Met-loss+Acetyl@1	Q20170801-09	195.931	1	3.7e-11	1	375	41737.1	HUMAN	Actin, cytoplasmic 1
[1-1]	3	P60709	ACTB_HUMAN	46	46.7	11.91	1.9e-21	548.251	3	183996	-0.17	VMVG	MGQKDSYVGDEAQSK			Q20170801-07	50.5495	47	4e-11	6	375	41737.1	HUMAN	Actin, cytoplasmic 1
[1-1]	3	P60709	ACTB_HUMAN	46	46.7	11.91	1.9e-21	442.22	3	268665	-1.9	GQKD	SYVGDEAQSKR		Abu@N-term	Q20170801-07	38.8497	52	1.2e-10	6	375	41737.1	HUMAN	Actin, cytoplasmic 1
[1-1]	3	P60709	ACTB_HUMAN	46	46.7	11.91	1.9e-21	781.726	3	334481	-1.3	VDIR	KDLYANTVLSGGTTMYPGIADR			Q20170801-09	174.987	291	1.6e-10	2	375	41737.1	HUMAN	Actin, cytoplasmic 1
[1-1]	3	P60709	ACTB_HUMAN	46	46.7	11.91	1.9e-21	450.465	4	757288	0.18	VMVG	MGQKDSYVGDEAQSKR			Q20170801-09	44.5142	47	1.7e-10	6	375	41737.1	HUMAN	Actin, cytoplasmic 1
[1-1]	3	P60709	ACTB_HUMAN	46	46.7	11.91	1.9e-21	400.24	3	2000000	-0.27	DAPR	AVFPSIVGRPR			Q20170801-09	131.938	29	2.2e-10	10	375	41737.1	HUMAN	Actin, cytoplasmic 1
[1-1]	3	P60709	ACTB_HUMAN	46	46.7	11.91	1.9e-21	505.921	3	1400000	0.58	DMEK	IWHHTFYNELR			Q20170801-09	128.855	85	2.7e-10	9	375	41737.1	HUMAN	Actin, cytoplasmic 1
[1-1]	3	P60709	ACTB_HUMAN	46	46.7	11.91	1.9e-21	488.73	4	257492	1.3	WISK	QEYDESGPSIVHRKCF	Carbamidomethyl@15		Q20170801-09	109.373	360	3.6e-10	6	375	41737.1	HUMAN	Actin, cytoplasmic 1
[1-1]	3	P60709	ACTB_HUMAN	46	46.7	11.91	1.9e-21	592.523	4	407895	0.48	GRPR	HQGVMVGMGQKDSYVGDEAQSK		Oxidation@5'17	Q20170801-09	92.9373	40	3.6e-10	6	375	41737.1	HUMAN	Actin, cytoplasmic 1
[1-1]	3	P60709	ACTB_HUMAN	46	46.7	11.91	1.9e-21	663.311	2	260761	-0.25	NTVL	SGGTTMYPGIADR			Q20170801-09	110.066	300	2.9e-09	6	375	41737.1	HUMAN	Actin, cytoplasmic 1
[1-1]	3	P60709	ACTB_HUMAN	46	46.7	11.91	1.9e-21	652.025	3	685189	-1.2	NELR	VAPEEHPVLLTEAPLNPK			Q20170801-07	156.957	96	1.8e-08	2	375	41737.1	HUMAN	Actin, cytoplasmic 1
[1-1]	3	P60709	ACTB_HUMAN	46	46.7	11.91	1.9e-21	594.285	2	112959	-2.1	GRPR	HQGVMVGMGQK		Oxidation@8'42	Q20170801-09	28.4595	40	3.1e-08	7	375	41737.1	HUMAN	Actin, cytoplasmic 1
[1-1]	3	P60709	ACTB_HUMAN	46	46.7	11.91	1.9e-21	452.21	3	101386	-5.4	MGQK	DSYVGDEAQSKR			Q20170801-07	40.7085	51	3.2e-08	6	375	41737.1	HUMAN	Actin, cytoplasmic 1
[1-1]	3	P60709	ACTB_HUMAN	46	46.7	11.91	1.9e-21	592.523	4	149444	0.29	GRPR	HQGVMVGMGQKDSYVGDEAQSK		Oxidation@8'15	Q20170801-07	86.4968	40	5.8e-08	6	375	41737.1	HUMAN	Actin, cytoplasmic 1
[1-1]	3	P60709	ACTB_HUMAN	46	46.7	11.91	1.9e-21	819.912	2	274000	0.45	LYAN	TVLSGGTTMYPGIADR			Q20170801-09	156.108	297	1.5e-07	2	375	41737.1	HUMAN	Actin, cytoplasmic 1
[1-1]	3	P60709	ACTB_HUMAN	46	46.7	11.91	1.9e-21	488.728	2	780491	-0.35	GMCK	AGFAGDDAPR			Q20170801-09	57.0404	19	1.6e-07	10	375	41737.1	HUMAN	Actin, cytoplasmic 1
[1-1]	3	P60709	ACTB_HUMAN	46	46.7	11.91	1.9e-21	491.783	2	393532	2.4	HPVL	LTEAPLNPK			Q20170801-09	75.0759	105	2.8e-07	11	375	41737.1	HUMAN	Actin, cytoplasmic 1
[1-1]	3	P60709	ACTB_HUMAN	46	46.7	11.91	1.9e-21	531.255	2	42465	2.2	GMCK	AGFAGDDAPR		Abu@N-term	Q20170801-09	69.2365	19	8.7e-07	10	375	41737.1	HUMAN	Actin, cytoplasmic 1
[1-1]	3	P60709	ACTB_HUMAN	46	46.7	11.91	1.9e-21	597.335	3	685417	0.17	IADR	MQKEITALAPSTMKIK			Q20170801-09	134.05	313	1.1e-06	6	375	41737.1	HUMAN	Actin, cytoplasmic 1
[1-1]	3	P60709	ACTB_HUMAN	46	46.7	11.91	1.9e-21	581.312	2	368295	-1.8	RMQK	EITALAPSTMK			Q20170801-07	122.937	316	1.2e-06	6	375	41737.1	HUMAN	Actin, cytoplasmic 1
[1-1]	3	P60709	ACTB_HUMAN	46	46.7	11.91	1.9e-21	495.735	2	442568	-0.72	MCKA	GFAGDDAPR		Abu@N-term	Q20170801-09	66.2363	20	1.5e-06	10	375	41737.1	HUMAN	Actin, cytoplasmic 1
[1-1]	3	P60709	ACTB_HUMAN	46	46.7	11.91	1.9e-21	518.829	2	475133	-0.41	STMK	IKIIAPPER			Q20170801-09	98.704	327	5.3e-06	7	375	41737.1	HUMAN	Actin, cytoplasmic 1
[1-1]	3	P60709	ACTB_HUMAN	46	46.7	11.91	1.9e-21	512.25	2	266954	0.59	SGGT	TMYPGIADR			Q20170801-09	102.062	304	1.9e-05	7	375	41737.1	HUMAN	Actin, cytoplasmic 1
[1-1]	3	P60709	ACTB_HUMAN	46	46.7	11.91	1.9e-21	388.92	3	1550000	-0.62	STMK	IKIIAPPERK			Q20170801-09	77.7864	327	5.6e-05	7	375	41737.1	HUMAN	Actin, cytoplasmic 1
[1-1]	3	P60709	ACTB_HUMAN	46	46.7	11.91	1.9e-21	406.2	3	288909	0.17	EKIW	HHTFYNELR			Q20170801-09	83.2939	87	9.8e-05	9	375	41737.1	HUMAN	Actin, cytoplasmic 1
[1-1]	3	P60709	ACTB_HUMAN	46	46.7	11.91	1.9e-21	522.274	3	704764	0.077	IADR	MQKEITALAPSTMK		Oxidation@1'85	Q20170801-09	107.203	313	0.00011	6	375	41737.1	HUMAN	Actin, cytoplasmic 1
[1-1]	3	P60709	ACTB_HUMAN	46	46.7	11.91	1.9e-21	398.239	2	369092	-1.9	MKIK	IIAPPER			Q20170801-09	64.4785	329	0.00011	7	375	41737.1	HUMAN	Actin, cytoplasmic 1
[1-1]	3	P60709	ACTB_HUMAN	46	46.7	11.91	1.9e-21	468.271	3	228564	-0.11	RMQK	EITALAPSTMKIK			Q20170801-07	138.691	316	0.00018	6	375	41737.1	HUMAN	Actin, cytoplasmic 1
[1-1]	3	P60709	ACTB_HUMAN	46	46.7	11.91	1.9e-21	462.287	2	790617	-0.31	MKIK	IIAPPERK			Q20170801-09	42.7939	329	0.00035	7	375	41737.1	HUMAN	Actin, cytoplasmic 1
[1-1]	3	P60709	ACTB_HUMAN	46	46.7	11.91	1.9e-21	365.247	2	450391	-1.2	QSKR	GILTLK		Abu@N-term	Q20170801-09	120.408	63	0.0055	17	375	41737.1	HUMAN	Actin, cytoplasmic 1
[1-2]	1	P68133	ACTS_HUMAN	35	36.3	11.44	1.4e-20	836.396	3	217061	-0.93	GRPR	HQGVMVGMGQKDSYVGDEAQSKR			Q20170801-09	97.4539	42	1.4e-20	6	377	42051.4	HUMAN	Actin, alpha skeletal muscle
[1-2]	1	P68133	ACTS_HUMAN	35	36.3	11.44	1.4e-20	784.363	3	375072	-0.06	GRPR	HQGVMVGMGQKDSYVGDEAQSK			Q20170801-07	108.522	42	1.8e-19	6	377	42051.4	HUMAN	Actin, alpha skeletal muscle
[1-2]	1	P68133	ACTS_HUMAN	35	36.3	11.44	1.4e-20	895.95	2	2030000	0.11	SLEK	SYELPDGQVITIGNER			Q20170801-07	179.892	241	5.9e-16	10	377	42051.4	HUMAN	Actin, alpha skeletal muscle
[1-2]	1	P68133	ACTS_HUMAN	35	36.3	11.44	1.4e-20	631.548	4	285332	0.11	GRPR	HQGVMVGMGQKDSYVGDEAQSKR		Oxidation@5'25	Q20170801-09	85.5025	42	4.8e-14	6	377	42051.4	HUMAN	Actin, alpha skeletal muscle
[1-2]	1	P68133	ACTS_HUMAN	35	36.3	11.44	1.4e-20	631.548	4	249653	-0.044	GRPR	HQGVMVGMGQKDSYVGDEAQSKR		Oxidation@8'13	Q20170801-09	76.9129	42	1.9e-13	6	377	42051.4	HUMAN	Actin, alpha skeletal muscle
[1-2]	1	P68133	ACTS_HUMAN	35	36.3	11.44	1.4e-20	774.909	2	577627	-1.1	IADR	MQKEITALAPSTMK			Q20170801-09	120.596	315	3.5e-13	6	377	42051.4	HUMAN	Actin, alpha skeletal muscle
[1-2]	1	P68133	ACTS_HUMAN	35	36.3	11.44	1.4e-20	586.289	2	3300000	-0.36	GRPR	HQGVMVGMGQK			Q20170801-09	59.4777	42	4.8e-13	7	377	42051.4	HUMAN	Actin, alpha skeletal muscle
[1-2]	1	P68133	ACTS_HUMAN	35	36.3	11.44	1.4e-20	594.287	2	494504	-0.064	GRPR	HQGVMVGMGQK		Oxidation@5'39	Q20170801-09	42.3906	42	4.9e-12	7	377	42051.4	HUMAN	Actin, alpha skeletal muscle
[1-2]	1	P68133	ACTS_HUMAN	35	36.3	11.44	1.4e-20	438.968	4	338404	-1.3	MVGM	GQKDSYVGDEAQSKR		Abu@N-term	Q20170801-09	33.7301	50	2.8e-11	6	377	42051.4	HUMAN	Actin, alpha skeletal muscle
[1-2]	1	P68133	ACTS_HUMAN	35	36.3	11.44	1.4e-20	548.251	3	183996	-0.17	VMVG	MGQKDSYVGDEAQSK			Q20170801-07	50.5495	49	4e-11	6	377	42051.4	HUMAN	Actin, alpha skeletal muscle
[1-2]	1	P68133	ACTS_HUMAN	35	36.3	11.44	1.4e-20	442.22	3	268665	-1.9	GQKD	SYVGDEAQSKR		Abu@N-term	Q20170801-07	38.8497	54	1.2e-10	6	377	42051.4	HUMAN	Actin, alpha skeletal muscle
[1-2]	1	P68133	ACTS_HUMAN	35	36.3	11.44	1.4e-20	450.465	4	757288	0.18	VMVG	MGQKDSYVGDEAQSKR			Q20170801-09	44.5142	49	1.7e-10	6	377	42051.4	HUMAN	Actin, alpha skeletal muscle
[1-2]	1	P68133	ACTS_HUMAN	35	36.3	11.44	1.4e-20	400.24	3	2000000	-0.27	DAPR	AVFPSIVGRPR			Q20170801-09	131.938	31	2.2e-10	10	377	42051.4	HUMAN	Actin, alpha skeletal muscle
[1-2]	1	P68133	ACTS_HUMAN	35	36.3	11.44	1.4e-20	505.921	3	1400000	0.58	DMEK	IWHHTFYNELR			Q20170801-09	128.855	87	2.7e-10	9	377	42051.4	HUMAN	Actin, alpha skeletal muscle
[1-2]	1	P68133	ACTS_HUMAN	35	36.3	11.44	1.4e-20	592.523	4	407895	0.48	GRPR	HQGVMVGMGQKDSYVGDEAQSK		Oxidation@5'17	Q20170801-09	92.9373	42	3.6e-10	6	377	42051.4	HUMAN	Actin, alpha skeletal muscle
[1-2]	1	P68133	ACTS_HUMAN	35	36.3	11.44	1.4e-20	663.311	2	260761	-0.25	NNVM	SGGTTMYPGIADR			Q20170801-09	110.066	302	2.9e-09	6	377	42051.4	HUMAN	Actin, alpha skeletal muscle
[1-2]	1	P68133	ACTS_HUMAN	35	36.3	11.44	1.4e-20	594.285	2	112959	-2.1	GRPR	HQGVMVGMGQK		Oxidation@8'42	Q20170801-09	28.4595	42	3.1e-08	7	377	42051.4	HUMAN	Actin, alpha skeletal muscle
[1-2]	1	P68133	ACTS_HUMAN	35	36.3	11.44	1.4e-20	452.21	3	101386	-5.4	MGQK	DSYVGDEAQSKR			Q20170801-07	40.7085	53	3.2e-08	6	377	42051.4	HUMAN	Actin, alpha skeletal muscle
[1-2]	1	P68133	ACTS_HUMAN	35	36.3	11.44	1.4e-20	592.523	4	149444	0.29	GRPR	HQGVMVGMGQKDSYVGDEAQSK		Oxidation@8'15	Q20170801-07	86.4968	42	5.8e-08	6	377	42051.4	HUMAN	Actin, alpha skeletal muscle
[1-2]	1	P68133	ACTS_HUMAN	35	36.3	11.44	1.4e-20	488.728	2	780491	-0.35	GLVK	AGFAGDDAPR			Q20170801-09	57.0404	21	1.6e-07	10	377	42051.4	HUMAN	Actin, alpha skeletal muscle
[1-2]	1	P68133	ACTS_HUMAN	35	36.3	11.44	1.4e-20	491.783	2	393532	2.4	HPTL	LTEAPLNPK			Q20170801-09	75.0759	107	2.8e-07	11	377	42051.4	HUMAN	Actin, alpha skeletal muscle
[1-2]	1	P68133	ACTS_HUMAN	35	36.3	11.44	1.4e-20	531.255	2	42465	2.2	GLVK	AGFAGDDAPR		Abu@N-term	Q20170801-09	69.2365	21	8.7e-07	10	377	42051.4	HUMAN	Actin, alpha skeletal muscle
[1-2]	1	P68133	ACTS_HUMAN	35	36.3	11.44	1.4e-20	597.335	3	685417	0.17	IADR	MQKEITALAPSTMKIK			Q20170801-09	134.05	315	1.1e-06	6	377	42051.4	HUMAN	Actin, alpha skeletal muscle
[1-2]	1	P68133	ACTS_HUMAN	35	36.3	11.44	1.4e-20	1029.84	3	155276	1.3	IMKC	DIDIRKDLYANNVMSGGTTMYPGIADR		Abu@N-term;Oxidation@14'64	Q20170801-09	197.121	288	1.2e-06	1	377	42051.4	HUMAN	Actin, alpha skeletal muscle
[1-2]	1	P68133	ACTS_HUMAN	35	36.3	11.44	1.4e-20	581.312	2	368295	-1.8	RMQK	EITALAPSTMK			Q20170801-07	122.937	318	1.2e-06	6	377	42051.4	HUMAN	Actin, alpha skeletal muscle
[1-2]	1	P68133	ACTS_HUMAN	35	36.3	11.44	1.4e-20	495.735	2	442568	-0.72	LVKA	GFAGDDAPR		Abu@N-term	Q20170801-09	66.2363	22	1.5e-06	10	377	42051.4	HUMAN	Actin, alpha skeletal muscle
[1-2]	1	P68133	ACTS_HUMAN	35	36.3	11.44	1.4e-20	518.829	2	475133	-0.41	STMK	IKIIAPPER			Q20170801-09	98.704	329	5.3e-06	7	377	42051.4	HUMAN	Actin, alpha skeletal muscle
[1-2]	1	P68133	ACTS_HUMAN	35	36.3	11.44	1.4e-20	512.25	2	266954	0.59	SGGT	TMYPGIADR			Q20170801-09	102.062	306	1.9e-05	7	377	42051.4	HUMAN	Actin, alpha skeletal muscle
[1-2]	1	P68133	ACTS_HUMAN	35	36.3	11.44	1.4e-20	388.92	3	1550000	-0.62	STMK	IKIIAPPERK			Q20170801-09	77.7864	329	5.6e-05	7	377	42051.4	HUMAN	Actin, alpha skeletal muscle
[1-2]	1	P68133	ACTS_HUMAN	35	36.3	11.44	1.4e-20	406.2	3	288909	0.17	EKIW	HHTFYNELR			Q20170801-09	83.2939	89	9.8e-05	9	377	42051.4	HUMAN	Actin, alpha skeletal muscle
[1-2]	1	P68133	ACTS_HUMAN	35	36.3	11.44	1.4e-20	522.274	3	704764	0.077	IADR	MQKEITALAPSTMK		Oxidation@1'85	Q20170801-09	107.203	315	0.00011	6	377	42051.4	HUMAN	Actin, alpha skeletal muscle
[1-2]	1	P68133	ACTS_HUMAN	35	36.3	11.44	1.4e-20	398.239	2	369092	-1.9	MKIK	IIAPPER			Q20170801-09	64.4785	331	0.00011	7	377	42051.4	HUMAN	Actin, alpha skeletal muscle
[1-2]	1	P68133	ACTS_HUMAN	35	36.3	11.44	1.4e-20	468.271	3	228564	-0.11	RMQK	EITALAPSTMKIK			Q20170801-07	138.691	318	0.00018	6	377	42051.4	HUMAN	Actin, alpha skeletal muscle
[1-2]	1	P68133	ACTS_HUMAN	35	36.3	11.44	1.4e-20	462.287	2	790617	-0.31	MKIK	IIAPPERK			Q20170801-09	42.7939	331	0.00035	7	377	42051.4	HUMAN	Actin, alpha skeletal muscle
[1-2]	1	P68133	ACTS_HUMAN	35	36.3	11.44	1.4e-20	365.247	2	450391	-1.2	QSKR	GILTLK		Abu@N-term	Q20170801-09	120.408	65	0.0055	17	377	42051.4	HUMAN	Actin, alpha skeletal muscle
[1-3]	1	Q562R1	ACTBL_HUMAN	11	17.6	9.83	1.4e-17	632.804	2	202478	-0.69	ELSA	LVVDNGSGMCK	Carbamidomethyl@10	Abu@N-term	Q20170801-07	92.6506	9	1.4e-17	2	376	42003.6	HUMAN	Beta-actin-like protein 2
[1-3]	1	Q562R1	ACTBL_HUMAN	11	17.6	9.83	1.4e-17	895.95	2	2030000	0.11	SPER	SYELPDGQVITIGNER			Q20170801-07	179.892	240	5.9e-16	10	376	42003.6	HUMAN	Beta-actin-like protein 2
[1-3]	1	Q562R1	ACTBL_HUMAN	11	17.6	9.83	1.4e-17	586.289	2	3300000	-0.36	GRPR	HQGVMVGMGQK			Q20170801-09	59.4777	41	4.8e-13	7	376	42003.6	HUMAN	Beta-actin-like protein 2
[1-3]	1	Q562R1	ACTBL_HUMAN	11	17.6	9.83	1.4e-17	594.287	2	494504	-0.064	GRPR	HQGVMVGMGQK		Oxidation@5'39	Q20170801-09	42.3906	41	4.9e-12	7	376	42003.6	HUMAN	Beta-actin-like protein 2
[1-3]	1	Q562R1	ACTBL_HUMAN	11	17.6	9.83	1.4e-17	594.285	2	112959	-2.1	GRPR	HQGVMVGMGQK		Oxidation@8'42	Q20170801-09	28.4595	41	3.1e-08	7	376	42003.6	HUMAN	Beta-actin-like protein 2
[1-3]	1	Q562R1	ACTBL_HUMAN	11	17.6	9.83	1.4e-17	491.783	2	393532	2.4	HPIL	LTEAPLNPK			Q20170801-09	75.0759	106	2.8e-07	11	376	42003.6	HUMAN	Beta-actin-like protein 2
[1-3]	1	Q562R1	ACTBL_HUMAN	11	17.6	9.83	1.4e-17	518.829	2	475133	-0.41	STMK	IKIIAPPER			Q20170801-09	98.704	328	5.3e-06	7	376	42003.6	HUMAN	Beta-actin-like protein 2
[1-3]	1	Q562R1	ACTBL_HUMAN	11	17.6	9.83	1.4e-17	512.25	2	266954	0.59	SGGS	TMYPGIADR			Q20170801-09	102.062	305	1.9e-05	7	376	42003.6	HUMAN	Beta-actin-like protein 2
[1-3]	1	Q562R1	ACTBL_HUMAN	11	17.6	9.83	1.4e-17	388.92	3	1550000	-0.62	STMK	IKIIAPPERK			Q20170801-09	77.7864	328	5.6e-05	7	376	42003.6	HUMAN	Beta-actin-like protein 2
[1-3]	1	Q562R1	ACTBL_HUMAN	11	17.6	9.83	1.4e-17	398.239	2	369092	-1.9	MKIK	IIAPPER			Q20170801-09	64.4785	330	0.00011	7	376	42003.6	HUMAN	Beta-actin-like protein 2
[1-3]	1	Q562R1	ACTBL_HUMAN	11	17.6	9.83	1.4e-17	462.287	2	790617	-0.31	MKIK	IIAPPERK			Q20170801-09	42.7939	330	0.00035	7	376	42003.6	HUMAN	Beta-actin-like protein 2
[2]		P08238	HS90B_HUMAN	21	31.2	8.27	5.1e-15	797.731	3	117627	-1.4	ETQK	SIYYITGESKEQVANSAFVER			Q20170801-07	162.83	482	5.1e-15	1	724	83264.9	HUMAN	Heat shock protein HSP 90-beta
[2]		P08238	HS90B_HUMAN	21	31.2	8.27	5.1e-15	698.706	3	2300000	0.55	VVKK	HSQFIGYPITLYLEKER			Q20170801-09	183.257	205	1.2e-12	2	724	83264.9	HUMAN	Heat shock protein HSP 90-beta
[2]		P08238	HS90B_HUMAN	21	31.2	8.27	5.1e-15	658.294	2	73603	5.2	CIVT	STYGWTANMER			Q20170801-07	126.158	594	7.4e-12	3	724	83264.9	HUMAN	Heat shock protein HSP 90-beta
[2]		P08238	HS90B_HUMAN	21	31.2	8.27	5.1e-15	683.367	2	183694	-2.1	PQER	TLTLVDTGIGMTK		Oxidation@11	Q20170801-09	147.512	83	1.8e-10	5	724	83264.9	HUMAN	Heat shock protein HSP 90-beta
[2]		P08238	HS90B_HUMAN	21	31.2	8.27	5.1e-15	675.371	2	4000000	0.57	PQER	TLTLVDTGIGMTK			Q20170801-09	168.854	83	1.8e-10	5	724	83264.9	HUMAN	Heat shock protein HSP 90-beta
[2]		P08238	HS90B_HUMAN	21	31.2	8.27	5.1e-15	603.658	3	828930	0.75	VVKK	HSQFIGYPITLYLEK			Q20170801-09	190.587	205	2.2e-10	3	724	83264.9	HUMAN	Heat shock protein HSP 90-beta
[2]		P08238	HS90B_HUMAN	21	31.2	8.27	5.1e-15	509.92	3	2780000	0.43	EFYK	SLTNDWEDHLAVK			Q20170801-09	153.416	307	2.5e-09	2	724	83264.9	HUMAN	Heat shock protein HSP 90-beta
[2]		P08238	HS90B_HUMAN	21	31.2	8.27	5.1e-15	858.477	3	116857	-2.2	PQER	TLTLVDTGIGMTKADLINNLGTIAK			Q20170801-09	201.306	83	4.7e-09	4	724	83264.9	HUMAN	Heat shock protein HSP 90-beta
[2]		P08238	HS90B_HUMAN	21	31.2	8.27	5.1e-15	726.32	3	314778	-0.0027	ELLR	YHTSQSGDEMTSLSEYVSR			Q20170801-09	150.786	457	3.1e-08	1	724	83264.9	HUMAN	Heat shock protein HSP 90-beta
[2]		P08238	HS90B_HUMAN	21	31.2	8.27	5.1e-15	446.494	4	339742	1.9	MAKK	HLEINPDHPIVETLR			Q20170801-09	148.602	625	6.3e-08	1	724	83264.9	HUMAN	Heat shock protein HSP 90-beta
[2]		P08238	HS90B_HUMAN	21	31.2	8.27	5.1e-15	580.795	2	2230000	-1.2	ETQK	SIYYITGESK			Q20170801-09	114.118	482	1.4e-07	2	724	83264.9	HUMAN	Heat shock protein HSP 90-beta
[2]		P08238	HS90B_HUMAN	21	31.2	8.27	5.1e-15	381.191	3	101900	-2.1	KNLK	LGIHEDSTNR			Q20170801-07	41.9547	439	1.3e-06	1	724	83264.9	HUMAN	Heat shock protein HSP 90-beta
[2]		P08238	HS90B_HUMAN	21	31.2	8.27	5.1e-15	576.283	2	277231	0.17	IKEK	YIDQEELNK			Q20170801-09	75.3561	276	1.5e-06	4	724	83264.9	HUMAN	Heat shock protein HSP 90-beta
[2]		P08238	HS90B_HUMAN	21	31.2	8.27	5.1e-15	597.828	2	702037	1.3	KELK	IDIIPNPQER			Q20170801-09	138.982	73	1.5e-06	2	724	83264.9	HUMAN	Heat shock protein HSP 90-beta
[2]		P08238	HS90B_HUMAN	21	31.2	8.27	5.1e-15	674.835	2	50638	-1.1	LAVK	HFSVEGQLEFR			Q20170801-09	149.001	320	2.2e-06	5	724	83264.9	HUMAN	Heat shock protein HSP 90-beta
[2]		P08238	HS90B_HUMAN	21	31.2	8.27	5.1e-15	683.333	4	295112	1.7	ELNK	TKPIWTRNPDDITQEEYGEFYK			Q20170801-09	169.629	285	4.5e-05	1	724	83264.9	HUMAN	Heat shock protein HSP 90-beta
[2]		P08238	HS90B_HUMAN	21	31.2	8.27	5.1e-15	625.313	2	34963	0.79	GESK	EQVANSAFVER			Q20170801-07	91.4069	492	4.7e-05	2	724	83264.9	HUMAN	Heat shock protein HSP 90-beta
[2]		P08238	HS90B_HUMAN	21	31.2	8.27	5.1e-15	405.694	2	176771	-0.73	SKAK	FENLCK	Carbamidomethyl@5		Q20170801-09	50.9056	560	0.00041	5	724	83264.9	HUMAN	Heat shock protein HSP 90-beta
[2]		P08238	HS90B_HUMAN	21	31.2	8.27	5.1e-15	367.226	2	439051	-1.6	FDGK	SLVSVTK			Q20170801-07	62.1625	532	0.00064	3	724	83264.9	HUMAN	Heat shock protein HSP 90-beta
[2]		P08238	HS90B_HUMAN	21	31.2	8.27	5.1e-15	837.393	2	101003	-1.1	MKAQ	ALRDNSTMGYMMAK		Abu@N-term	Q20170801-09	125.198	610	0.0012	2	724	83264.9	HUMAN	Heat shock protein HSP 90-beta
[2]		P08238	HS90B_HUMAN	21	31.2	8.27	5.1e-15	504.516	4	121979	-0.31	RGTK	VILHLKEDQTEYLEER			Q20170801-07	144.748	181	0.0039	4	724	83264.9	HUMAN	Heat shock protein HSP 90-beta
[2-1]	10	P07900	HS90A_HUMAN	19	28.4	6.86	4.2e-12	596.32	3	642332	0.11	AAKK	HLEINPDHSIIETLR			Q20170801-09	160.48	633	4.2e-12	1	732	84660.4	HUMAN	Heat shock protein HSP 90-alpha
[2-1]	10	P07900	HS90A_HUMAN	19	28.4	6.86	4.2e-12	658.294	2	73603	5.2	CIVT	STYGWTANMER			Q20170801-07	126.158	602	7.4e-12	3	732	84660.4	HUMAN	Heat shock protein HSP 90-alpha
[2-1]	10	P07900	HS90A_HUMAN	19	28.4	6.86	4.2e-12	688.702	3	260841	0.66	IVKK	HSQFIGYPITLFVEKER			Q20170801-09	187.115	210	2.3e-11	1	732	84660.4	HUMAN	Heat shock protein HSP 90-alpha
[2-1]	10	P07900	HS90A_HUMAN	19	28.4	6.86	4.2e-12	683.367	2	183694	-2.1	KQDR	TLTIVDTGIGMTK		Oxidation@11	Q20170801-09	147.512	88	1.8e-10	5	732	84660.4	HUMAN	Heat shock protein HSP 90-alpha
[2-1]	10	P07900	HS90A_HUMAN	19	28.4	6.86	4.2e-12	675.371	2	4000000	0.57	KQDR	TLTIVDTGIGMTK			Q20170801-09	168.854	88	1.8e-10	5	732	84660.4	HUMAN	Heat shock protein HSP 90-alpha
[2-1]	10	P07900	HS90A_HUMAN	19	28.4	6.86	4.2e-12	482.213	2	234246	-1.6	FTVR	TDTGEPMGR			Q20170801-09	27.0961	174	5.3e-10	1	732	84660.4	HUMAN	Heat shock protein HSP 90-alpha
[2-1]	10	P07900	HS90A_HUMAN	19	28.4	6.86	4.2e-12	612.817	2	1350000	0.72	ENQK	HIYYITGETK			Q20170801-09	90.791	490	2e-09	2	732	84660.4	HUMAN	Heat shock protein HSP 90-alpha
[2-1]	10	P07900	HS90A_HUMAN	19	28.4	6.86	4.2e-12	509.92	3	2780000	0.43	EFYK	SLTNDWEDHLAVK			Q20170801-09	153.416	315	2.5e-09	2	732	84660.4	HUMAN	Heat shock protein HSP 90-alpha
[2-1]	10	P07900	HS90A_HUMAN	19	28.4	6.86	4.2e-12	858.477	3	116857	-2.2	KQDR	TLTIVDTGIGMTKADLINNLGTIAK			Q20170801-09	201.306	88	4.7e-09	4	732	84660.4	HUMAN	Heat shock protein HSP 90-alpha
[2-1]	10	P07900	HS90A_HUMAN	19	28.4	6.86	4.2e-12	906.099	3	62805	-2.1	ELNK	TKPIWTRNPDDITNEEYGEFYK			Q20170801-09	168.155	293	1.8e-07	1	732	84660.4	HUMAN	Heat shock protein HSP 90-alpha
[2-1]	10	P07900	HS90A_HUMAN	19	28.4	6.86	4.2e-12	814.404	3	46585	-4.3	ENQK	HIYYITGETKDQVANSAFVER			Q20170801-09	150.93	490	3.2e-07	1	732	84660.4	HUMAN	Heat shock protein HSP 90-alpha
[2-1]	10	P07900	HS90A_HUMAN	19	28.4	6.86	4.2e-12	423.205	3	63176	-0.51	SSGF	SLEDPQTHANR			Q20170801-09	33.8569	677	9.2e-07	1	732	84660.4	HUMAN	Heat shock protein HSP 90-alpha
[2-1]	10	P07900	HS90A_HUMAN	19	28.4	6.86	4.2e-12	576.283	2	277231	0.17	IKEK	YIDQEELNK			Q20170801-09	75.3561	284	1.5e-06	4	732	84660.4	HUMAN	Heat shock protein HSP 90-alpha
[2-1]	10	P07900	HS90A_HUMAN	19	28.4	6.86	4.2e-12	674.835	2	50638	-1.1	LAVK	HFSVEGQLEFR			Q20170801-09	149.001	328	2.2e-06	5	732	84660.4	HUMAN	Heat shock protein HSP 90-alpha
[2-1]	10	P07900	HS90A_HUMAN	19	28.4	6.86	4.2e-12	538.598	3	643410	1.5	MKAQ	ALRDNSTMGYMAAK		Abu@N-term	Q20170801-09	104.395	618	7e-06	1	732	84660.4	HUMAN	Heat shock protein HSP 90-alpha
[2-1]	10	P07900	HS90A_HUMAN	19	28.4	6.86	4.2e-12	618.301	2	71949	-5.5	GETK	DQVANSAFVER			Q20170801-09	94.9077	500	1.7e-05	1	732	84660.4	HUMAN	Heat shock protein HSP 90-alpha
[2-1]	10	P07900	HS90A_HUMAN	19	28.4	6.86	4.2e-12	405.694	2	176771	-0.73	KKTK	FENLCK	Carbamidomethyl@5		Q20170801-09	50.9056	568	0.00041	5	732	84660.4	HUMAN	Heat shock protein HSP 90-alpha
[2-1]	10	P07900	HS90A_HUMAN	19	28.4	6.86	4.2e-12	495.289	2	72730	1.7	NLCK	IMKDILEK			Q20170801-09	91.3527	574	0.0015	1	732	84660.4	HUMAN	Heat shock protein HSP 90-alpha
[2-1]	10	P07900	HS90A_HUMAN	19	28.4	6.86	4.2e-12	504.516	4	121979	-0.31	RGTK	VILHLKEDQTEYLEER			Q20170801-07	144.748	186	0.0039	4	732	84660.4	HUMAN	Heat shock protein HSP 90-alpha
[2-2]	1	Q58FG0	HS905_HUMAN	2	4.8	4.16	2e-09	612.817	2	1350000	0.72	ANQK	HIYYITGETK			Q20170801-09	90.791	175	2e-09	2	334	38738.3	HUMAN	Putative heat shock protein HSP 90-alpha A5
[2-2]	1	Q58FG0	HS905_HUMAN	2	4.8	4.16	2e-09	405.694	2	176771	-0.73	KKTK	FENLCK	Carbamidomethyl@5		Q20170801-09	50.9056	253	0.00041	5	334	38738.3	HUMAN	Putative heat shock protein HSP 90-alpha A5
[3]		P68363	TBA1B_HUMAN	14	33.7	9.97	7.4e-18	1004.45	2	300074	1.1	PSDK	TIGGGDDSFNTFFSETGAGK			Q20170801-09	184.229	41	7.4e-18	5	451	50152.1	HUMAN	Tubulin alpha-1B chain
[3]		P68363	TBA1B_HUMAN	14	33.7	9.97	7.4e-18	833.064	3	244349	1.5	PSDK	TIGGGDDSFNTFFSETGAGKHVPR			Q20170801-09	169.82	41	1.2e-14	5	451	50152.1	HUMAN	Tubulin alpha-1B chain
[3]		P68363	TBA1B_HUMAN	14	33.7	9.97	7.4e-18	805.74	3	69914	0.5	GTYR	QLFHPEQLITGKEDAANNYAR			Q20170801-09	158.638	85	1.4e-10	6	451	50152.1	HUMAN	Tubulin alpha-1B chain
[3]		P68363	TBA1B_HUMAN	14	33.7	9.97	7.4e-18	834.95	2	237601	-1.7	FKVG	INYQPPTVVPGGDLAK			Q20170801-07	161.49	355	1.5e-10	7	451	50152.1	HUMAN	Tubulin alpha-1B chain
[3]		P68363	TBA1B_HUMAN	14	33.7	9.97	7.4e-18	835.407	2	464403	0.87	KTKR	SIQFVDWCPTGFK	Carbamidomethyl@8	Abu@N-term	Q20170801-07	194.076	340	7e-10	2	451	50152.1	HUMAN	Tubulin alpha-1B chain
[3]		P68363	TBA1B_HUMAN	14	33.7	9.97	7.4e-18	792.881	2	75940	2.3	KTKR	SIQFVDWCPTGFK	Carbamidomethyl@8		Q20170801-07	191.938	340	9.1e-10	2	451	50152.1	HUMAN	Tubulin alpha-1B chain
[3]		P68363	TBA1B_HUMAN	14	33.7	9.97	7.4e-18	647.799	2	229164	-0.76	EITN	ACFEPANQMVK	Carbamidomethyl@2		Q20170801-09	110.123	294	2.2e-09	6	451	50152.1	HUMAN	Tubulin alpha-1B chain
[3]		P68363	TBA1B_HUMAN	14	33.7	9.97	7.4e-18	654.807	2	452134	-0.64	ITNA	CFEPANQMVK	Carbamidomethyl@1	Abu@N-term	Q20170801-07	120.373	295	1.2e-08	6	451	50152.1	HUMAN	Tubulin alpha-1B chain
[3]		P68363	TBA1B_HUMAN	14	33.7	9.97	7.4e-18	688.352	2	49570	0.2	VCML	SNTTAIAEAWAR		Abu@N-term	Q20170801-07	145.181	379	5.5e-08	6	451	50152.1	HUMAN	Tubulin alpha-1B chain
[3]		P68363	TBA1B_HUMAN	14	33.7	9.97	7.4e-18	586.325	3	195449	-1.4	PYPR	IHFPLATYAPVISAEK			Q20170801-09	184.158	265	1.9e-07	6	451	50152.1	HUMAN	Tubulin alpha-1B chain
[3]		P68363	TBA1B_HUMAN	14	33.7	9.97	7.4e-18	851.456	2	117203	-1.2	HVPR	AVFVDLEPTVIDEVR			Q20170801-09	194.255	65	1.4e-06	3	451	50152.1	HUMAN	Tubulin alpha-1B chain
[3]		P68363	TBA1B_HUMAN	14	33.7	9.97	7.4e-18	912.995	2	239001	-1.9	TGFK	VGINYQPPTVVPGGDLAK			Q20170801-09	172.064	353	4.2e-06	7	451	50152.1	HUMAN	Tubulin alpha-1B chain
[3]		P68363	TBA1B_HUMAN	14	33.7	9.97	7.4e-18	508.293	2	283832	-0.15	VVPK	DVNAAIATIK			Q20170801-09	124.982	327	7.3e-06	5	451	50152.1	HUMAN	Tubulin alpha-1B chain
[3]		P68363	TBA1B_HUMAN	14	33.7	9.97	7.4e-18	524.581	3	879486	0.53	CDPR	HGKYMACCLLYR	Carbamidomethyl@7;Carbamidomethyl@8		Q20170801-09	119.446	309	2e-05	4	451	50152.1	HUMAN	Tubulin alpha-1B chain
[3-1]	1	Q71U36	TBA1A_HUMAN	13	33.7	9.97	7.4e-18	1004.45	2	300074	1.1	PSDK	TIGGGDDSFNTFFSETGAGK			Q20170801-09	184.229	41	7.4e-18	5	451	50136.1	HUMAN	Tubulin alpha-1A chain
[3-1]	1	Q71U36	TBA1A_HUMAN	13	33.7	9.97	7.4e-18	833.064	3	244349	1.5	PSDK	TIGGGDDSFNTFFSETGAGKHVPR			Q20170801-09	169.82	41	1.2e-14	5	451	50136.1	HUMAN	Tubulin alpha-1A chain
[3-1]	1	Q71U36	TBA1A_HUMAN	13	33.7	9.97	7.4e-18	805.74	3	69914	0.5	GTYR	QLFHPEQLITGKEDAANNYAR			Q20170801-09	158.638	85	1.4e-10	6	451	50136.1	HUMAN	Tubulin alpha-1A chain
[3-1]	1	Q71U36	TBA1A_HUMAN	13	33.7	9.97	7.4e-18	834.95	2	237601	-1.7	FKVG	INYQPPTVVPGGDLAK			Q20170801-07	161.49	355	1.5e-10	7	451	50136.1	HUMAN	Tubulin alpha-1A chain
[3-1]	1	Q71U36	TBA1A_HUMAN	13	33.7	9.97	7.4e-18	799.888	2	434904	0.66	KTKR	TIQFVDWCPTGFK	Carbamidomethyl@8		Q20170801-09	191.744	340	9.2e-10	5	451	50136.1	HUMAN	Tubulin alpha-1A chain
[3-1]	1	Q71U36	TBA1A_HUMAN	13	33.7	9.97	7.4e-18	647.799	2	229164	-0.76	EITN	ACFEPANQMVK	Carbamidomethyl@2		Q20170801-09	110.123	294	2.2e-09	6	451	50136.1	HUMAN	Tubulin alpha-1A chain
[3-1]	1	Q71U36	TBA1A_HUMAN	13	33.7	9.97	7.4e-18	654.807	2	452134	-0.64	ITNA	CFEPANQMVK	Carbamidomethyl@1	Abu@N-term	Q20170801-07	120.373	295	1.2e-08	6	451	50136.1	HUMAN	Tubulin alpha-1A chain
[3-1]	1	Q71U36	TBA1A_HUMAN	13	33.7	9.97	7.4e-18	688.352	2	49570	0.2	VCML	SNTTAIAEAWAR		Abu@N-term	Q20170801-07	145.181	379	5.5e-08	6	451	50136.1	HUMAN	Tubulin alpha-1A chain
[3-1]	1	Q71U36	TBA1A_HUMAN	13	33.7	9.97	7.4e-18	586.325	3	195449	-1.4	PYPR	IHFPLATYAPVISAEK			Q20170801-09	184.158	265	1.9e-07	6	451	50136.1	HUMAN	Tubulin alpha-1A chain
[3-1]	1	Q71U36	TBA1A_HUMAN	13	33.7	9.97	7.4e-18	851.456	2	117203	-1.2	HVPR	AVFVDLEPTVIDEVR			Q20170801-09	194.255	65	1.4e-06	3	451	50136.1	HUMAN	Tubulin alpha-1A chain
[3-1]	1	Q71U36	TBA1A_HUMAN	13	33.7	9.97	7.4e-18	912.995	2	239001	-1.9	TGFK	VGINYQPPTVVPGGDLAK			Q20170801-09	172.064	353	4.2e-06	7	451	50136.1	HUMAN	Tubulin alpha-1A chain
[3-1]	1	Q71U36	TBA1A_HUMAN	13	33.7	9.97	7.4e-18	508.293	2	283832	-0.15	VVPK	DVNAAIATIK			Q20170801-09	124.982	327	7.3e-06	5	451	50136.1	HUMAN	Tubulin alpha-1A chain
[3-1]	1	Q71U36	TBA1A_HUMAN	13	33.7	9.97	7.4e-18	524.581	3	879486	0.53	CDPR	HGKYMACCLLYR	Carbamidomethyl@7;Carbamidomethyl@8		Q20170801-09	119.446	309	2e-05	4	451	50136.1	HUMAN	Tubulin alpha-1A chain
[3-2]	1	Q9BQE3	TBA1C_HUMAN	12	31.2	9.97	7.4e-18	1004.45	2	300074	1.1	PSDK	TIGGGDDSFNTFFSETGAGK			Q20170801-09	184.229	41	7.4e-18	5	449	49895.8	HUMAN	Tubulin alpha-1C chain
[3-2]	1	Q9BQE3	TBA1C_HUMAN	12	31.2	9.97	7.4e-18	833.064	3	244349	1.5	PSDK	TIGGGDDSFNTFFSETGAGKHVPR			Q20170801-09	169.82	41	1.2e-14	5	449	49895.8	HUMAN	Tubulin alpha-1C chain
[3-2]	1	Q9BQE3	TBA1C_HUMAN	12	31.2	9.97	7.4e-18	805.74	3	69914	0.5	GTYR	QLFHPEQLITGKEDAANNYAR			Q20170801-09	158.638	85	1.4e-10	6	449	49895.8	HUMAN	Tubulin alpha-1C chain
[3-2]	1	Q9BQE3	TBA1C_HUMAN	12	31.2	9.97	7.4e-18	834.95	2	237601	-1.7	FKVG	INYQPPTVVPGGDLAK			Q20170801-07	161.49	355	1.5e-10	7	449	49895.8	HUMAN	Tubulin alpha-1C chain
[3-2]	1	Q9BQE3	TBA1C_HUMAN	12	31.2	9.97	7.4e-18	799.888	2	434904	0.66	KTKR	TIQFVDWCPTGFK	Carbamidomethyl@8		Q20170801-09	191.744	340	9.2e-10	5	449	49895.8	HUMAN	Tubulin alpha-1C chain
[3-2]	1	Q9BQE3	TBA1C_HUMAN	12	31.2	9.97	7.4e-18	647.799	2	229164	-0.76	EITN	ACFEPANQMVK	Carbamidomethyl@2		Q20170801-09	110.123	294	2.2e-09	6	449	49895.8	HUMAN	Tubulin alpha-1C chain
[3-2]	1	Q9BQE3	TBA1C_HUMAN	12	31.2	9.97	7.4e-18	654.807	2	452134	-0.64	ITNA	CFEPANQMVK	Carbamidomethyl@1	Abu@N-term	Q20170801-07	120.373	295	1.2e-08	6	449	49895.8	HUMAN	Tubulin alpha-1C chain
[3-2]	1	Q9BQE3	TBA1C_HUMAN	12	31.2	9.97	7.4e-18	586.325	3	195449	-1.4	PYPR	IHFPLATYAPVISAEK			Q20170801-09	184.158	265	1.9e-07	6	449	49895.8	HUMAN	Tubulin alpha-1C chain
[3-2]	1	Q9BQE3	TBA1C_HUMAN	12	31.2	9.97	7.4e-18	851.456	2	117203	-1.2	HVPR	AVFVDLEPTVIDEVR			Q20170801-09	194.255	65	1.4e-06	3	449	49895.8	HUMAN	Tubulin alpha-1C chain
[3-2]	1	Q9BQE3	TBA1C_HUMAN	12	31.2	9.97	7.4e-18	912.995	2	239001	-1.9	TGFK	VGINYQPPTVVPGGDLAK			Q20170801-09	172.064	353	4.2e-06	7	449	49895.8	HUMAN	Tubulin alpha-1C chain
[3-2]	1	Q9BQE3	TBA1C_HUMAN	12	31.2	9.97	7.4e-18	508.293	2	283832	-0.15	VVPK	DVNAAIATIK			Q20170801-09	124.982	327	7.3e-06	5	449	49895.8	HUMAN	Tubulin alpha-1C chain
[3-2]	1	Q9BQE3	TBA1C_HUMAN	12	31.2	9.97	7.4e-18	524.581	3	879486	0.53	CDPR	HGKYMACCLLYR	Carbamidomethyl@7;Carbamidomethyl@8		Q20170801-09	119.446	309	2e-05	4	449	49895.8	HUMAN	Tubulin alpha-1C chain
[3-3]	1	Q13748	TBA3C_HUMAN	11	27.8	9.97	7.4e-18	1004.45	2	300074	1.1	PSDK	TIGGGDDSFNTFFSETGAGK			Q20170801-09	184.229	41	7.4e-18	5	450	49960	HUMAN	Tubulin alpha-3C/D chain
[3-3]	1	Q13748	TBA3C_HUMAN	11	27.8	9.97	7.4e-18	833.064	3	244349	1.5	PSDK	TIGGGDDSFNTFFSETGAGKHVPR			Q20170801-09	169.82	41	1.2e-14	5	450	49960	HUMAN	Tubulin alpha-3C/D chain
[3-3]	1	Q13748	TBA3C_HUMAN	11	27.8	9.97	7.4e-18	805.74	3	69914	0.5	GTYR	QLFHPEQLITGKEDAANNYAR			Q20170801-09	158.638	85	1.4e-10	6	450	49960	HUMAN	Tubulin alpha-3C/D chain
[3-3]	1	Q13748	TBA3C_HUMAN	11	27.8	9.97	7.4e-18	834.95	2	237601	-1.7	FKVG	INYQPPTVVPGGDLAK			Q20170801-07	161.49	355	1.5e-10	7	450	49960	HUMAN	Tubulin alpha-3C/D chain
[3-3]	1	Q13748	TBA3C_HUMAN	11	27.8	9.97	7.4e-18	799.888	2	434904	0.66	KTKR	TIQFVDWCPTGFK	Carbamidomethyl@8		Q20170801-09	191.744	340	9.2e-10	5	450	49960	HUMAN	Tubulin alpha-3C/D chain
[3-3]	1	Q13748	TBA3C_HUMAN	11	27.8	9.97	7.4e-18	647.799	2	229164	-0.76	EITN	ACFEPANQMVK	Carbamidomethyl@2		Q20170801-09	110.123	294	2.2e-09	6	450	49960	HUMAN	Tubulin alpha-3C/D chain
[3-3]	1	Q13748	TBA3C_HUMAN	11	27.8	9.97	7.4e-18	654.807	2	452134	-0.64	ITNA	CFEPANQMVK	Carbamidomethyl@1	Abu@N-term	Q20170801-07	120.373	295	1.2e-08	6	450	49960	HUMAN	Tubulin alpha-3C/D chain
[3-3]	1	Q13748	TBA3C_HUMAN	11	27.8	9.97	7.4e-18	688.352	2	49570	0.2	VCML	SNTTAIAEAWAR		Abu@N-term	Q20170801-07	145.181	379	5.5e-08	6	450	49960	HUMAN	Tubulin alpha-3C/D chain
[3-3]	1	Q13748	TBA3C_HUMAN	11	27.8	9.97	7.4e-18	586.325	3	195449	-1.4	PYPR	IHFPLATYAPVISAEK			Q20170801-09	184.158	265	1.9e-07	6	450	49960	HUMAN	Tubulin alpha-3C/D chain
[3-3]	1	Q13748	TBA3C_HUMAN	11	27.8	9.97	7.4e-18	912.995	2	239001	-1.9	TGFK	VGINYQPPTVVPGGDLAK			Q20170801-09	172.064	353	4.2e-06	7	450	49960	HUMAN	Tubulin alpha-3C/D chain
[3-3]	1	Q13748	TBA3C_HUMAN	11	27.8	9.97	7.4e-18	508.293	2	283832	-0.15	VVPK	DVNAAIATIK			Q20170801-09	124.982	327	7.3e-06	5	450	49960	HUMAN	Tubulin alpha-3C/D chain
[3-4]	1	Q6PEY2	TBA3E_HUMAN	10	23.1	9.97	7.4e-18	1004.45	2	300074	1.1	PSDK	TIGGGDDSFNTFFSETGAGK			Q20170801-09	184.229	41	7.4e-18	5	450	49859	HUMAN	Tubulin alpha-3E chain
[3-4]	1	Q6PEY2	TBA3E_HUMAN	10	23.1	9.97	7.4e-18	833.064	3	244349	1.5	PSDK	TIGGGDDSFNTFFSETGAGKHVPR			Q20170801-09	169.82	41	1.2e-14	5	450	49859	HUMAN	Tubulin alpha-3E chain
[3-4]	1	Q6PEY2	TBA3E_HUMAN	10	23.1	9.97	7.4e-18	834.95	2	237601	-1.7	FKVG	INYQPPTVVPGGDLAK			Q20170801-07	161.49	355	1.5e-10	7	450	49859	HUMAN	Tubulin alpha-3E chain
[3-4]	1	Q6PEY2	TBA3E_HUMAN	10	23.1	9.97	7.4e-18	799.888	2	434904	0.66	KTKR	TIQFVDWCPTGFK	Carbamidomethyl@8		Q20170801-09	191.744	340	9.2e-10	5	450	49859	HUMAN	Tubulin alpha-3E chain
[3-4]	1	Q6PEY2	TBA3E_HUMAN	10	23.1	9.97	7.4e-18	647.799	2	229164	-0.76	EITN	ACFEPANQMVK	Carbamidomethyl@2		Q20170801-09	110.123	294	2.2e-09	6	450	49859	HUMAN	Tubulin alpha-3E chain
[3-4]	1	Q6PEY2	TBA3E_HUMAN	10	23.1	9.97	7.4e-18	654.807	2	452134	-0.64	ITNA	CFEPANQMVK	Carbamidomethyl@1	Abu@N-term	Q20170801-07	120.373	295	1.2e-08	6	450	49859	HUMAN	Tubulin alpha-3E chain
[3-4]	1	Q6PEY2	TBA3E_HUMAN	10	23.1	9.97	7.4e-18	688.352	2	49570	0.2	VCML	SNTTAIAEAWAR		Abu@N-term	Q20170801-07	145.181	379	5.5e-08	6	450	49859	HUMAN	Tubulin alpha-3E chain
[3-4]	1	Q6PEY2	TBA3E_HUMAN	10	23.1	9.97	7.4e-18	586.325	3	195449	-1.4	PYPR	IHFPLATYAPVISAEK			Q20170801-09	184.158	265	1.9e-07	6	450	49859	HUMAN	Tubulin alpha-3E chain
[3-4]	1	Q6PEY2	TBA3E_HUMAN	10	23.1	9.97	7.4e-18	912.995	2	239001	-1.9	TGFK	VGINYQPPTVVPGGDLAK			Q20170801-09	172.064	353	4.2e-06	7	450	49859	HUMAN	Tubulin alpha-3E chain
[3-4]	1	Q6PEY2	TBA3E_HUMAN	10	23.1	9.97	7.4e-18	508.293	2	283832	-0.15	VVPK	DVNAAIATIK			Q20170801-09	124.982	327	7.3e-06	5	450	49859	HUMAN	Tubulin alpha-3E chain
[3-5]	1	Q9NY65	TBA8_HUMAN	5	14.3	6.03	1.4e-10	805.74	3	69914	0.5	GTYR	QLFHPEQLITGKEDAANNYAR			Q20170801-09	158.638	85	1.4e-10	6	449	50094	HUMAN	Tubulin alpha-8 chain
[3-5]	1	Q9NY65	TBA8_HUMAN	5	14.3	6.03	1.4e-10	834.95	2	237601	-1.7	FKVG	INYQPPTVVPGGDLAK			Q20170801-07	161.49	355	1.5e-10	7	449	50094	HUMAN	Tubulin alpha-8 chain
[3-5]	1	Q9NY65	TBA8_HUMAN	5	14.3	6.03	1.4e-10	799.888	2	434904	0.66	KTKR	TIQFVDWCPTGFK	Carbamidomethyl@8		Q20170801-09	191.744	340	9.2e-10	5	449	50094	HUMAN	Tubulin alpha-8 chain
[3-5]	1	Q9NY65	TBA8_HUMAN	5	14.3	6.03	1.4e-10	688.352	2	49570	0.2	VCML	SNTTAIAEAWAR		Abu@N-term	Q20170801-07	145.181	379	5.5e-08	6	449	50094	HUMAN	Tubulin alpha-8 chain
[3-5]	1	Q9NY65	TBA8_HUMAN	5	14.3	6.03	1.4e-10	912.995	2	239001	-1.9	TGFK	VGINYQPPTVVPGGDLAK			Q20170801-09	172.064	353	4.2e-06	7	449	50094	HUMAN	Tubulin alpha-8 chain
[4]		P08670	VIME_HUMAN	18	18.7	6.34	3.9e-11	713.87	2	677339	0.74	TSRS	LYASSPGGVYATR		Abu@N-term	Q20170801-07	122.39	52	3.9e-11	1	466	53652.1	HUMAN	Vimentin
[4]		P08670	VIME_HUMAN	18	18.7	6.34	3.9e-11	529.938	3	2110000	0.81	KNTR	TNEKVELQELNDR			Q20170801-09	100.439	101	3.9e-10	2	466	53652.1	HUMAN	Vimentin
[4]		P08670	VIME_HUMAN	18	18.7	6.34	3.9e-11	714.859	2	256223	-0.83	STSR	SLYASSPGGVYATR			Q20170801-07	121.117	51	4e-10	1	466	53652.1	HUMAN	Vimentin
[4]		P08670	VIME_HUMAN	18	18.7	6.34	3.9e-11	657.327	2	77743	-1.4	SRSL	YASSPGGVYATR		Abu@N-term	Q20170801-07	89.1188	53	1.3e-09	1	466	53652.1	HUMAN	Vimentin
[4]		P08670	VIME_HUMAN	18	18.7	6.34	3.9e-11	757.388	2	189084	2.6	STSR	SLYASSPGGVYATR		Abu@N-term	Q20170801-09	130.297	51	5.3e-09	1	466	53652.1	HUMAN	Vimentin
[4]		P08670	VIME_HUMAN	18	18.7	6.34	3.9e-11	499.267	3	4160000	-0.69	TSTR	TYSLGSALRPSTSR			Q20170801-09	116.243	37	1.2e-08	1	466	53652.1	HUMAN	Vimentin
[4]		P08670	VIME_HUMAN	18	18.7	6.34	3.9e-11	575.796	2	345662	-0.34	RSLY	ASSPGGVYATR		Abu@N-term	Q20170801-07	60.8612	54	4.2e-08	1	466	53652.1	HUMAN	Vimentin
[4]		P08670	VIME_HUMAN	18	18.7	6.34	3.9e-11	493.936	3	1280000	0.47	STRT	YSLGSALRPSTSR		Abu@N-term	Q20170801-07	120.313	38	5.5e-08	1	466	53652.1	HUMAN	Vimentin
[4]		P08670	VIME_HUMAN	18	18.7	6.34	3.9e-11	540.278	2	136162	1.2	SLYA	SSPGGVYATR		Abu@N-term	Q20170801-09	58.1008	55	2e-07	1	466	53652.1	HUMAN	Vimentin
[4]		P08670	VIME_HUMAN	18	18.7	6.34	3.9e-11	391.912	3	301818	0.11	HSKR	TLLIKTVETR			Q20170801-09	110.17	441	4.9e-07	1	466	53652.1	HUMAN	Vimentin
[4]		P08670	VIME_HUMAN	18	18.7	6.34	3.9e-11	426.898	3	598770	0.019	SLAD	AINTEFKNTR		Abu@N-term	Q20170801-09	74.082	91	1.8e-06	1	466	53652.1	HUMAN	Vimentin
[4]		P08670	VIME_HUMAN	18	18.7	6.34	3.9e-11	456.742	2	3460000	-1.8	SSRS	YVTTSTR		Abu@N-term	Q20170801-07	40.9398	30	4.3e-06	1	466	53652.1	HUMAN	Vimentin
[4]		P08670	VIME_HUMAN	18	18.7	6.34	3.9e-11	465.584	3	690281	0.14	STRT	YSLGSALRPSTSR			Q20170801-09	110.904	38	2.5e-05	1	466	53652.1	HUMAN	Vimentin
[4]		P08670	VIME_HUMAN	18	18.7	6.34	3.9e-11	439.582	3	823945	1.6	TRTY	SLGSALRPSTSR		Abu@N-term	Q20170801-09	90.8341	39	8.1e-05	1	466	53652.1	HUMAN	Vimentin
[4]		P08670	VIME_HUMAN	18	18.7	6.34	3.9e-11	411.231	3	185035	3.3	TRTY	SLGSALRPSTSR			Q20170801-07	77.0304	39	0.00039	1	466	53652.1	HUMAN	Vimentin
[4]		P08670	VIME_HUMAN	18	18.7	6.34	3.9e-11	509.948	3	173254	1.5	EMAR	HLREYQDLLNVK			Q20170801-09	137.183	379	0.0058	4	466	53652.1	HUMAN	Vimentin
[4]		P08670	VIME_HUMAN	18	18.7	6.34	3.9e-11	393.727	2	233525	-0.73	VRLR	SSVPGVR		Abu@N-term	Q20170801-07	46.7324	72	0.014	1	466	53652.1	HUMAN	Vimentin
[4]		P08670	VIME_HUMAN	18	18.7	6.34	3.9e-11	454.246	2	139798	-3.2	SLAD	AINTEFK		Abu@N-term	Q20170801-09	87.6091	91	0.025	1	466	53652.1	HUMAN	Vimentin
[5]		P11142	HSP7C_HUMAN	13	20.7	8.37	7e-15	564.58	3	623983	0.045	FEVK	STAGDTHLGGEDFDNR			Q20170801-09	86.4519	221	7e-15	2	646	70898.7	HUMAN	Heat shock cognate 71 kDa protein
[5]		P11142	HSP7C_HUMAN	13	20.7	8.37	7e-15	991.504	2	595096	1.6	YLGK	TVTNAVVTVPAYFNDSQR			Q20170801-09	173.736	138	2.2e-13	1	646	70898.7	HUMAN	Heat shock cognate 71 kDa protein
[5]		P11142	HSP7C_HUMAN	13	20.7	8.37	7e-15	805.946	2	214149	-0.34	DSQR	QATKDAGTIAGLNVLR		Gln->pyro-Glu@1	Q20170801-09	170.37	156	1.2e-12	1	646	70898.7	HUMAN	Heat shock cognate 71 kDa protein
[5]		P11142	HSP7C_HUMAN	13	20.7	8.37	7e-15	808.898	2	931605	1.2	GETK	SFYPEEVSSMVLTK			Q20170801-09	184.285	113	9.8e-12	1	646	70898.7	HUMAN	Heat shock cognate 71 kDa protein
[5]		P11142	HSP7C_HUMAN	13	20.7	8.37	7e-15	744.354	2	170675	0.021	QGNR	TTPSYVAFTDTER			Q20170801-07	139.267	37	3.8e-11	7	646	70898.7	HUMAN	Heat shock cognate 71 kDa protein
[5]		P11142	HSP7C_HUMAN	13	20.7	8.37	7e-15	551.95	3	276397	1.7	SDMK	HWPFMVVNDAGRPK			Q20170801-09	152.562	89	1.6e-10	1	646	70898.7	HUMAN	Heat shock cognate 71 kDa protein
[5]		P11142	HSP7C_HUMAN	13	20.7	8.37	7e-15	598.789	2	47121	0.72	AVVT	VPAYFNDSQR			Q20170801-07	97.0619	146	2.8e-10	7	646	70898.7	HUMAN	Heat shock cognate 71 kDa protein
[5]		P11142	HSP7C_HUMAN	13	20.7	8.37	7e-15	600.341	2	874188	-0.29	QATK	DAGTIAGLNVLR			Q20170801-07	170.995	160	1.8e-08	1	646	70898.7	HUMAN	Heat shock cognate 71 kDa protein
[5]		P11142	HSP7C_HUMAN	13	20.7	8.37	7e-15	614.818	2	114823	-0.13	QHGK	VEIIANDQGNR			Q20170801-09	73.5968	26	6e-08	8	646	70898.7	HUMAN	Heat shock cognate 71 kDa protein
[5]		P11142	HSP7C_HUMAN	13	20.7	8.37	7e-15	814.46	2	60973	0.45	DSQR	QATKDAGTIAGLNVLR			Q20170801-09	144.848	156	2e-07	1	646	70898.7	HUMAN	Heat shock cognate 71 kDa protein
[5]		P11142	HSP7C_HUMAN	13	20.7	8.37	7e-15	652.301	2	184425	-3.2	VSSK	NSLESYAFNMK			Q20170801-09	157.537	540	2.3e-07	1	646	70898.7	HUMAN	Heat shock cognate 71 kDa protein
[5]		P11142	HSP7C_HUMAN	13	20.7	8.37	7e-15	719.368	3	101790	0.65	QGNR	TTPSYVAFTDTERLIGDAAK			Q20170801-09	187.066	37	8.4e-06	5	646	70898.7	HUMAN	Heat shock cognate 71 kDa protein
[5]		P11142	HSP7C_HUMAN	13	20.7	8.37	7e-15	494.607	3	177336	-1.2	KLDK	SQIHDIVLVGGSTR			Q20170801-09	124.786	329	0.00059	1	646	70898.7	HUMAN	Heat shock cognate 71 kDa protein
[5-1]	7	P0DMV8	HS71A_HUMAN	11	16.8	5.74	3.8e-11	744.354	2	170675	0.021	QGNR	TTPSYVAFTDTER			Q20170801-07	139.267	37	3.8e-11	7	641	70052.8	HUMAN	Heat shock 70 kDa protein 1A
[5-1]	7	P0DMV8	HS71A_HUMAN	11	16.8	5.74	3.8e-11	598.789	2	47121	0.72	AVIT	VPAYFNDSQR			Q20170801-07	97.0619	146	2.8e-10	7	641	70052.8	HUMAN	Heat shock 70 kDa protein 1A
[5-1]	7	P0DMV8	HS71A_HUMAN	11	16.8	5.74	3.8e-11	804.957	2	215137	0.21	DSQR	QATKDAGVIAGLNVLR		Gln->pyro-Glu@1	Q20170801-09	181.608	156	3.7e-10	3	641	70052.8	HUMAN	Heat shock 70 kDa protein 1A
[5-1]	7	P0DMV8	HS71A_HUMAN	11	16.8	5.74	3.8e-11	560.955	3	662025	0.9	SDMK	HWPFQVINDGDKPK			Q20170801-09	144.896	89	1.6e-09	2	641	70052.8	HUMAN	Heat shock 70 kDa protein 1A
[5-1]	7	P0DMV8	HS71A_HUMAN	11	16.8	5.74	3.8e-11	807.908	2	135214	-0.4	GETK	AFYPEEISSMVLTK			Q20170801-09	192.168	113	8.6e-09	3	641	70052.8	HUMAN	Heat shock 70 kDa protein 1A
[5-1]	7	P0DMV8	HS71A_HUMAN	11	16.8	5.74	3.8e-11	813.471	2	101265	1.2	DSQR	QATKDAGVIAGLNVLR			Q20170801-09	160.024	156	9e-09	3	641	70052.8	HUMAN	Heat shock 70 kDa protein 1A
[5-1]	7	P0DMV8	HS71A_HUMAN	11	16.8	5.74	3.8e-11	614.818	2	114823	-0.13	QHGK	VEIIANDQGNR			Q20170801-09	73.5968	26	6e-08	8	641	70052.8	HUMAN	Heat shock 70 kDa protein 1A
[5-1]	7	P0DMV8	HS71A_HUMAN	11	16.8	5.74	3.8e-11	829.929	2	71977	1.2	DAAK	NQVALNPQNTVFDAK			Q20170801-09	148.67	57	1.2e-06	2	641	70052.8	HUMAN	Heat shock 70 kDa protein 1A
[5-1]	7	P0DMV8	HS71A_HUMAN	11	16.8	5.74	3.8e-11	599.351	2	2580000	-0.092	QATK	DAGVIAGLNVLR			Q20170801-09	181.373	160	2e-06	3	641	70052.8	HUMAN	Heat shock 70 kDa protein 1A
[5-1]	7	P0DMV8	HS71A_HUMAN	11	16.8	5.74	3.8e-11	719.368	3	101790	0.65	QGNR	TTPSYVAFTDTERLIGDAAK			Q20170801-09	187.066	37	8.4e-06	5	641	70052.8	HUMAN	Heat shock 70 kDa protein 1A
[5-1]	7	P0DMV8	HS71A_HUMAN	11	16.8	5.74	3.8e-11	451.745	2	114345	-0.9	DLFR	STLEPVEK			Q20170801-07	51.7843	312	0.00032	4	641	70052.8	HUMAN	Heat shock 70 kDa protein 1A
[5-2]	7	P0DMV9	HS71B_HUMAN	11	16.8	5.74	3.8e-11	744.354	2	170675	0.021	QGNR	TTPSYVAFTDTER			Q20170801-07	139.267	37	3.8e-11	7	641	70052.8	HUMAN	Heat shock 70 kDa protein 1B
[5-2]	7	P0DMV9	HS71B_HUMAN	11	16.8	5.74	3.8e-11	598.789	2	47121	0.72	AVIT	VPAYFNDSQR			Q20170801-07	97.0619	146	2.8e-10	7	641	70052.8	HUMAN	Heat shock 70 kDa protein 1B
[5-2]	7	P0DMV9	HS71B_HUMAN	11	16.8	5.74	3.8e-11	804.957	2	215137	0.21	DSQR	QATKDAGVIAGLNVLR		Gln->pyro-Glu@1	Q20170801-09	181.608	156	3.7e-10	3	641	70052.8	HUMAN	Heat shock 70 kDa protein 1B
[5-2]	7	P0DMV9	HS71B_HUMAN	11	16.8	5.74	3.8e-11	560.955	3	662025	0.9	SDMK	HWPFQVINDGDKPK			Q20170801-09	144.896	89	1.6e-09	2	641	70052.8	HUMAN	Heat shock 70 kDa protein 1B
[5-2]	7	P0DMV9	HS71B_HUMAN	11	16.8	5.74	3.8e-11	807.908	2	135214	-0.4	GETK	AFYPEEISSMVLTK			Q20170801-09	192.168	113	8.6e-09	3	641	70052.8	HUMAN	Heat shock 70 kDa protein 1B
[5-2]	7	P0DMV9	HS71B_HUMAN	11	16.8	5.74	3.8e-11	813.471	2	101265	1.2	DSQR	QATKDAGVIAGLNVLR			Q20170801-09	160.024	156	9e-09	3	641	70052.8	HUMAN	Heat shock 70 kDa protein 1B
[5-2]	7	P0DMV9	HS71B_HUMAN	11	16.8	5.74	3.8e-11	614.818	2	114823	-0.13	QHGK	VEIIANDQGNR			Q20170801-09	73.5968	26	6e-08	8	641	70052.8	HUMAN	Heat shock 70 kDa protein 1B
[5-2]	7	P0DMV9	HS71B_HUMAN	11	16.8	5.74	3.8e-11	829.929	2	71977	1.2	DAAK	NQVALNPQNTVFDAK			Q20170801-09	148.67	57	1.2e-06	2	641	70052.8	HUMAN	Heat shock 70 kDa protein 1B
[5-2]	7	P0DMV9	HS71B_HUMAN	11	16.8	5.74	3.8e-11	599.351	2	2580000	-0.092	QATK	DAGVIAGLNVLR			Q20170801-09	181.373	160	2e-06	3	641	70052.8	HUMAN	Heat shock 70 kDa protein 1B
[5-2]	7	P0DMV9	HS71B_HUMAN	11	16.8	5.74	3.8e-11	719.368	3	101790	0.65	QGNR	TTPSYVAFTDTERLIGDAAK			Q20170801-09	187.066	37	8.4e-06	5	641	70052.8	HUMAN	Heat shock 70 kDa protein 1B
[5-2]	7	P0DMV9	HS71B_HUMAN	11	16.8	5.74	3.8e-11	451.745	2	114345	-0.9	DLFR	STLEPVEK			Q20170801-07	51.7843	312	0.00032	4	641	70052.8	HUMAN	Heat shock 70 kDa protein 1B
[5-3]	4	P34931	HS71L_HUMAN	8	11.1	5.74	3.8e-11	744.354	2	170675	0.021	QGNR	TTPSYVAFTDTER			Q20170801-07	139.267	39	3.8e-11	7	641	70375.6	HUMAN	Heat shock 70 kDa protein 1-like
[5-3]	4	P34931	HS71L_HUMAN	8	11.1	5.74	3.8e-11	598.789	2	47121	0.72	AVIT	VPAYFNDSQR			Q20170801-07	97.0619	148	2.8e-10	7	641	70375.6	HUMAN	Heat shock 70 kDa protein 1-like
[5-3]	4	P34931	HS71L_HUMAN	8	11.1	5.74	3.8e-11	804.957	2	215137	0.21	DSQR	QATKDAGVIAGLNVLR		Gln->pyro-Glu@1	Q20170801-09	181.608	158	3.7e-10	3	641	70375.6	HUMAN	Heat shock 70 kDa protein 1-like
[5-3]	4	P34931	HS71L_HUMAN	8	11.1	5.74	3.8e-11	807.908	2	135214	-0.4	GENK	AFYPEEISSMVLTK			Q20170801-09	192.168	115	8.6e-09	3	641	70375.6	HUMAN	Heat shock 70 kDa protein 1-like
[5-3]	4	P34931	HS71L_HUMAN	8	11.1	5.74	3.8e-11	813.471	2	101265	1.2	DSQR	QATKDAGVIAGLNVLR			Q20170801-09	160.024	158	9e-09	3	641	70375.6	HUMAN	Heat shock 70 kDa protein 1-like
[5-3]	4	P34931	HS71L_HUMAN	8	11.1	5.74	3.8e-11	614.818	2	114823	-0.13	QHGK	VEIIANDQGNR			Q20170801-09	73.5968	28	6e-08	8	641	70375.6	HUMAN	Heat shock 70 kDa protein 1-like
[5-3]	4	P34931	HS71L_HUMAN	8	11.1	5.74	3.8e-11	599.351	2	2580000	-0.092	QATK	DAGVIAGLNVLR			Q20170801-09	181.373	162	2e-06	3	641	70375.6	HUMAN	Heat shock 70 kDa protein 1-like
[5-3]	4	P34931	HS71L_HUMAN	8	11.1	5.74	3.8e-11	719.368	3	101790	0.65	QGNR	TTPSYVAFTDTERLIGDAAK			Q20170801-09	187.066	39	8.4e-06	5	641	70375.6	HUMAN	Heat shock 70 kDa protein 1-like
[5-4]	1	P17066	HSP76_HUMAN	4	6.5	5.73	3.8e-11	744.354	2	170675	0.021	QGNR	TTPSYVAFTDTER			Q20170801-07	139.267	39	3.8e-11	7	643	71028.7	HUMAN	Heat shock 70 kDa protein 6
[5-4]	1	P17066	HSP76_HUMAN	4	6.5	5.73	3.8e-11	598.789	2	47121	0.72	AVIT	VPAYFNDSQR			Q20170801-07	97.0619	148	2.8e-10	7	643	71028.7	HUMAN	Heat shock 70 kDa protein 6
[5-4]	1	P17066	HSP76_HUMAN	4	6.5	5.73	3.8e-11	614.818	2	114823	-0.13	QQGR	VEILANDQGNR			Q20170801-09	73.5968	28	6e-08	8	643	71028.7	HUMAN	Heat shock 70 kDa protein 6
[5-4]	1	P17066	HSP76_HUMAN	4	6.5	5.73	3.8e-11	451.745	2	114345	-0.9	DLFR	STLEPVEK			Q20170801-07	51.7843	314	0.00032	4	643	71028.7	HUMAN	Heat shock 70 kDa protein 6
[5-5]	2	P11021	GRP78_HUMAN	3	5.7	6.39	3.2e-11	715.85	2	424140	0.8	LIGR	TWNDPSVQQDIK			Q20170801-07	122.737	102	3.2e-11	1	654	72333.5	HUMAN	78 kDa glucose-regulated protein
[5-5]	2	P11021	GRP78_HUMAN	3	5.7	6.39	3.2e-11	768.904	2	434380	1.7	GQTK	TFAPEEISAMVLTK			Q20170801-09	191.571	139	2.5e-09	1	654	72333.5	HUMAN	78 kDa glucose-regulated protein
[5-5]	2	P11021	GRP78_HUMAN	3	5.7	6.39	3.2e-11	614.818	2	114823	-0.13	KNGR	VEIIANDQGNR			Q20170801-09	73.5968	50	6e-08	8	654	72333.5	HUMAN	78 kDa glucose-regulated protein
[5-6]	1	P48741	HSP77_HUMAN	3	8.7	5.73	3.8e-11	744.354	2	170675	0.021	QGNR	TTPSYVAFTDTER			Q20170801-07	139.267	39	3.8e-11	7	367	40244.8	HUMAN	Putative heat shock 70 kDa protein 7
[5-6]	1	P48741	HSP77_HUMAN	3	8.7	5.73	3.8e-11	614.818	2	114823	-0.13	QQGR	VEILANDQGNR			Q20170801-09	73.5968	28	6e-08	8	367	40244.8	HUMAN	Putative heat shock 70 kDa protein 7
[5-6]	1	P48741	HSP77_HUMAN	3	8.7	5.73	3.8e-11	451.745	2	114345	-0.9	DLFR	STLEPVEK			Q20170801-07	51.7843	314	0.00032	4	367	40244.8	HUMAN	Putative heat shock 70 kDa protein 7
[5-7]	1	P38646	GRP75_HUMAN	2	3.2	3.91	8.1e-10	598.788	2	111300	-0.73	AVIT	VPAYFNDSQR			Q20170801-09	94.9938	193	8.1e-10	7	679	73681.1	HUMAN	Stress-70 protein, mitochondrial
[5-7]	1	P38646	GRP75_HUMAN	2	3.2	3.91	8.1e-10	621.844	2	322520	1.1	QATK	DAGQISGLNVLR			Q20170801-09	158.881	207	8.1e-06	1	679	73681.1	HUMAN	Stress-70 protein, mitochondrial
[6]		P14618	KPYM_HUMAN	15	24.5	10.48	8.6e-19	1006.54	3	755488	0.24	KNVR	TATESFASDPILYRPVAVALDTKGPEIR			Q20170801-09	190.05	93	8.6e-19	1	531	57937.4	HUMAN	Pyruvate kinase PKM
[6]		P14618	KPYM_HUMAN	15	24.5	10.48	8.6e-19	822.435	3	234882	-0.36	KNVR	TATESFASDPILYRPVAVALDTK			Q20170801-09	191.109	93	1.6e-12	1	531	57937.4	HUMAN	Pyruvate kinase PKM
[6]		P14618	KPYM_HUMAN	15	24.5	10.48	8.6e-19	503.296	3	322509	1.1	YRPR	APIIAVTRNPQTAR			Q20170801-09	96.071	448	2.1e-09	1	531	57937.4	HUMAN	Pyruvate kinase PKM
[6]		P14618	KPYM_HUMAN	15	24.5	10.48	8.6e-19	611.321	2	325548	1.3	ASFK	CCSGAIIVLTK	Carbamidomethyl@1;Carbamidomethyl@2		Q20170801-09	131.363	423	2.2e-09	1	531	57937.4	HUMAN	Pyruvate kinase PKM
[6]		P14618	KPYM_HUMAN	15	24.5	10.48	8.6e-19	544.317	3	486166	0.21	PEIR	TGLIKGSGTAEVELKK			Q20170801-09	95.4769	121	5.5e-09	1	531	57937.4	HUMAN	Pyruvate kinase PKM
[6]		P14618	KPYM_HUMAN	15	24.5	10.48	8.6e-19	680.355	2	854429	-1.8	ITAR	NTGIICTIGPASR	Carbamidomethyl@6		Q20170801-09	129.277	44	9.6e-09	1	531	57937.4	HUMAN	Pyruvate kinase PKM
[6]		P14618	KPYM_HUMAN	15	24.5	10.48	8.6e-19	393.221	3	1880000	-1.4	PASR	SVETLKEMIK			Q20170801-09	123.046	57	5.7e-08	1	531	57937.4	HUMAN	Pyruvate kinase PKM
[6]		P14618	KPYM_HUMAN	15	24.5	10.48	8.6e-19	520.804	4	187665	1.9	QVAR	YRPRAPIIAVTRNPQTAR			Q20170801-09	108.813	444	1.1e-07	1	531	57937.4	HUMAN	Pyruvate kinase PKM
[6]		P14618	KPYM_HUMAN	15	24.5	10.48	8.6e-19	471.621	3	234625	0.85	QVAR	YRPRAPIIAVTR			Q20170801-09	109.555	444	1.8e-06	1	531	57937.4	HUMAN	Pyruvate kinase PKM
[6]		P14618	KPYM_HUMAN	15	24.5	10.48	8.6e-19	400.231	3	291911	0.28	RPVA	VALDTKGPEIR			Q20170801-07	95.5383	110	3.8e-06	1	531	57937.4	HUMAN	Pyruvate kinase PKM
[6]		P14618	KPYM_HUMAN	15	24.5	10.48	8.6e-19	599.293	2	214789	-2.1	ATLK	ITLDNAYMEK			Q20170801-09	127.388	142	2.8e-05	1	531	57937.4	HUMAN	Pyruvate kinase PKM
[6]		P14618	KPYM_HUMAN	15	24.5	10.48	8.6e-19	599.329	2	384297	2.7	HMCR	LDIDSPPITAR			Q20170801-09	140.728	33	3.7e-05	1	531	57937.4	HUMAN	Pyruvate kinase PKM
[6]		P14618	KPYM_HUMAN	15	24.5	10.48	8.6e-19	501.62	3	198347	1.2	PEIR	TGLIKGSGTAEVELK			Q20170801-09	115.176	121	0.00023	1	531	57937.4	HUMAN	Pyruvate kinase PKM
[6]		P14618	KPYM_HUMAN	15	24.5	10.48	8.6e-19	367.683	2	33048	-2.3	EMIK	SGMNVAR			Q20170801-09	23.3275	67	0.00057	1	531	57937.4	HUMAN	Pyruvate kinase PKM
[6]		P14618	KPYM_HUMAN	15	24.5	10.48	8.6e-19	353.218	2	147069	-0.083	PAEK	VFLAQK			Q20170801-09	58.1072	306	0.0021	5	531	57937.4	HUMAN	Pyruvate kinase PKM
[7]		P78527	PRKDC_HUMAN	14	3.9	7.33	5.8e-13	1075.01	2	78880	-2.9	ITAQ	SIEELCAVNLYGPDAQVDR	Carbamidomethyl@6		Q20170801-09	180.52	1427	5.8e-13	1	4128	469093	HUMAN	DNA-dependent protein kinase catalytic subunit
[7]		P78527	PRKDC_HUMAN	14	3.9	7.33	5.8e-13	703.346	3	320938	-0.26	GYLK	TSALSDETKNNWEVSALSR			Q20170801-09	152.19	802	6.7e-13	1	4128	469093	HUMAN	DNA-dependent protein kinase catalytic subunit
[7]		P78527	PRKDC_HUMAN	14	3.9	7.33	5.8e-13	611.255	2	3840000	-0.57	ILGR	TWEGWEPWM			Q20170801-09	205.732	4120	1.7e-11	1	4128	469093	HUMAN	DNA-dependent protein kinase catalytic subunit
[7]		P78527	PRKDC_HUMAN	14	3.9	7.33	5.8e-13	682.977	3	104861	0.66	ADEK	SLGTIQQCCDAIDHLCR	Carbamidomethyl@8;Carbamidomethyl@9;Carbamidomethyl@16		Q20170801-09	152.571	1120	1.2e-09	1	4128	469093	HUMAN	DNA-dependent protein kinase catalytic subunit
[7]		P78527	PRKDC_HUMAN	14	3.9	7.33	5.8e-13	804.89	2	120742	-0.0021	LKRR	YNFPVEVEVPMER			Q20170801-09	186.133	1988	1.5e-09	1	4128	469093	HUMAN	DNA-dependent protein kinase catalytic subunit
[7]		P78527	PRKDC_HUMAN	14	3.9	7.33	5.8e-13	798.056	3	96265	-1.6	ITAQ	SIEELCAVNLYGPDAQVDRSR	Carbamidomethyl@6		Q20170801-07	171.387	1427	1e-08	1	4128	469093	HUMAN	DNA-dependent protein kinase catalytic subunit
[7]		P78527	PRKDC_HUMAN	14	3.9	7.33	5.8e-13	568.308	2	405103	-0.81	RSYR	HGDLPDIQIK			Q20170801-09	122.282	2777	9e-08	1	4128	469093	HUMAN	DNA-dependent protein kinase catalytic subunit
[7]		P78527	PRKDC_HUMAN	14	3.9	7.33	5.8e-13	884.953	2	138145	1.2	TVLK	TVSLLDENNVSSYLSK			Q20170801-09	181.315	3303	1.1e-07	1	4128	469093	HUMAN	DNA-dependent protein kinase catalytic subunit
[7]		P78527	PRKDC_HUMAN	14	3.9	7.33	5.8e-13	570.79	2	3510000	0.81	LQLR	TYSVVPMTSR			Q20170801-09	113.815	3790	2.8e-07	1	4128	469093	HUMAN	DNA-dependent protein kinase catalytic subunit
[7]		P78527	PRKDC_HUMAN	14	3.9	7.33	5.8e-13	470.74	2	452509	-0.057	GANR	TETVTSFR			Q20170801-09	72.0258	3865	5e-07	1	4128	469093	HUMAN	DNA-dependent protein kinase catalytic subunit
[7]		P78527	PRKDC_HUMAN	14	3.9	7.33	5.8e-13	640.654	3	244404	1	LKTS	ALSDETKNNWEVSALSR			Q20170801-09	148.189	804	9.5e-06	1	4128	469093	HUMAN	DNA-dependent protein kinase catalytic subunit
[7]		P78527	PRKDC_HUMAN	14	3.9	7.33	5.8e-13	526.275	2	877100	0.091	KLYR	SIGEYDVLR			Q20170801-09	135.169	2932	3.2e-05	1	4128	469093	HUMAN	DNA-dependent protein kinase catalytic subunit
[7]		P78527	PRKDC_HUMAN	14	3.9	7.33	5.8e-13	474.741	2	154455	-0.31	LQTR	TQEGSLSAR			Q20170801-09	23.9527	2620	6.5e-05	1	4128	469093	HUMAN	DNA-dependent protein kinase catalytic subunit
[7]		P78527	PRKDC_HUMAN	14	3.9	7.33	5.8e-13	708.033	3	93342	-0.47	INLM	LPMKETGLMYSIMVHALR		Oxidation@3'42;Oxidation@9|13	Q20170801-07	105.254	3972	0.047	1	4128	469093	HUMAN	DNA-dependent protein kinase catalytic subunit
[8]		P35579	MYH9_HUMAN	12	7.8	8.27	1e-14	681.664	3	1500000	-1.9	ILKK	TLEEEAKTHEAQIQEMR			Q20170801-09	128.575	1175	1e-14	1	1960	226534	HUMAN	Myosin-9
[8]		P35579	MYH9_HUMAN	12	7.8	8.27	1e-14	744.372	3	595906	-1.6	EEMK	TQLEELEDELQATEDAKLR			Q20170801-09	189.342	1539	2e-13	3	1960	226534	HUMAN	Myosin-9
[8]		P35579	MYH9_HUMAN	12	7.8	8.27	1e-14	621.799	2	44540	1.3	EEAK	THEAQIQEMR			Q20170801-09	49.6285	1182	5.6e-11	1	1960	226534	HUMAN	Myosin-9
[8]		P35579	MYH9_HUMAN	12	7.8	8.27	1e-14	638.979	3	64972	3.2	GKKR	HEMPPHIYAITDTAYR			Q20170801-09	140.709	144	3.3e-10	1	1960	226534	HUMAN	Myosin-9
[8]		P35579	MYH9_HUMAN	12	7.8	8.27	1e-14	562.252	3	410023	0.94	KQFR	TEMEDLMSSKDDVGK			Q20170801-09	124.253	1504	8.7e-10	1	1960	226534	HUMAN	Myosin-9
[8]		P35579	MYH9_HUMAN	12	7.8	8.27	1e-14	627.548	4	304152	2.1	KQFR	TEMEDLMSSKDDVGKSVHELEK			Q20170801-09	154.24	1504	2e-09	1	1960	226534	HUMAN	Myosin-9
[8]		P35579	MYH9_HUMAN	12	7.8	8.27	1e-14	683.66	3	124968	1.2	KKLK	SMEAEMIQLQEELAAAER			Q20170801-09	203.747	1677	8.3e-09	1	1960	226534	HUMAN	Myosin-9
[8]		P35579	MYH9_HUMAN	12	7.8	8.27	1e-14	666.008	3	285826	-0.13	MRQK	HSQAVEELAEQLEQTKR			Q20170801-09	154.403	1194	8.7e-09	1	1960	226534	HUMAN	Myosin-9
[8]		P35579	MYH9_HUMAN	12	7.8	8.27	1e-14	509.262	2	1030000	1.5	DQLR	CNGVLEGIR	Carbamidomethyl@1		Q20170801-09	102.541	694	2.5e-07	13	1960	226534	HUMAN	Myosin-9
[8]		P35579	MYH9_HUMAN	12	7.8	8.27	1e-14	689.39	2	275944	0.00088	GMFR	TVGQLYKEQLAK			Q20170801-09	98.4598	645	8.4e-07	1	1960	226534	HUMAN	Myosin-9
[8]		P35579	MYH9_HUMAN	12	7.8	8.27	1e-14	808.416	2	91796	3.5	EAMR	IMGIPEEEQMGLLR			Q20170801-09	186.072	328	9.3e-06	1	1960	226534	HUMAN	Myosin-9
[8]		P35579	MYH9_HUMAN	12	7.8	8.27	1e-14	502.785	2	237395	0.27	ERVR	TELADKVTK			Q20170801-09	38.2887	1269	0.001	1	1960	226534	HUMAN	Myosin-9
[8-1]	6	P35580	MYH10_HUMAN	8	4.3	7.58	2e-13	744.372	3	595906	-1.6	EEMR	TQLEELEDELQATEDAKLR			Q20170801-09	189.342	1546	2e-13	3	1976	229001	HUMAN	Myosin-10
[8-1]	6	P35580	MYH10_HUMAN	8	4.3	7.58	2e-13	872.957	2	83200	-1.1	RFRK	TTLQVDTLNAELAAER			Q20170801-09	169.803	1762	5.3e-11	1	1976	229001	HUMAN	Myosin-10
[8-1]	6	P35580	MYH10_HUMAN	8	4.3	7.58	2e-13	570.623	3	328695	2.5	MAQR	TGLEDPERYLFVDR			Q20170801-09	177.277	5	8.6e-10	1	1976	229001	HUMAN	Myosin-10
[8-1]	6	P35580	MYH10_HUMAN	8	4.3	7.58	2e-13	456.257	3	617414	-1.2	GMFR	TVGQLYKESLTK			Q20170801-09	103.031	652	3.3e-08	1	1976	229001	HUMAN	Myosin-10
[8-1]	6	P35580	MYH10_HUMAN	8	4.3	7.58	2e-13	458.722	2	459294	0.22	MAQR	TGLEDPER			Q20170801-09	48.5696	5	4.6e-08	1	1976	229001	HUMAN	Myosin-10
[8-1]	6	P35580	MYH10_HUMAN	8	4.3	7.58	2e-13	509.262	2	1030000	1.5	DQLR	CNGVLEGIR	Carbamidomethyl@1		Q20170801-09	102.541	701	2.5e-07	13	1976	229001	HUMAN	Myosin-10
[8-1]	6	P35580	MYH10_HUMAN	8	4.3	7.58	2e-13	499.741	2	659388	0.61	LKLR	HWQWWR			Q20170801-09	153.746	831	8e-05	2	1976	229001	HUMAN	Myosin-10
[8-1]	6	P35580	MYH10_HUMAN	8	4.3	7.58	2e-13	512.774	2	97107	-1.5	MERK	HQQLLEEK			Q20170801-09	38.394	882	0.049	2	1976	229001	HUMAN	Myosin-10
[8-2]	3	Q7Z406	MYH14_HUMAN	4	1.5	3.18	2.5e-07	509.262	2	1030000	1.5	DQLR	CNGVLEGIR	Carbamidomethyl@1		Q20170801-09	102.541	718	2.5e-07	13	1995	227872	HUMAN	Myosin-14
[8-2]	3	Q7Z406	MYH14_HUMAN	4	1.5	3.18	2.5e-07	499.741	2	659388	0.61	LKLR	HWQWWR			Q20170801-09	153.746	848	8e-05	2	1995	227872	HUMAN	Myosin-14
[8-2]	3	Q7Z406	MYH14_HUMAN	4	1.5	3.18	2.5e-07	351.218	2	64917	-1.8	RKQR	TLAVAAR			Q20170801-09	40.96	1630	0.015	1	1995	227872	HUMAN	Myosin-14
[8-2]	3	Q7Z406	MYH14_HUMAN	4	1.5	3.18	2.5e-07	480.267	2	158677	-3.6	QADF	SVLHYAGK		Abu@N-term	Q20170801-07	51.3254	595	0.02	1	1995	227872	HUMAN	Myosin-14
[8-3]	1	Q9UKX2	MYH2_HUMAN	2	1.5	3.18	2.5e-07	509.262	2	1030000	1.5	HQLR	CNGVLEGIR	Carbamidomethyl@1		Q20170801-09	102.541	701	2.5e-07	13	1941	223046	HUMAN	Myosin-2
[8-3]	1	Q9UKX2	MYH2_HUMAN	2	1.5	3.18	2.5e-07	794.407	3	168336	-1.8	-M	SSDSELAVFGEAAPFLRKSER		Abu@N-term	Q20170801-07	111.449	2	0.01	1	1941	223046	HUMAN	Myosin-2
[9]		P68431	H31_HUMAN	17	49.3	6.48	9.2e-12	511.258	3	1930000	1.1	YLVG	LFEDTNLCAIHAK	Carbamidomethyl@8		Q20170801-07	141.827	104	9.2e-12	3	136	15404.2	HUMAN	Histone H3.1
[9]		P68431	H31_HUMAN	17	49.3	6.48	9.2e-12	422.72	4	976299	-0.69	YLVG	LFEDTNLCAIHAKR	Carbamidomethyl@8		Q20170801-09	124.399	104	1.2e-08	3	136	15404.2	HUMAN	Histone H3.1
[9]		P68431	H31_HUMAN	17	49.3	6.48	9.2e-12	514.306	3	430681	1.9	IHAK	RVTIMPKDIQLAR			Q20170801-09	134.247	117	2.6e-07	5	136	15404.2	HUMAN	Histone H3.1
[9]		P68431	H31_HUMAN	17	49.3	6.48	9.2e-12	462.27	3	2010000	-1.3	HAKR	VTIMPKDIQLAR			Q20170801-09	147.5	118	3.6e-07	5	136	15404.2	HUMAN	Histone H3.1
[9]		P68431	H31_HUMAN	17	49.3	6.48	9.2e-12	385.98	4	186442	-0.92	HAKR	VTIMPKDIQLARR			Q20170801-09	129.359	118	4.2e-07	5	136	15404.2	HUMAN	Histone H3.1
[9]		P68431	H31_HUMAN	17	49.3	6.48	9.2e-12	480.298	2	120953	0.81	RYQK	STELLIRK			Q20170801-09	67.2606	58	2.2e-06	5	136	15404.2	HUMAN	Histone H3.1
[9]		P68431	H31_HUMAN	17	49.3	6.48	9.2e-12	668.349	2	161224	0.17	RLVR	EIAQDFKTDLR			Q20170801-09	117.6	74	7.5e-06	4	136	15404.2	HUMAN	Histone H3.1
[9]		P68431	H31_HUMAN	17	49.3	6.48	9.2e-12	568.652	3	130943	-0.91	PFQR	LVREIAQDFKTDLR			Q20170801-09	154.531	71	1.7e-05	3	136	15404.2	HUMAN	Histone H3.1
[9]		P68431	H31_HUMAN	17	49.3	6.48	9.2e-12	395.566	3	1300000	0.46	KRVT	IMPKDIQLAR			Q20170801-09	113.702	120	9.6e-05	5	136	15404.2	HUMAN	Histone H3.1
[9]		P68431	H31_HUMAN	17	49.3	6.48	9.2e-12	417.575	3	282350	-0.14	EIRR	YQKSTELLIR			Q20170801-07	100.764	55	0.00014	5	136	15404.2	HUMAN	Histone H3.1
[9]		P68431	H31_HUMAN	17	49.3	6.48	9.2e-12	386.249	3	1230000	0.33	LLIR	KLPFQRLVR			Q20170801-09	119.402	65	0.00018	4	136	15404.2	HUMAN	Histone H3.1
[9]		P68431	H31_HUMAN	17	49.3	6.48	9.2e-12	469.607	3	868193	-4.2	REIR	RYQKSTELLIR			Q20170801-09	89.7398	54	0.00021	5	136	15404.2	HUMAN	Histone H3.1
[9]		P68431	H31_HUMAN	17	49.3	6.48	9.2e-12	422.757	2	929159	-0.91	IHAK	RVTIMPK			Q20170801-07	60.6082	117	0.0004	5	136	15404.2	HUMAN	Histone H3.1
[9]		P68431	H31_HUMAN	17	49.3	6.48	9.2e-12	390.92	3	364181	-0.35	STEL	LIRKLPFQR			Q20170801-09	121.355	62	0.0026	5	136	15404.2	HUMAN	Histone H3.1
[9]		P68431	H31_HUMAN	17	49.3	6.48	9.2e-12	416.251	2	2860000	0.66	RYQK	STELLIR			Q20170801-09	102.009	58	0.0043	7	136	15404.2	HUMAN	Histone H3.1
[9]		P68431	H31_HUMAN	17	49.3	6.48	9.2e-12	436.26	2	176069	1.7	IMPK	DIQLARR			Q20170801-07	49.2549	124	0.02	5	136	15404.2	HUMAN	Histone H3.1
[9]		P68431	H31_HUMAN	17	49.3	6.48	9.2e-12	516.801	2	331603	-0.56	KPHR	YRPGTVALR			Q20170801-09	73.464	42	0.022	5	136	15404.2	HUMAN	Histone H3.1
[9-1]	3	decoy	decoy	4	1.9	0.73	0.0018	434.223	2	2200000	-3.6	GNVP	TMAMLIR		Oxidation@2;Oxidation@4	Q20170801-07	119.702	637	0.0018	1	738	79148.4	HUMAN	ATP-binding cassette sub-family B member 10, mitochondrial
[9-1]	3	decoy	decoy	4	1.9	0.73	0.0018	426.226	2	535200	-4.1	GNVP	TMAMLIR		Oxidation@4'22	Q20170801-07	150.829	637	0.0035	1	738	79148.4	HUMAN	ATP-binding cassette sub-family B member 10, mitochondrial
[9-1]	3	decoy	decoy	4	1.9	0.73	0.0018	416.251	2	2860000	0.66	RALS	STEILLR			Q20170801-09	102.009	685	0.0043	7	738	79148.4	HUMAN	ATP-binding cassette sub-family B member 10, mitochondrial
[9-1]	3	decoy	decoy	4	1.9	0.73	0.0018	426.226	2	816885	-4.7	GNVP	TMAMLIR		Oxidation@2'15	Q20170801-09	133.249	637	0.024	1	738	79148.4	HUMAN	ATP-binding cassette sub-family B member 10, mitochondrial
[10]		P13639	EF2_HUMAN	13	11.7	8.71	1.6e-15	539.259	3	2210000	-2.1	FLVK	TGTITTFEHAHNMR			Q20170801-09	89.7073	482	1.6e-15	1	858	95339	HUMAN	Elongation factor 2
[10]		P13639	EF2_HUMAN	13	11.7	8.71	1.6e-15	654.663	3	103743	-1.5	NRKR	GHVFEESQVAGTPMFVVK			Q20170801-09	169.87	768	6e-10	1	858	95339	HUMAN	Elongation factor 2
[10]		P13639	EF2_HUMAN	13	11.7	8.71	1.6e-15	683.016	3	170143	1.1	NRKR	GHVFEESQVAGTPMFVVK		Abu@N-term	Q20170801-07	173.447	768	1.1e-08	1	858	95339	HUMAN	Elongation factor 2
[10]		P13639	EF2_HUMAN	13	11.7	8.71	1.6e-15	747.904	2	78730	-0.52	KLPR	TFCQLILDPIFK	Carbamidomethyl@3		Q20170801-07	203.844	288	1.8e-08	1	858	95339	HUMAN	Elongation factor 2
[10]		P13639	EF2_HUMAN	13	11.7	8.71	1.6e-15	562.287	2	612950	0.92	DHGK	STLTDSLVCK	Carbamidomethyl@9		Q20170801-09	112.912	33	8e-07	1	858	95339	HUMAN	Elongation factor 2
[10]		P13639	EF2_HUMAN	13	11.7	8.71	1.6e-15	581.618	3	185306	0.29	QRAR	YLAEKYEWDVAEAR			Q20170801-09	152.156	634	9.1e-07	1	858	95339	HUMAN	Elongation factor 2
[10]		P13639	EF2_HUMAN	13	11.7	8.71	1.6e-15	569.76	2	83469	-2.8	LAEK	YEWDVAEAR			Q20170801-09	131.502	639	9.6e-07	1	858	95339	HUMAN	Elongation factor 2
[10]		P13639	EF2_HUMAN	13	11.7	8.71	1.6e-15	411.222	2	2520000	-1.1	PIQR	TILMMGR			Q20170801-09	116.407	450	1.7e-06	1	858	95339	HUMAN	Elongation factor 2
[10]		P13639	EF2_HUMAN	13	11.7	8.71	1.6e-15	520.27	2	192479	2	CDPK	GPLMMYISK			Q20170801-09	153.921	392	2.9e-06	1	858	95339	HUMAN	Elongation factor 2
[10]		P13639	EF2_HUMAN	13	11.7	8.71	1.6e-15	419.219	2	209698	-2.8	PIQR	TILMMGR		Oxidation@5'7	Q20170801-09	117.014	450	1.1e-05	1	858	95339	HUMAN	Elongation factor 2
[10]		P13639	EF2_HUMAN	13	11.7	8.71	1.6e-15	445.759	2	583494	0.24	RVMK	FSVSPVVR			Q20170801-09	116.89	499	1.8e-05	1	858	95339	HUMAN	Elongation factor 2
[10]		P13639	EF2_HUMAN	13	11.7	8.71	1.6e-15	446.257	2	525500	2.3	QVVG	GIYGVLNR			Q20170801-09	118.73	758	0.00063	1	858	95339	HUMAN	Elongation factor 2
[10]		P13639	EF2_HUMAN	13	11.7	8.71	1.6e-15	419.219	2	333828	-0.35	PIQR	TILMMGR		Oxidation@4'9	Q20170801-09	96.1864	450	0.0041	1	858	95339	HUMAN	Elongation factor 2
[11]		P80297	MT1X_HUMAN	6	49.2	20.77	7.3e-38	736.619	3	253176	-0.51	GCAK	CAQGCICKGTSDKCSCCA	Carbamidomethyl@1;Carbamidomethyl@5;Carbamidomethyl@7;Carbamidomethyl@14;Carbamidomethyl@16;Carbamidomethyl@17	Abu@N-term	Q20170801-07	56.5667	44	7.3e-38	1	61	6068.4	HUMAN	Metallothionein-1X
[11]		P80297	MT1X_HUMAN	6	49.2	20.77	7.3e-38	765.784	2	975059	-1.3	SCKK	SCCSCCPVGCAK	Carbamidomethyl@2;Carbamidomethyl@3;Carbamidomethyl@5;Carbamidomethyl@6;Carbamidomethyl@10	Abu@N-term	Q20170801-07	47.352	32	3.6e-17	5	61	6068.4	HUMAN	Metallothionein-1X
[11]		P80297	MT1X_HUMAN	6	49.2	20.77	7.3e-38	722.267	2	73000	-2.2	CKKS	CCSCCPVGCAK	Carbamidomethyl@1;Carbamidomethyl@2;Carbamidomethyl@4;Carbamidomethyl@5;Carbamidomethyl@9	Abu@N-term	Q20170801-07	45.4862	33	9.1e-15	6	61	6068.4	HUMAN	Metallothionein-1X
[11]		P80297	MT1X_HUMAN	6	49.2	20.77	7.3e-38	523.899	3	213620	-0.23	GCAK	CAQGCICKGTSDK	Carbamidomethyl@1;Carbamidomethyl@5;Carbamidomethyl@7	Abu@N-term	Q20170801-07	33.2501	44	1.5e-10	1	61	6068.4	HUMAN	Metallothionein-1X
[11]		P80297	MT1X_HUMAN	6	49.2	20.77	7.3e-38	723.255	2	59169	-4.8	SCKK	SCCSCCPVGCAK	Carbamidomethyl@2;Carbamidomethyl@3;Carbamidomethyl@5;Carbamidomethyl@6;Carbamidomethyl@10		Q20170801-07	40.4098	32	6e-10	5	61	6068.4	HUMAN	Metallothionein-1X
[11]		P80297	MT1X_HUMAN	6	49.2	20.77	7.3e-38	541.233	2	328108	-0.16	GCAK	CAQGCICK	Carbamidomethyl@1;Carbamidomethyl@5;Carbamidomethyl@7	Abu@N-term	Q20170801-09	29.8548	44	1.3e-07	5	61	6068.4	HUMAN	Metallothionein-1X
[11-1]	2	P02795	MT2_HUMAN	6	49.2	11.81	2.9e-21	726.615	3	109045	-0.73	GCAK	CAQGCICKGASDKCSCCA	Carbamidomethyl@1;Carbamidomethyl@5;Carbamidomethyl@7;Carbamidomethyl@14;Carbamidomethyl@16;Carbamidomethyl@17	Abu@N-term	Q20170801-07	58.6685	44	2.9e-21	1	61	6042.3	HUMAN	Metallothionein-2
[11-1]	2	P02795	MT2_HUMAN	6	49.2	11.81	2.9e-21	765.784	2	975059	-1.3	SCKK	SCCSCCPVGCAK	Carbamidomethyl@2;Carbamidomethyl@3;Carbamidomethyl@5;Carbamidomethyl@6;Carbamidomethyl@10	Abu@N-term	Q20170801-07	47.352	32	3.6e-17	5	61	6042.3	HUMAN	Metallothionein-2
[11-1]	2	P02795	MT2_HUMAN	6	49.2	11.81	2.9e-21	722.267	2	73000	-2.2	CKKS	CCSCCPVGCAK	Carbamidomethyl@1;Carbamidomethyl@2;Carbamidomethyl@4;Carbamidomethyl@5;Carbamidomethyl@9	Abu@N-term	Q20170801-07	45.4862	33	9.1e-15	6	61	6042.3	HUMAN	Metallothionein-2
[11-1]	2	P02795	MT2_HUMAN	6	49.2	11.81	2.9e-21	723.255	2	59169	-4.8	SCKK	SCCSCCPVGCAK	Carbamidomethyl@2;Carbamidomethyl@3;Carbamidomethyl@5;Carbamidomethyl@6;Carbamidomethyl@10		Q20170801-07	40.4098	32	6e-10	5	61	6042.3	HUMAN	Metallothionein-2
[11-1]	2	P02795	MT2_HUMAN	6	49.2	11.81	2.9e-21	541.233	2	328108	-0.16	GCAK	CAQGCICK	Carbamidomethyl@1;Carbamidomethyl@5;Carbamidomethyl@7	Abu@N-term	Q20170801-09	29.8548	44	1.3e-07	5	61	6042.3	HUMAN	Metallothionein-2
[11-1]	2	P02795	MT2_HUMAN	6	49.2	11.81	2.9e-21	513.896	3	67870	0.65	GCAK	CAQGCICKGASDK	Carbamidomethyl@1;Carbamidomethyl@5;Carbamidomethyl@7	Abu@N-term	Q20170801-09	32.4352	44	3.5e-06	1	61	6042.3	HUMAN	Metallothionein-2
[12]		P07437	TBB5_HUMAN	12	36.3	8.45	4.9e-15	933.453	3	266049	0.28	DSVR	SGPFGQIFRPDNFVFGQSGAGNNWAK			Q20170801-09	198.635	78	4.9e-15	5	444	49671.3	HUMAN	Tubulin beta chain
[12]		P07437	TBB5_HUMAN	12	36.3	8.45	4.9e-15	442.912	3	628872	0.5	NNVK	TAVCDIPPRGLK	Carbamidomethyl@4		Q20170801-09	101.785	351	2.8e-10	7	444	49671.3	HUMAN	Tubulin beta chain
[12]		P07437	TBB5_HUMAN	12	36.3	8.45	4.9e-15	514.764	2	93914	1.8	NNVK	TAVCDIPPR	Carbamidomethyl@4		Q20170801-09	76.7693	351	1.3e-09	7	444	49671.3	HUMAN	Tubulin beta chain
[12]		P07437	TBB5_HUMAN	12	36.3	8.45	4.9e-15	704.025	3	199528	-1.1	-	MREIVHIQAGQCGNQIGAK	Carbamidomethyl@12		Q20170801-09	113.401	1	1.1e-08	6	444	49671.3	HUMAN	Tubulin beta chain
[12]		P07437	TBB5_HUMAN	12	36.3	8.45	4.9e-15	808.419	2	70138	-3.3	YVPR	AILVDLEPGTMDSVR			Q20170801-07	182.233	63	1.1e-08	4	444	49671.3	HUMAN	Tubulin beta chain
[12]		P07437	TBB5_HUMAN	12	36.3	8.45	4.9e-15	651.322	2	145793	0.42	QLDR	ISVYYNEATGGK			Q20170801-09	105.938	47	4e-08	1	444	49671.3	HUMAN	Tubulin beta chain
[12]		P07437	TBB5_HUMAN	12	36.3	8.45	4.9e-15	660.355	2	229309	0.11	YPDR	IMNTFSVVPSPK			Q20170801-09	157.603	163	5.1e-08	4	444	49671.3	HUMAN	Tubulin beta chain
[12]		P07437	TBB5_HUMAN	12	36.3	8.45	4.9e-15	848.92	2	100545	-0.6	VQNK	NSSYFVEWIPNNVK			Q20170801-09	188.292	337	4e-07	7	444	49671.3	HUMAN	Tubulin beta chain
[12]		P07437	TBB5_HUMAN	12	36.3	8.45	4.9e-15	810.921	2	121121	-0.74	PFPR	LHFFMPGFAPLTSR			Q20170801-09	195.59	263	8.4e-07	8	444	49671.3	HUMAN	Tubulin beta chain
[12]		P07437	TBB5_HUMAN	12	36.3	8.45	4.9e-15	830.451	2	138622	-0.42	QQYR	ALTVPELTQQVFDAK			Q20170801-09	191.455	283	2e-05	1	444	49671.3	HUMAN	Tubulin beta chain
[12]		P07437	TBB5_HUMAN	12	36.3	8.45	4.9e-15	472.542	3	135584	0.93	FDAK	NMMAACDPRHGR	Carbamidomethyl@6		Q20170801-09	52.5978	298	0.00011	8	444	49671.3	HUMAN	Tubulin beta chain
[12]		P07437	TBB5_HUMAN	12	36.3	8.45	4.9e-15	572.321	2	262523	-0.098	DLRK	LAVNMVPFPR			Q20170801-09	174.767	253	0.00025	10	444	49671.3	HUMAN	Tubulin beta chain
[12-1]	2	P68371	TBB4B_HUMAN	11	30.3	8.45	4.9e-15	933.453	3	266049	0.28	DSVR	SGPFGQIFRPDNFVFGQSGAGNNWAK			Q20170801-09	198.635	78	4.9e-15	5	445	49831.5	HUMAN	Tubulin beta-4B chain
[12-1]	2	P68371	TBB4B_HUMAN	11	30.3	8.45	4.9e-15	615.316	3	380512	0.18	QLER	INVYYNEATGGKYVPR			Q20170801-09	136.338	47	9.1e-11	1	445	49831.5	HUMAN	Tubulin beta-4B chain
[12-1]	2	P68371	TBB4B_HUMAN	11	30.3	8.45	4.9e-15	442.912	3	628872	0.5	NNVK	TAVCDIPPRGLK	Carbamidomethyl@4		Q20170801-09	101.785	351	2.8e-10	7	445	49831.5	HUMAN	Tubulin beta-4B chain
[12-1]	2	P68371	TBB4B_HUMAN	11	30.3	8.45	4.9e-15	514.764	2	93914	1.8	NNVK	TAVCDIPPR	Carbamidomethyl@4		Q20170801-09	76.7693	351	1.3e-09	7	445	49831.5	HUMAN	Tubulin beta-4B chain
[12-1]	2	P68371	TBB4B_HUMAN	11	30.3	8.45	4.9e-15	704.025	3	199528	-1.1	-	MREIVHLQAGQCGNQIGAK	Carbamidomethyl@12		Q20170801-09	113.401	1	1.1e-08	6	445	49831.5	HUMAN	Tubulin beta-4B chain
[12-1]	2	P68371	TBB4B_HUMAN	11	30.3	8.45	4.9e-15	660.355	2	229309	0.11	YPDR	IMNTFSVVPSPK			Q20170801-09	157.603	163	5.1e-08	4	445	49831.5	HUMAN	Tubulin beta-4B chain
[12-1]	2	P68371	TBB4B_HUMAN	11	30.3	8.45	4.9e-15	664.827	2	78650	-0.59	QLER	INVYYNEATGGK			Q20170801-09	105.941	47	2.3e-07	1	445	49831.5	HUMAN	Tubulin beta-4B chain
[12-1]	2	P68371	TBB4B_HUMAN	11	30.3	8.45	4.9e-15	848.92	2	100545	-0.6	VQNK	NSSYFVEWIPNNVK			Q20170801-09	188.292	337	4e-07	7	445	49831.5	HUMAN	Tubulin beta-4B chain
[12-1]	2	P68371	TBB4B_HUMAN	11	30.3	8.45	4.9e-15	810.921	2	121121	-0.74	PFPR	LHFFMPGFAPLTSR			Q20170801-09	195.59	263	8.4e-07	8	445	49831.5	HUMAN	Tubulin beta-4B chain
[12-1]	2	P68371	TBB4B_HUMAN	11	30.3	8.45	4.9e-15	472.542	3	135584	0.93	FDAK	NMMAACDPRHGR	Carbamidomethyl@6		Q20170801-09	52.5978	298	0.00011	8	445	49831.5	HUMAN	Tubulin beta-4B chain
[12-1]	2	P68371	TBB4B_HUMAN	11	30.3	8.45	4.9e-15	572.321	2	262523	-0.098	DLRK	LAVNMVPFPR			Q20170801-09	174.767	253	0.00025	10	445	49831.5	HUMAN	Tubulin beta-4B chain
[13]		P21333	FLNA_HUMAN	12	5.9	6.16	8.4e-11	549.63	3	4060000	0.032	GLEK	TGVAVNKPAEFTVDAK			Q20170801-09	118.417	685	8.4e-11	1	2647	280741	HUMAN	Filamin-A
[13]		P21333	FLNA_HUMAN	12	5.9	6.16	8.4e-11	425.485	4	1250000	0.47	GLSR	TGVELGKPTHFTVNAK			Q20170801-09	111.292	885	6e-10	1	2647	280741	HUMAN	Filamin-A
[13]		P21333	FLNA_HUMAN	12	5.9	6.16	8.4e-11	515.729	2	91094	0.33	VGQK	SSFTVDCSK	Carbamidomethyl@7		Q20170801-09	57.1222	2576	7.1e-10	1	2647	280741	HUMAN	Filamin-A
[13]		P21333	FLNA_HUMAN	12	5.9	6.16	8.4e-11	934.424	2	51834	-1.2	PIPR	SPYTVTVGQACNPSACR	Carbamidomethyl@11;Carbamidomethyl@16		Q20170801-09	118.309	468	1.6e-08	1	2647	280741	HUMAN	Filamin-A
[13]		P21333	FLNA_HUMAN	12	5.9	6.16	8.4e-11	406.967	4	251848	0.45	HGPR	TPCEEILVKHVGSR	Carbamidomethyl@3		Q20170801-09	102.064	2599	8.2e-08	1	2647	280741	HUMAN	Filamin-A
[13]		P21333	FLNA_HUMAN	12	5.9	6.16	8.4e-11	882.429	2	100	-2.8	VKAR	VANPSGNLTETYVQDR			Q20170801-09	127.306	1297	2.4e-07	1	2647	280741	HUMAN	Filamin-A
[13]		P21333	FLNA_HUMAN	12	5.9	6.16	8.4e-11	715.36	2	59215	-3.4	SKVK	AFGPGLQGGSAGSPAR			Q20170801-09	103.76	1072	2.8e-07	1	2647	280741	HUMAN	Filamin-A
[13]		P21333	FLNA_HUMAN	12	5.9	6.16	8.4e-11	544.787	2	2650000	0.93	HGPR	TPCEEILVK	Carbamidomethyl@3		Q20170801-09	106.272	2599	1.2e-06	1	2647	280741	HUMAN	Filamin-A
[13]		P21333	FLNA_HUMAN	12	5.9	6.16	8.4e-11	613.829	2	776304	-1.7	QKVR	AWGPGLEGGVVGK			Q20170801-09	145.867	581	2.3e-06	1	2647	280741	HUMAN	Filamin-A
[13]		P21333	FLNA_HUMAN	12	5.9	6.16	8.4e-11	767.389	2	159605	0.33	GLER	AEAGVPAEFSIWTR			Q20170801-07	186.702	2251	4.6e-06	1	2647	280741	HUMAN	Filamin-A
[13]		P21333	FLNA_HUMAN	12	5.9	6.16	8.4e-11	785.908	2	76287	1.4	VETR	GAGTGGLGLAVEGPSEAK			Q20170801-09	134.961	1382	4.9e-06	1	2647	280741	HUMAN	Filamin-A
[13]		P21333	FLNA_HUMAN	12	5.9	6.16	8.4e-11	504.267	2	338534	0.21	PWKK	IQQNTFTR			Q20170801-09	52.527	44	0.0005	3	2647	280741	HUMAN	Filamin-A
[13-1]	3	O75369	FLNB_HUMAN	4	1.6	6.05	1.3e-10	730.841	2	443076	1.3	SEGR	TFEMSDFIVDTR			Q20170801-09	187.953	2017	1.3e-10	1	2602	278166	HUMAN	Filamin-B
[13-1]	3	O75369	FLNB_HUMAN	4	1.6	6.05	1.3e-10	521.746	2	110867	-2	VGQK	SSFLVDCSK	Carbamidomethyl@7		Q20170801-09	94.9519	2531	1.7e-07	1	2602	278166	HUMAN	Filamin-B
[13-1]	3	O75369	FLNB_HUMAN	4	1.6	6.05	1.3e-10	625.816	2	154247	-2.1	STVK	TGEEVGFVVDAK			Q20170801-09	130.658	1630	2.7e-05	1	2602	278166	HUMAN	Filamin-B
[13-1]	3	O75369	FLNB_HUMAN	4	1.6	6.05	1.3e-10	504.267	2	338534	0.21	PWKK	IQQNTFTR			Q20170801-09	52.527	17	0.0005	3	2602	278166	HUMAN	Filamin-B
[13-2]	1	Q14315	FLNC_HUMAN	2	1.2	1.51	0.0005	504.267	2	338534	0.21	PWKK	IQQNTFTR			Q20170801-09	52.527	37	0.0005	3	2725	291025	HUMAN	Filamin-C
[13-2]	1	Q14315	FLNC_HUMAN	2	1.2	1.51	0.0005	822.091	3	2040000	1.3	TTGV	SSEFIVNTLNAGSGALSVTIDGPSK			Q20170801-09	185.869	2523	0.047	1	2725	291025	HUMAN	Filamin-C
[14]		Q5QNW6	H2B2F_HUMAN	13	84.1	5.93	2.2e-10	503.619	3	429139	-0.15	YVYK	VLKQVHPDTGISSK			Q20170801-09	62.7151	45	2.2e-10	15	126	13920.3	HUMAN	Histone H2B type 2-F
[14]		Q5QNW6	H2B2F_HUMAN	13	84.1	5.93	2.2e-10	598.652	3	167120	1.1	ELAK	HAVSEGTKAVTKYTSSK			Q20170801-07	66.0411	110	3.7e-10	12	126	13920.3	HUMAN	Histone H2B type 2-F
[14]		Q5QNW6	H2B2F_HUMAN	13	84.1	5.93	2.2e-10	360.201	3	328902	-1.3	-	MPDPAKSAPAPK		Met-loss@1	Q20170801-07	26.789	1	7.8e-10	3	126	13920.3	HUMAN	Histone H2B type 2-F
[14]		Q5QNW6	H2B2F_HUMAN	13	84.1	5.93	2.2e-10	872.415	2	43964	2.1	ISSK	AMGIMNSFVNDIFER			Q20170801-09	206.377	59	2.4e-09	14	126	13920.3	HUMAN	Histone H2B type 2-F
[14]		Q5QNW6	H2B2F_HUMAN	13	84.1	5.93	2.2e-10	576.288	2	193280	0.07	KVLK	QVHPDTGISSK		Gln->pyro-Glu@1	Q20170801-09	66.3949	48	9.4e-09	15	126	13920.3	HUMAN	Histone H2B type 2-F
[14]		Q5QNW6	H2B2F_HUMAN	13	84.1	5.93	2.2e-10	409.894	3	315956	-1.5	ELAK	HAVSEGTKAVTK			Q20170801-09	16.1124	110	9.2e-08	15	126	13920.3	HUMAN	Histone H2B type 2-F
[14]		Q5QNW6	H2B2F_HUMAN	13	84.1	5.93	2.2e-10	487.939	3	381989	0.48	YNKR	STITSREIQTAVR			Q20170801-07	99.7939	88	2.2e-07	13	126	13920.3	HUMAN	Histone H2B type 2-F
[14]		Q5QNW6	H2B2F_HUMAN	13	84.1	5.93	2.2e-10	503.596	3	612720	0.18	KRKR	SRKESYSVYVYK			Q20170801-09	85.9621	33	7e-06	9	126	13920.3	HUMAN	Histone H2B type 2-F
[14]		Q5QNW6	H2B2F_HUMAN	13	84.1	5.93	2.2e-10	390.203	3	1380000	-2.1	KVLK	QVHPDTGISSK			Q20170801-09	31.8431	48	7.3e-06	15	126	13920.3	HUMAN	Histone H2B type 2-F
[14]		Q5QNW6	H2B2F_HUMAN	13	84.1	5.93	2.2e-10	588.343	3	214961	4	TAVR	LLLPGELAKHAVSEGTK			Q20170801-09	151.296	101	9.3e-06	15	126	13920.3	HUMAN	Histone H2B type 2-F
[14]		Q5QNW6	H2B2F_HUMAN	13	84.1	5.93	2.2e-10	477.305	2	906182	-0.28	TAVR	LLLPGELAK			Q20170801-09	154.583	101	6e-05	15	126	13920.3	HUMAN	Histone H2B type 2-F
[14]		Q5QNW6	H2B2F_HUMAN	13	84.1	5.93	2.2e-10	387.465	4	65493	-4.6	EASR	LAHYNKRSTITSR			Q20170801-07	42.0088	81	7.3e-05	15	126	13920.3	HUMAN	Histone H2B type 2-F
[14]		Q5QNW6	H2B2F_HUMAN	13	84.1	5.93	2.2e-10	397.219	4	173667	-1.8	IFER	IAGEASRLAHYNKR			Q20170801-07	68.2891	74	0.0025	13	126	13920.3	HUMAN	Histone H2B type 2-F
[14-1]	1	P62807	H2B1C_HUMAN	13	84.1	5.93	2.2e-10	503.619	3	429139	-0.15	YVYK	VLKQVHPDTGISSK			Q20170801-09	62.7151	45	2.2e-10	15	126	13906.3	HUMAN	Histone H2B type 1-C/E/F/G/I
[14-1]	1	P62807	H2B1C_HUMAN	13	84.1	5.93	2.2e-10	598.652	3	167120	1.1	ELAK	HAVSEGTKAVTKYTSSK			Q20170801-07	66.0411	110	3.7e-10	12	126	13906.3	HUMAN	Histone H2B type 1-C/E/F/G/I
[14-1]	1	P62807	H2B1C_HUMAN	13	84.1	5.93	2.2e-10	872.415	2	43964	2.1	ISSK	AMGIMNSFVNDIFER			Q20170801-09	206.377	59	2.4e-09	14	126	13906.3	HUMAN	Histone H2B type 1-C/E/F/G/I
[14-1]	1	P62807	H2B1C_HUMAN	13	84.1	5.93	2.2e-10	364.873	3	267998	-0.88	-	MPEPAKSAPAPK		Met-loss@1	Q20170801-07	21.3774	1	8.3e-09	3	126	13906.3	HUMAN	Histone H2B type 1-C/E/F/G/I
[14-1]	1	P62807	H2B1C_HUMAN	13	84.1	5.93	2.2e-10	576.288	2	193280	0.07	KVLK	QVHPDTGISSK		Gln->pyro-Glu@1	Q20170801-09	66.3949	48	9.4e-09	15	126	13906.3	HUMAN	Histone H2B type 1-C/E/F/G/I
[14-1]	1	P62807	H2B1C_HUMAN	13	84.1	5.93	2.2e-10	409.894	3	315956	-1.5	ELAK	HAVSEGTKAVTK			Q20170801-09	16.1124	110	9.2e-08	15	126	13906.3	HUMAN	Histone H2B type 1-C/E/F/G/I
[14-1]	1	P62807	H2B1C_HUMAN	13	84.1	5.93	2.2e-10	487.939	3	381989	0.48	YNKR	STITSREIQTAVR			Q20170801-07	99.7939	88	2.2e-07	13	126	13906.3	HUMAN	Histone H2B type 1-C/E/F/G/I
[14-1]	1	P62807	H2B1C_HUMAN	13	84.1	5.93	2.2e-10	503.596	3	612720	0.18	KRKR	SRKESYSVYVYK			Q20170801-09	85.9621	33	7e-06	9	126	13906.3	HUMAN	Histone H2B type 1-C/E/F/G/I
[14-1]	1	P62807	H2B1C_HUMAN	13	84.1	5.93	2.2e-10	390.203	3	1380000	-2.1	KVLK	QVHPDTGISSK			Q20170801-09	31.8431	48	7.3e-06	15	126	13906.3	HUMAN	Histone H2B type 1-C/E/F/G/I
[14-1]	1	P62807	H2B1C_HUMAN	13	84.1	5.93	2.2e-10	588.343	3	214961	4	TAVR	LLLPGELAKHAVSEGTK			Q20170801-09	151.296	101	9.3e-06	15	126	13906.3	HUMAN	Histone H2B type 1-C/E/F/G/I
[14-1]	1	P62807	H2B1C_HUMAN	13	84.1	5.93	2.2e-10	477.305	2	906182	-0.28	TAVR	LLLPGELAK			Q20170801-09	154.583	101	6e-05	15	126	13906.3	HUMAN	Histone H2B type 1-C/E/F/G/I
[14-1]	1	P62807	H2B1C_HUMAN	13	84.1	5.93	2.2e-10	387.465	4	65493	-4.6	EASR	LAHYNKRSTITSR			Q20170801-07	42.0088	81	7.3e-05	15	126	13906.3	HUMAN	Histone H2B type 1-C/E/F/G/I
[14-1]	1	P62807	H2B1C_HUMAN	13	84.1	5.93	2.2e-10	397.219	4	173667	-1.8	IFER	IAGEASRLAHYNKR			Q20170801-07	68.2891	74	0.0025	13	126	13906.3	HUMAN	Histone H2B type 1-C/E/F/G/I
[14-2]	1	P58876	H2B1D_HUMAN	13	84.1	5.93	2.2e-10	503.619	3	429139	-0.15	YVYK	VLKQVHPDTGISSK			Q20170801-09	62.7151	45	2.2e-10	15	126	13936.3	HUMAN	Histone H2B type 1-D
[14-2]	1	P58876	H2B1D_HUMAN	13	84.1	5.93	2.2e-10	598.652	3	167120	1.1	ELAK	HAVSEGTKAVTKYTSSK			Q20170801-07	66.0411	110	3.7e-10	12	126	13936.3	HUMAN	Histone H2B type 1-D
[14-2]	1	P58876	H2B1D_HUMAN	13	84.1	5.93	2.2e-10	872.415	2	43964	2.1	ISSK	AMGIMNSFVNDIFER			Q20170801-09	206.377	59	2.4e-09	14	126	13936.3	HUMAN	Histone H2B type 1-D
[14-2]	1	P58876	H2B1D_HUMAN	13	84.1	5.93	2.2e-10	576.288	2	193280	0.07	KVLK	QVHPDTGISSK		Gln->pyro-Glu@1	Q20170801-09	66.3949	48	9.4e-09	15	126	13936.3	HUMAN	Histone H2B type 1-D
[14-2]	1	P58876	H2B1D_HUMAN	13	84.1	5.93	2.2e-10	374.876	3	317985	-1.8	-	MPEPTKSAPAPK		Met-loss@1	Q20170801-09	19.0792	1	7e-08	1	126	13936.3	HUMAN	Histone H2B type 1-D
[14-2]	1	P58876	H2B1D_HUMAN	13	84.1	5.93	2.2e-10	409.894	3	315956	-1.5	ELAK	HAVSEGTKAVTK			Q20170801-09	16.1124	110	9.2e-08	15	126	13936.3	HUMAN	Histone H2B type 1-D
[14-2]	1	P58876	H2B1D_HUMAN	13	84.1	5.93	2.2e-10	487.939	3	381989	0.48	YNKR	STITSREIQTAVR			Q20170801-07	99.7939	88	2.2e-07	13	126	13936.3	HUMAN	Histone H2B type 1-D
[14-2]	1	P58876	H2B1D_HUMAN	13	84.1	5.93	2.2e-10	503.596	3	612720	0.18	KRKR	SRKESYSVYVYK			Q20170801-09	85.9621	33	7e-06	9	126	13936.3	HUMAN	Histone H2B type 1-D
[14-2]	1	P58876	H2B1D_HUMAN	13	84.1	5.93	2.2e-10	390.203	3	1380000	-2.1	KVLK	QVHPDTGISSK			Q20170801-09	31.8431	48	7.3e-06	15	126	13936.3	HUMAN	Histone H2B type 1-D
[14-2]	1	P58876	H2B1D_HUMAN	13	84.1	5.93	2.2e-10	588.343	3	214961	4	TAVR	LLLPGELAKHAVSEGTK			Q20170801-09	151.296	101	9.3e-06	15	126	13936.3	HUMAN	Histone H2B type 1-D
[14-2]	1	P58876	H2B1D_HUMAN	13	84.1	5.93	2.2e-10	477.305	2	906182	-0.28	TAVR	LLLPGELAK			Q20170801-09	154.583	101	6e-05	15	126	13936.3	HUMAN	Histone H2B type 1-D
[14-2]	1	P58876	H2B1D_HUMAN	13	84.1	5.93	2.2e-10	387.465	4	65493	-4.6	EASR	LAHYNKRSTITSR			Q20170801-07	42.0088	81	7.3e-05	15	126	13936.3	HUMAN	Histone H2B type 1-D
[14-2]	1	P58876	H2B1D_HUMAN	13	84.1	5.93	2.2e-10	397.219	4	173667	-1.8	IFER	IAGEASRLAHYNKR			Q20170801-07	68.2891	74	0.0025	13	126	13936.3	HUMAN	Histone H2B type 1-D
[14-3]	1	O60814	H2B1K_HUMAN	12	80.2	5.93	2.2e-10	503.619	3	429139	-0.15	YVYK	VLKQVHPDTGISSK			Q20170801-09	62.7151	45	2.2e-10	15	126	13890.3	HUMAN	Histone H2B type 1-K
[14-3]	1	O60814	H2B1K_HUMAN	12	80.2	5.93	2.2e-10	872.415	2	43964	2.1	ISSK	AMGIMNSFVNDIFER			Q20170801-09	206.377	59	2.4e-09	14	126	13890.3	HUMAN	Histone H2B type 1-K
[14-3]	1	O60814	H2B1K_HUMAN	12	80.2	5.93	2.2e-10	364.873	3	267998	-0.88	-	MPEPAKSAPAPK		Met-loss@1	Q20170801-07	21.3774	1	8.3e-09	3	126	13890.3	HUMAN	Histone H2B type 1-K
[14-3]	1	O60814	H2B1K_HUMAN	12	80.2	5.93	2.2e-10	576.288	2	193280	0.07	KVLK	QVHPDTGISSK		Gln->pyro-Glu@1	Q20170801-09	66.3949	48	9.4e-09	15	126	13890.3	HUMAN	Histone H2B type 1-K
[14-3]	1	O60814	H2B1K_HUMAN	12	80.2	5.93	2.2e-10	409.894	3	315956	-1.5	ELAK	HAVSEGTKAVTK			Q20170801-09	16.1124	110	9.2e-08	15	126	13890.3	HUMAN	Histone H2B type 1-K
[14-3]	1	O60814	H2B1K_HUMAN	12	80.2	5.93	2.2e-10	487.939	3	381989	0.48	YNKR	STITSREIQTAVR			Q20170801-07	99.7939	88	2.2e-07	13	126	13890.3	HUMAN	Histone H2B type 1-K
[14-3]	1	O60814	H2B1K_HUMAN	12	80.2	5.93	2.2e-10	503.596	3	612720	0.18	KRKR	SRKESYSVYVYK			Q20170801-09	85.9621	33	7e-06	9	126	13890.3	HUMAN	Histone H2B type 1-K
[14-3]	1	O60814	H2B1K_HUMAN	12	80.2	5.93	2.2e-10	390.203	3	1380000	-2.1	KVLK	QVHPDTGISSK			Q20170801-09	31.8431	48	7.3e-06	15	126	13890.3	HUMAN	Histone H2B type 1-K
[14-3]	1	O60814	H2B1K_HUMAN	12	80.2	5.93	2.2e-10	588.343	3	214961	4	TAVR	LLLPGELAKHAVSEGTK			Q20170801-09	151.296	101	9.3e-06	15	126	13890.3	HUMAN	Histone H2B type 1-K
[14-3]	1	O60814	H2B1K_HUMAN	12	80.2	5.93	2.2e-10	477.305	2	906182	-0.28	TAVR	LLLPGELAK			Q20170801-09	154.583	101	6e-05	15	126	13890.3	HUMAN	Histone H2B type 1-K
[14-3]	1	O60814	H2B1K_HUMAN	12	80.2	5.93	2.2e-10	387.465	4	65493	-4.6	EASR	LAHYNKRSTITSR			Q20170801-07	42.0088	81	7.3e-05	15	126	13890.3	HUMAN	Histone H2B type 1-K
[14-3]	1	O60814	H2B1K_HUMAN	12	80.2	5.93	2.2e-10	397.219	4	173667	-1.8	IFER	IAGEASRLAHYNKR			Q20170801-07	68.2891	74	0.0025	13	126	13890.3	HUMAN	Histone H2B type 1-K
[14-4]	1	P06899	H2B1J_HUMAN	11	70.6	5.93	2.2e-10	503.619	3	429139	-0.15	YVYK	VLKQVHPDTGISSK			Q20170801-09	62.7151	45	2.2e-10	15	126	13904.3	HUMAN	Histone H2B type 1-J
[14-4]	1	P06899	H2B1J_HUMAN	11	70.6	5.93	2.2e-10	872.415	2	43964	2.1	ISSK	AMGIMNSFVNDIFER			Q20170801-09	206.377	59	2.4e-09	14	126	13904.3	HUMAN	Histone H2B type 1-J
[14-4]	1	P06899	H2B1J_HUMAN	11	70.6	5.93	2.2e-10	364.873	3	267998	-0.88	-	MPEPAKSAPAPK		Met-loss@1	Q20170801-07	21.3774	1	8.3e-09	3	126	13904.3	HUMAN	Histone H2B type 1-J
[14-4]	1	P06899	H2B1J_HUMAN	11	70.6	5.93	2.2e-10	576.288	2	193280	0.07	KVLK	QVHPDTGISSK		Gln->pyro-Glu@1	Q20170801-09	66.3949	48	9.4e-09	15	126	13904.3	HUMAN	Histone H2B type 1-J
[14-4]	1	P06899	H2B1J_HUMAN	11	70.6	5.93	2.2e-10	409.894	3	315956	-1.5	ELAK	HAVSEGTKAVTK			Q20170801-09	16.1124	110	9.2e-08	15	126	13904.3	HUMAN	Histone H2B type 1-J
[14-4]	1	P06899	H2B1J_HUMAN	11	70.6	5.93	2.2e-10	487.939	3	381989	0.48	YNKR	STITSREIQTAVR			Q20170801-07	99.7939	88	2.2e-07	13	126	13904.3	HUMAN	Histone H2B type 1-J
[14-4]	1	P06899	H2B1J_HUMAN	11	70.6	5.93	2.2e-10	390.203	3	1380000	-2.1	KVLK	QVHPDTGISSK			Q20170801-09	31.8431	48	7.3e-06	15	126	13904.3	HUMAN	Histone H2B type 1-J
[14-4]	1	P06899	H2B1J_HUMAN	11	70.6	5.93	2.2e-10	588.343	3	214961	4	TAVR	LLLPGELAKHAVSEGTK			Q20170801-09	151.296	101	9.3e-06	15	126	13904.3	HUMAN	Histone H2B type 1-J
[14-4]	1	P06899	H2B1J_HUMAN	11	70.6	5.93	2.2e-10	477.305	2	906182	-0.28	TAVR	LLLPGELAK			Q20170801-09	154.583	101	6e-05	15	126	13904.3	HUMAN	Histone H2B type 1-J
[14-4]	1	P06899	H2B1J_HUMAN	11	70.6	5.93	2.2e-10	387.465	4	65493	-4.6	EASR	LAHYNKRSTITSR			Q20170801-07	42.0088	81	7.3e-05	15	126	13904.3	HUMAN	Histone H2B type 1-J
[14-4]	1	P06899	H2B1J_HUMAN	11	70.6	5.93	2.2e-10	397.219	4	173667	-1.8	IFER	IAGEASRLAHYNKR			Q20170801-07	68.2891	74	0.0025	13	126	13904.3	HUMAN	Histone H2B type 1-J
[14-5]	1	Q8N257	H2B3B_HUMAN	10	63.5	5.93	2.2e-10	503.619	3	429139	-0.15	YVYK	VLKQVHPDTGISSK			Q20170801-09	62.7151	45	2.2e-10	15	126	13908.2	HUMAN	Histone H2B type 3-B
[14-5]	1	Q8N257	H2B3B_HUMAN	10	63.5	5.93	2.2e-10	598.652	3	167120	1.1	ELAK	HAVSEGTKAVTKYTSSK			Q20170801-07	66.0411	110	3.7e-10	12	126	13908.2	HUMAN	Histone H2B type 3-B
[14-5]	1	Q8N257	H2B3B_HUMAN	10	63.5	5.93	2.2e-10	872.415	2	43964	2.1	ISSK	AMGIMNSFVNDIFER			Q20170801-09	206.377	59	2.4e-09	14	126	13908.2	HUMAN	Histone H2B type 3-B
[14-5]	1	Q8N257	H2B3B_HUMAN	10	63.5	5.93	2.2e-10	576.288	2	193280	0.07	KVLK	QVHPDTGISSK		Gln->pyro-Glu@1	Q20170801-09	66.3949	48	9.4e-09	15	126	13908.2	HUMAN	Histone H2B type 3-B
[14-5]	1	Q8N257	H2B3B_HUMAN	10	63.5	5.93	2.2e-10	409.894	3	315956	-1.5	ELAK	HAVSEGTKAVTK			Q20170801-09	16.1124	110	9.2e-08	15	126	13908.2	HUMAN	Histone H2B type 3-B
[14-5]	1	Q8N257	H2B3B_HUMAN	10	63.5	5.93	2.2e-10	365.532	3	117835	-3.2	-	MPDPSKSAPAPK		Met-loss@1	Q20170801-09	21.8452	1	3e-07	1	126	13908.2	HUMAN	Histone H2B type 3-B
[14-5]	1	Q8N257	H2B3B_HUMAN	10	63.5	5.93	2.2e-10	390.203	3	1380000	-2.1	KVLK	QVHPDTGISSK			Q20170801-09	31.8431	48	7.3e-06	15	126	13908.2	HUMAN	Histone H2B type 3-B
[14-5]	1	Q8N257	H2B3B_HUMAN	10	63.5	5.93	2.2e-10	588.343	3	214961	4	TAVR	LLLPGELAKHAVSEGTK			Q20170801-09	151.296	101	9.3e-06	15	126	13908.2	HUMAN	Histone H2B type 3-B
[14-5]	1	Q8N257	H2B3B_HUMAN	10	63.5	5.93	2.2e-10	477.305	2	906182	-0.28	TAVR	LLLPGELAK			Q20170801-09	154.583	101	6e-05	15	126	13908.2	HUMAN	Histone H2B type 3-B
[14-5]	1	Q8N257	H2B3B_HUMAN	10	63.5	5.93	2.2e-10	387.465	4	65493	-4.6	EASR	LAHYNKRSTITSR			Q20170801-07	42.0088	81	7.3e-05	15	126	13908.2	HUMAN	Histone H2B type 3-B
[15]		P22626	ROA2_HUMAN	9	25.2	11.74	3.9e-21	730.64	3	360568	0.64	GGSR	NMGGPYGGGNYGPGGSGGSGGYGGR			Q20170801-09	117.597	326	3.9e-21	1	353	37430	HUMAN	Heterogeneous nuclear ribonucleoproteins A2/B1
[15]		P22626	ROA2_HUMAN	9	25.2	11.74	3.9e-21	757.669	3	292059	-0.29	GDSR	GGGGNFGPGPGSNFRGGSDGYGSGR			Q20170801-09	111.348	214	1.5e-13	1	353	37430	HUMAN	Heterogeneous nuclear ribonucleoproteins A2/B1
[15]		P22626	ROA2_HUMAN	9	25.2	11.74	3.9e-21	866.036	3	57824	-3.7	GGSR	NMGGPYGGGNYGPGGSGGSGGYGGRSRY			Q20170801-09	118.67	326	3.8e-10	1	353	37430	HUMAN	Heterogeneous nuclear ribonucleoproteins A2/B1
[15]		P22626	ROA2_HUMAN	9	25.2	11.74	3.9e-21	689.318	2	261982	-0.52	GDSR	GGGGNFGPGPGSNFR			Q20170801-09	104.93	214	1.3e-09	1	353	37430	HUMAN	Heterogeneous nuclear ribonucleoproteins A2/B1
[15]		P22626	ROA2_HUMAN	9	25.2	11.74	3.9e-21	735.973	3	35524	1.6	GGSR	NMGGPYGGGNYGPGGSGGSGGYGGR		Oxidation@2	Q20170801-09	100.147	326	1.5e-08	1	353	37430	HUMAN	Heterogeneous nuclear ribonucleoproteins A2/B1
[15]		P22626	ROA2_HUMAN	9	25.2	11.74	3.9e-21	438.537	3	975631	-0.35	QSSR	SGRGGNFGFGDSR			Q20170801-09	73.0189	201	1.6e-06	1	353	37430	HUMAN	Heterogeneous nuclear ribonucleoproteins A2/B1
[15]		P22626	ROA2_HUMAN	9	25.2	11.74	3.9e-21	507.227	2	279699	3.4	RSGR	GGNFGFGDSR			Q20170801-09	90.4402	204	3.7e-06	1	353	37430	HUMAN	Heterogeneous nuclear ribonucleoproteins A2/B1
[15]		P22626	ROA2_HUMAN	9	25.2	11.74	3.9e-21	550.273	3	88742	-2.5	EVRK	ALSRQEMQEVQSSR			Q20170801-09	76.9189	187	6.9e-06	1	353	37430	HUMAN	Heterogeneous nuclear ribonucleoproteins A2/B1
[15]		P22626	ROA2_HUMAN	9	25.2	11.74	3.9e-21	529.298	2	242449	0.64	-MEK	TLETVPLER			Q20170801-07	116.867	4	5.3e-05	1	353	37430	HUMAN	Heterogeneous nuclear ribonucleoproteins A2/B1
[16]		Q14204	DYHC1_HUMAN	11	2.4	6.52	1.8e-11	542.634	3	378551	0.23	FIKR	TPVIDADKPVSSQLR			Q20170801-07	119.787	122	1.8e-11	1	4646	532412	HUMAN	Cytoplasmic dynein 1 heavy chain 1
[16]		Q14204	DYHC1_HUMAN	11	2.4	6.52	1.8e-11	493.894	3	713535	0.9	KKTR	TDSTSDGRPAWMR			Q20170801-09	93.5317	4366	1.9e-10	1	4646	532412	HUMAN	Cytoplasmic dynein 1 heavy chain 1
[16]		Q14204	DYHC1_HUMAN	11	2.4	6.52	1.8e-11	611.304	2	462488	0.86	VESR	TTDLLTDWEK			Q20170801-07	168.101	1254	1.9e-09	1	4646	532412	HUMAN	Cytoplasmic dynein 1 heavy chain 1
[16]		Q14204	DYHC1_HUMAN	11	2.4	6.52	1.8e-11	497.271	2	248512	-0.87	NMLR	TFSSIPVSR			Q20170801-07	107.797	4160	6.8e-08	1	4646	532412	HUMAN	Cytoplasmic dynein 1 heavy chain 1
[16]		Q14204	DYHC1_HUMAN	11	2.4	6.52	1.8e-11	600.306	2	1050000	0.043	KITR	TSFLDDAFRK			Q20170801-09	143.5	3612	7.2e-08	1	4646	532412	HUMAN	Cytoplasmic dynein 1 heavy chain 1
[16]		Q14204	DYHC1_HUMAN	11	2.4	6.52	1.8e-11	599.272	2	200613	-0.92	DIAR	TEYLSNADER			Q20170801-09	66.1418	3550	7.1e-07	1	4646	532412	HUMAN	Cytoplasmic dynein 1 heavy chain 1
[16]		Q14204	DYHC1_HUMAN	11	2.4	6.52	1.8e-11	696.913	2	100	-2.2	EYRR	TPNGVVLAPVQLGK			Q20170801-09	159.865	2644	7.8e-07	1	4646	532412	HUMAN	Cytoplasmic dynein 1 heavy chain 1
[16]		Q14204	DYHC1_HUMAN	11	2.4	6.52	1.8e-11	598.809	2	167633	0.71	SALK	TLMAQSIYGGR			Q20170801-07	128.15	4245	7.8e-07	1	4646	532412	HUMAN	Cytoplasmic dynein 1 heavy chain 1
[16]		Q14204	DYHC1_HUMAN	11	2.4	6.52	1.8e-11	489.579	3	320862	-1.4	DIAR	TEYLSNADERLR			Q20170801-09	100.88	3550	1.7e-06	1	4646	532412	HUMAN	Cytoplasmic dynein 1 heavy chain 1
[16]		Q14204	DYHC1_HUMAN	11	2.4	6.52	1.8e-11	395.218	2	526043	-0.9	RGGR	TMAITPR			Q20170801-07	61.5337	3168	4.2e-05	1	4646	532412	HUMAN	Cytoplasmic dynein 1 heavy chain 1
[16]		Q14204	DYHC1_HUMAN	11	2.4	6.52	1.8e-11	565.34	2	62227	2.6	RALK	SVLVSAGNVKR			Q20170801-09	66.6758	2095	0.00073	1	4646	532412	HUMAN	Cytoplasmic dynein 1 heavy chain 1
[17]		P10412	H14_HUMAN	9	38.4	10.05	5.3e-18	692.044	3	641263	-0.034	-	MSETAPAAPAAPAPAEKTPVKK		Met-loss+Acetyl@1	Q20170801-09	94.7599	1	5.3e-18	1	219	21865.4	HUMAN	Histone H1.4
[17]		P10412	H14_HUMAN	9	38.4	10.05	5.3e-18	760.882	2	117055	-1.2	-	MSETAPAAPAAPAPAEK		Met-loss+Acetyl@1	Q20170801-07	107.821	1	2.1e-10	1	219	21865.4	HUMAN	Histone H1.4
[17]		P10412	H14_HUMAN	9	38.4	10.05	5.3e-18	789.897	2	58717	-0.34	ALKK	ALAAAGYDVEKNNSR			Q20170801-09	78.8088	65	5.4e-09	5	219	21865.4	HUMAN	Histone H1.4
[17]		P10412	H14_HUMAN	9	38.4	10.05	5.3e-18	389.543	3	202150	-1.2	VQTK	GTGASGSFKLNK			Q20170801-09	54.711	98	1.2e-07	5	219	21865.4	HUMAN	Histone H1.4
[17]		P10412	H14_HUMAN	9	38.4	10.05	5.3e-18	487.306	2	149778	0.68	SKER	SGVSLAALKK			Q20170801-07	89.9396	55	1.6e-07	3	219	21865.4	HUMAN	Histone H1.4
[17]		P10412	H14_HUMAN	9	38.4	10.05	5.3e-18	420.922	3	686993	-0.42	LGLK	SLVSKGTLVQTK			Q20170801-09	84.3849	86	3.8e-07	5	219	21865.4	HUMAN	Histone H1.4
[17]		P10412	H14_HUMAN	9	38.4	10.05	5.3e-18	663.885	2	311860	0.14	AAKR	KASGPPVSELITK			Q20170801-09	108.167	34	1.5e-06	3	219	21865.4	HUMAN	Histone H1.4
[17]		P10412	H14_HUMAN	9	38.4	10.05	5.3e-18	599.837	2	265682	-0.31	AKRK	ASGPPVSELITK			Q20170801-07	134.005	35	3.8e-06	3	219	21865.4	HUMAN	Histone H1.4
[17]		P10412	H14_HUMAN	9	38.4	10.05	5.3e-18	423.258	2	122184	-0.69	SKER	SGVSLAALK			Q20170801-07	117.131	55	3.8e-05	3	219	21865.4	HUMAN	Histone H1.4
[17-1]	3	P16403	H12_HUMAN	10	39.4	8.11	2.1e-14	682.041	3	450326	0.68	-	MSETAPAAPAAAPPAEKAPVKK		Met-loss+Acetyl@1	Q20170801-09	93.4252	1	2.1e-14	1	213	21364.9	HUMAN	Histone H1.2
[17-1]	3	P16403	H12_HUMAN	10	39.4	8.11	2.1e-14	760.88	2	157222	-3.6	-	MSETAPAAPAAAPPAEK		Met-loss+Acetyl@1	Q20170801-09	105.061	1	5.6e-10	1	213	21364.9	HUMAN	Histone H1.2
[17-1]	3	P16403	H12_HUMAN	10	39.4	8.11	2.1e-14	789.897	2	58717	-0.34	ALKK	ALAAAGYDVEKNNSR			Q20170801-09	78.8088	65	5.4e-09	5	213	21364.9	HUMAN	Histone H1.2
[17-1]	3	P16403	H12_HUMAN	10	39.4	8.11	2.1e-14	389.543	3	202150	-1.2	VQTK	GTGASGSFKLNK			Q20170801-09	54.711	98	1.2e-07	5	213	21364.9	HUMAN	Histone H1.2
[17-1]	3	P16403	H12_HUMAN	10	39.4	8.11	2.1e-14	487.306	2	149778	0.68	SKER	SGVSLAALKK			Q20170801-07	89.9396	55	1.6e-07	3	213	21364.9	HUMAN	Histone H1.2
[17-1]	3	P16403	H12_HUMAN	10	39.4	8.11	2.1e-14	420.922	3	686993	-0.42	LGLK	SLVSKGTLVQTK			Q20170801-09	84.3849	86	3.8e-07	5	213	21364.9	HUMAN	Histone H1.2
[17-1]	3	P16403	H12_HUMAN	10	39.4	8.11	2.1e-14	663.885	2	311860	0.14	GTPR	KASGPPVSELITK			Q20170801-09	108.167	34	1.5e-06	3	213	21364.9	HUMAN	Histone H1.2
[17-1]	3	P16403	H12_HUMAN	10	39.4	8.11	2.1e-14	599.837	2	265682	-0.31	TPRK	ASGPPVSELITK			Q20170801-07	134.005	35	3.8e-06	3	213	21364.9	HUMAN	Histone H1.2
[17-1]	3	P16403	H12_HUMAN	10	39.4	8.11	2.1e-14	423.258	2	122184	-0.69	SKER	SGVSLAALK			Q20170801-07	117.131	55	3.8e-05	3	213	21364.9	HUMAN	Histone H1.2
[17-1]	3	P16403	H12_HUMAN	10	39.4	8.11	2.1e-14	958.508	2	39189	-1.5	-	MSETAPAAPAAAPPAEKAPVK		Met-loss+Acetyl@1	Q20170801-09	112.06	1	0.0028	1	213	21364.9	HUMAN	Histone H1.2
[18]		P68104	EF1A1_HUMAN	9	21.4	11.39	1.7e-20	999.136	3	475390	-2.5	KFLK	SGDAAIVDMVPGKPMCVESFSDYPPLGR	Carbamidomethyl@16		Q20170801-09	194.652	396	1.7e-20	2	462	50141.3	HUMAN	Elongation factor 1-alpha 1
[18]		P68104	EF1A1_HUMAN	9	21.4	11.39	1.7e-20	537.609	3	498079	0.89	IDKR	TIEKFEKEAAEMGK			Q20170801-09	118.884	38	1.7e-10	3	462	50141.3	HUMAN	Elongation factor 1-alpha 1
[18]		P68104	EF1A1_HUMAN	9	21.4	11.39	1.7e-20	439.583	3	304599	0.13	FAVR	DMRQTVAVGVIK			Q20170801-07	126.594	428	7.1e-08	3	462	50141.3	HUMAN	Elongation factor 1-alpha 1
[18]		P68104	EF1A1_HUMAN	9	21.4	11.39	1.7e-20	560.803	2	431102	-0.027	DSGK	STTTGHLIYK			Q20170801-07	61.4894	21	1.1e-07	3	462	50141.3	HUMAN	Elongation factor 1-alpha 1
[18]		P68104	EF1A1_HUMAN	9	21.4	11.39	1.7e-20	449.274	2	590898	0.015	RDMR	QTVAVGVIK		Gln->pyro-Glu@1	Q20170801-09	142.364	431	4e-07	3	462	50141.3	HUMAN	Elongation factor 1-alpha 1
[18]		P68104	EF1A1_HUMAN	9	21.4	11.39	1.7e-20	513.309	2	176693	0.75	DVYK	IGGIGTVPVGR			Q20170801-07	122.275	256	8.2e-07	3	462	50141.3	HUMAN	Elongation factor 1-alpha 1
[18]		P68104	EF1A1_HUMAN	9	21.4	11.39	1.7e-20	839.132	3	49469	-1.3	PVGR	VETGVLKPGMVVTFAPVNVTTEVK			Q20170801-09	189.669	267	1.1e-05	2	462	50141.3	HUMAN	Elongation factor 1-alpha 1
[18]		P68104	EF1A1_HUMAN	9	21.4	11.39	1.7e-20	980.796	3	327085	5.6	FLKS	GDAAIVDMVPGKPMCVESFSDYPPLGR	Carbamidomethyl@15	Oxidation@8;Oxidation@14	Q20170801-09	197.234	397	1.1e-05	2	462	50141.3	HUMAN	Elongation factor 1-alpha 1
[18]		P68104	EF1A1_HUMAN	9	21.4	11.39	1.7e-20	457.787	2	233569	0.19	RDMR	QTVAVGVIK			Q20170801-09	93.0771	431	1.6e-05	3	462	50141.3	HUMAN	Elongation factor 1-alpha 1
[19]		P12956	XRCC6_HUMAN	8	10.3	9.51	5.4e-17	634.96	3	461766	0.8	SHKR	IMLFTNEDNPHGNDSAK			Q20170801-09	121.276	166	5.4e-17	1	609	69843.7	HUMAN	X-ray repair cross-complementing protein 6
[19]		P12956	XRCC6_HUMAN	8	10.3	9.51	5.4e-17	904.484	2	113322	3.5	TKTR	TFNTSTGGLLLPSDTKR			Q20170801-09	149.193	302	4.5e-13	1	609	69843.7	HUMAN	X-ray repair cross-complementing protein 6
[19]		P12956	XRCC6_HUMAN	8	10.3	9.51	5.4e-17	555.015	4	690586	0.8	SHKR	IMLFTNEDNPHGNDSAKASR			Q20170801-09	109.323	166	2.2e-12	1	609	69843.7	HUMAN	X-ray repair cross-complementing protein 6
[19]		P12956	XRCC6_HUMAN	8	10.3	9.51	5.4e-17	826.429	2	552772	-1.8	TKTR	TFNTSTGGLLLPSDTK			Q20170801-09	164.217	302	2.3e-12	1	609	69843.7	HUMAN	X-ray repair cross-complementing protein 6
[19]		P12956	XRCC6_HUMAN	8	10.3	9.51	5.4e-17	568.61	3	534694	0.94	FTYR	SDSFENPVLQQHFR			Q20170801-09	148.855	475	2.5e-10	1	609	69843.7	HUMAN	X-ray repair cross-complementing protein 6
[19]		P12956	XRCC6_HUMAN	8	10.3	9.51	5.4e-17	537.286	2	273783	-0.9	FTEK	IMATPEQVGK			Q20170801-09	78.5232	452	1.9e-05	1	609	69843.7	HUMAN	X-ray repair cross-complementing protein 6
[19]		P12956	XRCC6_HUMAN	8	10.3	9.51	5.4e-17	637.008	3	121241	3.5	VKTK	TRTFNTSTGGLLLPSDTK			Q20170801-09	148.257	300	0.00025	1	609	69843.7	HUMAN	X-ray repair cross-complementing protein 6
[19]		P12956	XRCC6_HUMAN	8	10.3	9.51	5.4e-17	689.04	3	154376	0.49	VKTK	TRTFNTSTGGLLLPSDTKR			Q20170801-09	133.89	300	0.0063	1	609	69843.7	HUMAN	X-ray repair cross-complementing protein 6
[20]		P49327	FAS_HUMAN	10	5	9.21	1.9e-16	623.936	3	271646	1.3	ILEK	FCFTPHTEEGCLSER	Carbamidomethyl@2;Carbamidomethyl@11		Q20170801-09	137.145	1117	1.9e-16	1	2511	273429	HUMAN	Fatty acid synthase
[20]		P49327	FAS_HUMAN	10	5	9.21	1.9e-16	764.004	3	141240	2.3	LRAK	TGGAYGEDLGADYNLSQVCDGK	Carbamidomethyl@19		Q20170801-09	164.869	2450	3.7e-12	1	2511	273429	HUMAN	Fatty acid synthase
[20]		P49327	FAS_HUMAN	10	5	9.21	1.9e-16	550.947	3	526974	0.075	GSTK	SNMGHPEPASGLAALAK			Q20170801-09	127.525	327	1.4e-10	1	2511	273429	HUMAN	Fatty acid synthase
[20]		P49327	FAS_HUMAN	10	5	9.21	1.9e-16	713.89	2	1180000	-0.058	LNLR	SLLVNPEGPTLMR			Q20170801-09	171.023	2221	1.4e-08	1	2511	273429	HUMAN	Fatty acid synthase
[20]		P49327	FAS_HUMAN	10	5	9.21	1.9e-16	651.841	2	153279	1.3	LSER	AALQEELQLCK	Carbamidomethyl@10		Q20170801-09	139.703	1132	1.7e-08	1	2511	273429	HUMAN	Fatty acid synthase
[20]		P49327	FAS_HUMAN	10	5	9.21	1.9e-16	721.886	2	92047	-1.1	LNLR	SLLVNPEGPTLMR		Oxidation@12	Q20170801-09	153.461	2221	4.2e-05	1	2511	273429	HUMAN	Fatty acid synthase
[20]		P49327	FAS_HUMAN	10	5	9.21	1.9e-16	848.075	3	89854	0.44	QLIR	SLYQSAGVAPESFEYIEAHGTGTK			Q20170801-07	176.438	275	0.00042	1	2511	273429	HUMAN	Fatty acid synthase
[20]		P49327	FAS_HUMAN	10	5	9.21	1.9e-16	543.314	2	423430	0.018	CATR	QEPLLIGSTK			Q20170801-09	111.671	317	0.00066	1	2511	273429	HUMAN	Fatty acid synthase
[20]		P49327	FAS_HUMAN	10	5	9.21	1.9e-16	395.715	2	251536	-0.61	ELPR	LLSAACR	Carbamidomethyl@6		Q20170801-09	45.8007	1181	0.0024	2	2511	273429	HUMAN	Fatty acid synthase
[20]		P49327	FAS_HUMAN	10	5	9.21	1.9e-16	488.766	2	87825	0.38	FAAR	SFYYKLR			Q20170801-07	108.831	2422	0.0069	1	2511	273429	HUMAN	Fatty acid synthase
[21]		P06576	ATPB_HUMAN	9	19.8	6.01	1.6e-10	639.822	2	124751	0.35	STVR	TIAMDGTEGLVR		Oxidation@4	Q20170801-09	106.177	110	1.6e-10	1	529	56560.4	HUMAN	ATP synthase subunit beta, mitochondrial
[21]		P06576	ATPB_HUMAN	9	19.8	6.01	1.6e-10	631.824	2	2700000	0.43	STVR	TIAMDGTEGLVR			Q20170801-09	137.097	110	6.6e-10	1	529	56560.4	HUMAN	ATP synthase subunit beta, mitochondrial
[21]		P06576	ATPB_HUMAN	9	19.8	6.01	1.6e-10	994.522	2	88700	1.5	VLSR	AIAELGIYPAVDPLDSTSR			Q20170801-09	193.819	388	2.8e-09	1	529	56560.4	HUMAN	ATP synthase subunit beta, mitochondrial
[21]		P06576	ATPB_HUMAN	9	19.8	6.01	1.6e-10	720.398	2	187362	-1.1	ARAR	VALTGLTVAEYFR			Q20170801-09	194.56	282	7.3e-09	1	529	56560.4	HUMAN	ATP synthase subunit beta, mitochondrial
[21]		P06576	ATPB_HUMAN	9	19.8	6.01	1.6e-10	605.962	3	186764	0.47	STSR	IMDPNIVGSEHYDVAR			Q20170801-09	144.394	407	2.3e-08	1	529	56560.4	HUMAN	ATP synthase subunit beta, mitochondrial
[21]		P06576	ATPB_HUMAN	9	19.8	6.01	1.6e-10	519.277	3	488359	-0.99	VRDY	AAQTSPSPKAGAATGR		Abu@N-term	Q20170801-09	31.194	47	6.2e-08	1	529	56560.4	HUMAN	ATP synthase subunit beta, mitochondrial
[21]		P06576	ATPB_HUMAN	9	19.8	6.01	1.6e-10	486.261	2	245569	-1.4	VRDY	AAQTSPSPK		Abu@N-term	Q20170801-07	15.0308	47	9.4e-06	1	529	56560.4	HUMAN	ATP synthase subunit beta, mitochondrial
[21]		P06576	ATPB_HUMAN	9	19.8	6.01	1.6e-10	469.565	3	199304	0.34	NVAK	AHGGYSVFAGVGER			Q20170801-09	119.75	226	1.8e-05	1	529	56560.4	HUMAN	ATP synthase subunit beta, mitochondrial
[21]		P06576	ATPB_HUMAN	9	19.8	6.01	1.6e-10	801.408	2	78746	-1.3	ATSK	VALVYGQMNEPPGAR			Q20170801-09	144.635	265	3e-05	1	529	56560.4	HUMAN	ATP synthase subunit beta, mitochondrial
[22]		P04406	G3P_HUMAN	9	31.9	6.49	2.1e-11	765.905	2	75621	5	MAFR	VPTANVSVVDLTCR	Carbamidomethyl@13		Q20170801-09	157.934	235	2.1e-11	1	335	36053.5	HUMAN	Glyceraldehyde-3-phosphate dehydrogenase
[22]		P04406	G3P_HUMAN	9	31.9	6.49	2.1e-11	444.221	3	685763	0.088	YSNR	VVDLMAHMASKE			Q20170801-09	124.885	324	6e-11	1	335	36053.5	HUMAN	Glyceraldehyde-3-phosphate dehydrogenase
[22]		P04406	G3P_HUMAN	9	31.9	6.49	2.1e-11	405.887	3	1280000	-0.11	ATQK	TVDGPSGKLWR			Q20170801-07	101.292	187	1.5e-09	1	335	36053.5	HUMAN	Glyceraldehyde-3-phosphate dehydrogenase
[22]		P04406	G3P_HUMAN	9	31.9	6.49	2.1e-11	706.399	2	140211	0.31	RDGR	GALQNIIPASTGAAK			Q20170801-09	147.022	201	1.1e-08	1	335	36053.5	HUMAN	Glyceraldehyde-3-phosphate dehydrogenase
[22]		P04406	G3P_HUMAN	9	31.9	6.49	2.1e-11	406.575	3	218040	-0.22	-	MGKVKVGVNGFGR		Met-loss@1	Q20170801-07	78.6481	1	1.1e-08	1	335	36053.5	HUMAN	Glyceraldehyde-3-phosphate dehydrogenase
[22]		P04406	G3P_HUMAN	9	31.9	6.49	2.1e-11	882.409	2	79662	4.7	HFVK	LISWYDNEFGYSNR			Q20170801-07	183.675	310	2.7e-07	1	335	36053.5	HUMAN	Glyceraldehyde-3-phosphate dehydrogenase
[22]		P04406	G3P_HUMAN	9	31.9	6.49	2.1e-11	917.466	2	122039	2.5	NSLK	IISNASCTTNCLAPLAK	Carbamidomethyl@7;Carbamidomethyl@11		Q20170801-09	142.109	146	3.2e-07	1	335	36053.5	HUMAN	Glyceraldehyde-3-phosphate dehydrogenase
[22]		P04406	G3P_HUMAN	9	31.9	6.49	2.1e-11	435.259	2	333265	1.1	AVGK	VIPELNGK			Q20170801-09	86.1043	220	2.3e-05	1	335	36053.5	HUMAN	Glyceraldehyde-3-phosphate dehydrogenase
[22]		P04406	G3P_HUMAN	9	31.9	6.49	2.1e-11	515.27	3	208684	-1.6	ATQK	TVDGPSGKLWRDGR			Q20170801-09	89.0991	187	0.0025	1	335	36053.5	HUMAN	Glyceraldehyde-3-phosphate dehydrogenase
[23]		Q00610	CLH1_HUMAN	8	6.1	7.38	4.7e-13	971.962	2	259019	1.9	QALR	TSIDAYDNFDNISLAQR			Q20170801-09	179.154	1482	4.7e-13	1	1675	191616	HUMAN	Clathrin heavy chain 1
[23]		Q00610	CLH1_HUMAN	8	6.1	7.38	4.7e-13	497.592	3	627850	0.9	LFAQ	GNYSEAAKVAANAPK			Q20170801-07	91.0549	375	5.4e-13	1	1675	191616	HUMAN	Clathrin heavy chain 1
[23]		Q00610	CLH1_HUMAN	8	6.1	7.38	4.7e-13	667.82	2	337476	-0.3	ALAK	IYIDSNNNPER			Q20170801-09	80.1145	882	2.2e-11	1	1675	191616	HUMAN	Clathrin heavy chain 1
[23]		Q00610	CLH1_HUMAN	8	6.1	7.38	4.7e-13	677.986	3	70673	1.2	NSTR	TWKEVCFACVDGKEFR	Carbamidomethyl@6;Carbamidomethyl@9		Q20170801-09	156.794	1252	2.7e-07	1	1675	191616	HUMAN	Clathrin heavy chain 1
[23]		Q00610	CLH1_HUMAN	8	6.1	7.38	4.7e-13	648.84	2	202945	2.6	DAAK	LLYNNVSNFGR			Q20170801-09	145.751	1216	1e-05	1	1675	191616	HUMAN	Clathrin heavy chain 1
[23]		Q00610	CLH1_HUMAN	8	6.1	7.38	4.7e-13	506.922	3	159298	2.9	MFDR	HSSLAGCQIINYR	Carbamidomethyl@7		Q20170801-09	119.625	145	1.5e-05	1	1675	191616	HUMAN	Clathrin heavy chain 1
[23]		Q00610	CLH1_HUMAN	8	6.1	7.38	4.7e-13	618.836	2	835137	-1.2	KAGK	TLQIFNIEMK			Q20170801-09	186.437	87	2.3e-05	2	1675	191616	HUMAN	Clathrin heavy chain 1
[23]		Q00610	CLH1_HUMAN	8	6.1	7.38	4.7e-13	353.864	3	432295	-1.7	AACK	TGQIKEVER			Q20170801-09	27.3205	738	0.00047	2	1675	191616	HUMAN	Clathrin heavy chain 1
[24]		P00387	NB5R3_HUMAN	7	21.9	7.67	1.3e-13	690.575	4	187766	-2.1	LVLM	CGPPPMIQYACLPNLDHVGHPTER	Carbamidomethyl@1;Carbamidomethyl@11		Q20170801-07	177.965	274	1.3e-13	1	301	34235.2	HUMAN	NADH-cytochrome b5 reductase 3
[24]		P00387	NB5R3_HUMAN	7	21.9	7.67	1.3e-13	951.021	2	95081	0.011	RTVK	SVGMIAGGTGITPMLQVIR			Q20170801-07	198.425	174	3.4e-12	1	301	34235.2	HUMAN	NADH-cytochrome b5 reductase 3
[24]		P00387	NB5R3_HUMAN	7	21.9	7.67	1.3e-13	959.016	2	149825	-2.1	RTVK	SVGMIAGGTGITPMLQVIR		Oxidation@14'128	Q20170801-09	185.377	174	1.3e-11	1	301	34235.2	HUMAN	NADH-cytochrome b5 reductase 3
[24]		P00387	NB5R3_HUMAN	7	21.9	7.67	1.3e-13	489.936	3	233722	0.9	YPLR	LIDREIISHDTR			Q20170801-09	92.3695	47	1.4e-08	1	301	34235.2	HUMAN	NADH-cytochrome b5 reductase 3
[24]		P00387	NB5R3_HUMAN	7	21.9	7.67	1.3e-13	639.682	3	89724	0.49	RTVK	SVGMIAGGTGITPMLQVIR		Oxidation@4'58	Q20170801-07	192.411	174	3e-07	1	301	34235.2	HUMAN	NADH-cytochrome b5 reductase 3
[24]		P00387	NB5R3_HUMAN	7	21.9	7.67	1.3e-13	406.556	3	159574	0.1	AITL	ESPDIKYPLR			Q20170801-07	108.918	37	1.5e-06	1	301	34235.2	HUMAN	NADH-cytochrome b5 reductase 3
[24]		P00387	NB5R3_HUMAN	7	21.9	7.67	1.3e-13	406.728	4	435378	-0.48	YPLR	LIDREIISHDTRR			Q20170801-07	87.9054	47	0.0011	1	301	34235.2	HUMAN	NADH-cytochrome b5 reductase 3
[25]		P09874	PARP1_HUMAN	7	9.5	7.43	3.7e-13	869.375	2	326552	-0.25	LVFK	SDAYYCTGDVTAWTK	Carbamidomethyl@6		Q20170801-09	158.794	306	3.7e-13	1	1014	113085	HUMAN	Poly [ADP-ribose] polymerase 1
[25]		P09874	PARP1_HUMAN	7	9.5	7.43	3.7e-13	689.378	2	2090000	0.083	HGSR	TTNFAGILSQGLR			Q20170801-09	183.216	866	1.1e-10	1	1014	113085	HUMAN	Poly [ADP-ribose] polymerase 1
[25]		P09874	PARP1_HUMAN	7	9.5	7.43	3.7e-13	544.944	3	575553	0.12	KVKK	TAEAGGVTGKGQDGIGSK			Q20170801-09	47.407	88	1.1e-10	1	1014	113085	HUMAN	Poly [ADP-ribose] polymerase 1
[25]		P09874	PARP1_HUMAN	7	9.5	7.43	3.7e-13	593.294	2	1190000	1.4	KAEK	TLGDFAAEYAK			Q20170801-07	149.492	109	1.5e-10	1	1014	113085	HUMAN	Poly [ADP-ribose] polymerase 1
[25]		P09874	PARP1_HUMAN	7	9.5	7.43	3.7e-13	812.904	2	88660	-3.4	ANIR	VVSEDFLQDVSASTK			Q20170801-09	170.522	453	5e-07	1	1014	113085	HUMAN	Poly [ADP-ribose] polymerase 1
[25]		P09874	PARP1_HUMAN	7	9.5	7.43	3.7e-13	353.876	3	240223	-2	MIEK	LGGKLTGTANK			Q20170801-07	36.0656	415	1e-05	1	1014	113085	HUMAN	Poly [ADP-ribose] polymerase 1
[25]		P09874	PARP1_HUMAN	7	9.5	7.43	3.7e-13	528.954	3	580770	-1.3	CMVK	TQTPNRKEWVTPK			Q20170801-07	65.1811	325	2.4e-05	1	1014	113085	HUMAN	Poly [ADP-ribose] polymerase 1
[26]		Q9UQ35	SRRM2_HUMAN	7	3.4	7.37	4.7e-13	671.351	2	180070	0.7	ADSR	TPAAAAAMNLASPR			Q20170801-09	129.847	2261	4.7e-13	1	2752	299617	HUMAN	Serine/arginine repetitive matrix protein 2
[26]		Q9UQ35	SRRM2_HUMAN	7	3.4	7.37	4.7e-13	689.876	2	219077	1.1	SSSR	TPQAPASANLVGPR			Q20170801-09	108.062	2329	2.8e-10	1	2752	299617	HUMAN	Serine/arginine repetitive matrix protein 2
[26]		Q9UQ35	SRRM2_HUMAN	7	3.4	7.37	4.7e-13	713.388	2	194737	-0.49	ASAR	TPAIPTAVNLADSR			Q20170801-09	154.442	2247	1.4e-08	1	2752	299617	HUMAN	Serine/arginine repetitive matrix protein 2
[26]		Q9UQ35	SRRM2_HUMAN	7	3.4	7.37	4.7e-13	619.844	2	143087	-3.3	ADPR	TPTAPAVNLAGAR			Q20170801-09	116.235	2289	2.2e-08	1	2752	299617	HUMAN	Serine/arginine repetitive matrix protein 2
[26]		Q9UQ35	SRRM2_HUMAN	7	3.4	7.37	4.7e-13	650.865	2	396967	0.11	AGSR	TAAALAPASLTSAR			Q20170801-09	124.227	2357	1.6e-06	1	2752	299617	HUMAN	Serine/arginine repetitive matrix protein 2
[26]		Q9UQ35	SRRM2_HUMAN	7	3.4	7.37	4.7e-13	691.377	2	178795	3	ASPR	TAVAPSAVNLADPR			Q20170801-09	129.328	2275	1.8e-06	1	2752	299617	HUMAN	Serine/arginine repetitive matrix protein 2
[26]		Q9UQ35	SRRM2_HUMAN	7	3.4	7.37	4.7e-13	486.267	2	181371	-0.49	MSLR	TAPAANLASR			Q20170801-09	49.0702	2222	6.6e-06	1	2752	299617	HUMAN	Serine/arginine repetitive matrix protein 2
[27]		P11498	PYC_HUMAN	7	6.3	11.57	8.1e-21	579.274	3	1190000	-0.028	LGIR	TVAIYSEQDTGQMHR			Q20170801-07	99.0838	63	8.1e-21	1	1178	129635	HUMAN	Pyruvate carboxylase, mitochondrial
[27]		P11498	PYC_HUMAN	7	6.3	11.57	8.1e-21	586.307	2	619769	-0.75	GIRR	TSTAPAASPNVR			Q20170801-07	48.4269	19	2.2e-10	1	1178	129635	HUMAN	Pyruvate carboxylase, mitochondrial
[27]		P11498	PYC_HUMAN	7	6.3	11.57	8.1e-21	582.793	2	520764	-0.27	RHGK	HYFIEVNSR			Q20170801-09	105.693	320	1.1e-06	1	1178	129635	HUMAN	Pyruvate carboxylase, mitochondrial
[27]		P11498	PYC_HUMAN	7	6.3	11.57	8.1e-21	517.936	3	540779	1.7	DPAR	SFQPDTGRIEVFR			Q20170801-09	149.449	386	2.8e-06	1	1178	129635	HUMAN	Pyruvate carboxylase, mitochondrial
[27]		P11498	PYC_HUMAN	7	6.3	11.57	8.1e-21	672.828	2	98424	1.1	ACTR	GTPLDTEVPMER			Q20170801-09	134.788	819	1.1e-05	1	1178	129635	HUMAN	Pyruvate carboxylase, mitochondrial
[27]		P11498	PYC_HUMAN	7	6.3	11.57	8.1e-21	454.216	2	87231	-2.7	DPAR	SFQPDTGR			Q20170801-07	43.0525	386	6.3e-05	1	1178	129635	HUMAN	Pyruvate carboxylase, mitochondrial
[27]		P11498	PYC_HUMAN	7	6.3	11.57	8.1e-21	704.818	2	100	0.95	LSER	ADFAQACQDAGVR	Carbamidomethyl@7		Q20170801-09	99.2059	125	0.00036	1	1178	129635	HUMAN	Pyruvate carboxylase, mitochondrial
[28]		P42704	LPPRC_HUMAN	6	4.9	7.88	5.5e-14	699.027	3	620162	-0.016	ARLY	AIAAKEKDIQEESTFSSR		Abu@N-term	Q20170801-07	109.248	60	5.5e-14	1	1394	157906	HUMAN	Leucine-rich PPR motif-containing protein, mitochondrial
[28]		P42704	LPPRC_HUMAN	6	4.9	7.88	5.5e-14	675.897	2	118956	1.4	DTCR	SGGLGGSHALLLLR			Q20170801-09	158.356	115	3.1e-10	1	1394	157906	HUMAN	Leucine-rich PPR motif-containing protein, mitochondrial
[28]		P42704	LPPRC_HUMAN	6	4.9	7.88	5.5e-14	552.292	2	346022	0.89	LLLR	SCGSLLPELK	Carbamidomethyl@2		Q20170801-09	148.365	129	7.6e-10	1	1394	157906	HUMAN	Leucine-rich PPR motif-containing protein, mitochondrial
[28]		P42704	LPPRC_HUMAN	6	4.9	7.88	5.5e-14	670.676	3	81028	-0.042	ARLY	AIAAKEKDIQEESTFSSR			Q20170801-09	94.1397	60	2.4e-09	1	1394	157906	HUMAN	Leucine-rich PPR motif-containing protein, mitochondrial
[28]		P42704	LPPRC_HUMAN	6	4.9	7.88	5.5e-14	636.83	2	109243	-1.1	TTLK	TVLDQQQTPSR			Q20170801-07	63.524	1129	2.2e-08	1	1394	157906	HUMAN	Leucine-rich PPR motif-containing protein, mitochondrial
[28]		P42704	LPPRC_HUMAN	6	4.9	7.88	5.5e-14	848.913	2	39045	-1	TYQR	LIASYCNVGDIEGASK	Carbamidomethyl@6		Q20170801-07	149.824	203	1.8e-07	1	1394	157906	HUMAN	Leucine-rich PPR motif-containing protein, mitochondrial
[29]		P26641	EF1G_HUMAN	9	16.9	5.52	1.1e-09	621.331	2	619983	1.5	HLPK	STFVLDEFKR			Q20170801-09	149.132	286	1.1e-09	1	437	50119.2	HUMAN	Elongation factor 1-gamma
[29]		P26641	EF1G_HUMAN	9	16.9	5.52	1.1e-09	674.372	2	162633	-0.18	RAFK	ALIAAQYSGAQVR			Q20170801-09	124.505	18	1.2e-08	1	437	50119.2	HUMAN	Elongation factor 1-gamma
[29]		P26641	EF1G_HUMAN	9	16.9	5.52	1.1e-09	712.36	2	71606	-1.4	TNRW	FLTCINQPQFR	Carbamidomethyl@4		Q20170801-09	158.488	191	2.2e-07	1	437	50119.2	HUMAN	Elongation factor 1-gamma
[29]		P26641	EF1G_HUMAN	9	16.9	5.52	1.1e-09	457.254	3	164360	-0.13	HLPK	STFVLDEFKRK			Q20170801-07	131.691	286	4.6e-07	1	437	50119.2	HUMAN	Elongation factor 1-gamma
[29]		P26641	EF1G_HUMAN	9	16.9	5.52	1.1e-09	483.228	2	331138	1.1	GTLY	TYPENWR			Q20170801-09	85.3396	8	8.2e-07	1	437	50119.2	HUMAN	Elongation factor 1-gamma
[29]		P26641	EF1G_HUMAN	9	16.9	5.52	1.1e-09	543.28	2	128017	1.2	HLPK	STFVLDEFK			Q20170801-09	168.087	286	2.5e-06	1	437	50119.2	HUMAN	Elongation factor 1-gamma
[29]		P26641	EF1G_HUMAN	9	16.9	5.52	1.1e-09	351.534	3	215008	0.13	HVGK	AFNQGKIFK			Q20170801-09	85.8175	429	5.8e-06	1	437	50119.2	HUMAN	Elongation factor 1-gamma
[29]		P26641	EF1G_HUMAN	9	16.9	5.52	1.1e-09	722.867	2	62697	-0.34	TWRK	LDPGSEETQTLVR			Q20170801-09	117.273	402	0.00011	1	437	50119.2	HUMAN	Elongation factor 1-gamma
[29]		P26641	EF1G_HUMAN	9	16.9	5.52	1.1e-09	375.214	3	318997	0.68	AEPK	AKDPFAHLPK			Q20170801-09	91.0613	276	0.0017	1	437	50119.2	HUMAN	Elongation factor 1-gamma
[30]		P10809	CH60_HUMAN	8	12.2	5.96	2e-10	672.862	2	1630000	0.054	PKGR	TVIIEQSWGSPK			Q20170801-09	143.177	61	2e-10	1	573	61055.2	HUMAN	60 kDa heat shock protein, mitochondrial
[30]		P10809	CH60_HUMAN	8	12.2	5.96	2e-10	752.882	2	557103	0.78	KDGK	TLNDELEIIEGMK			Q20170801-09	191.955	206	3.2e-10	1	573	61055.2	HUMAN	60 kDa heat shock protein, mitochondrial
[30]		P10809	CH60_HUMAN	8	12.2	5.96	2e-10	593.865	2	437794	0.25	IIKR	TLKIPAMTIAK			Q20170801-09	145.797	471	1.2e-07	1	573	61055.2	HUMAN	60 kDa heat shock protein, mitochondrial
[30]		P10809	CH60_HUMAN	8	12.2	5.96	2e-10	365.201	3	434980	-0.54	VLAR	SIAKEGFEK		Abu@N-term	Q20170801-07	64.3122	122	9.4e-07	1	573	61055.2	HUMAN	60 kDa heat shock protein, mitochondrial
[30]		P10809	CH60_HUMAN	8	12.2	5.96	2e-10	501.303	2	232899	-0.25	VGRK	GVITVKDGK		Abu@N-term	Q20170801-09	48.4845	197	2.5e-06	1	573	61055.2	HUMAN	60 kDa heat shock protein, mitochondrial
[30]		P10809	CH60_HUMAN	8	12.2	5.96	2e-10	398.896	3	495208	0.048	TVAK	SIDLKDKYK		Abu@N-term	Q20170801-07	76.0315	83	2.6e-06	1	573	61055.2	HUMAN	60 kDa heat shock protein, mitochondrial
[30]		P10809	CH60_HUMAN	8	12.2	5.96	2e-10	394.72	2	149708	-0.93	ADAV	AVTMGPK		Abu@N-term	Q20170801-09	47.3006	52	0.00084	1	573	61055.2	HUMAN	60 kDa heat shock protein, mitochondrial
[30]		P10809	CH60_HUMAN	8	12.2	5.96	2e-10	504.771	2	74925	-0.51	VLAR	SIAKEGFEK			Q20170801-09	43.0867	122	0.011	1	573	61055.2	HUMAN	60 kDa heat shock protein, mitochondrial
[31]		P60174	TPIS_HUMAN	6	22.4	7.53	2.4e-13	663.84	2	1070000	0.074	QSTR	IIYGGSVTGATCK	Carbamidomethyl@12		Q20170801-09	99.9016	244	2.4e-13	1	286	30791.3	HUMAN	Triosephosphate isomerase
[31]		P60174	TPIS_HUMAN	6	22.4	7.53	2.4e-13	489.579	3	320558	-0.51	GTGK	TATPQQAQEVHEK			Q20170801-07	33.4883	213	1.8e-11	1	286	30791.3	HUMAN	Triosephosphate isomerase
[31]		P60174	TPIS_HUMAN	6	22.4	7.53	2.4e-13	617.804	2	540094	-1.8	GWLK	SNVSDAVAQSTR			Q20170801-09	64.3836	232	2.6e-09	1	286	30791.3	HUMAN	Triosephosphate isomerase
[31]		P60174	TPIS_HUMAN	6	22.4	7.53	2.4e-13	577.321	3	485837	-0.15	FLVG	GASLKPEFVDIINAKQ			Q20170801-07	170.338	271	5.6e-08	1	286	30791.3	HUMAN	Triosephosphate isomerase
[31]		P60174	TPIS_HUMAN	6	22.4	7.53	2.4e-13	477.745	2	118742	0.16	PSRK	FFVGGNWK			Q20170801-07	152.306	44	7.9e-06	1	286	30791.3	HUMAN	Triosephosphate isomerase
[31]		P60174	TPIS_HUMAN	6	22.4	7.53	2.4e-13	579.308	3	129657	0.47	GTGK	TATPQQAQEVHEKLR			Q20170801-09	66.1388	213	1.9e-05	1	286	30791.3	HUMAN	Triosephosphate isomerase
[32]		Q08211	DHX9_HUMAN	7	5.4	6.46	2.4e-11	611.364	2	481114	0.31	EMFR	TPLHEIALSIK			Q20170801-09	145.23	796	2.4e-11	1	1270	140960	HUMAN	ATP-dependent RNA helicase A
[32]		Q08211	DHX9_HUMAN	7	5.4	6.46	2.4e-11	1025.52	2	126418	1.4	GCGK	TTQVPQFILDDFIQNDR			Q20170801-09	203.202	418	6.6e-11	1	1270	140960	HUMAN	ATP-dependent RNA helicase A
[32]		Q08211	DHX9_HUMAN	7	5.4	6.46	2.4e-11	743.817	2	68928	-2	LIHK	SSVNCPFSSQDMK	Carbamidomethyl@5		Q20170801-09	105.626	1025	1.8e-08	1	1270	140960	HUMAN	ATP-dependent RNA helicase A
[32]		Q08211	DHX9_HUMAN	7	5.4	6.46	2.4e-11	650.838	2	243702	0.83	DRAA	ECNIVVTQPR	Carbamidomethyl@2	Abu@N-term	Q20170801-09	109.166	437	2e-07	1	1270	140960	HUMAN	ATP-dependent RNA helicase A
[32]		Q08211	DHX9_HUMAN	7	5.4	6.46	2.4e-11	679.347	2	100	-1.1	QNDR	AAECNIVVTQPR	Carbamidomethyl@4		Q20170801-09	93.901	435	9.8e-06	1	1270	140960	HUMAN	ATP-dependent RNA helicase A
[32]		Q08211	DHX9_HUMAN	7	5.4	6.46	2.4e-11	383.916	3	257824	-0.57	PLGR	ILAKLPIEPR			Q20170801-09	137.391	854	1.6e-05	1	1270	140960	HUMAN	ATP-dependent RNA helicase A
[32]		Q08211	DHX9_HUMAN	7	5.4	6.46	2.4e-11	389.209	2	380045	0.18	VNER	MLNMIR			Q20170801-09	106.225	1131	0.017	1	1270	140960	HUMAN	ATP-dependent RNA helicase A
[33]		P50395	GDIB_HUMAN	5	13.9	8.85	8.8e-16	639.944	3	484216	0.052	FISR	TYDATTHFETTCDDIK	Carbamidomethyl@12		Q20170801-09	118.487	403	8.8e-16	1	445	50663.7	HUMAN	Rab GDP dissociation inhibitor beta
[33]		P50395	GDIB_HUMAN	5	13.9	8.85	8.8e-16	951.911	2	133272	-0.95	ALYR	TDDYLDQPCYETINR	Carbamidomethyl@9		Q20170801-07	150.316	194	5.4e-14	1	445	50663.7	HUMAN	Rab GDP dissociation inhibitor beta
[33]		P50395	GDIB_HUMAN	5	13.9	8.85	8.8e-16	648.806	4	217116	0.14	FISR	TYDATTHFETTCDDIKNIYKR	Carbamidomethyl@12		Q20170801-07	149.912	403	1.6e-08	1	445	50663.7	HUMAN	Rab GDP dissociation inhibitor beta
[33]		P50395	GDIB_HUMAN	5	13.9	8.85	8.8e-16	536.235	3	346580	1.7	IYKR	MTGSEFDFEEMKR			Q20170801-09	143.021	424	7.2e-06	1	445	50663.7	HUMAN	Rab GDP dissociation inhibitor beta
[33]		P50395	GDIB_HUMAN	5	13.9	8.85	8.8e-16	468.245	3	261482	3.2	LYKR	FKIPGSPPESMGR			Q20170801-09	133.084	56	2.4e-05	1	445	50663.7	HUMAN	Rab GDP dissociation inhibitor beta
[34]		Q99832	TCPH_HUMAN	9	16.9	7.18	8.4e-14	703.326	2	786909	-0.63	AFKK	TFSYAGFEMQPK			Q20170801-09	164.233	219	8.4e-14	1	543	59367.2	HUMAN	T-complex protein 1 subunit eta
[34]		Q99832	TCPH_HUMAN	9	16.9	7.18	8.4e-14	759.023	3	97720	2.8	PKAK	TCTFILRGGAEQFMEETER	Carbamidomethyl@2		Q20170801-09	179.068	369	1.7e-08	1	543	59367.2	HUMAN	T-complex protein 1 subunit eta
[34]		Q99832	TCPH_HUMAN	9	16.9	7.18	8.4e-14	534.319	3	459423	1.1	DYSR	TIPGKQQLLIGAYAK			Q20170801-09	143.79	426	2.2e-08	1	543	59367.2	HUMAN	T-complex protein 1 subunit eta
[34]		Q99832	TCPH_HUMAN	9	16.9	7.18	8.4e-14	567.258	2	131076	-0.31	GGER	YNFFTGCPK	Carbamidomethyl@7		Q20170801-09	139.76	358	4.7e-07	1	543	59367.2	HUMAN	T-complex protein 1 subunit eta
[34]		Q99832	TCPH_HUMAN	9	16.9	7.18	8.4e-14	354.882	3	212300	0.23	TILK	LLDVVHPAAK			Q20170801-09	95.3709	68	7.6e-06	1	543	59367.2	HUMAN	T-complex protein 1 subunit eta
[34]		Q99832	TCPH_HUMAN	9	16.9	7.18	8.4e-14	368.535	3	128444	1.6	LGPR	GMDKLIVDGR			Q20170801-09	101.324	44	9e-05	1	543	59367.2	HUMAN	T-complex protein 1 subunit eta
[34]		Q99832	TCPH_HUMAN	9	16.9	7.18	8.4e-14	385.55	3	329358	-0.74	ETER	SLHDAIMIVR			Q20170801-09	136.718	388	0.0023	1	543	59367.2	HUMAN	T-complex protein 1 subunit eta
[34]		Q99832	TCPH_HUMAN	9	16.9	7.18	8.4e-14	380.234	2	3060000	-0.24	PAAK	TLVDIAK			Q20170801-09	92.231	78	0.024	2	543	59367.2	HUMAN	T-complex protein 1 subunit eta
[34]		Q99832	TCPH_HUMAN	9	16.9	7.18	8.4e-14	455.745	2	310853	0.28	PKAK	TCTFILR	Carbamidomethyl@2		Q20170801-09	121.271	369	0.035	1	543	59367.2	HUMAN	T-complex protein 1 subunit eta
[35]		P46821	MAP1B_HUMAN	5	2.8	7.38	1.5e-13	787.847	2	63556	0.16	KTTR	TPEEGGYSYDISEK			Q20170801-09	110.618	1949	1.5e-13	1	2468	270637	HUMAN	Microtubule-associated protein 1B
[35]		P46821	MAP1B_HUMAN	5	2.8	7.38	1.5e-13	772.859	2	73316	-0.55	ISEK	TTSPPEVSGYSYEK			Q20170801-09	108.713	1963	3.5e-11	1	2468	270637	HUMAN	Microtubule-associated protein 1B
[35]		P46821	MAP1B_HUMAN	5	2.8	7.38	1.5e-13	803.696	3	97239	-1.7	VKEK	TATCHSSSSPPIDAASAEPYGFR	Carbamidomethyl@4		Q20170801-09	139.826	1811	4.7e-10	1	2468	270637	HUMAN	Microtubule-associated protein 1B
[35]		P46821	MAP1B_HUMAN	5	2.8	7.38	1.5e-13	833.349	2	42920	-2.7	KTTR	TPDTSTYCYETAEK	Carbamidomethyl@8		Q20170801-09	91.5178	2034	1.2e-09	1	2468	270637	HUMAN	Microtubule-associated protein 1B
[35]		P46821	MAP1B_HUMAN	5	2.8	7.38	1.5e-13	644.965	3	62913	-0.41	IIEK	TTRTPEEGGYSYDISEK			Q20170801-09	102.142	1946	1.3e-06	1	2468	270637	HUMAN	Microtubule-associated protein 1B
[36]		P50990	TCPQ_HUMAN	6	11.9	7.6	1.8e-13	795.375	3	336641	0.36	VLIK	TAEELMNFSKGEENLMDAQVK			Q20170801-09	178.54	261	1.8e-13	1	548	59621.1	HUMAN	T-complex protein 1 subunit theta
[36]		P50990	TCPQ_HUMAN	6	11.9	7.6	1.8e-13	526.745	2	308320	0.22	QTTR	TAYGPNGMNK			Q20170801-09	46.7211	45	3.9e-09	1	548	59621.1	HUMAN	T-complex protein 1 subunit theta
[36]		P50990	TCPQ_HUMAN	6	11.9	7.6	1.8e-13	585.279	2	179705	-0.32	VLIK	TAEELMNFSK			Q20170801-09	132.155	261	1.5e-08	1	548	59621.1	HUMAN	T-complex protein 1 subunit theta
[36]		P50990	TCPQ_HUMAN	6	11.9	7.6	1.8e-13	654.322	2	152199	-0.42	EGAK	HFSGLEEAVYR			Q20170801-07	129.856	21	2.7e-08	1	548	59621.1	HUMAN	T-complex protein 1 subunit theta
[36]		P50990	TCPQ_HUMAN	6	11.9	7.6	1.8e-13	677.883	2	101524	0.93	RDKR	LVPGGGATEIELAK			Q20170801-09	141.123	408	6.1e-05	1	548	59621.1	HUMAN	T-complex protein 1 subunit theta
[36]		P50990	TCPQ_HUMAN	6	11.9	7.6	1.8e-13	443.261	2	1110000	0.031	RLCK	TVGATALPR			Q20170801-09	73.944	327	8e-05	1	548	59621.1	HUMAN	T-complex protein 1 subunit theta
[37]		P35527	K1C9_HUMAN	6	6.9	6.9	3.6e-12	733.653	3	40222	0.35	SYSR	FSSSGGGGGGGRFSSSSGYGGGSSR			Q20170801-09	74.2022	35	3.6e-12	1	623	62064.8	HUMAN	Keratin, type I cytoskeletal 9
[37]		P35527	K1C9_HUMAN	6	6.9	6.9	3.6e-12	616.802	2	201103	-0.34	YLSR	SGGGGGGGLGSGGSIR			Q20170801-09	50.8531	14	6.5e-12	1	623	62064.8	HUMAN	Keratin, type I cytoskeletal 9
[37]		P35527	K1C9_HUMAN	6	6.9	6.9	3.6e-12	573.286	2	130529	-1.4	LSRS	GGGGGGGLGSGGSIR			Q20170801-07	51.4633	15	7.7e-09	1	623	62064.8	HUMAN	Keratin, type I cytoskeletal 9
[37]		P35527	K1C9_HUMAN	6	6.9	6.9	3.6e-12	492.582	3	726720	-0.4	SSYL	SRSGGGGGGGLGSGGSIR			Q20170801-09	39.16	12	1.1e-06	1	623	62064.8	HUMAN	Keratin, type I cytoskeletal 9
[37]		P35527	K1C9_HUMAN	6	6.9	6.9	3.6e-12	544.775	2	47684	-1.2	SRSG	GGGGGGLGSGGSIR			Q20170801-09	49.3295	16	0.00013	1	623	62064.8	HUMAN	Keratin, type I cytoskeletal 9
[37]		P35527	K1C9_HUMAN	6	6.9	6.9	3.6e-12	516.265	2	55226	0.66	RSGG	GGGGGLGSGGSIR			Q20170801-09	48.169	17	0.0065	1	623	62064.8	HUMAN	Keratin, type I cytoskeletal 9
[38]		P09651	ROA1_HUMAN	4	13.4	8.04	2.8e-14	814.894	2	167270	-0.7	FGGR	SSGPYGGGGQYFAKPR			Q20170801-09	98.7745	337	2.8e-14	1	372	38746.9	HUMAN	Heterogeneous nuclear ribonucleoprotein A1
[38]		P09651	ROA1_HUMAN	4	13.4	8.04	2.8e-14	847.852	2	48331	-1.5	AKPR	NQGGYGGSSSSSSYGSGR			Q20170801-07	44.1399	353	1e-11	1	372	38746.9	HUMAN	Heterogeneous nuclear ribonucleoprotein A1
[38]		P09651	ROA1_HUMAN	4	13.4	8.04	2.8e-14	666.627	3	543667	-1.1	AKPR	NQGGYGGSSSSSSYGSGRRF			Q20170801-07	78.8257	353	8.5e-11	1	372	38746.9	HUMAN	Heterogeneous nuclear ribonucleoprotein A1
[38]		P09651	ROA1_HUMAN	4	13.4	8.04	2.8e-14	519.602	3	899198	0.17	-	MSKSESPKEPEQLR		Met-loss+Acetyl@1	Q20170801-09	58.6056	1	2.8e-09	1	372	38746.9	HUMAN	Heterogeneous nuclear ribonucleoprotein A1
[39]		P07195	LDHB_HUMAN	6	15.3	6.38	3.3e-11	766.901	2	266550	0.016	QLKK	SADTLWDIQKDLK			Q20170801-09	171.322	320	3.3e-11	1	334	36638.8	HUMAN	L-lactate dehydrogenase B chain
[39]		P07195	LDHB_HUMAN	6	15.3	6.38	3.3e-11	504.264	3	265447	1.7	QTPK	IVADKDYSVTANSK			Q20170801-09	69.9051	78	8.8e-10	1	334	36638.8	HUMAN	L-lactate dehydrogenase B chain
[39]		P07195	LDHB_HUMAN	6	15.3	6.38	3.3e-11	624.803	2	444521	-0.37	PKHR	VIGSGCNLDSAR	Carbamidomethyl@6		Q20170801-09	76.2661	159	1.6e-09	4	334	36638.8	HUMAN	L-lactate dehydrogenase B chain
[39]		P07195	LDHB_HUMAN	6	15.3	6.38	3.3e-11	880.957	2	89659	0.46	QLKK	SADTLWDIQKDLKDL			Q20170801-09	198.508	320	4.5e-07	1	334	36638.8	HUMAN	L-lactate dehydrogenase B chain
[39]		P07195	LDHB_HUMAN	6	15.3	6.38	3.3e-11	514.592	3	95731	0.66	GLPK	HRVIGSGCNLDSAR	Carbamidomethyl@8		Q20170801-09	62.4269	157	0.0021	1	334	36638.8	HUMAN	L-lactate dehydrogenase B chain
[39]		P07195	LDHB_HUMAN	6	15.3	6.38	3.3e-11	353.188	3	113948	0.73	DSAR	FRYLMAEK			Q20170801-09	104.533	171	0.015	1	334	36638.8	HUMAN	L-lactate dehydrogenase B chain
[39-1]	2	P00338	LDHA_HUMAN	3	7.8	5.59	9.6e-10	818.42	2	125146	-3.2	RLKK	SADTLWGIQKELQF			Q20170801-09	199.351	319	9.6e-10	1	332	36689.1	HUMAN	L-lactate dehydrogenase A chain
[39-1]	2	P00338	LDHA_HUMAN	3	7.8	5.59	9.6e-10	624.803	2	444521	-0.37	PKNR	VIGSGCNLDSAR	Carbamidomethyl@6		Q20170801-09	76.2661	158	1.6e-09	4	332	36689.1	HUMAN	L-lactate dehydrogenase A chain
[39-1]	2	P00338	LDHA_HUMAN	3	7.8	5.59	9.6e-10	559.796	2	501296	0.28	RLKK	SADTLWGIQK			Q20170801-09	137.813	319	3.5e-05	1	332	36689.1	HUMAN	L-lactate dehydrogenase A chain
[40]		P62937	PPIA_HUMAN	6	38.8	5.98	3.3e-11	799.878	2	90023	1.8	CFHR	IIPGFMCQGGDFTR	Carbamidomethyl@7		Q20170801-09	174.148	56	3.3e-11	2	165	18012.7	HUMAN	Peptidyl-prolyl cis-trans isomerase A
[40]		P62937	PPIA_HUMAN	6	38.8	5.98	3.3e-11	439.205	3	787410	0.22	TGEK	GFGYKGSCFHR	Carbamidomethyl@8		Q20170801-09	79.3479	45	3.9e-10	1	165	18012.7	HUMAN	Peptidyl-prolyl cis-trans isomerase A
[40]		P62937	PPIA_HUMAN	6	38.8	5.98	3.3e-11	611.309	3	302460	0.022	TGGK	SIYGEKFEDENFILK			Q20170801-09	174.205	77	3.9e-09	1	165	18012.7	HUMAN	Peptidyl-prolyl cis-trans isomerase A
[40]		P62937	PPIA_HUMAN	6	38.8	5.98	3.3e-11	505.937	3	1320000	0.48	CTAK	TEWLDGKHVVFGK			Q20170801-09	139.935	119	6.6e-09	1	165	18012.7	HUMAN	Peptidyl-prolyl cis-trans isomerase A
[40]		P62937	PPIA_HUMAN	6	38.8	5.98	3.3e-11	624.32	2	94367	2.9	KTSK	KITIADCGQLE	Carbamidomethyl@7		Q20170801-07	123.737	155	4.8e-05	1	165	18012.7	HUMAN	Peptidyl-prolyl cis-trans isomerase A
[40]		P62937	PPIA_HUMAN	6	38.8	5.98	3.3e-11	424.711	2	376591	0.73	CTAK	TEWLDGK			Q20170801-09	84.6039	119	0.00034	7	165	18012.7	HUMAN	Peptidyl-prolyl cis-trans isomerase A
[41]		Q00839	HNRPU_HUMAN	7	8.5	5.91	1.7e-12	857.957	2	134547	-2.9	AAGK	SSGPTSLFAVTVAPPGAR			Q20170801-07	182.744	187	1.7e-12	1	825	90585.2	HUMAN	Heterogeneous nuclear ribonucleoprotein U
[41]		Q00839	HNRPU_HUMAN	7	8.5	5.91	1.7e-12	566.599	3	306754	1.5	DHGR	GYFEYIEENKYSR			Q20170801-09	152.559	256	7.4e-11	1	825	90585.2	HUMAN	Heterogeneous nuclear ribonucleoprotein U
[41]		Q00839	HNRPU_HUMAN	7	8.5	5.91	1.7e-12	512.3	2	45017	-1.4	TSLF	AVTVAPPGAR		Abu@N-term	Q20170801-07	88.5543	195	9.5e-07	1	825	90585.2	HUMAN	Heterogeneous nuclear ribonucleoprotein U
[41]		Q00839	HNRPU_HUMAN	7	8.5	5.91	1.7e-12	595.294	2	212929	0.38	EPGN	GSLDLGGDSAGR		Abu@N-term	Q20170801-09	88.9355	58	4.8e-06	1	825	90585.2	HUMAN	Heterogeneous nuclear ribonucleoprotein U
[41]		Q00839	HNRPU_HUMAN	7	8.5	5.91	1.7e-12	666.354	2	130795	3.7	PEEY	TFIQNVPLEDR			Q20170801-09	152.388	474	6.6e-06	1	825	90585.2	HUMAN	Heterogeneous nuclear ribonucleoprotein U
[41]		Q00839	HNRPU_HUMAN	7	8.5	5.91	1.7e-12	494.277	2	168269	0.55	-	MSSSPVNVKK		Met-loss+Acetyl@1	Q20170801-09	41.8104	1	3.8e-05	1	825	90585.2	HUMAN	Heterogeneous nuclear ribonucleoprotein U
[41]		Q00839	HNRPU_HUMAN	7	8.5	5.91	1.7e-12	368.205	2	675256	0.2	GAGK	TTWVTK			Q20170801-09	47.8863	511	0.0054	1	825	90585.2	HUMAN	Heterogeneous nuclear ribonucleoprotein U
[42]		P05783	K1C18_HUMAN	5	6.5	7.56	2.2e-13	784.886	2	625707	-1.1	GARP	VSSAASVYAGAGGSGSR		Abu@N-term	Q20170801-09	87.451	29	2.2e-13	1	430	48058.2	HUMAN	Keratin, type I cytoskeletal 18
[42]		P05783	K1C18_HUMAN	5	6.5	7.56	2.2e-13	742.359	2	41226	-2.5	GARP	VSSAASVYAGAGGSGSR			Q20170801-09	75.1792	29	1.1e-10	1	430	48058.2	HUMAN	Keratin, type I cytoskeletal 18
[42]		P05783	K1C18_HUMAN	5	6.5	7.56	2.2e-13	691.836	2	148069	-0.68	RPVS	SAASVYAGAGGSGSR		Abu@N-term	Q20170801-09	74.2993	31	1.7e-09	1	430	48058.2	HUMAN	Keratin, type I cytoskeletal 18
[42]		P05783	K1C18_HUMAN	5	6.5	7.56	2.2e-13	649.311	2	25615	0.77	RPVS	SAASVYAGAGGSGSR			Q20170801-09	53.3134	31	5.9e-05	1	430	48058.2	HUMAN	Keratin, type I cytoskeletal 18
[42]		P05783	K1C18_HUMAN	5	6.5	7.56	2.2e-13	894.78	3	76029	1.2	RSLG	SVQAPSYGARPVSSAASVYAGAGGSGSR		Abu@N-term	Q20170801-07	141.754	18	0.0006	1	430	48058.2	HUMAN	Keratin, type I cytoskeletal 18
[43]		O00267	SPT5H_HUMAN	3	4.2	10.02	6e-18	860.377	2	135929	0.31	TYGR	TPMYGSQTPMYGSGSR			Q20170801-09	115.571	768	6e-18	1	1087	121001	HUMAN	Transcription elongation factor SPT5
[43]		O00267	SPT5H_HUMAN	3	4.2	10.02	6e-18	819.382	2	190682	-1.3	SGSR	TPMYGSQTPLQDGSR			Q20170801-09	111.57	784	3.8e-17	1	1087	121001	HUMAN	Transcription elongation factor SPT5
[43]		O00267	SPT5H_HUMAN	3	4.2	10.02	6e-18	413.95	4	195013	-0.43	DGSR	TPHYGSQTPLHDGSR			Q20170801-09	56.0796	799	1e-07	1	1087	121001	HUMAN	Transcription elongation factor SPT5
[44]		P15880	RS2_HUMAN	6	22.2	5.56	1e-10	488.577	3	258232	1	VFTK	SPYQEFTDHLVK			Q20170801-09	151.802	264	1e-10	1	293	31324.7	HUMAN	40S ribosomal protein S2
[44]		P15880	RS2_HUMAN	6	22.2	5.56	1e-10	570.278	2	186860	-2.7	TSAR	GCTATLGNFAK	Carbamidomethyl@2		Q20170801-09	102.609	228	7.9e-09	1	293	31324.7	HUMAN	40S ribosomal protein S2
[44]		P15880	RS2_HUMAN	6	22.2	5.56	1e-10	693.851	2	763487	0.088	AISK	TYSYLTPDLWK			Q20170801-09	184.254	247	2.6e-08	1	293	31324.7	HUMAN	40S ribosomal protein S2
[44]		P15880	RS2_HUMAN	6	22.2	5.56	1e-10	714.893	2	186023	-0.7	THTR	VSVQRTQAPAVATT			Q20170801-09	86.0391	280	1.1e-06	1	293	31324.7	HUMAN	40S ribosomal protein S2
[44]		P15880	RS2_HUMAN	6	22.2	5.56	1e-10	698.026	3	168402	-0.52	AISK	TYSYLTPDLWKETVFTK			Q20170801-09	193.256	247	3e-06	1	293	31324.7	HUMAN	40S ribosomal protein S2
[44]		P15880	RS2_HUMAN	6	22.2	5.56	1e-10	513.302	2	354432	-1.4	PAPR	GTGIVSAPVPK			Q20170801-09	100.943	201	2.3e-05	1	293	31324.7	HUMAN	40S ribosomal protein S2
[45]		Q9Y490	TLN1_HUMAN	4	2.4	9.05	3.7e-16	918.392	2	225048	0.34	NVVK	TMQFEPSTMVYDACR	Carbamidomethyl@14		Q20170801-09	170.545	16	3.7e-16	1	2541	269769	HUMAN	Talin-1
[45]		Q9Y490	TLN1_HUMAN	4	2.4	9.05	3.7e-16	724.383	2	587480	0.48	ISAK	TMLESAGGLIQTAR			Q20170801-09	161.564	1605	1.9e-09	1	2541	269769	HUMAN	Talin-1
[45]		Q9Y490	TLN1_HUMAN	4	2.4	9.05	3.7e-16	570.968	3	558108	3.5	AASK	TLSHPQQMALLDQTK			Q20170801-09	126.695	1752	2.2e-08	1	2541	269769	HUMAN	Talin-1
[45]		Q9Y490	TLN1_HUMAN	4	2.4	9.05	3.7e-16	641.683	3	151977	2.3	DHGR	TLREQGVEEHETLLLR			Q20170801-09	129.254	179	5.3e-07	1	2541	269769	HUMAN	Talin-1
[46]		Q14697	GANAB_HUMAN	7	8.5	8.67	1.7e-17	652.272	2	17287	-2.9	SNFK	TCEESSFCKR	Carbamidomethyl@2;Carbamidomethyl@8		Q20170801-09	31.9012	40	1.7e-17	1	944	106875	HUMAN	Neutral alpha-glucosidase AB
[46]		Q14697	GANAB_HUMAN	7	8.5	8.67	1.7e-17	560.987	3	465150	2.1	RRPR	YRVPDVLVADPPIAR			Q20170801-09	172.513	113	2.6e-07	1	944	106875	HUMAN	Neutral alpha-glucosidase AB
[46]		Q14697	GANAB_HUMAN	7	8.5	8.67	1.7e-17	440.565	3	862370	-5.9	LRQR	SGGMERPFVLAR			Q20170801-09	122.678	591	5.1e-07	1	944	106875	HUMAN	Neutral alpha-glucosidase AB
[46]		Q14697	GANAB_HUMAN	7	8.5	8.67	1.7e-17	580.981	3	173336	0.48	PESR	LSFQHDPETSVLVLR			Q20170801-09	170.45	915	5.3e-07	1	944	106875	HUMAN	Neutral alpha-glucosidase AB
[46]		Q14697	GANAB_HUMAN	7	8.5	8.67	1.7e-17	392.212	3	241565	-0.37	NMTR	FRIDELEPR			Q20170801-09	144.296	101	4.5e-05	1	944	106875	HUMAN	Neutral alpha-glucosidase AB
[46]		Q14697	GANAB_HUMAN	7	8.5	8.67	1.7e-17	486.797	2	818592	3.2	LEDR	SLLLSVNAR			Q20170801-09	135.617	165	0.00043	1	944	106875	HUMAN	Neutral alpha-glucosidase AB
[46]		Q14697	GANAB_HUMAN	7	8.5	8.67	1.7e-17	573.324	2	100	-2.3	KRQR	SIRPGLSPYR			Q20170801-09	89.5977	52	0.0014	1	944	106875	HUMAN	Neutral alpha-glucosidase AB
[47]		O43390	HNRPR_HUMAN	4	5.7	7.1	1.5e-12	656.331	2	342698	0.43	LLER	TGYTLDVTTGQR			Q20170801-07	116.828	134	1.5e-12	2	633	70943.6	HUMAN	Heterogeneous nuclear ribonucleoprotein R
[47]		O43390	HNRPR_HUMAN	4	5.7	7.1	1.5e-12	720.378	2	64201	-0.5	LLER	TGYTLDVTTGQRK			Q20170801-09	92.1923	134	1.1e-10	2	633	70943.6	HUMAN	Heterogeneous nuclear ribonucleoprotein R
[47]		O43390	HNRPR_HUMAN	4	5.7	7.1	1.5e-12	506.753	2	99989	3.6	VQNK	SAFLCGVMK	Carbamidomethyl@5		Q20170801-09	141.81	95	1.7e-08	2	633	70943.6	HUMAN	Heterogeneous nuclear ribonucleoprotein R
[47]		O43390	HNRPR_HUMAN	4	5.7	7.1	1.5e-12	586.931	3	244610	1.2	QASR	STAYEDYYYHPPPR			Q20170801-09	121.302	428	5.8e-07	1	633	70943.6	HUMAN	Heterogeneous nuclear ribonucleoprotein R
[48]		P13010	XRCC5_HUMAN	7	10.9	5.26	2.9e-10	653.347	3	252305	1.2	KDEK	TDTLEDLFPTTKIPNPR			Q20170801-09	183.727	470	2.9e-10	1	732	82705.3	HUMAN	X-ray repair cross-complementing protein 5
[48]		P13010	XRCC5_HUMAN	7	10.9	5.26	2.9e-10	690.849	2	141453	1.6	KDEK	TDTLEDLFPTTK			Q20170801-09	179.509	470	3.5e-08	1	732	82705.3	HUMAN	X-ray repair cross-complementing protein 5
[48]		P13010	XRCC5_HUMAN	7	10.9	5.26	2.9e-10	644.321	3	48612	1.2	TVHR	HLMLPDFDLLEDIESK		Oxidation@3	Q20170801-09	203.624	82	1.2e-07	1	732	82705.3	HUMAN	X-ray repair cross-complementing protein 5
[48]		P13010	XRCC5_HUMAN	7	10.9	5.26	2.9e-10	831.386	3	95973	-0.21	ALVL	FGTDGTDNPLSGGDQYQNITVHR			Q20170801-09	159.001	59	2.8e-06	1	732	82705.3	HUMAN	X-ray repair cross-complementing protein 5
[48]		P13010	XRCC5_HUMAN	7	10.9	5.26	2.9e-10	516.311	2	1360000	0.69	SKIK	TLFPLIEAK			Q20170801-07	179.944	535	1.4e-05	1	732	82705.3	HUMAN	X-ray repair cross-complementing protein 5
[48]		P13010	XRCC5_HUMAN	7	10.9	5.26	2.9e-10	386.731	2	142253	-1.1	VTTK	SQIPLSK			Q20170801-07	58.098	526	0.00014	1	732	82705.3	HUMAN	X-ray repair cross-complementing protein 5
[48]		P13010	XRCC5_HUMAN	7	10.9	5.26	2.9e-10	460.248	2	977826	0.41	RVKK	TWTVVDAK			Q20170801-09	101.862	275	0.0025	1	732	82705.3	HUMAN	X-ray repair cross-complementing protein 5
[49]		P06733	ENOA_HUMAN	7	19.6	4	3e-07	703.862	2	149726	-0.19	FDSR	GNPTVEVDLFTSK			Q20170801-09	165.537	16	3e-07	1	434	47169.4	HUMAN	Alpha-enolase
[49]		P06733	ENOA_HUMAN	7	19.6	4	3e-07	459.232	4	162481	0.23	LVVG	LCTGQIKTGAPCRSER	Carbamidomethyl@2;Carbamidomethyl@12		Q20170801-09	62.9702	388	7.9e-07	3	434	47169.4	HUMAN	Alpha-enolase
[49]		P06733	ENOA_HUMAN	7	19.6	4	3e-07	512.28	3	120187	1.8	QLLR	IEEELGSKAKFAGR			Q20170801-09	84.5799	413	8.4e-07	1	434	47169.4	HUMAN	Alpha-enolase
[49]		P06733	ENOA_HUMAN	7	19.6	4	3e-07	450.282	2	10600000	0.38	HINK	TIAPALVSK			Q20170801-09	95.4336	72	1.6e-05	1	434	47169.4	HUMAN	Alpha-enolase
[49]		P06733	ENOA_HUMAN	7	19.6	4	3e-07	457.47	4	155759	0.54	EFFR	SGKYDLDFKSPDDPSR			Q20170801-07	115.602	254	0.00029	1	434	47169.4	HUMAN	Alpha-enolase
[49]		P06733	ENOA_HUMAN	7	19.6	4	3e-07	504.254	2	903290	-1.2	VNEK	SCNCLLLK	Carbamidomethyl@2;Carbamidomethyl@4		Q20170801-09	98.5223	336	0.0003	1	434	47169.4	HUMAN	Alpha-enolase
[49]		P06733	ENOA_HUMAN	7	19.6	4	3e-07	373.561	3	568775	-0.36	RSER	LAKYNQLLR			Q20170801-09	101.083	404	0.00063	1	434	47169.4	HUMAN	Alpha-enolase
[50]		Q14974	IMB1_HUMAN	7	7.8	3.92	1.2e-06	613.337	2	76128	0.82	ELSR	VLANPGNSQVAR			Q20170801-09	63.5902	43	1.2e-06	1	876	97171.1	HUMAN	Importin subunit beta-1
[50]		Q14974	IMB1_HUMAN	7	7.8	3.92	1.2e-06	778.917	2	404383	-0.34	ILEK	TVSPDRLELEAAQK			Q20170801-09	111.983	10	6e-06	1	876	97171.1	HUMAN	Importin subunit beta-1
[50]		Q14974	IMB1_HUMAN	7	7.8	3.92	1.2e-06	701.379	3	131661	-1.3	ILEK	TVSPDRLELEAAQKFLER			Q20170801-07	183.936	10	7e-06	1	876	97171.1	HUMAN	Importin subunit beta-1
[50]		Q14974	IMB1_HUMAN	7	7.8	3.92	1.2e-06	430.578	3	650710	-1.8	NKAK	TLATWATKELR			Q20170801-09	146.61	860	1.3e-05	1	876	97171.1	HUMAN	Importin subunit beta-1
[50]		Q14974	IMB1_HUMAN	7	7.8	3.92	1.2e-06	446.251	2	6060000	0.56	NKAK	TLATWATK			Q20170801-09	94.8706	860	9.4e-05	1	876	97171.1	HUMAN	Importin subunit beta-1
[50]		Q14974	IMB1_HUMAN	7	7.8	3.92	1.2e-06	664.676	3	51354	-1.1	LQIK	NSLTSKDPDIKAQYQQR			Q20170801-09	84.9891	63	0.0003	1	876	97171.1	HUMAN	Importin subunit beta-1
[50]		Q14974	IMB1_HUMAN	7	7.8	3.92	1.2e-06	395.888	3	203651	0.56	YQQR	WLAIDANARR			Q20170801-09	112.028	80	0.014	1	876	97171.1	HUMAN	Importin subunit beta-1
[51]		Q9Y230	RUVB2_HUMAN	5	13.8	6.71	4.8e-12	751.359	2	836883	0.45	LTLK	TTEMETIYDLGTK			Q20170801-09	164.278	165	4.8e-12	1	463	51157	HUMAN	RuvB-like 2
[51]		Q9Y230	RUVB2_HUMAN	5	13.8	6.71	4.8e-12	658.839	2	45268	-2.3	LEPR	QASQGMVGQLAAR			Q20170801-09	101.249	41	4e-07	1	463	51157	HUMAN	RuvB-like 2
[51]		Q9Y230	RUVB2_HUMAN	5	13.8	6.71	4.8e-12	842.433	2	97315	-0.062	INSR	TQGFLALFSGDTGEIK			Q20170801-09	198.926	254	1.7e-06	1	463	51157	HUMAN	RuvB-like 2
[51]		Q9Y230	RUVB2_HUMAN	5	13.8	6.71	4.8e-12	398.219	3	448578	-0.57	EMSK	TEALTQAFRR			Q20170801-09	95.2355	116	7.1e-05	1	463	51157	HUMAN	RuvB-like 2
[51]		Q9Y230	RUVB2_HUMAN	5	13.8	6.71	4.8e-12	556.327	2	55599	-0.14	IAGR	AVLIAGQPGTGK			Q20170801-09	87.1498	72	0.00017	1	463	51157	HUMAN	RuvB-like 2
[52]		P10606	COX5B_HUMAN	3	19.4	7.6	1.8e-13	929.941	2	453425	-1.2	MRSM	ASGGGVPTDEEQATGLER		Abu@N-term	Q20170801-07	110.864	32	1.8e-13	1	129	13695.8	HUMAN	Cytochrome c oxidase subunit 5B, mitochondrial
[52]		P10606	COX5B_HUMAN	3	19.4	7.6	1.8e-13	872.435	3	451819	-2.5	MRSM	ASGGGVPTDEEQATGLEREIMLAAK		Abu@N-term	Q20170801-07	185.685	32	9.6e-11	1	129	13695.8	HUMAN	Cytochrome c oxidase subunit 5B, mitochondrial
[52]		P10606	COX5B_HUMAN	3	19.4	7.6	1.8e-13	887.417	2	180018	0.99	MRSM	ASGGGVPTDEEQATGLER			Q20170801-09	106.468	32	1.3e-10	1	129	13695.8	HUMAN	Cytochrome c oxidase subunit 5B, mitochondrial
[53]		P09960	LKHA4_HUMAN	4	9.3	8.49	4.2e-15	931.444	2	159891	1.8	-	MPEIVDTCSLASPASVCR	Carbamidomethyl@8;Carbamidomethyl@17	Met-loss@1	Q20170801-09	154.251	1	4.2e-15	1	611	69285.9	HUMAN	Leukotriene A-4 hydrolase
[53]		P09960	LKHA4_HUMAN	4	9.3	8.49	4.2e-15	640	3	206003	-1.4	FTRR	TLTGTAALTVQSQEDNLR			Q20170801-09	154.872	34	1.4e-07	1	611	69285.9	HUMAN	Leukotriene A-4 hydrolase
[53]		P09960	LKHA4_HUMAN	4	9.3	8.49	4.2e-15	492.596	3	748702	0.29	IGPR	TLVWSEKEQVEK			Q20170801-09	104.555	219	3.3e-06	1	611	69285.9	HUMAN	Leukotriene A-4 hydrolase
[53]		P09960	LKHA4_HUMAN	4	9.3	8.49	4.2e-15	389.896	3	276846	1.4	EQGR	MKFTRPLFK			Q20170801-09	116.938	565	0.00042	1	611	69285.9	HUMAN	Leukotriene A-4 hydrolase
[54]		P09884	DPOLA_HUMAN	3	2.1	7.85	6.2e-14	704.036	3	650738	0.6	KKKR	SIGASPNPFSVHTATAVPSGK		Abu@N-term	Q20170801-09	151.899	186	6.2e-14	1	1462	165914	HUMAN	DNA polymerase alpha catalytic subunit
[54]		P09884	DPOLA_HUMAN	3	2.1	7.85	6.2e-14	567.76	2	157418	2	QFSR	TGPLCPACMK	Carbamidomethyl@5;Carbamidomethyl@8		Q20170801-09	90.5314	1367	3.4e-12	1	1462	165914	HUMAN	DNA polymerase alpha catalytic subunit
[54]		P09884	DPOLA_HUMAN	3	2.1	7.85	6.2e-14	675.685	3	181353	0.0079	KKKR	SIGASPNPFSVHTATAVPSGK			Q20170801-09	145.57	186	5.5e-07	1	1462	165914	HUMAN	DNA polymerase alpha catalytic subunit
[55]		P62987	RL40_HUMAN	6	31.2	6.24	5.9e-11	894.467	2	628578	0.069	LTGK	TITLEVEPSDTIENVK			Q20170801-09	169.781	12	5.9e-11	4	128	14728.5	HUMAN	Ubiquitin-60S ribosomal protein L40
[55]		P62987	RL40_HUMAN	6	31.2	6.24	5.9e-11	541.28	2	217244	0.49	EDGR	TLSDYNIQK			Q20170801-07	87.2183	55	2.4e-05	4	128	14728.5	HUMAN	Ubiquitin-60S ribosomal protein L40
[55]		P62987	RL40_HUMAN	6	31.2	6.24	5.9e-11	994.033	2	112678	-0.83	LTGK	TITLEVEPSDTIENVKAK			Q20170801-09	156.996	12	0.00012	4	128	14728.5	HUMAN	Ubiquitin-60S ribosomal protein L40
[55]		P62987	RL40_HUMAN	6	31.2	6.24	5.9e-11	383.22	2	1100000	1.1	-	MQIFVK			Q20170801-09	110.381	1	0.0012	4	128	14728.5	HUMAN	Ubiquitin-60S ribosomal protein L40
[55]		P62987	RL40_HUMAN	6	31.2	6.24	5.9e-11	456.779	2	261970	0.3	LRGG	IIEPSLR		Abu@N-term	Q20170801-09	116.837	77	0.0019	1	128	14728.5	HUMAN	Ubiquitin-60S ribosomal protein L40
[55]		P62987	RL40_HUMAN	6	31.2	6.24	5.9e-11	414.254	2	254392	2	LRGG	IIEPSLR			Q20170801-07	101.955	77	0.0052	2	128	14728.5	HUMAN	Ubiquitin-60S ribosomal protein L40
[56]		P62826	RAN_HUMAN	7	21.3	5.25	1.7e-10	892.958	2	111924	-1.9	ISAK	SNYNFEKPFLWLAR			Q20170801-09	192.606	153	1.7e-10	1	216	24423.3	HUMAN	GTP-binding nuclear protein Ran
[56]		P62826	RAN_HUMAN	7	21.3	5.25	1.7e-10	508.294	2	385390	1.7	VQFK	LVLVGDGGTGK			Q20170801-09	96.5592	13	8.4e-08	1	216	24423.3	HUMAN	GTP-binding nuclear protein Ran
[56]		P62826	RAN_HUMAN	7	21.3	5.25	1.7e-10	480.743	2	54439	0.23	FVKR	HLTGEFEK			Q20170801-09	48.891	30	3.5e-07	1	216	24423.3	HUMAN	GTP-binding nuclear protein Ran
[56]		P62826	RAN_HUMAN	7	21.3	5.25	1.7e-10	583.341	3	121395	0.26	VQFK	LVLVGDGGTGKTTFVKR			Q20170801-09	121.827	13	0.00035	1	216	24423.3	HUMAN	GTP-binding nuclear protein Ran
[56]		P62826	RAN_HUMAN	7	21.3	5.25	1.7e-10	376.225	2	223888	-4.3	GTGK	TTFVKR			Q20170801-09	19.4017	24	0.0012	1	216	24423.3	HUMAN	GTP-binding nuclear protein Ran
[56]		P62826	RAN_HUMAN	7	21.3	5.25	1.7e-10	379.719	2	510482	0.0093	VKAK	SIVFHR			Q20170801-09	55.4309	135	0.0018	1	216	24423.3	HUMAN	GTP-binding nuclear protein Ran
[56]		P62826	RAN_HUMAN	7	21.3	5.25	1.7e-10	363.528	3	149973	-3.7	FVKR	HLTGEFEKK			Q20170801-09	34.872	30	0.0024	1	216	24423.3	HUMAN	GTP-binding nuclear protein Ran
[57]		O00193	SMAP_HUMAN	2	13.1	9.71	2.2e-17	1260.54	2	208685	-3	GVKR	SASPDDDLGSSNWEAADLGNEER		Abu@N-term	Q20170801-09	165.243	15	2.2e-17	1	183	20332.7	HUMAN	Small acidic protein
[57]		O00193	SMAP_HUMAN	2	13.1	9.71	2.2e-17	883.393	3	150302	-2	GVKR	SASPDDDLGSSNWEAADLGNEERK		Abu@N-term	Q20170801-09	152.011	15	4.5e-16	1	183	20332.7	HUMAN	Small acidic protein
[58]		Q5T4S7	UBR4_HUMAN	3	1.2	6.89	3.7e-12	710.823	4	70005	0.57	STLR	TSPADHGGSVGSESGGSAVDSVAGEHSVSGR			Q20170801-09	98.3873	2884	3.7e-12	1	5183	573846	HUMAN	E3 ubiquitin-protein ligase UBR4
[58]		Q5T4S7	UBR4_HUMAN	3	1.2	6.89	3.7e-12	743.371	2	140408	1	KSSR	TSVQPTFTASQYR			Q20170801-09	118.68	3845	5.6e-10	1	5183	573846	HUMAN	E3 ubiquitin-protein ligase UBR4
[58]		Q5T4S7	UBR4_HUMAN	3	1.2	6.89	3.7e-12	715.657	3	39505	-1	LVKR	TPSSGMSSTMKESAFQSEPR			Q20170801-09	111.701	1731	8.4e-10	1	5183	573846	HUMAN	E3 ubiquitin-protein ligase UBR4
[59]		P05141	ADT2_HUMAN	6	16.8	3.97	1.1e-07	379.564	3	639843	-0.18	ERVK	LLLQVQHASK			Q20170801-09	86.3014	34	1.1e-07	3	298	32852.5	HUMAN	ADP/ATP translocase 2
[59]		P05141	ADT2_HUMAN	6	16.8	3.97	1.1e-07	610.339	2	1190000	1.6	SFAK	DFLAGGVAAAISK			Q20170801-09	176.113	11	3.5e-07	1	298	32852.5	HUMAN	ADP/ATP translocase 2
[59]		P05141	ADT2_HUMAN	6	16.8	3.97	1.1e-07	398.215	4	176341	-0.084	ARTR	LAADVGKAGAEREFR			Q20170801-09	89.0396	141	3.6e-06	1	298	32852.5	HUMAN	ADP/ATP translocase 2
[59]		P05141	ADT2_HUMAN	6	16.8	3.97	1.1e-07	428.748	2	625843	0.39	AISK	TAVAPIER			Q20170801-09	56.0144	24	5.8e-06	4	298	32852.5	HUMAN	ADP/ATP translocase 2
[59]		P05141	ADT2_HUMAN	6	16.8	3.97	1.1e-07	361.889	3	356321	-0.19	AISK	TAVAPIERVK			Q20170801-09	66.4992	24	2.9e-05	4	298	32852.5	HUMAN	ADP/ATP translocase 2
[59]		P05141	ADT2_HUMAN	6	16.8	3.97	1.1e-07	465.772	2	191417	-0.69	DFAR	TRLAADVGK			Q20170801-09	35.877	139	0.0022	3	298	32852.5	HUMAN	ADP/ATP translocase 2
[59-1]	1	P12236	ADT3_HUMAN	5	11.4	3.14	1.1e-07	379.564	3	639843	-0.18	ERVK	LLLQVQHASK			Q20170801-09	86.3014	34	1.1e-07	3	298	32866.6	HUMAN	ADP/ATP translocase 3
[59-1]	1	P12236	ADT3_HUMAN	5	11.4	3.14	1.1e-07	487.598	3	64619	-1.9	DFAR	TRLAADVGKSGTER			Q20170801-09	44.3333	139	3e-06	1	298	32866.6	HUMAN	ADP/ATP translocase 3
[59-1]	1	P12236	ADT3_HUMAN	5	11.4	3.14	1.1e-07	428.748	2	625843	0.39	AISK	TAVAPIER			Q20170801-09	56.0144	24	5.8e-06	4	298	32866.6	HUMAN	ADP/ATP translocase 3
[59-1]	1	P12236	ADT3_HUMAN	5	11.4	3.14	1.1e-07	361.889	3	356321	-0.19	AISK	TAVAPIERVK			Q20170801-09	66.4992	24	2.9e-05	4	298	32866.6	HUMAN	ADP/ATP translocase 3
[59-1]	1	P12236	ADT3_HUMAN	5	11.4	3.14	1.1e-07	465.772	2	191417	-0.69	DFAR	TRLAADVGK			Q20170801-09	35.877	139	0.0022	3	298	32866.6	HUMAN	ADP/ATP translocase 3
[60]		P51148	RAB5C_HUMAN	4	24.5	5.28	2.8e-10	650.321	2	94045	4.6	GRNR	GVDLQENNPASR			Q20170801-07	78.5877	199	2.8e-10	1	216	23482.8	HUMAN	Ras-related protein Rab-5C
[60]		P51148	RAB5C_HUMAN	4	24.5	5.28	2.8e-10	776.896	2	99797	-0.85	TSAK	TAMNVNEIFMAIAK			Q20170801-07	201.727	167	6.5e-09	1	216	23482.8	HUMAN	Ras-related protein Rab-5C
[60]		P51148	RAB5C_HUMAN	4	24.5	5.28	2.8e-10	559.973	3	58211	0.76	AIAK	KLPKNEPQNATGAPGR			Q20170801-07	46.9018	181	1.1e-08	1	216	23482.8	HUMAN	Ras-related protein Rab-5C
[60]		P51148	RAB5C_HUMAN	4	24.5	5.28	2.8e-10	543.333	2	868787	1.9	CQFK	LVLLGESAVGK			Q20170801-09	147.727	24	1.7e-06	3	216	23482.8	HUMAN	Ras-related protein Rab-5C
[60-1]	2	P61020	RAB5B_HUMAN	3	15.3	5.82	1.4e-10	760.908	2	69483	-3.2	TSAK	TAMNVNDLFLAIAK			Q20170801-09	201.65	166	1.4e-10	1	215	23707	HUMAN	Ras-related protein Rab-5B
[60-1]	2	P61020	RAB5B_HUMAN	3	15.3	5.82	1.4e-10	543.333	2	868787	1.9	CQFK	LVLLGESAVGK			Q20170801-09	147.727	23	1.7e-06	3	215	23707	HUMAN	Ras-related protein Rab-5B
[60-1]	2	P61020	RAB5B_HUMAN	3	15.3	5.82	1.4e-10	353.87	3	866199	-0.35	ARAK	TWVKELQR			Q20170801-09	94.0479	113	0.001	1	215	23707	HUMAN	Ras-related protein Rab-5B
[60-2]	1	P20339	RAB5A_HUMAN	2	11.6	4.27	2.5e-09	784.894	2	144764	0.26	TSAK	TSMNVNEIFMAIAK			Q20170801-09	200.38	166	2.5e-09	1	215	23658.9	HUMAN	Ras-related protein Rab-5A
[60-2]	1	P20339	RAB5A_HUMAN	2	11.6	4.27	2.5e-09	543.333	2	868787	1.9	CQFK	LVLLGESAVGK			Q20170801-09	147.727	23	1.7e-06	3	215	23658.9	HUMAN	Ras-related protein Rab-5A
[61]		Q9Y2X3	NOP58_HUMAN	3	7.2	11.61	6.8e-21	814.858	2	368982	-1.3	SEVK	TYDPSGDSTLPTCSK	Carbamidomethyl@13		Q20170801-09	98.0086	427	6.8e-21	1	529	59578.7	HUMAN	Nucleolar protein 58
[61]		Q9Y2X3	NOP58_HUMAN	3	7.2	11.61	6.8e-21	664.335	2	64458	-0.84	SEYR	TQLYEYLQNR			Q20170801-07	149.709	269	4.2e-06	1	529	59578.7	HUMAN	Nucleolar protein 58
[61]		Q9Y2X3	NOP58_HUMAN	3	7.2	11.61	6.8e-21	699.856	2	263024	0.11	RGIR	SQMDGLIPGVEPR			Q20170801-09	162.474	121	0.00037	1	529	59578.7	HUMAN	Nucleolar protein 58
[62]		P50991	TCPD_HUMAN	6	9.3	5.76	2.7e-12	651.795	2	403640	0.75	EYSR	TLSGMESYCVR	Carbamidomethyl@9		Q20170801-09	119.81	442	2.7e-12	1	539	57924.8	HUMAN	T-complex protein 1 subunit delta
[62]		P50991	TCPD_HUMAN	6	9.3	5.76	2.7e-12	659.792	2	72388	0.55	EYSR	TLSGMESYCVR	Carbamidomethyl@9	Oxidation@5	Q20170801-09	84.1136	442	2.5e-10	1	539	57924.8	HUMAN	T-complex protein 1 subunit delta
[62]		P50991	TCPD_HUMAN	6	9.3	5.76	2.7e-12	573.32	2	425690	-1.4	QIKK	TGCNVLLIQK	Carbamidomethyl@3		Q20170801-09	118.969	293	1.6e-06	1	539	57924.8	HUMAN	T-complex protein 1 subunit delta
[62]		P50991	TCPD_HUMAN	6	9.3	5.76	2.7e-12	686.894	2	48307	0.34	ETVR	SILKIDDVVNTR			Q20170801-07	149.9	528	1.7e-05	1	539	57924.8	HUMAN	T-complex protein 1 subunit delta
[62]		P50991	TCPD_HUMAN	6	9.3	5.76	2.7e-12	575.811	2	43068	-0.56	TILK	QMQVLHPAAR			Q20170801-09	65.9428	80	8.3e-05	1	539	57924.8	HUMAN	T-complex protein 1 subunit delta
[62]		P50991	TCPD_HUMAN	6	9.3	5.76	2.7e-12	365.714	2	203863	-0.081	QGEK	TAGINVR			Q20170801-09	40.9068	490	0.00071	1	539	57924.8	HUMAN	T-complex protein 1 subunit delta
[63]		P20700	LMNB1_HUMAN	3	10.6	7.64	4.4e-14	1137.86	3	246389	-2.9	TVFK	TTIPEEEEEEEEAAGVVVEEELFHQQGTPR			Q20170801-09	200.301	548	4.4e-14	1	586	66408.9	HUMAN	Lamin-B1
[63]		P20700	LMNB1_HUMAN	3	10.6	7.64	4.4e-14	700.803	2	134840	-1.3	EFRK	SMYEEEINETR			Q20170801-09	104.67	210	4.8e-10	1	586	66408.9	HUMAN	Lamin-B1
[63]		P20700	LMNB1_HUMAN	3	10.6	7.64	4.4e-14	791.034	3	79052	0.94	ENAR	LSSEMNTSTVNSAREELMESR			Q20170801-09	158.367	277	7.9e-08	1	586	66408.9	HUMAN	Lamin-B1
[64]		P42167	LAP2B_HUMAN	4	11.7	4.84	2.3e-08	824.411	2	140620	-2.3	TESR	SSTPLPTISSSAENTR			Q20170801-09	121.456	158	2.3e-08	2	454	50670.6	HUMAN	Lamina-associated polypeptide 2, isoforms beta/gamma
[64]		P42167	LAP2B_HUMAN	4	11.7	4.84	2.3e-08	896.982	2	173592	-1.2	GNFK	HASPILPITEFSDIPR			Q20170801-09	186.335	304	3.2e-08	1	454	50670.6	HUMAN	Lamina-associated polypeptide 2, isoforms beta/gamma
[64]		P42167	LAP2B_HUMAN	4	11.7	4.84	2.3e-08	665.859	2	324054	-1.2	QLVK	YGVNPGPIVGTTR			Q20170801-09	126.845	127	4.4e-08	2	454	50670.6	HUMAN	Lamina-associated polypeptide 2, isoforms beta/gamma
[64]		P42167	LAP2B_HUMAN	4	11.7	4.84	2.3e-08	471.789	2	62609	-1.5	GRAK	TPVTLKQR			Q20170801-09	32.3115	208	0.00058	1	454	50670.6	HUMAN	Lamina-associated polypeptide 2, isoforms beta/gamma
[65]		P62491	RB11A_HUMAN	7	26.4	3.78	2.6e-08	540.788	2	784473	-0.16	LESK	STIGVEFATR			Q20170801-09	125.644	42	2.6e-08	2	216	24393.7	HUMAN	Ras-related protein Rab-11A
[65]		P62491	RB11A_HUMAN	7	26.4	3.78	2.6e-08	580.788	2	291400	0.0057	DIAK	HLTYENVER			Q20170801-07	66.8966	96	6.2e-08	2	216	24393.7	HUMAN	Ras-related protein Rab-11A
[65]		P62491	RB11A_HUMAN	7	26.4	3.78	2.6e-08	539.618	3	1050000	-0.38	VDGK	TIKAQIWDTAGQER			Q20170801-09	122.63	59	8.2e-08	2	216	24393.7	HUMAN	Ras-related protein Rab-11A
[65]		P62491	RB11A_HUMAN	7	26.4	3.78	2.6e-08	572.001	3	156441	1.1	YLFK	VVLIGDSGVGKSNLLSR			Q20170801-09	158.13	14	1.8e-07	2	216	24393.7	HUMAN	Ras-related protein Rab-11A
[65]		P62491	RB11A_HUMAN	7	26.4	3.78	2.6e-08	637.813	2	42365	5.8	KTIK	AQIWDTAGQER			Q20170801-07	108.868	62	4.5e-06	2	216	24393.7	HUMAN	Ras-related protein Rab-11A
[65]		P62491	RB11A_HUMAN	7	26.4	3.78	2.6e-08	373.705	2	410457	-2.1	FATR	SIQVDGK			Q20170801-09	26.2287	52	0.009	2	216	24393.7	HUMAN	Ras-related protein Rab-11A
[65]		P62491	RB11A_HUMAN	7	26.4	3.78	2.6e-08	544.82	2	74981	0.94	FATR	SIQVDGKTIK			Q20170801-09	76.1647	52	0.024	2	216	24393.7	HUMAN	Ras-related protein Rab-11A
[66]		A6NHR9	SMHD1_HUMAN	4	2.3	6.26	5.5e-11	755.878	2	201841	-0.84	SNLK	TTFQENTQSISVR			Q20170801-09	113.344	1208	5.5e-11	1	2005	226376	HUMAN	Structural maintenance of chromosomes flexible hinge domain-containing protein 1
[66]		A6NHR9	SMHD1_HUMAN	4	2.3	6.26	5.5e-11	722.359	2	96081	-0.35	PVPR	SLNSDISYFGVGGK			Q20170801-09	167.306	227	1.3e-07	1	2005	226376	HUMAN	Structural maintenance of chromosomes flexible hinge domain-containing protein 1
[66]		A6NHR9	SMHD1_HUMAN	4	2.3	6.26	5.5e-11	357.198	3	761522	0.72	VGHR	TVYLFDRR			Q20170801-09	109.347	27	8.4e-06	1	2005	226376	HUMAN	Structural maintenance of chromosomes flexible hinge domain-containing protein 1
[66]		A6NHR9	SMHD1_HUMAN	4	2.3	6.26	5.5e-11	657.345	2	89017	-1.8	KKEK	NKEAIYSGYIR			Q20170801-09	106.713	278	0.0006	1	2005	226376	HUMAN	Structural maintenance of chromosomes flexible hinge domain-containing protein 1
[67]		P51991	ROA3_HUMAN	2	6.3	11.88	8.5e-22	955.897	2	110637	-1.6	FGGR	SSGSPYGGGYGSGGGSGGYGSR			Q20170801-09	85.5384	355	8.5e-22	1	378	39595.3	HUMAN	Heterogeneous nuclear ribonucleoprotein A3
[67]		P51991	ROA3_HUMAN	2	6.3	11.88	8.5e-22	738.657	3	43777	-1.1	FGGR	SSGSPYGGGYGSGGGSGGYGSRRF			Q20170801-09	109.981	355	3.1e-08	1	378	39595.3	HUMAN	Heterogeneous nuclear ribonucleoprotein A3
[68]		Q86VP6	CAND1_HUMAN	5	4.6	5.21	2.5e-10	597.286	2	357177	-0.5	VSTR	HEMLPEFYK			Q20170801-07	136.707	365	2.5e-10	1	1230	136377	HUMAN	Cullin-associated NEDD8-dissociated protein 1
[68]		Q86VP6	CAND1_HUMAN	5	4.6	5.21	2.5e-10	648.341	2	205416	-2.4	STTR	TYIQCIAAISR	Carbamidomethyl@5		Q20170801-07	160.098	233	3.8e-08	1	1230	136377	HUMAN	Cullin-associated NEDD8-dissociated protein 1
[68]		Q86VP6	CAND1_HUMAN	5	4.6	5.21	2.5e-10	681.356	3	162635	-3.3	IGLK	TVIGELPPASSGSALAANVCK	Carbamidomethyl@20		Q20170801-09	169.161	112	6.5e-08	1	1230	136377	HUMAN	Cullin-associated NEDD8-dissociated protein 1
[68]		Q86VP6	CAND1_HUMAN	5	4.6	5.21	2.5e-10	566.634	3	99418	0.93	VYSQ	STALTHKQSYYSIAK			Q20170801-09	84.2727	787	8.5e-05	1	1230	136377	HUMAN	Cullin-associated NEDD8-dissociated protein 1
[68]		Q86VP6	CAND1_HUMAN	5	4.6	5.21	2.5e-10	724.056	3	358644	-0.63	IGLK	TVIGELPPASSGSALAANVCKK	Carbamidomethyl@20		Q20170801-09	156.443	112	0.0035	1	1230	136377	HUMAN	Cullin-associated NEDD8-dissociated protein 1
[69]		P11388	TOP2A_HUMAN	4	3	4.91	3.1e-10	614.821	2	443819	-0.61	KGKK	TQMAEVLPSPR			Q20170801-09	123.739	1205	3.1e-10	1	1531	174387	HUMAN	DNA topoisomerase 2-alpha
[69]		P11388	TOP2A_HUMAN	4	3	4.91	3.1e-10	622.285	2	145289	0.11	LQPK	SFGSTCQLSEK	Carbamidomethyl@6		Q20170801-09	78.9109	387	3.8e-10	1	1531	174387	HUMAN	DNA topoisomerase 2-alpha
[69]		P11388	TOP2A_HUMAN	4	3	4.91	3.1e-10	564.841	2	1140000	1.3	DSAK	TLAVSGLGVVGR			Q20170801-09	152.153	467	6.1e-08	1	1531	174387	HUMAN	DNA topoisomerase 2-alpha
[69]		P11388	TOP2A_HUMAN	4	3	4.91	3.1e-10	694.368	2	54722	5.6	KGGR	HVDYVADQIVTK			Q20170801-09	109.662	325	2.3e-06	1	1531	174387	HUMAN	DNA topoisomerase 2-alpha
[70]		P46777	RL5_HUMAN	3	11.1	8.63	2.6e-16	717.834	2	285203	-0.79	VHRK	HIMGQNVADYMR			Q20170801-09	130.124	198	2.6e-16	1	297	34362.9	HUMAN	60S ribosomal protein L5
[70]		P46777	RL5_HUMAN	3	11.1	8.63	2.6e-16	412.903	3	923608	-0.08	GLAR	TTTGNKVFGALK			Q20170801-09	93.8019	153	1.6e-08	1	297	34362.9	HUMAN	60S ribosomal protein L5
[70]		P46777	RL5_HUMAN	3	11.1	8.63	2.6e-16	368.569	3	141472	-0.39	-M	GFVKVVKNK		Abu@N-term	Q20170801-07	55.9475	2	2.6e-07	1	297	34362.9	HUMAN	60S ribosomal protein L5
[71]		Q9NSE4	SYIM_HUMAN	3	4.2	8.07	2.5e-14	643.65	3	870056	0.36	PSSR	TALAEAELEYNPEHVSR			Q20170801-09	146.645	251	2.5e-14	1	1012	113792	HUMAN	Isoleucine--tRNA ligase, mitochondrial
[71]		Q9NSE4	SYIM_HUMAN	3	4.2	8.07	2.5e-14	548.243	2	194146	-2	KQLR	TFYQMYDK			Q20170801-09	117.137	226	3.4e-07	1	1012	113792	HUMAN	Isoleucine--tRNA ligase, mitochondrial
[71]		Q9NSE4	SYIM_HUMAN	3	4.2	8.07	2.5e-14	673.683	3	59466	-3	FHHK	TKDEYLINSQTTEHIVK			Q20170801-09	121.472	539	1.7e-06	1	1012	113792	HUMAN	Isoleucine--tRNA ligase, mitochondrial
[72]		P29401	TKT_HUMAN	3	7.9	7.78	8.6e-14	836.741	3	1640000	-0.65	CFIR	TSRPENAIIYNNNEDFQVGQAK			Q20170801-09	142.794	472	8.6e-14	1	623	67878.2	HUMAN	Transketolase
[72]		P29401	TKT_HUMAN	3	7.9	7.78	8.6e-14	942.962	2	282534	-2.6	AMFR	SVPTSTVFYPSDGVATEK			Q20170801-09	154.803	439	1.3e-11	1	623	67878.2	HUMAN	Transketolase
[72]		P29401	TKT_HUMAN	3	7.9	7.78	8.6e-14	471.785	2	112187	0.16	RVPR	SGKPAELLK			Q20170801-09	47.2557	595	0.014	1	623	67878.2	HUMAN	Transketolase
[73]		Q04637	IF4G1_HUMAN	4	2.1	5.09	4e-09	510.285	2	1070000	-0.65	DKRR	GGPPGPPISR		Abu@N-term	Q20170801-07	79.7103	1033	4e-09	1	1599	175492	HUMAN	Eukaryotic translation initiation factor 4 gamma 1
[73]		Q04637	IF4G1_HUMAN	4	2.1	5.09	4e-09	598.301	2	263685	0.23	ATKR	SFSKEVEER		Abu@N-term	Q20170801-09	64.7736	1185	1.8e-08	1	1599	175492	HUMAN	Eukaryotic translation initiation factor 4 gamma 1
[73]		Q04637	IF4G1_HUMAN	4	2.1	5.09	4e-09	555.775	2	70190	-0.59	ATKR	SFSKEVEER			Q20170801-09	45.5871	1185	4.5e-07	1	1599	175492	HUMAN	Eukaryotic translation initiation factor 4 gamma 1
[73]		Q04637	IF4G1_HUMAN	4	2.1	5.09	4e-09	590.975	3	117421	-0.02	NRFS	ALQQAVPTESTDNRR		Abu@N-term	Q20170801-09	85.2465	1125	7.2e-06	1	1599	175492	HUMAN	Eukaryotic translation initiation factor 4 gamma 1
[74]		P78371	TCPB_HUMAN	3	5.8	6.23	6.1e-11	565.781	2	183202	1.7	RILK	HGINCFINR	Carbamidomethyl@5		Q20170801-09	94.4755	285	6.1e-11	1	535	57488.7	HUMAN	T-complex protein 1 subunit beta
[74]		P78371	TCPB_HUMAN	3	5.8	6.23	6.1e-11	779.074	3	147978	-0.0039	LMAH	AVTQLANRTPGKEAVAMESYAK			Q20170801-09	131.236	420	2.7e-10	1	535	57488.7	HUMAN	T-complex protein 1 subunit beta
[74]		P78371	TCPB_HUMAN	3	5.8	6.23	6.1e-11	494.582	3	474103	0.87	LANR	TPGKEAVAMESYAK			Q20170801-09	94.3161	428	7.3e-06	1	535	57488.7	HUMAN	T-complex protein 1 subunit beta
[75]		O43707	ACTN4_HUMAN	4	5.2	6.63	2e-12	696.827	2	210505	-0.61	QQRK	TFTAWCNSHLR	Carbamidomethyl@6		Q20170801-09	121.705	55	2e-12	4	911	104855	HUMAN	Alpha-actinin-4
[75]		O43707	ACTN4_HUMAN	4	5.2	6.63	2e-12	645.299	2	380485	0.44	LDYK	SFSTALYGESDL			Q20170801-09	182.011	900	3.4e-06	2	911	104855	HUMAN	Alpha-actinin-4
[75]		O43707	ACTN4_HUMAN	4	5.2	6.63	2e-12	715.385	2	217048	-1	TIAR	TINEVENQILTR			Q20170801-09	150.379	746	8.3e-06	2	911	104855	HUMAN	Alpha-actinin-4
[75]		O43707	ACTN4_HUMAN	4	5.2	6.63	2e-12	494.609	3	232321	0.26	WIRR	TIPWLEDRVPQK			Q20170801-09	156.413	312	5.3e-05	1	911	104855	HUMAN	Alpha-actinin-4
[76]		P07814	SYEP_HUMAN	5	3.7	4.2	9e-09	615.631	3	288943	-1.1	WIKK	TTARDQDLEPGAPSMGAK			Q20170801-09	90.3368	1460	9e-09	1	1512	170592	HUMAN	Bifunctional glutamate/proline--tRNA ligase
[76]		P07814	SYEP_HUMAN	5	3.7	4.2	9e-09	849.936	2	77788	2.8	EKEK	THVADFAPEVAWVTR			Q20170801-09	178.881	1092	1.6e-07	1	1512	170592	HUMAN	Bifunctional glutamate/proline--tRNA ligase
[76]		P07814	SYEP_HUMAN	5	3.7	4.2	9e-09	561.796	2	145170	0.58	RDMK	SCQFVAVRR	Carbamidomethyl@2		Q20170801-09	65.5511	1376	7.2e-07	1	1512	170592	HUMAN	Bifunctional glutamate/proline--tRNA ligase
[76]		P07814	SYEP_HUMAN	5	3.7	4.2	9e-09	825.883	2	49005	-1.9	EDLK	THMVVANTMEDFQK			Q20170801-09	128.868	1422	3.8e-06	1	1512	170592	HUMAN	Bifunctional glutamate/proline--tRNA ligase
[76]		P07814	SYEP_HUMAN	5	3.7	4.2	9e-09	483.745	2	133559	0.81	RDMK	SCQFVAVR	Carbamidomethyl@2		Q20170801-09	83.8388	1376	0.00018	1	1512	170592	HUMAN	Bifunctional glutamate/proline--tRNA ligase
[77]		P06744	G6PI_HUMAN	6	12.9	5.78	7.4e-11	609.828	2	359843	0.62	AVAK	HFVALSTNTTK			Q20170801-09	77.5166	242	7.4e-11	1	558	63147.7	HUMAN	Glucose-6-phosphate isomerase
[77]		P06744	G6PI_HUMAN	6	12.9	5.78	7.4e-11	520.25	3	280904	1.9	ARER	MFNGEKINYTEGR			Q20170801-09	108.082	84	2e-09	1	558	63147.7	HUMAN	Glucose-6-phosphate isomerase
[77]		P06744	G6PI_HUMAN	6	12.9	5.78	7.4e-11	916.512	2	40276	-0.037	HIAK	TLAQLNPESSLFIIASK			Q20170801-07	198.998	195	0.00018	1	558	63147.7	HUMAN	Glucose-6-phosphate isomerase
[77]		P06744	G6PI_HUMAN	6	12.9	5.78	7.4e-11	658.337	2	189732	1.1	QFQK	LQQWYREHR			Q20170801-09	65.1285	13	0.00018	1	558	63147.7	HUMAN	Glucose-6-phosphate isomerase
[77]		P06744	G6PI_HUMAN	6	12.9	5.78	7.4e-11	366.845	3	179220	-0.14	QRVR	SGDWKGYTGK			Q20170801-07	54.5507	138	0.00061	1	558	63147.7	HUMAN	Glucose-6-phosphate isomerase
[77]		P06744	G6PI_HUMAN	6	12.9	5.78	7.4e-11	658.85	2	157970	-2.7	-	MAALTRDPQFQK		Met-loss+Acetyl@1	Q20170801-09	119.576	1	0.0046	1	558	63147.7	HUMAN	Glucose-6-phosphate isomerase
[78]		Q13263	TIF1B_HUMAN	4	4.8	5.25	4.6e-10	724.781	2	36066	-3.7	PLVL	FCESCDTLTCR	Carbamidomethyl@2;Carbamidomethyl@5;Carbamidomethyl@10		Q20170801-09	94.2428	220	4.6e-10	1	835	88550.5	HUMAN	Transcription intermediary factor 1-beta
[78]		Q13263	TIF1B_HUMAN	4	4.8	5.25	4.6e-10	561.266	2	677849	-0.39	KRSR	SGEGEVSGLMR			Q20170801-09	100.581	473	1.4e-08	1	835	88550.5	HUMAN	Transcription intermediary factor 1-beta
[78]		Q13263	TIF1B_HUMAN	4	4.8	5.25	4.6e-10	605.317	3	400120	-1.3	KRGR	VLVNDAQKVTEGQQER			Q20170801-09	89.5429	312	4.2e-07	1	835	88550.5	HUMAN	Transcription intermediary factor 1-beta
[78]		Q13263	TIF1B_HUMAN	4	4.8	5.25	4.6e-10	455.558	3	295143	1	GVKR	SRSGEGEVSGLMR			Q20170801-09	83.3346	471	0.00027	1	835	88550.5	HUMAN	Transcription intermediary factor 1-beta
[79]		O14654	IRS4_HUMAN	4	2.5	5.05	6.6e-10	579.812	2	244115	0.62	LKKR	SYFGKLTQSK			Q20170801-09	92.9211	614	6.6e-10	1	1257	133769	HUMAN	Insulin receptor substrate 4
[79]		O14654	IRS4_HUMAN	4	2.5	5.05	6.6e-10	794.385	2	66637	2	SSSK	SWSSYFSLPNPFR			Q20170801-09	204.626	804	9.5e-10	1	1257	133769	HUMAN	Insulin receptor substrate 4
[79]		O14654	IRS4_HUMAN	4	2.5	5.05	6.6e-10	492.748	2	139966	-0.28	PQSR	SQSFFAAAR			Q20170801-07	106.396	1089	4.1e-07	1	1257	133769	HUMAN	Insulin receptor substrate 4
[79]		O14654	IRS4_HUMAN	4	2.5	5.05	6.6e-10	622.337	2	69943	-1.3	LKKR	SYFGKLTQSK		Abu@N-term	Q20170801-09	101.856	614	5.7e-06	1	1257	133769	HUMAN	Insulin receptor substrate 4
[80]		P41252	SYIC_HUMAN	3	3.5	8.42	5.5e-15	640.653	3	276650	-0.58	QFQK	TGTIVVEGHELHDEDIR			Q20170801-09	123.432	930	5.5e-15	1	1262	144499	HUMAN	Isoleucine--tRNA ligase, cytoplasmic
[80]		P41252	SYIC_HUMAN	3	3.5	8.42	5.5e-15	706.869	2	761064	-0.53	LNMK	TVYVSVLPTTADF			Q20170801-09	200.238	1250	1.1e-06	1	1262	144499	HUMAN	Isoleucine--tRNA ligase, cytoplasmic
[80]		P41252	SYIC_HUMAN	3	3.5	8.42	5.5e-15	530.302	3	274438	1.5	IQEK	TQLKGSELEITLTR			Q20170801-09	145.006	1058	8.1e-05	1	1262	144499	HUMAN	Isoleucine--tRNA ligase, cytoplasmic
[81]		Q9H2W6	RM46_HUMAN	3	9.7	6.71	8.2e-12	735.378	2	628768	0.035	SRSL	ALAAAPSSNGSPWR		Abu@N-term	Q20170801-09	131.057	33	8.2e-12	1	279	31705.4	HUMAN	39S ribosomal protein L46, mitochondrial
[81]		Q9H2W6	RM46_HUMAN	3	9.7	6.71	8.2e-12	692.854	2	88104	2.3	SRSL	ALAAAPSSNGSPWR			Q20170801-07	120.542	33	8.1e-09	1	279	31705.4	HUMAN	39S ribosomal protein L46, mitochondrial
[81]		Q9H2W6	RM46_HUMAN	3	9.7	6.71	8.2e-12	711.35	2	24906	-1.1	TAER	TLATLSENNMEAK			Q20170801-07	112.573	191	8.3e-07	1	279	31705.4	HUMAN	39S ribosomal protein L46, mitochondrial
[82]		P30041	PRDX6_HUMAN	2	10.7	9.04	4e-16	1049.55	2	498385	1.6	-	MPGGLLLGDVAPNFEANTTVGR		Met-loss@1	Q20170801-09	192.336	1	4e-16	1	224	25035.2	HUMAN	Peroxiredoxin-6
[82]		P30041	PRDX6_HUMAN	2	10.7	9.04	4e-16	789.763	3	292719	-0.96	-	MPGGLLLGDVAPNFEANTTVGRIR		Met-loss@1	Q20170801-09	189.212	1	1.4e-09	1	224	25035.2	HUMAN	Peroxiredoxin-6
[83]		P22392	NDKB_HUMAN	3	25	6.21	6.8e-11	672.886	2	359209	1.4	NLER	TFIAIKPDGVQR			Q20170801-09	123.074	7	6.8e-11	2	152	17298.2	HUMAN	Nucleoside diphosphate kinase B
[83]		P22392	NDKB_HUMAN	3	25	6.21	6.8e-11	583.733	2	604863	1.3	VDYK	SCAHDWVYE	Carbamidomethyl@2		Q20170801-09	108.819	144	7.5e-10	2	152	17298.2	HUMAN	Nucleoside diphosphate kinase B
[83]		P22392	NDKB_HUMAN	3	25	6.21	6.8e-11	595.977	3	243331	0.11	KTGR	VMLGETNPADSKPGTIR			Q20170801-09	113.506	89	0.0004	3	152	17298.2	HUMAN	Nucleoside diphosphate kinase B
[84]		Q15393	SF3B3_HUMAN	6	4.6	3.46	1.5e-07	744.88	2	108403	-1.1	VLLR	TVLDPVTGDLSDTR			Q20170801-09	152.462	677	1.5e-07	1	1217	135578	HUMAN	Splicing factor 3B subunit 3
[84]		Q15393	SF3B3_HUMAN	6	4.6	3.46	1.5e-07	638.802	2	194129	1.1	MSSR	SWLSYSYQSR			Q20170801-09	150.101	719	3.6e-07	1	1217	135578	HUMAN	Splicing factor 3B subunit 3
[84]		Q15393	SF3B3_HUMAN	6	4.6	3.46	1.5e-07	596.307	2	158305	1.6	LNPR	SVAGGFVYTYK			Q20170801-09	137.971	919	2.2e-05	1	1217	135578	HUMAN	Splicing factor 3B subunit 3
[84]		Q15393	SF3B3_HUMAN	6	4.6	3.46	1.5e-07	452.235	2	691100	0.96	LSFR	SYYFPVK			Q20170801-09	128.478	1165	5.7e-05	1	1217	135578	HUMAN	Splicing factor 3B subunit 3
[84]		Q15393	SF3B3_HUMAN	6	4.6	3.46	1.5e-07	642.372	2	62448	0.41	GCRR	IVPGQFLAVDPK			Q20170801-09	168.106	115	0.00025	1	1217	135578	HUMAN	Splicing factor 3B subunit 3
[84]		Q15393	SF3B3_HUMAN	6	4.6	3.46	1.5e-07	582.639	3	212159	0.09	VLLR	TVLDPVTGDLSDTRTR			Q20170801-09	138.849	677	0.0011	1	1217	135578	HUMAN	Splicing factor 3B subunit 3
[85]		Q92841	DDX17_HUMAN	2	4.5	8.29	9.4e-15	757.995	3	84263	-1.1	SRYR	TTSSANNPNLMYQDECDRR	Carbamidomethyl@16		Q20170801-09	92.1254	569	9.4e-15	1	729	80273.1	HUMAN	Probable ATP-dependent RNA helicase DDX17
[85]		Q92841	DDX17_HUMAN	2	4.5	8.29	9.4e-15	728.343	2	83748	-1.9	STGR	SSQSSSQQFSGIGR			Q20170801-09	77.3924	671	1.3e-09	1	729	80273.1	HUMAN	Probable ATP-dependent RNA helicase DDX17
[86]		Q8NI60	COQ8A_HUMAN	3	3.9	6.64	1.1e-11	686.004	3	622016	-0.51	QRRF	FHQDQSPVGGLTAEDIEK		Abu@N-term	Q20170801-07	144.065	163	1.1e-11	1	647	71950.8	HUMAN	Atypical kinase COQ8A, mitochondrial
[86]		Q8NI60	COQ8A_HUMAN	3	3.9	6.64	1.1e-11	571.541	4	400533	2.2	QRRF	FHQDQSPVGGLTAEDIEKAR		Abu@N-term	Q20170801-09	142.471	163	1.5e-09	1	647	71950.8	HUMAN	Atypical kinase COQ8A, mitochondrial
[86]		Q8NI60	COQ8A_HUMAN	3	3.9	6.64	1.1e-11	362.182	2	427315	-4.9	SFSA	MGFQR		Abu@N-term	Q20170801-09	95.8058	156	0.031	2	647	71950.8	HUMAN	Atypical kinase COQ8A, mitochondrial
[87]		Q9UBE0	SAE1_HUMAN	2	6.1	7.93	4.5e-14	795.028	3	226619	-1.2	-	MVEKEEAGGGISEEEAAQYDR		Abu@N-term	Q20170801-09	120.946	1	4.5e-14	1	346	38450.2	HUMAN	SUMO-activating enzyme subunit 1
[87]		Q9UBE0	SAE1_HUMAN	2	6.1	7.93	4.5e-14	751.35	3	72616	1.6	-M	VEKEEAGGGISEEEAAQYDR		Abu@N-term	Q20170801-09	104.735	2	6.1e-10	1	346	38450.2	HUMAN	SUMO-activating enzyme subunit 1
[88]		P38432	COIL_HUMAN	2	3.1	9.46	6.5e-17	749.004	3	227642	0.41	AKKR	AFQLEEGEETEPDCKYSK	Carbamidomethyl@14	Abu@N-term	Q20170801-07	130.656	113	6.5e-17	1	576	62608.8	HUMAN	Coilin
[88]		P38432	COIL_HUMAN	2	3.1	9.46	6.5e-17	933.904	2	53095	-3.3	AKKR	AFQLEEGEETEPDCK	Carbamidomethyl@14	Abu@N-term	Q20170801-07	134.079	113	6.1e-07	1	576	62608.8	HUMAN	Coilin
[89]		O15173	PGRC2_HUMAN	4	17.9	4.93	1.5e-09	849.424	2	100915	-3	WGRR	GLGAGAGAGEESPATSLPR			Q20170801-09	126.423	79	1.5e-09	1	223	23818.6	HUMAN	Membrane-associated progesterone receptor component 2
[89]		O15173	PGRC2_HUMAN	4	17.9	4.93	1.5e-09	736.87	2	131542	0.69	KGSK	FYGPAGPYGIFAGR			Q20170801-09	184.218	136	2.3e-07	1	223	23818.6	HUMAN	Membrane-associated progesterone receptor component 2
[89]		O15173	PGRC2_HUMAN	4	17.9	4.93	1.5e-09	618.654	3	90939	-0.25	RWGR	RGLGAGAGAGEESPATSLPR			Q20170801-09	111.227	78	1.6e-06	1	223	23818.6	HUMAN	Membrane-associated progesterone receptor component 2
[89]		O15173	PGRC2_HUMAN	4	17.9	4.93	1.5e-09	354.7	2	136609	0.005	VNGK	VFDVTK			Q20170801-09	63.3424	127	0.0039	3	223	23818.6	HUMAN	Membrane-associated progesterone receptor component 2
[89-1]	1	O00264	PGRC1_HUMAN	2	10.3	4.23	9.9e-09	758.863	2	113129	-1.9	KGRK	FYGPEGPYGVFAGR			Q20170801-09	175.898	106	9.9e-09	1	195	21671.3	HUMAN	Membrane-associated progesterone receptor component 1
[89-1]	1	O00264	PGRC1_HUMAN	2	10.3	4.23	9.9e-09	354.7	2	136609	0.005	INGK	VFDVTK			Q20170801-09	63.3424	97	0.0039	3	195	21671.3	HUMAN	Membrane-associated progesterone receptor component 1
[90]		P02545	LMNA_HUMAN	3	7.1	5.51	1.2e-09	746.379	2	126246	2.5	NSLR	TALINSTGEEVAMR			Q20170801-09	134.306	528	1.2e-09	1	664	74140.1	HUMAN	Prelamin-A/C
[90]		P02545	LMNA_HUMAN	3	7.1	5.51	1.2e-09	826.404	2	78912	-1.9	RSYR	SVGGSGGGSFGDNLVTR		Abu@N-term	Q20170801-07	136.371	628	2.7e-08	1	664	74140.1	HUMAN	Prelamin-A/C
[90]		P02545	LMNA_HUMAN	3	7.1	5.51	1.2e-09	584.96	3	194122	1.9	SAER	NSNLVGAAHEELQQSR			Q20170801-09	111.3	281	4.5e-06	1	664	74140.1	HUMAN	Prelamin-A/C
[91]		P62805	H4_HUMAN	4	35	4.23	2.9e-09	494.623	3	702445	0.67	KVLR	DNIQGITKPAIRR			Q20170801-09	88.5593	25	2.9e-09	1	103	11367.4	HUMAN	Histone H4
[91]		P62805	H4_HUMAN	4	35	4.23	2.9e-09	489.607	3	1100000	1.6	AKRK	TVTAMDVVYALKR			Q20170801-09	175.756	81	3.2e-09	1	103	11367.4	HUMAN	Histone H4
[91]		P62805	H4_HUMAN	4	35	4.23	2.9e-09	663.38	2	62359	-0.64	KVLR	DNIQGITKPAIR			Q20170801-09	104.077	25	6.7e-08	1	103	11367.4	HUMAN	Histone H4
[91]		P62805	H4_HUMAN	4	35	4.23	2.9e-09	590.814	2	68326	-0.57	GVKR	ISGLIYEETR			Q20170801-07	129.65	47	9.4e-05	1	103	11367.4	HUMAN	Histone H4
[92]		Q07020	RL18_HUMAN	3	18.1	5	1.2e-08	673.369	2	1160000	-0.62	RENK	TAVVVGTITDDVR			Q20170801-09	144.645	79	1.2e-08	1	188	21634.7	HUMAN	60S ribosomal protein L18
[92]		Q07020	RL18_HUMAN	3	18.1	5	1.2e-08	558.796	2	293896	1.2	DSPK	GCGTVLLSGPR	Carbamidomethyl@2		Q20170801-09	106.728	133	1.8e-08	1	188	21634.7	HUMAN	60S ribosomal protein L18
[92]		Q07020	RL18_HUMAN	3	18.1	5	1.2e-08	570.828	2	307223	0.59	FMSR	TNRPPLSLSR			Q20170801-09	78.6354	56	1.1e-05	1	188	21634.7	HUMAN	60S ribosomal protein L18
[93]		P22314	UBA1_HUMAN	4	4.3	5.25	4e-09	955	2	227469	-0.94	ISFK	SLVASLAEPDFVVTDFAK			Q20170801-09	202.323	305	4e-09	1	1058	117850	HUMAN	Ubiquitin-like modifier-activating enzyme 1
[93]		P22314	UBA1_HUMAN	4	4.3	5.25	4e-09	644.831	2	274971	-1.3	LKER	LDQPMTEIVSR			Q20170801-09	135.738	1011	1.1e-05	1	1058	117850	HUMAN	Ubiquitin-like modifier-activating enzyme 1
[93]		P22314	UBA1_HUMAN	4	4.3	5.25	4e-09	466.268	2	1190000	-0.22	PPEK	SIPICTLK	Carbamidomethyl@5		Q20170801-09	113.98	628	6.4e-05	1	1058	117850	HUMAN	Ubiquitin-like modifier-activating enzyme 1
[93]		P22314	UBA1_HUMAN	4	4.3	5.25	4e-09	407.264	2	795243	0.56	EIAK	NIILGGVK			Q20170801-09	110.093	90	0.023	1	1058	117850	HUMAN	Ubiquitin-like modifier-activating enzyme 1
[94]		P53041	PPP5_HUMAN	3	8.8	7.16	6e-13	738.824	2	2880000	-1.3	AYLR	TECYGYALGDATR	Carbamidomethyl@3		Q20170801-09	122.921	75	6e-13	1	499	56879.2	HUMAN	Serine/threonine-protein phosphatase 5
[94]		P53041	PPP5_HUMAN	3	8.8	7.16	6e-13	647.809	2	53355	0.47	ISKR	GVSCQFGPDVTK	Carbamidomethyl@4		Q20170801-09	104.6	401	1.1e-05	1	499	56879.2	HUMAN	Serine/threonine-protein phosphatase 5
[94]		P53041	PPP5_HUMAN	3	8.8	7.16	6e-13	528.008	4	231160	3.3	EGER	TECAEPPRDEPPADGALKR	Carbamidomethyl@3		Q20170801-09	80.0866	9	6.5e-05	1	499	56879.2	HUMAN	Serine/threonine-protein phosphatase 5
[95]		P61978	HNRPK_HUMAN	2	6	10.66	3.9e-19	890.903	2	276185	0.2	KALR	TDYNASVSVPDSSGPER			Q20170801-09	115.565	70	3.9e-19	1	463	50976.7	HUMAN	Heterogeneous nuclear ribonucleoprotein K
[95]		P61978	HNRPK_HUMAN	2	6	10.66	3.9e-19	450.555	3	189541	1.3	AFKR	SRNTDEMVELR			Q20170801-09	85.2963	36	0.00058	1	463	50976.7	HUMAN	Heterogeneous nuclear ribonucleoprotein K
[96]		P31943	HNRH1_HUMAN	3	9.6	6.1	1.1e-10	921.448	2	108716	-1	FQGR	STGEAFVQFASQEIAEK			Q20170801-09	186.709	151	1.1e-10	2	449	49229.9	HUMAN	Heterogeneous nuclear ribonucleoprotein H
[96]		P31943	HNRH1_HUMAN	3	9.6	6.1	1.1e-10	704.861	2	509987	0.84	-M	MLGTEGGEGFVVK		Abu@N-term	Q20170801-07	155.276	2	6.1e-09	1	449	49229.9	HUMAN	Heterogeneous nuclear ribonucleoprotein H
[96]		P31943	HNRH1_HUMAN	3	9.6	6.1	1.1e-10	752.849	2	44563	4.4	VKVR	GLPWSCSADEVQR	Carbamidomethyl@6		Q20170801-07	143.808	17	0.0084	1	449	49229.9	HUMAN	Heterogeneous nuclear ribonucleoprotein H
[97]		Q99613	EIF3C_HUMAN	3	3.9	5.02	1.1e-08	624.806	2	368068	-0.099	GDWK	TCHSFIINEK	Carbamidomethyl@2		Q20170801-09	84.4684	751	1.1e-08	2	913	105345	HUMAN	Eukaryotic translation initiation factor 3 subunit C
[97]		Q99613	EIF3C_HUMAN	3	3.9	5.02	1.1e-08	877.967	2	68068	-0.65	VMHR	TEPTAQQNLALQLAEK			Q20170801-07	155.565	847	9e-08	2	913	105345	HUMAN	Eukaryotic translation initiation factor 3 subunit C
[97]		Q99613	EIF3C_HUMAN	3	3.9	5.02	1.1e-08	367.208	3	301567	0.016	GKAK	SIVDKEGVPR			Q20170801-09	67.1027	95	9.5e-07	2	913	105345	HUMAN	Eukaryotic translation initiation factor 3 subunit C
[98]		P08865	RSSA_HUMAN	3	12.9	6.97	1.2e-12	870.978	2	155160	-0.067	LAAR	AIVAIENPADVSVISSR			Q20170801-09	176.791	64	1.2e-12	1	295	32854.4	HUMAN	40S ribosomal protein SA
[98]		P08865	RSSA_HUMAN	3	12.9	6.97	1.2e-12	602.328	2	104907	0.4	AVLK	FAAATGATPIAGR			Q20170801-09	101.485	90	7.3e-08	1	295	32854.4	HUMAN	40S ribosomal protein SA
[98]		P08865	RSSA_HUMAN	3	12.9	6.97	1.2e-12	456.78	2	329190	0.75	REPR	LLVVTDPR			Q20170801-09	112.45	121	0.011	1	295	32854.4	HUMAN	40S ribosomal protein SA
[99]		P25705	ATPA_HUMAN	3	7.2	5.46	3.8e-10	812.948	2	2910000	-1.1	IVKR	TGAIVDVPVGEELLGR			Q20170801-09	188.467	134	3.8e-10	1	553	59751.1	HUMAN	ATP synthase subunit alpha, mitochondrial
[99]		P25705	ATPA_HUMAN	3	7.2	5.46	3.8e-10	491.62	3	134766	0.56	QTGK	TSIAIDTIINQKR			Q20170801-09	148.151	219	2.2e-07	1	553	59751.1	HUMAN	ATP synthase subunit alpha, mitochondrial
[99]		P25705	ATPA_HUMAN	3	7.2	5.46	3.8e-10	644.351	2	115121	-0.004	DNGK	HALIIYDDLSK			Q20170801-09	143.756	306	2.4e-06	1	553	59751.1	HUMAN	ATP synthase subunit alpha, mitochondrial
[100]		P49792	RBP2_HUMAN	3	0.9	5.32	2.2e-10	714.318	2	161139	-0.59	CFKK	TFEECQQNLMK	Carbamidomethyl@5		Q20170801-09	109.535	3036	2.2e-10	1	3224	358202	HUMAN	E3 SUMO-protein ligase RanBP2
[100]		P49792	RBP2_HUMAN	3	0.9	5.32	2.2e-10	672.811	2	147232	-1.7	CLQK	TGSGLNSFYDQR			Q20170801-09	118.983	585	1.2e-08	1	3224	358202	HUMAN	E3 SUMO-protein ligase RanBP2
[100]		P49792	RBP2_HUMAN	3	0.9	5.32	2.2e-10	654.984	3	116975	3	CLQK	TGSGLNSFYDQREYIGR			Q20170801-09	150.612	585	3.9e-06	1	3224	358202	HUMAN	E3 SUMO-protein ligase RanBP2
[101]		O75533	SF3B1_HUMAN	5	3.7	4.41	1.3e-09	606.304	2	454077	-0.35	KIAK	THEDIEAQIR			Q20170801-09	71.6452	7	1.3e-09	1	1304	145832	HUMAN	Splicing factor 3B subunit 1
[101]		O75533	SF3B1_HUMAN	5	3.7	4.41	1.3e-09	795.743	3	72238	1.5	KHRR	TMIISPERLDPFADGGKTPDPK			Q20170801-09	176.055	125	7.7e-06	1	1304	145832	HUMAN	Splicing factor 3B subunit 1
[101]		O75533	SF3B1_HUMAN	5	3.7	4.41	1.3e-09	458.207	2	1690000	-0.26	MNAR	TYMDVMR			Q20170801-09	105.696	151	1.2e-05	1	1304	145832	HUMAN	Splicing factor 3B subunit 1
[101]		O75533	SF3B1_HUMAN	5	3.7	4.41	1.3e-09	473.755	2	1170000	0.41	KHRR	TMIISPER			Q20170801-09	95.8099	125	2.6e-05	1	1304	145832	HUMAN	Splicing factor 3B subunit 1
[101]		O75533	SF3B1_HUMAN	5	3.7	4.41	1.3e-09	689.332	3	51765	1	MNAR	TYMDVMREQHLTKEER			Q20170801-09	115.278	151	0.00029	1	1304	145832	HUMAN	Splicing factor 3B subunit 1
[102]		O43396	TXNL1_HUMAN	2	8	6.46	2.3e-11	805.737	3	1770000	0.29	-	MVGVKPVGSDPDFQPELSGAGSR		Abu@N-term	Q20170801-07	162.286	1	2.3e-11	1	289	32251.6	HUMAN	Thioredoxin-like protein 1
[102]		O43396	TXNL1_HUMAN	2	8	6.46	2.3e-11	811.069	3	295674	0.65	-	MVGVKPVGSDPDFQPELSGAGSR		Abu@N-term;Oxidation@1	Q20170801-09	152.492	1	8.7e-11	1	289	32251.6	HUMAN	Thioredoxin-like protein 1
[103]		P35222	CTNB1_HUMAN	2	3.5	6.71	1.2e-12	690.315	2	65058	-0.033	AIVR	TMQNTNDVETAR			Q20170801-09	48.026	201	1.2e-12	1	781	85497.4	HUMAN	Catenin beta-1
[103]		P35222	CTNB1_HUMAN	2	3.5	6.71	1.2e-12	812.89	2	100	-1.8	TQRR	TSMGGTQQQFVEGVR			Q20170801-09	122.532	551	4.5e-11	1	781	85497.4	HUMAN	Catenin beta-1
[104]		Q9NTJ3	SMC4_HUMAN	3	2.3	6.12	1e-10	549.799	2	243752	-0.068	YLSR	HNTAVSQLTK			Q20170801-09	40.1807	513	1e-10	1	1288	147183	HUMAN	Structural maintenance of chromosomes protein 4
[104]		Q9NTJ3	SMC4_HUMAN	3	2.3	6.12	1e-10	388.224	3	203361	-1.5	GKKK	TFKDVGNLLR			Q20170801-09	138.907	205	8.4e-06	1	1288	147183	HUMAN	Structural maintenance of chromosomes protein 4
[104]		Q9NTJ3	SMC4_HUMAN	3	2.3	6.12	1e-10	359.205	3	243939	1.3	QEKK	SGRIPGIYGR			Q20170801-09	88.8784	609	0.0001	1	1288	147183	HUMAN	Structural maintenance of chromosomes protein 4
[105]		P22234	PUR6_HUMAN	3	8.7	4.7	5.1e-09	697.32	2	112773	-1.7	KIKK	ACGNFGIPCELR	Carbamidomethyl@2;Carbamidomethyl@9		Q20170801-09	154.775	287	5.1e-09	1	425	47079.7	HUMAN	Multifunctional protein ADE2
[105]		P22234	PUR6_HUMAN	3	8.7	4.7	5.1e-09	739.891	2	214671	0.72	YEGK	TKEVYELLDSPGK			Q20170801-09	134.701	18	8.3e-09	1	425	47079.7	HUMAN	Multifunctional protein ADE2
[105]		P22234	PUR6_HUMAN	3	8.7	4.7	5.1e-09	593.346	2	136277	1.1	-	MATAEVLNIGKK		Met-loss+Acetyl@1	Q20170801-09	140.034	1	4.4e-06	1	425	47079.7	HUMAN	Multifunctional protein ADE2
[106]		P04264	K2C1_HUMAN	5	9.9	5.21	5.2e-11	642.79	2	81489	0.84	FSSC	GGGGGSFGAGGGFGSR			Q20170801-07	92.242	50	5.2e-11	1	644	66039.2	HUMAN	Keratin, type II cytoskeletal 1
[106]		P04264	K2C1_HUMAN	5	9.9	5.21	5.2e-11	679.337	3	221278	0.29	NVIL	SMDNNRSLDLDSIIAEVK		Oxidation@2	Q20170801-09	186.666	338	8.1e-09	1	644	66039.2	HUMAN	Keratin, type II cytoskeletal 1
[106]		P04264	K2C1_HUMAN	5	9.9	5.21	5.2e-11	458.229	3	237148	0.098	-	MSRQFSSRSGYR		Met-loss+Acetyl@1	Q20170801-07	58.3781	1	0.00015	1	644	66039.2	HUMAN	Keratin, type II cytoskeletal 1
[106]		P04264	K2C1_HUMAN	5	9.9	5.21	5.2e-11	437.753	2	959915	-0.41	FGSR	SLVNLGGSK			Q20170801-09	89.0127	66	0.00048	1	644	66039.2	HUMAN	Keratin, type II cytoskeletal 1
[106]		P04264	K2C1_HUMAN	5	9.9	5.21	5.2e-11	533.264	2	139957	0.41	AEVK	AQYEDIAQK			Q20170801-07	61.7662	356	0.0031	1	644	66039.2	HUMAN	Keratin, type II cytoskeletal 1
[107]		P30153	2AAA_HUMAN	4	8.5	4.87	4.4e-10	759.346	2	82171	-1.3	FTSR	TSACGLFSVCYPR	Carbamidomethyl@4;Carbamidomethyl@10		Q20170801-07	169.265	145	4.4e-10	2	589	65309.2	HUMAN	Serine/threonine-protein phosphatase 2A 65 kDa regulatory subunit A alpha isoform
[107]		P30153	2AAA_HUMAN	4	8.5	4.87	4.4e-10	555.274	2	203596	2.8	LVKR	LAGGDWFTSR			Q20170801-09	148.643	135	3.5e-08	1	589	65309.2	HUMAN	Serine/threonine-protein phosphatase 2A 65 kDa regulatory subunit A alpha isoform
[107]		P30153	2AAA_HUMAN	4	8.5	4.87	4.4e-10	746.03	3	135921	0.66	EITK	TDLVPAFQNLMKDCEAEVR	Carbamidomethyl@14		Q20170801-09	192.12	281	1.3e-06	1	589	65309.2	HUMAN	Serine/threonine-protein phosphatase 2A 65 kDa regulatory subunit A alpha isoform
[107]		P30153	2AAA_HUMAN	4	8.5	4.87	4.4e-10	483.782	2	299912	0.98	ITTK	HMLPTVLR			Q20170801-09	117.365	520	6.5e-06	1	589	65309.2	HUMAN	Serine/threonine-protein phosphatase 2A 65 kDa regulatory subunit A alpha isoform
[108]		P39019	RS19_HUMAN	3	21.4	7.44	3.6e-13	572.641	3	893564	0.034	-	MPGVTVKDVNQQEFVR		Met-loss@1	Q20170801-07	125.502	1	3.6e-13	1	145	16060.6	HUMAN	40S ribosomal protein S19
[108]		P39019	RS19_HUMAN	3	21.4	7.44	3.6e-13	377.85	3	101502	-0.036	GRQR	NGVMPSHFSR			Q20170801-09	73.7143	85	0.00023	1	145	16060.6	HUMAN	40S ribosomal protein S19
[108]		P39019	RS19_HUMAN	3	21.4	7.44	3.6e-13	351.208	2	373555	0.18	STAR	HLYLR			Q20170801-09	48.074	63	0.0021	20	145	16060.6	HUMAN	40S ribosomal protein S19
[109]		P78344	IF4G2_HUMAN	3	4.4	6.12	6.2e-12	616.647	3	244103	0.83	HYPK	TAGNSEFLGKTPGQNAQK			Q20170801-09	79.5642	32	6.2e-12	1	907	102363	HUMAN	Eukaryotic translation initiation factor 4 gamma 2
[109]		P78344	IF4G2_HUMAN	3	4.4	6.12	6.2e-12	770.365	2	78991	-4.6	QGMR	SDFFLEGPFMPPR			Q20170801-09	199.511	348	3.3e-07	1	907	102363	HUMAN	Eukaryotic translation initiation factor 4 gamma 2
[109]		P78344	IF4G2_HUMAN	3	4.4	6.12	6.2e-12	551.289	2	150224	-5.6	RAPK	HFLPEMLSK			Q20170801-09	142.932	576	2.8e-05	1	907	102363	HUMAN	Eukaryotic translation initiation factor 4 gamma 2
[110]		P11908	PRPS2_HUMAN	2	8.8	8.14	1.8e-14	628.989	3	226058	-2	-	MPNIVLFSGSSHQDLSQR		Met-loss@1	Q20170801-09	147.358	1	1.8e-14	1	318	34769.4	HUMAN	Ribose-phosphate pyrophosphokinase 2
[110]		P11908	PRPS2_HUMAN	2	8.8	8.14	1.8e-14	377.878	3	685890	-0.44	EVDR	MVLVGDVKDR			Q20170801-07	101.374	205	3.2e-08	2	318	34769.4	HUMAN	Ribose-phosphate pyrophosphokinase 2
[111]		P14866	HNRPL_HUMAN	3	5.4	6.28	3.3e-13	561.256	2	289693	-0.21	YTLK	LCFSTAQHAS	Carbamidomethyl@2		Q20170801-09	83.2664	580	3.3e-13	1	589	64133.3	HUMAN	Heterogeneous nuclear ribonucleoprotein L
[111]		P14866	HNRPL_HUMAN	3	5.4	6.28	3.3e-13	651.309	2	100	1.2	DVLY	TICNPCGPVQR	Carbamidomethyl@3;Carbamidomethyl@6		Q20170801-09	71.4553	213	1.1e-07	1	589	64133.3	HUMAN	Heterogeneous nuclear ribonucleoprotein L
[111]		P14866	HNRPL_HUMAN	3	5.4	6.28	3.3e-13	611.801	2	175162	-0.35	KSER	SSSGLLEWESK			Q20170801-09	143.559	542	4.6e-06	1	589	64133.3	HUMAN	Heterogeneous nuclear ribonucleoprotein L
[112]		P43243	MATR3_HUMAN	4	4.7	3.75	5e-08	605.29	2	202130	-1.7	KRRR	TEEGPTLSYGR			Q20170801-09	91.9432	150	5e-08	1	847	94624	HUMAN	Matrin-3
[112]		P43243	MATR3_HUMAN	4	4.7	3.75	5e-08	662.838	2	79840	-1.6	VGPR	GNLGAGNGNLQGPR			Q20170801-09	73.2315	374	4.3e-07	1	847	94624	HUMAN	Matrin-3
[112]		P43243	MATR3_HUMAN	4	4.7	3.75	5e-08	648.83	2	153294	-1.3	-	MSKSFQQSSLSR		Met-loss+Acetyl@1	Q20170801-09	78.9139	1	4.7e-07	1	847	94624	HUMAN	Matrin-3
[112]		P43243	MATR3_HUMAN	4	4.7	3.75	5e-08	513.247	3	163666	1.3	KRRR	TEEGPTLSYGRDGR			Q20170801-09	80.6046	150	0.00028	1	847	94624	HUMAN	Matrin-3
[113]		P18669	PGAM1_HUMAN	3	14.6	5.92	2.3e-10	544.29	3	238512	-0.29	LNER	HYGGLTGLNKAETAAK			Q20170801-07	94.0167	91	2.3e-10	3	254	28804.2	HUMAN	Phosphoglycerate mutase 1
[113]		P18669	PGAM1_HUMAN	3	14.6	5.92	2.3e-10	806.372	3	166895	-3.7	IWRR	SYDVPPPPMEPDHPFYSNISK			Q20170801-09	170.587	118	7.8e-07	2	254	28804.2	HUMAN	Phosphoglycerate mutase 1
[113]		P18669	PGAM1_HUMAN	3	14.6	5.92	2.3e-10	530.283	2	578522	0.24	LNER	HYGGLTGLNK			Q20170801-09	72.4461	91	2.8e-06	3	254	28804.2	HUMAN	Phosphoglycerate mutase 1
[114]		Q15029	U5S1_HUMAN	2	2.9	8.92	6.7e-16	673.321	3	271289	0.85	HHGK	TCFVDCLIEQTHPEIR	Carbamidomethyl@2;Carbamidomethyl@6		Q20170801-09	182.868	143	6.7e-16	1	972	109437	HUMAN	116 kDa U5 small nuclear ribonucleoprotein component
[114]		Q15029	U5S1_HUMAN	2	2.9	8.92	6.7e-16	628.859	2	75869	1.3	VGIK	STPVTVVLPDTK			Q20170801-09	141.715	183	5.6e-05	1	972	109437	HUMAN	116 kDa U5 small nuclear ribonucleoprotein component
[115]		O43169	CYB5B_HUMAN	1	13	11.69	4.9e-21	645.949	3	3120000	0.14	LLEQ	AGVDASESFEDVGHSSDAR			Q20170801-07	111.846	66	4.9e-21	1	146	16332.3	HUMAN	Cytochrome b5 type B
[116]		Q8NHV4	NEDD1_HUMAN	2	2.7	6.52	1.8e-11	907.479	2	291242	-0.45	VNKR	SVNVNAASGGVQNSGIVR		Abu@N-term	Q20170801-09	129.988	325	1.8e-11	1	660	71966.7	HUMAN	Protein NEDD1
[116]		Q8NHV4	NEDD1_HUMAN	2	2.7	6.52	1.8e-11	864.953	2	58629	-0.12	VNKR	SVNVNAASGGVQNSGIVR			Q20170801-09	118.613	325	7.6e-09	1	660	71966.7	HUMAN	Protein NEDD1
[117]		Q5JRX3	PREP_HUMAN	2	3.1	8.14	1.8e-14	1033.5	2	170537	0.21	RAGR	TLTPAGDLQETFSGMDQVR			Q20170801-09	186.002	729	1.8e-14	1	1037	117414	HUMAN	Presequence protease, mitochondrial
[117]		Q5JRX3	PREP_HUMAN	2	3.1	8.14	1.8e-14	722.36	2	20096	0.75	ECIR	TVPYTDPDHASLK			Q20170801-09	94.2584	872	1.1e-05	1	1037	117414	HUMAN	Presequence protease, mitochondrial
[118]		O95071	UBR5_HUMAN	2	1	6.87	2.4e-14	759.304	2	49668	-1.5	KLKR	TSPTAYCDCWEK	Carbamidomethyl@7;Carbamidomethyl@9		Q20170801-09	113.649	1226	2.4e-14	1	2799	309355	HUMAN	E3 ubiquitin-protein ligase UBR5
[118]		O95071	UBR5_HUMAN	2	1	6.87	2.4e-14	870.418	2	71750	2.4	RPGR	TSDSPWFLSGSETLGR			Q20170801-07	186.278	107	2.9e-09	1	2799	309355	HUMAN	E3 ubiquitin-protein ligase UBR5
[119]		Q96HY6	DDRGK_HUMAN	2	10.2	7.19	1e-12	626.642	3	108369	0.76	SRGR	AASAGQEPLHNEELAGAGR			Q20170801-07	92.3907	28	1e-12	1	314	35611.1	HUMAN	DDRGK domain-containing protein 1
[119]		Q96HY6	DDRGK_HUMAN	2	10.2	7.19	1e-12	709.867	2	143873	-1.1	GAGR	VAQPGPLEPEEPR			Q20170801-09	105.299	47	5.9e-07	1	314	35611.1	HUMAN	DDRGK domain-containing protein 1
[120]		Q92928	RAB1C_HUMAN	3	14.9	5.42	1.9e-09	481.245	3	345509	-0.51	IKKQ	MGPGAASGGERPNLK			Q20170801-09	68.2804	173	1.9e-09	2	201	22017.2	HUMAN	Putative Ras-related protein Rab-1C
[120]		Q92928	RAB1C_HUMAN	3	14.9	5.42	1.9e-09	495.748	2	251074	0.61	ERFW	TITSSYYR			Q20170801-07	75.6272	72	8e-07	3	201	22017.2	HUMAN	Putative Ras-related protein Rab-1C
[120]		Q92928	RAB1C_HUMAN	3	14.9	5.42	1.9e-09	388.213	2	80344	-1.1	FKIQ	TIELDGK			Q20170801-09	55.4214	49	0.016	5	201	22017.2	HUMAN	Putative Ras-related protein Rab-1C
[120-1]	1	P62820	RAB1A_HUMAN	3	15.1	4.54	3.7e-09	492.249	3	289191	0.41	IKKR	MGPGATAGGAEKSNVK			Q20170801-09	40.4577	176	3.7e-09	1	205	22678	HUMAN	Ras-related protein Rab-1A
[120-1]	1	P62820	RAB1A_HUMAN	3	15.1	4.54	3.7e-09	495.749	2	457173	1	ERFR	TITSSYYR			Q20170801-09	73.6505	75	1.5e-06	3	205	22678	HUMAN	Ras-related protein Rab-1A
[120-1]	1	P62820	RAB1A_HUMAN	3	15.1	4.54	3.7e-09	388.213	2	80344	-1.1	FKIR	TIELDGK			Q20170801-09	55.4214	52	0.016	5	205	22678	HUMAN	Ras-related protein Rab-1A
[121]		P30419	NMT1_HUMAN	2	2.4	5.98	3.8e-11	748.364	2	921592	-0.26	ASKR	SYQFWDTQPVPK			Q20170801-09	165.042	116	3.8e-11	1	496	56806.7	HUMAN	Glycylpeptide N-tetradecanoyltransferase 1
[121]		P30419	NMT1_HUMAN	2	2.4	5.98	3.8e-11	790.891	2	284683	-0.094	ASKR	SYQFWDTQPVPK		Abu@N-term	Q20170801-09	168.9	116	1.5e-09	1	496	56806.7	HUMAN	Glycylpeptide N-tetradecanoyltransferase 1
[122]		Q16555	DPYL2_HUMAN	2	4.7	7.72	1.3e-14	1043.95	2	214306	-0.56	ISAK	THNSSLEYNIFEGMECR	Carbamidomethyl@16		Q20170801-09	174.64	424	1.3e-14	1	572	62294.2	HUMAN	Dihydropyrimidinase-related protein 2
[122]		Q16555	DPYL2_HUMAN	2	4.7	7.72	1.3e-14	516.278	2	82024	-0.25	VMSK	SSAEVIAQAR			Q20170801-09	58.818	259	2e-06	1	572	62294.2	HUMAN	Dihydropyrimidinase-related protein 2
[123]		Q6P2Q9	PRP8_HUMAN	4	1.8	4.41	4.6e-09	696.345	2	53699	2.1	LHLR	TNHIYVSSDDIK			Q20170801-09	86.7653	2087	4.6e-09	1	2335	273603	HUMAN	Pre-mRNA-processing-splicing factor 8
[123]		Q6P2Q9	PRP8_HUMAN	4	1.8	4.41	4.6e-09	579.668	3	226404	-0.094	ALIR	SLPVEEQPKQIIVTR			Q20170801-09	135.024	1851	9.1e-08	1	2335	273603	HUMAN	Pre-mRNA-processing-splicing factor 8
[123]		Q6P2Q9	PRP8_HUMAN	4	1.8	4.41	4.6e-09	423.9	3	202471	0.74	WRVR	TDFKQYQVLK			Q20170801-09	115.823	1440	0.0007	1	2335	273603	HUMAN	Pre-mRNA-processing-splicing factor 8
[123]		Q6P2Q9	PRP8_HUMAN	4	1.8	4.41	4.6e-09	384.229	2	257431	-1.7	RIKR	HLLTQR			Q20170801-09	26.9182	884	0.003	3	2335	273603	HUMAN	Pre-mRNA-processing-splicing factor 8
[124]		Q01082	SPTB2_HUMAN	2	1.2	5.69	4e-10	684.384	2	77852	-1.9	RKAK	TALPAQSAATLPAR			Q20170801-07	119.476	2178	4e-10	1	2364	274612	HUMAN	Spectrin beta chain, non-erythrocytic 1
[124]		Q01082	SPTB2_HUMAN	2	1.2	5.69	4e-10	854.902	2	97672	0.71	LPAR	TQETPSAQMEGFLNR			Q20170801-09	159.594	2192	3e-09	1	2364	274612	HUMAN	Spectrin beta chain, non-erythrocytic 1
[125]		P61254	RL26_HUMAN	3	22.8	4.8	6.1e-10	360.189	3	520036	-1.3	NRKR	HFNAPSHIR			Q20170801-09	50.6894	18	6.1e-10	1	145	17258.4	HUMAN	60S ribosomal protein L26
[125]		P61254	RL26_HUMAN	3	22.8	4.8	6.1e-10	383.908	3	82026	-0.92	VHVG	IHPSKVVITR			Q20170801-09	58.1667	99	2.6e-07	2	145	17258.4	HUMAN	60S ribosomal protein L26
[125]		P61254	RL26_HUMAN	3	22.8	4.8	6.1e-10	557.967	3	236679	1.1	YNVR	SMPIRKDDEVQVVR			Q20170801-09	91.1043	46	2.7e-06	2	145	17258.4	HUMAN	60S ribosomal protein L26
[125-1]	1	Q9UNX3	RL26L_HUMAN	3	22.8	2.59	2.6e-07	383.908	3	82026	-0.92	VHVG	IHPSKVVITR			Q20170801-09	58.1667	99	2.6e-07	2	145	17256.4	HUMAN	60S ribosomal protein L26-like 1
[125-1]	1	Q9UNX3	RL26L_HUMAN	3	22.8	2.59	2.6e-07	557.967	3	236679	1.1	YNVR	SMPIRKDDEVQVVR			Q20170801-09	91.1043	46	2.7e-06	2	145	17256.4	HUMAN	60S ribosomal protein L26-like 1
[125-1]	1	Q9UNX3	RL26L_HUMAN	3	22.8	2.59	2.6e-07	355.517	3	173026	-1.4	NRKR	HFNAPSHVR			Q20170801-09	35.7388	18	4.4e-06	1	145	17256.4	HUMAN	60S ribosomal protein L26-like 1
[126]		P35606	COPB2_HUMAN	4	4.4	4.29	2.9e-10	618.308	2	151753	-0.29	TLVK	TFEVCDLPVR	Carbamidomethyl@5		Q20170801-07	161.038	52	2.9e-10	1	906	102488	HUMAN	Coatomer subunit beta'
[126]		P35606	COPB2_HUMAN	4	4.4	4.29	2.9e-10	525.782	2	2290000	-0.25	FLAR	TYLPSQVSR			Q20170801-09	92.9854	760	2.2e-07	1	906	102488	HUMAN	Coatomer subunit beta'
[126]		P35606	COPB2_HUMAN	4	4.4	4.29	2.9e-10	434.583	3	471177	0.78	LLIR	TGRLPEAAFLAR			Q20170801-09	139.448	748	3.8e-05	1	906	102488	HUMAN	Coatomer subunit beta'
[126]		P35606	COPB2_HUMAN	4	4.4	4.29	2.9e-10	367.545	3	128472	-0.046	KEQR	TRVAHFLEK			Q20170801-09	71.8645	619	0.0027	1	906	102488	HUMAN	Coatomer subunit beta'
[127]		O43242	PSMD3_HUMAN	2	5.1	5.59	1.9e-10	706.849	2	184531	-0.21	VLYK	AVQGFFTSNNATR			Q20170801-09	120.893	116	1.9e-10	1	534	60978.1	HUMAN	26S proteasome non-ATPase regulatory subunit 3
[127]		O43242	PSMD3_HUMAN	2	5.1	5.59	1.9e-10	831.385	2	109496	-1.9	LVSK	SVFPEQANNNEWAR			Q20170801-09	143.645	274	4.4e-10	1	534	60978.1	HUMAN	26S proteasome non-ATPase regulatory subunit 3
[128]		P26196	DDX6_HUMAN	3	9.5	4.46	5.5e-10	563.263	4	151248	-1.1	LRIK	TSDVTSTKGNEFEDYCLKR	Carbamidomethyl@16		Q20170801-09	115.856	87	5.5e-10	1	483	54417.3	HUMAN	Probable ATP-dependent RNA helicase DDX6
[128]		P26196	DDX6_HUMAN	3	9.5	4.46	5.5e-10	664.645	3	490340	-0.74	NIDK	SLYVAEYHSEPVEDEKP			Q20170801-09	132.42	467	3.8e-09	1	483	54417.3	HUMAN	Probable ATP-dependent RNA helicase DDX6
[128]		P26196	DDX6_HUMAN	3	9.5	4.46	5.5e-10	394.252	3	294568	-0.44	DWKK	TLKLPPKDLR			Q20170801-09	92.2038	75	2.4e-06	1	483	54417.3	HUMAN	Probable ATP-dependent RNA helicase DDX6
[129]		P04632	CPNS1_HUMAN	2	9.3	5.93	1.2e-11	593.27	3	251177	-1.1	PPPR	THYSNIEANESEEVR			Q20170801-09	80.7659	85	1.2e-11	1	268	28316	HUMAN	Calpain small subunit 1
[129]		P04632	CPNS1_HUMAN	2	9.3	5.93	1.2e-11	571.251	2	190699	0.19	PDLK	TDGFGIDTCR	Carbamidomethyl@9		Q20170801-09	103.325	136	6.3e-10	1	268	28316	HUMAN	Calpain small subunit 1
[130]		Q9Y678	COPG1_HUMAN	3	3.7	5.23	8.1e-10	510.28	3	240201	2.2	AEQR	TESTPITAVKQPEK			Q20170801-09	75.0232	591	8.1e-10	1	874	97719.2	HUMAN	Coatomer subunit gamma-1
[130]		Q9Y678	COPG1_HUMAN	3	3.7	5.23	8.1e-10	507.534	4	212071	1.1	AEQR	TESTPITAVKQPEKVAATR			Q20170801-09	96.8382	591	3e-06	1	874	97719.2	HUMAN	Coatomer subunit gamma-1
[130]		Q9Y678	COPG1_HUMAN	3	3.7	5.23	8.1e-10	685.862	2	81074	5.2	FDLK	SVPLATAPMAEQR			Q20170801-09	119.702	578	0.0002	1	874	97719.2	HUMAN	Coatomer subunit gamma-1
[131]		O75306	NDUS2_HUMAN	2	6.5	6.26	1.4e-12	443.891	3	767186	-2.2	AEMK	TSMESLIHHFK			Q20170801-09	135.81	373	1.4e-12	1	463	52546.1	HUMAN	NADH dehydrogenase [ubiquinone] iron-sulfur protein 2, mitochondrial
[131]		O75306	NDUS2_HUMAN	2	6.5	6.26	1.4e-12	738.684	3	114667	1.5	DLRK	TQPYDVYDQVEFDVPVGSR			Q20170801-09	187.234	305	2.3e-09	1	463	52546.1	HUMAN	NADH dehydrogenase [ubiquinone] iron-sulfur protein 2, mitochondrial
[132]		P49841	GSK3B_HUMAN	2	7.6	5.92	4.9e-11	763.357	3	194843	-5	GRPR	TTSFAESCKPVQQPSAFGSMK	Carbamidomethyl@8		Q20170801-09	135.904	7	4.9e-11	1	420	46744.7	HUMAN	Glycogen synthase kinase-3 beta
[132]		P49841	GSK3B_HUMAN	2	7.6	5.92	4.9e-11	607.815	2	234840	1.8	FRPR	TPPEAIALCSR	Carbamidomethyl@9		Q20170801-09	113.191	309	5.5e-09	1	420	46744.7	HUMAN	Glycogen synthase kinase-3 beta
[133]		P06454	PTMA_HUMAN	2	16.2	5.74	6.7e-11	733.847	2	121309	0.31	-	MSDAAVDTSSEITTK		Met-loss+Acetyl@1	Q20170801-09	117.21	1	6.7e-11	1	111	12203	HUMAN	Prothymosin alpha
[133]		P06454	PTMA_HUMAN	2	16.2	5.74	6.7e-11	911.949	2	99139	-0.019	-	MSDAAVDTSSEITTKDLK		Met-loss+Acetyl@1	Q20170801-09	138.825	1	1.8e-09	1	111	12203	HUMAN	Prothymosin alpha
[134]		P16615	AT2A2_HUMAN	2	2.5	5.9	7.2e-11	509.575	3	115062	1.3	RDRK	SMSVYCTPNKPSR	Carbamidomethyl@6		Q20170801-07	76.3669	493	7.2e-11	1	1042	114758	HUMAN	Sarcoplasmic/endoplasmic reticulum calcium ATPase 2
[134]		P16615	AT2A2_HUMAN	2	2.5	5.9	7.2e-11	734.847	2	177850	-0.98	CSDK	TGTLTTNQMSVCR	Carbamidomethyl@12		Q20170801-09	95.9613	353	9.4e-11	2	1042	114758	HUMAN	Sarcoplasmic/endoplasmic reticulum calcium ATPase 2
[135]		P51398	RT29_HUMAN	2	4	6.52	1.8e-11	909.479	2	208871	0.54	QARQ	SIAAHLDNQVPVESPR		Abu@N-term	Q20170801-09	134.797	31	1.8e-11	1	398	45566.8	HUMAN	28S ribosomal protein S29, mitochondrial
[135]		P51398	RT29_HUMAN	2	4	6.52	1.8e-11	578.304	3	396354	-0.13	QARQ	SIAAHLDNQVPVESPR			Q20170801-09	125.272	31	5.3e-07	1	398	45566.8	HUMAN	28S ribosomal protein S29, mitochondrial
[136]		P49840	GSK3A_HUMAN	2	10.8	7.27	1.3e-13	811.693	3	91805	-0.45	GRAR	TSSFAEPGGGGGGGGGGPGGSASGPGGTGGGK			Q20170801-09	88.3435	19	1.3e-13	1	483	50981.2	HUMAN	Glycogen synthase kinase-3 alpha
[136]		P49840	GSK3A_HUMAN	2	10.8	7.27	1.3e-13	731.366	3	101814	-2.7	FKSR	TPPEAIALCSSLLEYTPSSR	Carbamidomethyl@9		Q20170801-09	193.602	372	2.6e-06	1	483	50981.2	HUMAN	Glycogen synthase kinase-3 alpha
[137]		P52209	6PGD_HUMAN	3	9.1	4.88	2e-08	768.9	2	220348	1.2	AFNR	TVSKVDDFLANEAK			Q20170801-09	130.802	35	2e-08	1	483	53140.5	HUMAN	6-phosphogluconate dehydrogenase, decarboxylating
[137]		P52209	6PGD_HUMAN	3	9.1	4.88	2e-08	759.662	3	220858	0.68	IAAK	VGTGEPCCDWVGDEGAGHFVK	Carbamidomethyl@7;Carbamidomethyl@8		Q20170801-09	152.228	164	7.2e-07	1	483	53140.5	HUMAN	6-phosphogluconate dehydrogenase, decarboxylating
[137]		P52209	6PGD_HUMAN	3	9.1	4.88	2e-08	474.78	2	954344	0.6	PHIK	TIFQGIAAK			Q20170801-07	125.984	155	2.7e-06	1	483	53140.5	HUMAN	6-phosphogluconate dehydrogenase, decarboxylating
[138]		Q6IAA8	LTOR1_HUMAN	2	23	5.79	3.8e-11	890.057	3	29446	-2.3	ILAK	TASNIIDVSAADSQGMEQHEYMDR			Q20170801-09	159.482	61	3.8e-11	1	161	17745	HUMAN	Ragulator complex protein LAMTOR1
[138]		Q6IAA8	LTOR1_HUMAN	2	23	5.79	3.8e-11	694.885	2	264805	-1.1	PSAR	TDEQALLSSILAK			Q20170801-09	189.877	48	3.6e-09	1	161	17745	HUMAN	Ragulator complex protein LAMTOR1
[139]		P26640	SYVC_HUMAN	4	4.2	3.56	6.1e-08	735.389	2	130259	0.16	LGLR	SSAQDPQAVLGALGR			Q20170801-09	161.954	123	6.1e-08	1	1264	140477	HUMAN	Valine--tRNA ligase
[139]		P26640	SYVC_HUMAN	4	4.2	3.56	6.1e-08	533.242	3	166854	-0.99	IAAR	YGEAGEGPGWGGAHPR			Q20170801-09	87.3661	24	4.2e-07	1	1264	140477	HUMAN	Valine--tRNA ligase
[139]		P26640	SYVC_HUMAN	4	4.2	3.56	6.1e-08	664.834	2	276117	-2	VGQR	HGLEAISIMDSR			Q20170801-09	143.324	607	1.4e-05	1	1264	140477	HUMAN	Valine--tRNA ligase
[139]		P26640	SYVC_HUMAN	4	4.2	3.56	6.1e-08	584.811	2	60991	-0.19	AHPR	ICLQPPPTSR	Carbamidomethyl@2		Q20170801-09	105.484	40	0.00048	1	1264	140477	HUMAN	Valine--tRNA ligase
[140]		P12277	KCRB_HUMAN	3	8.1	4.6	5.2e-09	372.192	3	3460000	-1.6	-	MPFSNSHNALK		Met-loss@1	Q20170801-09	37.8504	1	5.2e-09	1	381	42644.7	HUMAN	Creatine kinase B-type
[140]		P12277	KCRB_HUMAN	3	8.1	4.6	5.2e-09	391.848	3	344759	0.2	SIRG	FCLPPHCSR	Carbamidomethyl@2;Carbamidomethyl@7		Q20170801-09	98.6702	140	1.3e-06	1	381	42644.7	HUMAN	Creatine kinase B-type
[140]		P12277	KCRB_HUMAN	3	8.1	4.6	5.2e-09	652.368	2	392650	2.3	HMAK	VLTPELYAELR			Q20170801-09	173.686	33	4.6e-05	1	381	42644.7	HUMAN	Creatine kinase B-type
[141]		P07355	ANXA2_HUMAN	3	12.7	3.8	2e-06	622.815	2	580180	0.3	ICSR	TNQELQEINR			Q20170801-09	74.2945	136	2e-06	2	339	38604.4	HUMAN	Annexin A2
[141]		P07355	ANXA2_HUMAN	3	12.7	3.8	2e-06	547.272	3	221371	1.7	GLLK	TPAQYDASELKASMK			Q20170801-09	112.586	105	1e-05	2	339	38604.4	HUMAN	Annexin A2
[141]		P07355	ANXA2_HUMAN	3	12.7	3.8	2e-06	615.637	3	212525	-3.6	ILCK	LSLEGDHSTPPSAYGSVK			Q20170801-09	122.294	11	3.7e-05	2	339	38604.4	HUMAN	Annexin A2
[142]		Q15020	SART3_HUMAN	3	3.4	4.84	2.3e-08	795.887	2	440695	1.4	TMER	TEGSLEDWDIAVQK			Q20170801-09	169.276	555	2.3e-08	1	963	109936	HUMAN	Squamous cell carcinoma antigen recognized by T-cells 3
[142]		Q15020	SART3_HUMAN	3	3.4	4.84	2.3e-08	421.224	3	190547	-0.42	KEEK	SALQALEMDRK			Q20170801-09	112.134	758	2.9e-06	1	963	109936	HUMAN	Squamous cell carcinoma antigen recognized by T-cells 3
[142]		Q15020	SART3_HUMAN	3	3.4	4.84	2.3e-08	464.285	2	356796	1.1	GKGR	TQLSLLPR			Q20170801-07	139.189	911	0.0023	1	963	109936	HUMAN	Squamous cell carcinoma antigen recognized by T-cells 3
[143]		Q01813	PFKAP_HUMAN	2	4.2	5.75	1.5e-10	424.223	3	448862	0.57	LRGR	SFAGNLNTYKR			Q20170801-07	92.6164	386	1.5e-10	1	784	85596.9	HUMAN	ATP-dependent 6-phosphofructokinase, platelet type
[143]		Q01813	PFKAP_HUMAN	2	4.2	5.75	1.5e-10	724.033	3	154027	-0.38	QIPK	TNCNVAVINVGAPAAGMNAAVR	Carbamidomethyl@3		Q20170801-09	167.521	409	1e-07	1	784	85596.9	HUMAN	ATP-dependent 6-phosphofructokinase, platelet type
[144]		P55196	AFAD_HUMAN	4	2.6	3.32	1e-07	703.881	2	175035	2.3	SYLK	TQVLSPDSLFTAK			Q20170801-09	174.139	1717	1e-07	1	1824	206806	HUMAN	Afadin
[144]		P55196	AFAD_HUMAN	4	2.6	3.32	1e-07	693.304	2	30130	0.83	VTPR	SMDAETYVEGQR			Q20170801-09	108.963	465	3.7e-07	1	1824	206806	HUMAN	Afadin
[144]		P55196	AFAD_HUMAN	4	2.6	3.32	1e-07	434.239	3	153430	-1.9	LAKR	SVDGGLMVKGPR		Abu@N-term	Q20170801-09	106.174	512	4.3e-06	1	1824	206806	HUMAN	Afadin
[144]		P55196	AFAD_HUMAN	4	2.6	3.32	1e-07	567.323	2	248945	-1.5	LMTR	TSSVVTLEVAK			Q20170801-09	116.269	1081	0.00039	1	1824	206806	HUMAN	Afadin
[145]		P60468	SC61B_HUMAN	2	28.1	6.2	7e-11	685.837	2	220375	0.12	-	MPGPTPSGTNVGSSGR		Met-loss@1	Q20170801-09	51.1957	1	7e-11	1	96	9974.5	HUMAN	Protein transport protein Sec61 subunit beta
[145]		P60468	SC61B_HUMAN	2	28.1	6.2	7e-11	562.761	2	234278	-1.1	SAGR	TTSAGTGGMWR			Q20170801-07	79.704	47	1.2e-09	1	96	9974.5	HUMAN	Protein transport protein Sec61 subunit beta
[146]		P11586	C1TC_HUMAN	3	3.9	3.82	4e-08	600.319	2	312654	3.2	LNLK	TPVPSDIDISR			Q20170801-09	125.312	314	4e-08	1	935	101560	HUMAN	C-1-tetrahydrofolate synthase, cytoplasmic
[146]		P11586	C1TC_HUMAN	3	3.9	3.82	4e-08	689.84	2	71670	2.2	NAFK	TDTESELDLISR			Q20170801-09	150.366	761	1.6e-07	1	935	101560	HUMAN	C-1-tetrahydrofolate synthase, cytoplasmic
[146]		P11586	C1TC_HUMAN	3	3.9	3.82	4e-08	752.857	2	174360	-3.3	GIEK	TDPTTLTDEEINR			Q20170801-09	120.044	505	3.6e-06	1	935	101560	HUMAN	C-1-tetrahydrofolate synthase, cytoplasmic
[147]		P31153	METK2_HUMAN	2	5.1	5.15	2.3e-10	684.832	2	235375	-0.51	PDSK	TQVTVQYMQDR			Q20170801-09	106.601	182	2.3e-10	1	395	43661	HUMAN	S-adenosylmethionine synthase isoform type-2
[147]		P31153	METK2_HUMAN	2	5.1	5.15	2.3e-10	490.241	2	73874	-0.19	IYQR	TAAYGHFGR			Q20170801-09	52.7962	374	7.1e-10	1	395	43661	HUMAN	S-adenosylmethionine synthase isoform type-2
[148]		P25205	MCM3_HUMAN	3	3.3	6.53	1.8e-11	635.814	2	237913	0.54	DMDR	TAIHEVMEQGR			Q20170801-09	74.1016	420	1.8e-11	1	808	90981.6	HUMAN	DNA replication licensing factor MCM3
[148]		P25205	MCM3_HUMAN	3	3.3	6.53	1.8e-11	509.291	2	237398	-0.77	GTFR	TVLIACNVK	Carbamidomethyl@6		Q20170801-07	101.652	258	1.4e-05	1	808	90981.6	HUMAN	DNA replication licensing factor MCM3
[148]		P25205	MCM3_HUMAN	3	3.3	6.53	1.8e-11	423.258	2	815288	-0.0041	VTAR	TLETLIR			Q20170801-09	121.444	617	0.0033	5	808	90981.6	HUMAN	DNA replication licensing factor MCM3
[148-1]	1	O14980	XPO1_HUMAN	2	2	1.8	2.5e-05	818.904	2	168087	-1.9	GASR	TSESLCQNNMVILK	Carbamidomethyl@6		Q20170801-09	148.108	159	2.5e-05	1	1071	123387	HUMAN	Exportin-1
[148-1]	1	O14980	XPO1_HUMAN	2	2	1.8	2.5e-05	423.258	2	815288	-0.0041	LVHA	TLETLLR			Q20170801-09	121.444	225	0.0033	5	1071	123387	HUMAN	Exportin-1
[149]		Q13405	RM49_HUMAN	2	7.2	6.03	3.3e-11	722.364	2	86484	-2	GLRL	LSQTQGPPDYPR		Abu@N-term	Q20170801-09	97.4225	26	3.3e-11	1	166	19198.2	HUMAN	39S ribosomal protein L49, mitochondrial
[149]		Q13405	RM49_HUMAN	2	7.2	6.03	3.3e-11	665.822	2	50416	-0.81	LRLL	SQTQGPPDYPR		Abu@N-term	Q20170801-09	68.1331	27	2e-07	1	166	19198.2	HUMAN	39S ribosomal protein L49, mitochondrial
[150]		Q9UNM6	PSD13_HUMAN	4	11.4	3.14	1.2e-07	877.416	2	136123	-0.48	TDVK	SMEMLVEHQAHDILT			Q20170801-09	173.957	362	1.2e-07	1	376	42945.9	HUMAN	26S proteasome non-ATPase regulatory subunit 13
[150]		Q9UNM6	PSD13_HUMAN	4	11.4	3.14	1.2e-07	561.277	2	105961	-3.2	EKVK	SSDEAVILCK	Carbamidomethyl@9		Q20170801-09	92.2814	106	3.1e-07	1	376	42945.9	HUMAN	26S proteasome non-ATPase regulatory subunit 13
[150]		Q9UNM6	PSD13_HUMAN	4	11.4	3.14	1.2e-07	599.285	2	741053	0.96	MKDR	LEFWCTDVK	Carbamidomethyl@5		Q20170801-09	166.297	353	7.4e-07	1	376	42945.9	HUMAN	26S proteasome non-ATPase regulatory subunit 13
[150]		Q9UNM6	PSD13_HUMAN	4	11.4	3.14	1.2e-07	385.203	3	377873	0.033	VDKR	VHMTWVQPR			Q20170801-09	107.75	331	0.00056	1	376	42945.9	HUMAN	26S proteasome non-ATPase regulatory subunit 13
[151]		P19338	NUCL_HUMAN	4	7.5	2.85	8.8e-08	482.269	3	895327	0.73	VFEK	ATFIKVPQNQNGK			Q20170801-09	88.538	509	8.8e-08	1	710	76615	HUMAN	Nucleolin
[151]		P19338	NUCL_HUMAN	4	7.5	2.85	8.8e-08	734.013	3	62207	-0.47	LFVK	GLSEDTTEETLKESFDGSVR			Q20170801-09	164.46	578	2.9e-07	1	710	76615	HUMAN	Nucleolin
[151]		P19338	NUCL_HUMAN	4	7.5	2.85	8.8e-08	378.888	3	328868	-1.5	PNAR	SQPSKTLFVK			Q20170801-09	71.512	568	3.2e-07	1	710	76615	HUMAN	Nucleolin
[151]		P19338	NUCL_HUMAN	4	7.5	2.85	8.8e-08	484.798	2	57477	-0.83	PGKK	GAAIPAKGAK		Abu@N-term	Q20170801-09	25.6443	126	4.3e-06	1	710	76615	HUMAN	Nucleolin
[152]		Q7Z6Z7	HUWE1_HUMAN	4	0.8	3.67	2.4e-08	376.545	3	290563	-0.057	LTSK	TSTQKFFLR			Q20170801-09	102.175	3717	2.4e-08	1	4374	481895	HUMAN	E3 ubiquitin-protein ligase HUWE1
[152]		Q7Z6Z7	HUWE1_HUMAN	4	0.8	3.67	2.4e-08	638.847	2	230644	-1.9	TLSR	IVNQPSSLFGSK			Q20170801-07	130.219	2256	1e-06	1	4374	481895	HUMAN	E3 ubiquitin-protein ligase HUWE1
[152]		Q7Z6Z7	HUWE1_HUMAN	4	0.8	3.67	2.4e-08	496.255	2	233086	-1.1	NGAR	HLGYTLCK	Carbamidomethyl@7		Q20170801-09	74.4752	3629	2.2e-06	1	4374	481895	HUMAN	E3 ubiquitin-protein ligase HUWE1
[152]		Q7Z6Z7	HUWE1_HUMAN	4	0.8	3.67	2.4e-08	510.285	2	1250000	0.014	LGCR	TNIFQIQR			Q20170801-09	132.233	3298	0.0024	1	4374	481895	HUMAN	E3 ubiquitin-protein ligase HUWE1
[153]		P30084	ECHM_HUMAN	2	4.8	5.22	4.1e-09	749.383	2	223735	0.0073	WRPF	ASGANFEYIIAEK		Abu@N-term	Q20170801-07	166.662	28	4.1e-09	1	290	31387.7	HUMAN	Enoyl-CoA hydratase, mitochondrial
[153]		P30084	ECHM_HUMAN	2	4.8	5.22	4.1e-09	551.96	3	357009	2.8	WRPF	ASGANFEYIIAEKR		Abu@N-term	Q20170801-07	151.006	28	5.5e-08	1	290	31387.7	HUMAN	Enoyl-CoA hydratase, mitochondrial
[154]		Q9UHB9	SRP68_HUMAN	4	4.3	3.42	2.1e-07	385.58	3	389016	-0.5	WRGR	TVPVKIDKVR			Q20170801-09	67.115	302	2.1e-07	1	627	70730.2	HUMAN	Signal recognition particle subunit SRP68
[154]		Q9UHB9	SRP68_HUMAN	4	4.3	3.42	2.1e-07	534.309	2	330698	0.66	LEQK	TKSGLTGYIK			Q20170801-09	80.127	611	6.4e-07	1	627	70730.2	HUMAN	Signal recognition particle subunit SRP68
[154]		Q9UHB9	SRP68_HUMAN	4	4.3	3.42	2.1e-07	419.737	2	687494	0.35	QKTK	SGLTGYIK			Q20170801-07	106.925	613	1.5e-05	1	627	70730.2	HUMAN	Signal recognition particle subunit SRP68
[154]		Q9UHB9	SRP68_HUMAN	4	4.3	3.42	2.1e-07	392.21	2	418232	-1.8	GYIK	GIFGFRS			Q20170801-07	146.585	621	0.0021	1	627	70730.2	HUMAN	Signal recognition particle subunit SRP68
[155]		P08237	PFKAM_HUMAN	2	3.2	5.3	9.9e-10	819.39	2	100909	-2.4	RNGR	IFANTPDSGCVLGMR	Carbamidomethyl@10		Q20170801-09	162.21	700	9.9e-10	1	780	85183.3	HUMAN	ATP-dependent 6-phosphofructokinase, muscle type
[155]		P08237	PFKAM_HUMAN	2	3.2	5.3	9.9e-10	659.299	2	167651	-1.6	LRGR	SFMNNWEVYK			Q20170801-09	170.632	377	4.8e-08	1	780	85183.3	HUMAN	ATP-dependent 6-phosphofructokinase, muscle type
[156]		Q15084	PDIA6_HUMAN	1	4.1	9.68	2.5e-17	1071.52	2	697179	0.11	AVNG	LYSSSDDVIELTPSNFNR		Abu@N-term	Q20170801-09	183.298	20	2.5e-17	1	440	48121.7	HUMAN	Protein disulfide-isomerase A6
[157]		P07910	HNRPC_HUMAN	2	5.6	5.06	1.1e-09	607.296	3	516751	0.33	-	MASNVTNKTDPRSMNSR		Met-loss+Acetyl@1	Q20170801-09	75.3931	1	1.1e-09	1	306	33670.3	HUMAN	Heterogeneous nuclear ribonucleoproteins C1/C2
[157]		P07910	HNRPC_HUMAN	2	5.6	5.06	1.1e-09	622.815	2	684785	-0.065	-	MASNVTNKTDPR		Met-loss+Acetyl@1	Q20170801-09	52.4303	1	1.4e-08	1	306	33670.3	HUMAN	Heterogeneous nuclear ribonucleoproteins C1/C2
[158]		P15924	DESP_HUMAN	4	1.8	4	5.2e-09	708.366	3	104749	-3.9	PIKR	TMIQSPSGVILQEAADVHAR			Q20170801-09	175.969	983	5.2e-09	1	2871	331777	HUMAN	Desmoplakin
[158]		P15924	DESP_HUMAN	4	1.8	4	5.2e-09	354.545	3	285753	-0.55	FSGK	TVSVSEAIKK			Q20170801-09	62.7268	2104	4e-06	1	2871	331777	HUMAN	Desmoplakin
[158]		P15924	DESP_HUMAN	4	1.8	4	5.2e-09	560.788	2	277836	1.6	AINR	SMVEDITGLR			Q20170801-09	157.273	2792	8.5e-05	1	2871	331777	HUMAN	Desmoplakin
[158]		P15924	DESP_HUMAN	4	1.8	4	5.2e-09	458.584	3	47526	0.22	EAAK	TIQDKNKEIER			Q20170801-09	25.3727	1319	0.0005	1	2871	331777	HUMAN	Desmoplakin
[159]		P30101	PDIA3_HUMAN	2	5	4.96	2.3e-10	862.898	2	102058	-4.5	LAAA	SDVLELTDDNFESR		Abu@N-term	Q20170801-07	172.437	25	2.3e-10	1	505	56782.9	HUMAN	Protein disulfide-isomerase A3
[159]		P30101	PDIA3_HUMAN	2	5	4.96	2.3e-10	390.228	3	358933	-0.12	DGPR	TADGIVSHLKK			Q20170801-09	66.8707	120	8.8e-09	1	505	56782.9	HUMAN	Protein disulfide-isomerase A3
[160]		P34897	GLYM_HUMAN	3	6.9	4.33	2e-08	774.925	2	66552	2.8	LNPK	TGLIDYNQLALTAR			Q20170801-07	181.042	201	2e-08	1	504	55993.5	HUMAN	Serine hydroxymethyltransferase, mitochondrial
[160]		P34897	GLYM_HUMAN	3	6.9	4.33	2e-08	436.254	2	316781	0.72	PGDR	SAITPGGLR			Q20170801-09	77.499	417	8.1e-05	1	504	55993.5	HUMAN	Serine hydroxymethyltransferase, mitochondrial
[160]		P34897	GLYM_HUMAN	3	6.9	4.33	2e-08	495.244	3	127586	-0.29	VDPK	TGREIPYTFEDR			Q20170801-09	119.605	303	0.0018	1	504	55993.5	HUMAN	Serine hydroxymethyltransferase, mitochondrial
[161]		P28074	PSB5_HUMAN	4	11	3.24	3.2e-07	512.781	2	194153	0.46	FKFR	HGVIVAADSR			Q20170801-07	45.0427	69	3.2e-07	1	263	28480.5	HUMAN	Proteasome subunit beta type-5
[161]		P28074	PSB5_HUMAN	4	11	3.24	3.2e-07	362.209	3	179790	-2.7	MLHG	TTTLAFKFR			Q20170801-09	130.005	60	4.8e-06	1	263	28480.5	HUMAN	Proteasome subunit beta type-5
[161]		P28074	PSB5_HUMAN	4	11	3.24	3.2e-07	599.751	2	89917	0.78	TMAG	GAADCSFWER	Carbamidomethyl@5		Q20170801-09	125.003	107	1.1e-05	1	263	28480.5	HUMAN	Proteasome subunit beta type-5
[161]		P28074	PSB5_HUMAN	4	11	3.24	3.2e-07	433.752	2	983064	-0.48	MLHG	TTTLAFK		Abu@N-term	Q20170801-09	92.8196	60	0.0026	2	263	28480.5	HUMAN	Proteasome subunit beta type-5
[162]		Q14008	CKAP5_HUMAN	5	2.7	3.64	1.4e-08	581.819	2	157478	-0.58	VAGK	TTGEVVSGVVSK			Q20170801-09	83.2422	85	1.4e-08	1	2032	225497	HUMAN	Cytoskeleton-associated protein 5
[162]		Q14008	CKAP5_HUMAN	5	2.7	3.64	1.4e-08	775.42	2	82970	0.24	LLPR	TEISDKITSELVSK			Q20170801-09	148.21	855	3.9e-05	1	2032	225497	HUMAN	Cytoskeleton-associated protein 5
[162]		Q14008	CKAP5_HUMAN	5	2.7	3.64	1.4e-08	493.277	2	138628	-4.1	RTLK	TLLHTLCK	Carbamidomethyl@7		Q20170801-09	85.5201	1762	6.2e-05	1	2032	225497	HUMAN	Cytoskeleton-associated protein 5
[162]		Q14008	CKAP5_HUMAN	5	2.7	3.64	1.4e-08	530.301	2	65914	-3.5	LAAK	CLTGLAVGLR	Carbamidomethyl@1		Q20170801-09	153.063	343	0.00031	1	2032	225497	HUMAN	Cytoskeleton-associated protein 5
[162]		Q14008	CKAP5_HUMAN	5	2.7	3.64	1.4e-08	569.287	2	45777	1.6	ALLK	HINDSAPEVR			Q20170801-09	46.84	447	0.0015	1	2032	225497	HUMAN	Cytoskeleton-associated protein 5
[163]		P27824	CALX_HUMAN	4	6.8	3.65	9.2e-09	658.815	4	184128	-0.81	ANPR	CESAPGCGVWQRPVIDNPNYKGK	Carbamidomethyl@1;Carbamidomethyl@7		Q20170801-07	135.68	360	9.2e-09	1	592	67568.9	HUMAN	Calnexin
[163]		P27824	CALX_HUMAN	4	6.8	3.65	9.2e-09	816.379	3	47928	0.11	ANPR	CESAPGCGVWQRPVIDNPNYK	Carbamidomethyl@1;Carbamidomethyl@7		Q20170801-09	149.084	360	1e-07	1	592	67568.9	HUMAN	Calnexin
[163]		P27824	CALX_HUMAN	4	6.8	3.65	9.2e-09	531.304	2	1280000	1.5	SFDR	GTLSGWILSK			Q20170801-09	170.571	78	4.7e-05	1	592	67568.9	HUMAN	Calnexin
[163]		P27824	CALX_HUMAN	4	6.8	3.65	9.2e-09	420.211	2	354786	0.91	KNPK	TGIYEEK			Q20170801-09	36.108	211	0.00051	1	592	67568.9	HUMAN	Calnexin
[164]		P60842	IF4A1_HUMAN	4	10.6	4.4	1.3e-09	609.984	3	752907	-0.63	SLLR	GIYAYGFEKPSAIQQR			Q20170801-09	145.43	46	1.3e-09	3	406	46154.4	HUMAN	Eukaryotic initiation factor 4A-I
[164]		P60842	IF4A1_HUMAN	4	10.6	4.4	1.3e-09	530.616	3	343661	0.63	RFGR	KGVAINMVTEEDKR			Q20170801-09	92.0365	369	1.2e-06	1	406	46154.4	HUMAN	Eukaryotic initiation factor 4A-I
[164]		P60842	IF4A1_HUMAN	4	10.6	4.4	1.3e-09	513.928	3	357912	0.49	QKER	DVIMREFRSGSSR			Q20170801-09	101.479	312	0.00099	2	406	46154.4	HUMAN	Eukaryotic initiation factor 4A-I
[164]		P60842	IF4A1_HUMAN	4	10.6	4.4	1.3e-09	355.855	3	369541	-0.5	QKER	DVIMREFR			Q20170801-09	114.955	312	0.0043	2	406	46154.4	HUMAN	Eukaryotic initiation factor 4A-I
[164-1]	1	P38919	IF4A3_HUMAN	2	7.3	4.4	1.3e-09	609.984	3	752907	-0.63	DLLR	GIYAYGFEKPSAIQQR			Q20170801-09	145.43	52	1.3e-09	3	411	46871.5	HUMAN	Eukaryotic initiation factor 4A-III
[164-1]	1	P38919	IF4A3_HUMAN	2	7.3	4.4	1.3e-09	634.301	2	35166	0.16	-	MATTATMATSGSAR		Met-loss+Acetyl@1	Q20170801-09	85.4432	1	1.6e-07	1	411	46871.5	HUMAN	Eukaryotic initiation factor 4A-III
[165]		P61160	ARP2_HUMAN	2	6.6	5.13	1.2e-10	696.83	2	248379	-3.5	DDMK	HLWDYTFGPEK			Q20170801-09	165.543	87	1.2e-10	1	394	44761.2	HUMAN	Actin-related protein 2
[165]		P61160	ARP2_HUMAN	2	6.6	5.13	1.2e-10	876.423	2	134838	-3.6	SELR	SMLEVNYPMENGIVR			Q20170801-09	180.082	66	9e-09	1	394	44761.2	HUMAN	Actin-related protein 2
[166]		Q9UPN3	MACF1_HUMAN	3	0.5	3.5	4.7e-07	576.271	2	125891	-1.9	LQAK	TGSLEEMTQR			Q20170801-09	82.9248	5007	4.7e-07	1	7388	838315	HUMAN	Microtubule-actin cross-linking factor 1, isoforms 1/2/3/5
[166]		Q9UPN3	MACF1_HUMAN	3	0.5	3.5	4.7e-07	516.952	3	513835	2.2	EFQK	TLGGKQPVYDTTIR			Q20170801-09	104.252	6600	6.5e-06	1	7388	838315	HUMAN	Microtubule-actin cross-linking factor 1, isoforms 1/2/3/5
[166]		Q9UPN3	MACF1_HUMAN	3	0.5	3.5	4.7e-07	616.828	2	189079	0.48	HQGR	TTQQDLSALQK			Q20170801-09	86.2612	3644	8.5e-06	1	7388	838315	HUMAN	Microtubule-actin cross-linking factor 1, isoforms 1/2/3/5
[167]		P62263	RS14_HUMAN	2	15.9	5.78	2.3e-10	527.786	2	509503	-0.079	NRTK	TPGPGAQSALR			Q20170801-09	60.2705	107	2.3e-10	1	151	16272.9	HUMAN	40S ribosomal protein S14
[167]		P62263	RS14_HUMAN	2	15.9	5.78	2.3e-10	715.36	2	81037	-2.7	KIGR	IEDVTPIPSDSTR			Q20170801-09	117.166	129	6.7e-06	1	151	16272.9	HUMAN	40S ribosomal protein S14
[168]		P42285	SK2L2_HUMAN	4	3.2	3.35	8.4e-08	464.904	3	242171	-0.5	KKAR	TVLQMDELKCR	Carbamidomethyl@10		Q20170801-09	120.135	844	8.4e-08	1	1042	117806	HUMAN	Superkiller viralicidic activity 2-like 2
[168]		P42285	SK2L2_HUMAN	4	3.2	3.35	8.4e-08	425.868	3	506194	0.095	MLEK	SFYQFQHYR			Q20170801-09	118.27	588	9.5e-07	1	1042	117806	HUMAN	Superkiller viralicidic activity 2-like 2
[168]		P42285	SK2L2_HUMAN	4	3.2	3.35	8.4e-08	538.787	2	582691	0.37	KKAR	TVLQMDELK			Q20170801-09	134.737	844	6e-06	1	1042	117806	HUMAN	Superkiller viralicidic activity 2-like 2
[168]		P42285	SK2L2_HUMAN	4	3.2	3.35	8.4e-08	745.383	2	798740	1.3	IEES	ITEDLSLADLMPR		Oxidation@11	Q20170801-09	172.9	86	0.014	1	1042	117806	HUMAN	Superkiller viralicidic activity 2-like 2
[169]		Q9NR28	DBLOH_HUMAN	2	8.4	6.45	2.4e-11	746.063	3	104535	0.098	VTLC	AVPIAQKSEPHSLSSEALMR		Abu@N-term	Q20170801-09	136.706	56	2.4e-11	1	239	27131	HUMAN	Diablo homolog, mitochondrial
[169]		Q9NR28	DBLOH_HUMAN	2	8.4	6.45	2.4e-11	406.255	2	363430	-0.72	VTLC	AVPIAQK		Abu@N-term	Q20170801-09	59.3464	56	0.00078	1	239	27131	HUMAN	Diablo homolog, mitochondrial
[170]		P51149	RAB7A_HUMAN	2	5.3	4.86	4e-09	663.348	2	124356	0.68	GVGK	TSLMNQYVNKK			Q20170801-09	86.5066	22	4e-09	1	207	23490	HUMAN	Ras-related protein Rab-7a
[170]		P51149	RAB7A_HUMAN	2	5.3	4.86	4e-09	599.298	2	100	-3.1	GVGK	TSLMNQYVNK			Q20170801-09	107.414	22	1.7e-07	1	207	23490	HUMAN	Ras-related protein Rab-7a
[171]		P30519	HMOX2_HUMAN	2	4.1	5.08	1.7e-09	634.322	2	256547	0.49	AYTR	YMGDLSGGQVLK			Q20170801-07	136.543	157	1.7e-09	1	316	36033.2	HUMAN	Heme oxygenase 2
[171]		P30519	HMOX2_HUMAN	2	4.1	5.08	1.7e-09	465.916	3	533008	1.9	AYTR	YMGDLSGGQVLKK			Q20170801-07	113.343	157	4.6e-07	1	316	36033.2	HUMAN	Heme oxygenase 2
[172]		P24928	RPB1_HUMAN	2	1.7	5.64	7.4e-10	961.021	2	107375	-2	FSAR	TVITPDPNLSIDQVGVPR			Q20170801-09	180.116	365	7.4e-10	1	1970	217178	HUMAN	DNA-directed RNA polymerase II subunit RPB1
[172]		P24928	RPB1_HUMAN	2	1.7	5.64	7.4e-10	560.924	3	135814	-0.073	-	MHGGGPPSGDSACPLR	Carbamidomethyl@13	Abu@N-term	Q20170801-07	77.6273	1	3.9e-08	1	1970	217178	HUMAN	DNA-directed RNA polymerase II subunit RPB1
[173]		O75643	U520_HUMAN	3	1.3	4.36	8.4e-08	611.314	2	804384	-1	YDKK	TGNFQVTELGR			Q20170801-09	126.56	976	8.4e-08	1	2136	244510	HUMAN	U5 small nuclear ribonucleoprotein 200 kDa helicase
[173]		O75643	U520_HUMAN	3	1.3	4.36	8.4e-08	387.531	3	123882	-1.2	LHIQ	GFNISHTQTR			Q20170801-07	58.7712	1529	8.8e-07	1	2136	244510	HUMAN	U5 small nuclear ribonucleoprotein 200 kDa helicase
[173]		O75643	U520_HUMAN	3	1.3	4.36	8.4e-08	440.747	2	121557	-2.9	GGER	TYTQLVR			Q20170801-07	79.5161	604	0.0027	1	2136	244510	HUMAN	U5 small nuclear ribonucleoprotein 200 kDa helicase
[174]		Q9H0U6	RM18_HUMAN	1	16.7	8.77	1.3e-15	831.658	4	516295	-0.71	FAAL	STSSEPAAKPEVDPVENEAVAPEFTNRNPR		Abu@N-term	Q20170801-07	143.969	25	1.3e-15	1	180	20576.7	HUMAN	39S ribosomal protein L18, mitochondrial
[175]		Q9UK76	JUPI1_HUMAN	2	14.9	5.44	1e-10	701.833	2	100348	-0.86	SNIF	GTPEENQASWAK		Abu@N-term	Q20170801-09	82.0396	53	1e-10	1	154	16014.6	HUMAN	Jupiter microtubule associated homolog 1
[175]		Q9UK76	JUPI1_HUMAN	2	14.9	5.44	1e-10	477.581	3	508753	-0.0013	FSLG	FDEPTEQPVRK		Abu@N-term	Q20170801-09	74.3168	34	8.9e-07	1	154	16014.6	HUMAN	Jupiter microtubule associated homolog 1
[176]		P04843	RPN1_HUMAN	3	5.3	3.84	2.4e-07	518.943	3	618665	0.61	PGSA	SSEAPPLINEDVKR			Q20170801-09	104.286	25	2.4e-07	1	607	68570	HUMAN	Dolichyl-diphosphooligosaccharide--protein glycosyltransferase subunit 1
[176]		P04843	RPN1_HUMAN	3	5.3	3.84	2.4e-07	509.241	2	144693	-0.5	GLYR	HFDETVNR			Q20170801-09	36.9682	495	1.1e-06	1	607	68570	HUMAN	Dolichyl-diphosphooligosaccharide--protein glycosyltransferase subunit 1
[176]		P04843	RPN1_HUMAN	3	5.3	3.84	2.4e-07	357.532	3	224384	-1.6	DVKR	TVDLSSHLAK			Q20170801-07	81.2731	39	8e-06	1	607	68570	HUMAN	Dolichyl-diphosphooligosaccharide--protein glycosyltransferase subunit 1
[177]		P14174	MIF_HUMAN	2	10.4	5.87	2.9e-10	644.347	2	2090000	-0.65	-	MPMFIVNTNVPR		Met-loss@1	Q20170801-09	160.82	1	2.9e-10	1	115	12476.4	HUMAN	Macrophage migration inhibitory factor
[177]		P14174	MIF_HUMAN	2	10.4	5.87	2.9e-10	652.347	2	78746	2.6	-	MPMFIVNTNVPR		Met-loss@1;Oxidation@3	Q20170801-07	144.232	1	8.8e-05	1	115	12476.4	HUMAN	Macrophage migration inhibitory factor
[178]		P50402	EMD_HUMAN	1	4.7	8.72	1.5e-15	625.785	2	464582	-1	FTTR	TYGEPESAGPSR			Q20170801-07	54.8656	104	1.5e-15	1	254	28994.1	HUMAN	Emerin
[179]		Q9BX68	HINT2_HUMAN	2	17.2	4.57	4.8e-09	924.141	3	175264	-1	QVRG	AAGVTDGNEVAKAQQATPGGAAPTIFSR		Abu@N-term	Q20170801-09	155.125	31	4.8e-09	1	163	17161.9	HUMAN	Histidine triad nucleotide-binding protein 2, mitochondrial
[179]		Q9BX68	HINT2_HUMAN	2	17.2	4.57	4.8e-09	608.812	2	266753	-0.82	QVRG	AAGVTDGNEVAK		Abu@N-term	Q20170801-07	51.6311	31	5.7e-08	1	163	17161.9	HUMAN	Histidine triad nucleotide-binding protein 2, mitochondrial
[180]		P20340	RAB6A_HUMAN	2	10.1	5.34	1.1e-10	723.356	2	152466	-0.37	LFRR	VAAALPGMESTQDR			Q20170801-09	119.485	170	1.1e-10	1	208	23593	HUMAN	Ras-related protein Rab-6A
[180]		P20340	RAB6A_HUMAN	2	10.1	5.34	1.1e-10	464.216	2	204911	1.7	FLSK	TMYLEDR			Q20170801-09	79.0209	54	7e-07	2	208	23593	HUMAN	Ras-related protein Rab-6A
[181]		Q14566	MCM6_HUMAN	2	2.9	5.67	1.5e-11	843.436	2	142222	2.8	LNAR	TSILAAANPISGHYDR			Q20170801-09	151.299	497	1.5e-11	1	821	92890.1	HUMAN	DNA replication licensing factor MCM6
[181]		Q14566	MCM6_HUMAN	2	2.9	5.67	1.5e-11	500.746	2	75875	0.056	QFLK	HVEEFSPR			Q20170801-09	48.2296	408	1.6e-06	1	821	92890.1	HUMAN	DNA replication licensing factor MCM6
[182]		P06748	NPM_HUMAN	3	8.5	4.13	1.8e-07	442.588	3	436276	-2.5	SGKR	SAPGGGSKVPQKK		Abu@N-term	Q20170801-09	16.4913	143	1.8e-07	1	294	32575.3	HUMAN	Nucleophosmin
[182]		P06748	NPM_HUMAN	3	8.5	4.13	1.8e-07	471.931	3	109251	-0.98	PVKK	SIRDTPAKNAQK		Abu@N-term	Q20170801-09	27.9308	195	6.2e-06	1	294	32575.3	HUMAN	Nucleophosmin
[182]		P06748	NPM_HUMAN	3	8.5	4.13	1.8e-07	541.819	2	21422	-0.87	KRSA	PGGGSKVPQKK			Q20170801-07	19.9358	145	0.00081	1	294	32575.3	HUMAN	Nucleophosmin
[183]		P37802	TAGL2_HUMAN	4	24.6	2.58	3e-07	692.31	2	41635	-0.91	GTNR	GASQAGMTGYGMPR			Q20170801-07	106.838	183	3e-07	2	199	22391.7	HUMAN	Transgelin-2
[183]		P37802	TAGL2_HUMAN	4	24.6	2.58	3e-07	602.315	2	197146	0.19	-	MANRGPAYGLSR		Met-loss+Acetyl@1	Q20170801-09	87.6832	1	8.8e-07	1	199	22391.7	HUMAN	Transgelin-2
[183]		P37802	TAGL2_HUMAN	4	24.6	2.58	3e-07	608.347	2	601352	-0.43	CVQR	TLMNLGGLAVAR			Q20170801-09	174.59	128	4.8e-06	1	199	22391.7	HUMAN	Transgelin-2
[183]		P37802	TAGL2_HUMAN	4	24.6	2.58	3e-07	601.818	2	84279	-1.8	QEGK	NVIGLQMGTNR			Q20170801-09	126.922	172	5.3e-05	1	199	22391.7	HUMAN	Transgelin-2
[184]		Q9NYU2	UGGG1_HUMAN	2	1.7	5.38	8e-10	692.352	2	172845	1.9	SQGK	TAAVANSMNYLTK			Q20170801-09	129.795	732	8e-10	1	1555	177191	HUMAN	UDP-glucose:glycoprotein glucosyltransferase 1
[184]		Q9NYU2	UGGG1_HUMAN	2	1.7	5.38	8e-10	554.273	3	269059	-0.17	KRAK	TIDLCNNPMTKEPK	Carbamidomethyl@5		Q20170801-09	121.54	1489	1e-05	1	1555	177191	HUMAN	UDP-glucose:glycoprotein glucosyltransferase 1
[185]		P63104	1433Z_HUMAN	2	9	6.62	1.2e-11	774.859	2	283490	-1.5	ACMK	SVTEQGAELSNEER			Q20170801-09	79.3387	28	1.2e-11	1	245	27745.3	HUMAN	14-3-3 protein zeta/delta
[185]		P63104	1433Z_HUMAN	2	9	6.62	1.2e-11	454.268	2	271480	3.7	NEER	NLLSVAYK			Q20170801-09	132.527	42	0.0068	7	245	27745.3	HUMAN	14-3-3 protein zeta/delta
[185-1]	1	P62258	1433E_HUMAN	2	7.8	2.45	3.8e-06	762.854	2	186305	0.12	-	MDDREDLVYQAK		Acetyl@N-term	Q20170801-09	137.129	1	3.8e-06	1	255	29174.2	HUMAN	14-3-3 protein epsilon
[185-1]	1	P62258	1433E_HUMAN	2	7.8	2.45	3.8e-06	454.268	2	271480	3.7	VEER	NLLSVAYK			Q20170801-09	132.527	43	0.0068	7	255	29174.2	HUMAN	14-3-3 protein epsilon
[185-2]	1	P61981	1433G_HUMAN	2	7.3	0.73	0.0011	665.86	2	296619	-0.91	-	MVDREQLVQK		Abu@N-term	Q20170801-09	79.7866	1	0.0011	1	247	28302.8	HUMAN	14-3-3 protein gamma
[185-2]	1	P61981	1433G_HUMAN	2	7.3	0.73	0.0011	454.268	2	271480	3.7	NEER	NLLSVAYK			Q20170801-09	132.527	43	0.0068	7	247	28302.8	HUMAN	14-3-3 protein gamma
[186]		P62942	FKB1A_HUMAN	2	13	4.44	3.6e-09	657.836	2	38862	-0.38	-	MGVQVETISPGDGR		Met-loss@1	Q20170801-07	100.68	1	3.6e-09	1	108	11950.8	HUMAN	Peptidyl-prolyl cis-trans isomerase FKBP1A
[186]		P62942	FKB1A_HUMAN	2	13	4.44	3.6e-09	700.36	2	49300	-3.3	-M	GVQVETISPGDGR		Abu@N-term	Q20170801-09	112.758	2	7.2e-08	1	108	11950.8	HUMAN	Peptidyl-prolyl cis-trans isomerase FKBP1A
[187]		Q9BSJ8	ESYT1_HUMAN	3	2.5	4.82	1.8e-10	546.77	2	547542	0.32	QKKR	TLSPEFNER			Q20170801-09	95.3134	1032	1.8e-10	1	1104	122858	HUMAN	Extended synaptotagmin-1
[187]		Q9BSJ8	ESYT1_HUMAN	3	2.5	4.82	1.8e-10	458.203	2	42225	-0.18	VSVK	SNSSFMSR			Q20170801-07	48.1312	1061	4.7e-06	1	1104	122858	HUMAN	Extended synaptotagmin-1
[187]		Q9BSJ8	ESYT1_HUMAN	3	2.5	4.82	1.8e-10	441.238	3	172958	1.8	RSFR	SHVVREDLNPR			Q20170801-09	52.1165	689	0.00016	1	1104	122858	HUMAN	Extended synaptotagmin-1
[188]		P18615	NELFE_HUMAN	2	9.5	5.52	2.9e-11	996.482	2	81307	-1.1	GVKR	SLSEQPVMDTATATEQAK		Abu@N-term	Q20170801-09	138.115	49	2.9e-11	1	380	43240.1	HUMAN	Negative elongation factor E
[188]		P18615	NELFE_HUMAN	2	9.5	5.52	2.9e-11	699.381	3	206911	-1.5	-	MLVIPPGLSEEEEALQKK		Abu@N-term	Q20170801-09	186.224	1	1.8e-06	1	380	43240.1	HUMAN	Negative elongation factor E
[189]		Q16630	CPSF6_HUMAN	1	2.5	8.41	5.8e-15	833.391	2	105641	-1.9	DTAR	TPLSEAEFEEIMNR			Q20170801-09	184.795	407	5.8e-15	1	551	59210.3	HUMAN	Cleavage and polyadenylation specificity factor subunit 6
[190]		P17844	DDX5_HUMAN	4	5.9	3.87	7.3e-09	787.897	2	138427	1.4	RSTK	TGTAYTFFTPNNIK			Q20170801-09	170.214	438	7.3e-09	1	614	69148.7	HUMAN	Probable ATP-dependent RNA helicase DDX5
[190]		P17844	DDX5_HUMAN	4	5.9	3.87	7.3e-09	442.225	2	698254	0.044	AGKR	GGFNTFR		Abu@N-term	Q20170801-07	96.2425	503	1.5e-06	1	614	69148.7	HUMAN	Probable ATP-dependent RNA helicase DDX5
[190]		P17844	DDX5_HUMAN	4	5.9	3.87	7.3e-09	458.717	4	1360000	0.35	AGKR	GGFNTFRDRENYDR		Abu@N-term	Q20170801-07	101.846	503	4.6e-06	1	614	69148.7	HUMAN	Probable ATP-dependent RNA helicase DDX5
[190]		P17844	DDX5_HUMAN	4	5.9	3.87	7.3e-09	468.774	2	258169	0.24	KENK	TIVFVETK			Q20170801-09	115.309	344	0.012	3	614	69148.7	HUMAN	Probable ATP-dependent RNA helicase DDX5
[191]		P23526	SAHH_HUMAN	2	4.9	4.44	2.7e-09	630.296	2	51214	1.4	SVTK	SKFDNLYGCR	Carbamidomethyl@9		Q20170801-09	91.7687	187	2.7e-09	1	432	47716.5	HUMAN	Adenosylhomocysteinase
[191]		P23526	SAHH_HUMAN	2	4.9	4.44	2.7e-09	393.227	3	251801	-2.2	MRER	YSASKPLKGAR			Q20170801-09	26.0797	39	3.7e-08	1	432	47716.5	HUMAN	Adenosylhomocysteinase
[192]		Q9UII2	ATIF1_HUMAN	2	15.1	5.81	7.1e-11	578.279	3	961415	0.12	ARGF	GSDQSENVDRGAGSIR		Abu@N-term	Q20170801-09	59.5606	26	7.1e-11	1	106	12248.9	HUMAN	ATPase inhibitor, mitochondrial
[192]		Q9UII2	ATIF1_HUMAN	2	15.1	5.81	7.1e-11	549.928	3	180487	0.42	ARGF	GSDQSENVDRGAGSIR			Q20170801-07	54.5755	26	0.00065	1	106	12248.9	HUMAN	ATPase inhibitor, mitochondrial
[193]		Q13838	DX39B_HUMAN	2	4.2	5.72	9.9e-11	588.772	2	401695	0.47	KHIK	HFILDECDK	Carbamidomethyl@7		Q20170801-09	101.464	192	9.9e-11	1	428	48991.8	HUMAN	Spliceosome RNA helicase DDX39B
[193]		Q13838	DX39B_HUMAN	2	4.2	5.72	9.9e-11	420.544	3	392156	0.3	RLSR	YQQFKDFQR			Q20170801-09	88.1577	330	0.00011	2	428	48991.8	HUMAN	Spliceosome RNA helicase DDX39B
[193-1]	1	O00148	DX39A_HUMAN	2	4.2	6.07	4.6e-14	581.763	2	83189	-0.53	KNVK	HFVLDECDK	Carbamidomethyl@7		Q20170801-09	84.7523	191	4.6e-14	1	427	49130	HUMAN	ATP-dependent RNA helicase DDX39A
[193-1]	1	O00148	DX39A_HUMAN	2	4.2	6.07	4.6e-14	420.544	3	392156	0.3	RLSR	YQQFKDFQR			Q20170801-09	88.1577	329	0.00011	2	427	49130	HUMAN	ATP-dependent RNA helicase DDX39A
[194]		P52597	HNRPF_HUMAN	2	5.1	5.04	1e-08	702.863	2	423054	-0.19	-M	MLGPEGGEGFVVK		Abu@N-term	Q20170801-09	160.317	2	1e-08	1	415	45672.3	HUMAN	Heterogeneous nuclear ribonucleoprotein F
[194]		P52597	HNRPF_HUMAN	2	5.1	5.04	1e-08	511.256	2	190708	1.8	KSHR	TEMDWVLK			Q20170801-09	159.326	91	5.1e-05	1	415	45672.3	HUMAN	Heterogeneous nuclear ribonucleoprotein F
[195]		Q96N67	DOCK7_HUMAN	2	1.3	5.66	2.2e-11	632.645	3	225791	1.6	RDCR	TLVSAVPEESEMDPHVR			Q20170801-09	146.96	98	2.2e-11	1	2140	242563	HUMAN	Dedicator of cytokinesis protein 7
[195]		Q96N67	DOCK7_HUMAN	2	1.3	5.66	2.2e-11	676.845	2	93501	-1.5	DCIR	SYTEDWAIVIR			Q20170801-09	182.705	119	2.3e-05	1	2140	242563	HUMAN	Dedicator of cytokinesis protein 7
[196]		O14828	SCAM3_HUMAN	1	5.2	8.05	2.7e-14	822.907	2	497553	-1.3	PAVR	TAAANAAAGAAENAFRAP			Q20170801-09	150.321	330	2.7e-14	1	347	38287.3	HUMAN	Secretory carrier-associated membrane protein 3
[197]		P30520	PURA2_HUMAN	2	4.8	4.79	1e-08	496.774	2	123466	0.4	TTKK	GIGPVYSSK		Abu@N-term	Q20170801-07	89.4515	165	1e-08	1	456	50097.8	HUMAN	Adenylosuccinate synthetase isozyme 2
[197]		P30520	PURA2_HUMAN	2	4.8	4.79	1e-08	722.863	2	316660	0.56	VQYK	TLPGWNTDISNAR			Q20170801-09	151.432	404	2.8e-08	1	456	50097.8	HUMAN	Adenylosuccinate synthetase isozyme 2
[198]		Q9NZI8	IF2B1_HUMAN	3	7.6	3.85	1.1e-07	927.009	2	73200	-1.6	KGGK	TVNELQNLTAAEVVVPR			Q20170801-09	184.141	509	1.1e-07	1	577	63481.1	HUMAN	Insulin-like growth factor 2 mRNA-binding protein 1
[198]		Q9NZI8	IF2B1_HUMAN	3	7.6	3.85	1.1e-07	736.448	2	120867	0.85	IPLR	LLVPTQYVGAIIGK			Q20170801-09	196.046	200	2.1e-06	1	577	63481.1	HUMAN	Insulin-like growth factor 2 mRNA-binding protein 1
[198]		Q9NZI8	IF2B1_HUMAN	3	7.6	3.85	1.1e-07	750.862	2	38288	-0.75	VVPR	DQTPDENDQVIVK			Q20170801-09	92.2153	526	0.019	1	577	63481.1	HUMAN	Insulin-like growth factor 2 mRNA-binding protein 1
[199]		Q14257	RCN2_HUMAN	2	4.4	5.05	5.7e-09	528.611	3	1060000	0.83	AAGA	GKAEELHYPLGER		Abu@N-term	Q20170801-09	96.3923	23	5.7e-09	1	317	36876.7	HUMAN	Reticulocalbin-2
[199]		Q14257	RCN2_HUMAN	2	4.4	5.05	5.7e-09	435.735	4	459955	0.29	AAGA	GKAEELHYPLGERR		Abu@N-term	Q20170801-09	83.2265	23	4.7e-05	1	317	36876.7	HUMAN	Reticulocalbin-2
[200]		P29692	EF1D_HUMAN	2	13.2	5.47	5.5e-10	729.021	3	89813	0.21	NIQK	SLAGSSGPGASSGTSGDHGELVVR			Q20170801-07	108.353	60	5.5e-10	1	281	31122.1	HUMAN	Elongation factor 1-delta
[200]		P29692	EF1D_HUMAN	2	13.2	5.47	5.5e-10	687.375	2	100394	1	ACVR	SIQLDGLVWGASK			Q20170801-09	185.611	220	7.2e-06	1	281	31122.1	HUMAN	Elongation factor 1-delta
[201]		P35908	K22E_HUMAN	2	5.3	4.45	1.7e-10	440.866	3	155011	-0.34	CLSR	HGGGGGGFGGGGFGSR			Q20170801-07	68.1465	46	1.7e-10	1	639	65433.4	HUMAN	Keratin, type II cytoskeletal 2 epidermal
[201]		P35908	K22E_HUMAN	2	5.3	4.45	1.7e-10	679.337	3	221278	0.29	NVIL	SMDNSRNLDLDSIIAEVK		Oxidation@2	Q20170801-09	186.666	336	8.1e-09	1	639	65433.4	HUMAN	Keratin, type II cytoskeletal 2 epidermal
[202]		Q15369	ELOC_HUMAN	1	12.5	7.92	5.4e-15	774.328	2	243869	-0.95	GEEK	TYGGCEGPDAMYVK	Carbamidomethyl@5		Q20170801-09	116.514	7	5.4e-15	1	112	12473.3	HUMAN	Elongin-C
[203]		Q9BWD1	THIC_HUMAN	2	5.5	6.04	7e-11	496.939	3	301604	-2.5	STRK	GLIEVKTDEFPR		Abu@N-term	Q20170801-09	153.948	212	7e-11	1	397	41351.2	HUMAN	Acetyl-CoA acetyltransferase, cytosolic
[203]		Q9BWD1	THIC_HUMAN	2	5.5	6.04	7e-11	606.954	3	129856	1.5	IEVK	TDEFPRHGSNIEAMSK			Q20170801-09	90.8277	218	0.0042	1	397	41351.2	HUMAN	Acetyl-CoA acetyltransferase, cytosolic
[204]		P35613	BASI_HUMAN	3	10.1	4.25	4e-09	602.278	3	303033	-1	KAVK	SSEHINEGETAMLVCK	Carbamidomethyl@15		Q20170801-09	114.492	228	4e-09	1	385	42200.7	HUMAN	Basigin
[204]		P35613	BASI_HUMAN	3	10.1	4.25	4e-09	507.754	2	248984	0.28	SESR	FFVSSSQGR			Q20170801-09	82.2908	274	7e-07	1	385	42200.7	HUMAN	Basigin
[204]		P35613	BASI_HUMAN	3	10.1	4.25	4e-09	832.899	2	68098	-2.6	LVCK	SESVPPVTDWAWYK			Q20170801-07	188.005	244	0.00019	1	385	42200.7	HUMAN	Basigin
[205]		O14497	ARI1A_HUMAN	1	0.6	7.84	2.2e-14	702.319	2	166999	0.68	PLAR	TPQPSSPMDQMGK			Q20170801-09	92.6765	377	2.2e-14	1	2285	242047	HUMAN	AT-rich interactive domain-containing protein 1A
[206]		P20674	COX5A_HUMAN	2	9.3	4.86	1.1e-09	564.908	3	1130000	-0.64	VRCY	SHGSQETDEEFDAR		Abu@N-term	Q20170801-09	54.1554	42	1.1e-09	1	150	16762.3	HUMAN	Cytochrome c oxidase subunit 5A, mitochondrial
[206]		P20674	COX5A_HUMAN	2	9.3	4.86	1.1e-09	536.557	3	140400	-0.91	VRCY	SHGSQETDEEFDAR			Q20170801-07	52.7881	42	2.4e-06	1	150	16762.3	HUMAN	Cytochrome c oxidase subunit 5A, mitochondrial
[207]		Q9NX58	LYAR_HUMAN	1	3.7	7.77	3.7e-15	577.945	3	735387	0.9	-M	VFFTCNACGESVKK	Carbamidomethyl@5;Carbamidomethyl@8	Abu@N-term	Q20170801-09	117.291	2	3.7e-15	1	379	43615.2	HUMAN	Cell growth-regulating nucleolar protein
[208]		O95347	SMC2_HUMAN	2	2.8	5.05	1.4e-09	652.999	3	201412	2.4	IMTR	TVTLGGDVFDPHGTLSGGAR			Q20170801-09	164.565	649	1.4e-09	1	1197	135657	HUMAN	Structural maintenance of chromosomes protein 2
[208]		O95347	SMC2_HUMAN	2	2.8	5.05	1.4e-09	762.37	2	62972	3.4	NAER	HLFGQPNSAYDFK			Q20170801-09	140.47	946	3.1e-05	1	1197	135657	HUMAN	Structural maintenance of chromosomes protein 2
[209]		P78310	CXAR_HUMAN	1	3.6	7.72	1.1e-13	806.865	2	274733	-0.12	GYSK	TQYNQVPSEDFER			Q20170801-09	120.887	316	1.1e-13	1	365	40030.3	HUMAN	Coxsackievirus and adenovirus receptor
[210]		P05787	K2C8_HUMAN	3	6.6	3.08	4.2e-07	660.841	2	133981	2.3	DNSR	SLDMDSIIAEVK			Q20170801-07	190.33	253	4.2e-07	1	483	53704.7	HUMAN	Keratin, type II cytoskeletal 8
[210]		P05787	K2C8_HUMAN	3	6.6	3.08	4.2e-07	455.225	2	369352	-0.66	SSRS	YTSGPGSR		Abu@N-term	Q20170801-07	22.843	25	2.1e-06	1	483	53704.7	HUMAN	Keratin, type II cytoskeletal 8
[210]		P05787	K2C8_HUMAN	3	6.6	3.08	4.2e-07	494.262	3	207389	0.077	INKR	TEMENEFVLIKK			Q20170801-09	146.738	187	2.6e-05	1	483	53704.7	HUMAN	Keratin, type II cytoskeletal 8
[211]		Q9NP72	RAB18_HUMAN	3	16.5	3.26	3.2e-08	892.896	2	115363	1.2	ASAK	TCDGVQCAFEELVEK	Carbamidomethyl@2;Carbamidomethyl@7		Q20170801-07	188.397	154	3.2e-08	1	206	22977.3	HUMAN	Ras-related protein Rab-18
[211]		Q9NP72	RAB18_HUMAN	3	16.5	3.26	3.2e-08	500.759	2	422302	0.51	ERFR	TLTPSYYR			Q20170801-09	91.8781	72	6.3e-06	1	206	22977.3	HUMAN	Ras-related protein Rab-18
[211]		Q9NP72	RAB18_HUMAN	3	16.5	3.26	3.2e-08	630.323	2	207578	1.5	NKAK	LAIWDTAGQER			Q20170801-09	144.024	59	1.3e-05	2	206	22977.3	HUMAN	Ras-related protein Rab-18
[212]		Q13185	CBX3_HUMAN	2	12.6	5.37	4.3e-11	736.808	2	302243	-1	YEER	LTWHSCPEDEAQ	Carbamidomethyl@6		Q20170801-09	104.945	172	4.3e-11	1	183	20811.6	HUMAN	Chromobox protein homolog 3
[212]		Q13185	CBX3_HUMAN	2	12.6	5.37	4.3e-11	627.769	2	51609	-1.2	TKRK	SLSDSESDDSK		Abu@N-term	Q20170801-09	34.7539	93	3e-05	1	183	20811.6	HUMAN	Chromobox protein homolog 3
[213]		Q06830	PRDX1_HUMAN	2	9	3.8	4.6e-09	661.679	3	136043	2.5	DPKR	TIAQDYGVLKADEGISFR			Q20170801-07	176.027	111	4.6e-09	1	199	22110.5	HUMAN	Peroxiredoxin-1
[213]		Q06830	PRDX1_HUMAN	2	9	3.8	4.6e-09	554.306	2	628675	0.76	DPKR	TIAQDYGVLK			Q20170801-09	125.997	111	5.5e-08	1	199	22110.5	HUMAN	Peroxiredoxin-1
[214]		Q99757	THIOM_HUMAN	1	8.4	7.5	7.9e-15	827.379	2	310232	0.59	RISL	TTFNIQDGPDFQDR			Q20170801-09	155.728	60	7.9e-15	1	166	18383.5	HUMAN	Thioredoxin, mitochondrial
[215]		Q14152	EIF3A_HUMAN	2	2	5.13	3.4e-11	722.857	2	131971	-0.53	HTSR	TLSFGSDLNYATR			Q20170801-09	161.801	490	3.4e-11	1	1382	166571	HUMAN	Eukaryotic translation initiation factor 3 subunit A
[215]		Q14152	EIF3A_HUMAN	2	2	5.13	3.4e-11	398.219	4	213065	-0.67	-	MPAYFQRPENALKR		Met-loss@1	Q20170801-09	101.321	1	4.5e-06	1	1382	166571	HUMAN	Eukaryotic translation initiation factor 3 subunit A
[216]		O60749	SNX2_HUMAN	3	6	3.93	1.4e-09	544.975	3	318555	1.7	YLQR	TVKHPTLLQDPDLR			Q20170801-09	115.703	246	1.4e-09	1	519	58471.6	HUMAN	Sorting nexin-2
[216]		O60749	SNX2_HUMAN	3	6	3.93	1.4e-09	561.784	2	209468	-0.074	IESK	SMSAPVIFDR			Q20170801-09	149.504	117	1.1e-08	1	519	58471.6	HUMAN	Sorting nexin-2
[216]		O60749	SNX2_HUMAN	3	6	3.93	1.4e-09	368.207	2	209181	0.81	APEK	SIVGMTK			Q20170801-09	57.7849	212	0.018	1	519	58471.6	HUMAN	Sorting nexin-2
[217]		P36871	PGM1_HUMAN	2	4.8	4.72	8.1e-10	550.613	3	281549	-0.2	VTVK	TQAYQDQKPGTSGLR			Q20170801-09	61.4756	9	8.1e-10	1	562	61449.6	HUMAN	Phosphoglucomutase-1
[217]		P36871	PGM1_HUMAN	2	4.8	4.72	8.1e-10	719.348	2	100	-2.4	QISK	TIEEYAVCPDLK	Carbamidomethyl@8		Q20170801-09	147.435	153	4e-06	1	562	61449.6	HUMAN	Phosphoglucomutase-1
[218]		P62424	RL7A_HUMAN	2	11.3	5.08	2.9e-10	714.355	3	198720	-1.6	VHRK	TCTTVAFTQVNSEDKGALAK	Carbamidomethyl@2		Q20170801-09	129.117	198	2.9e-10	1	266	29995.9	HUMAN	60S ribosomal protein L7a
[218]		P62424	RL7A_HUMAN	2	11.3	5.08	2.9e-10	532.785	2	587786	0.042	EIRR	HWGGNVLGPK			Q20170801-09	93.6398	236	3.2e-05	1	266	29995.9	HUMAN	60S ribosomal protein L7a
[219]		Q9P2J5	SYLC_HUMAN	1	1.4	7.41	2.8e-13	962.462	2	125226	2.6	DWRR	SFITTDVNPYYDSFVR			Q20170801-09	192.045	204	2.8e-13	1	1176	134467	HUMAN	Leucine--tRNA ligase, cytoplasmic
[220]		P20290	BTF3_HUMAN	2	6.3	3.73	2.6e-07	446.225	3	984811	-0.6	QEPQ	MKETIMNQEK		Abu@N-term	Q20170801-07	63.1313	45	2.6e-07	1	206	22168.1	HUMAN	Transcription factor BTF3
[220]		P20290	BTF3_HUMAN	2	6.3	3.73	2.6e-07	412.975	4	206847	0.21	QEPQ	MKETIMNQEKLAK		Abu@N-term	Q20170801-07	92.5009	45	3.6e-07	1	206	22168.1	HUMAN	Transcription factor BTF3
[221]		O75439	MPPB_HUMAN	1	3.3	7.27	7.4e-13	899.986	2	264873	-0.61	NRLR	STQAATQVVLNVPETR		Abu@N-term	Q20170801-09	151.728	44	7.4e-13	1	489	54366.6	HUMAN	Mitochondrial-processing peptidase subunit beta
[222]		P99999	CYC_HUMAN	2	17.1	4.94	7.4e-10	390.212	3	696429	0.47	GKHK	TGPNLHGLFGR			Q20170801-09	140.547	29	7.4e-10	1	105	11748.8	HUMAN	Cytochrome c
[222]		P99999	CYC_HUMAN	2	17.1	4.94	7.4e-10	404.244	2	280176	0.96	PGTK	MIFVGIK			Q20170801-09	150.953	81	5.6e-05	1	105	11748.8	HUMAN	Cytochrome c
[223]		Q8NBS9	TXND5_HUMAN	1	4.6	7.24	5.4e-15	664.295	3	88262	-1.3	EAAA	AAADGPPAADGEDGQDPHSK		Abu@N-term	Q20170801-07	51.4341	44	5.4e-15	1	432	47629.3	HUMAN	Thioredoxin domain-containing protein 5
[224]		P40227	TCPZ_HUMAN	3	5.6	3.09	3.2e-06	596.287	2	211901	-1.1	EYEK	TEVNSGFFYK			Q20170801-09	133.354	242	3.2e-06	2	531	58024.7	HUMAN	T-complex protein 1 subunit zeta
[224]		P40227	TCPZ_HUMAN	3	5.6	3.09	3.2e-06	366.88	3	140979	-0.85	AAVK	TLNPKAEVAR			Q20170801-07	54.3977	6	1.4e-05	1	531	58024.7	HUMAN	T-complex protein 1 subunit zeta
[224]		P40227	TCPZ_HUMAN	3	5.6	3.09	3.2e-06	523.786	2	208413	-0.71	DVLR	TNLGPKGTMK			Q20170801-09	33.4257	36	5.7e-05	2	531	58024.7	HUMAN	T-complex protein 1 subunit zeta
[225]		Q9P2E9	RRBP1_HUMAN	1	1.3	7.18	1.1e-12	688.003	3	204190	0.39	EKLR	TAGPLESSETEEASQLKER			Q20170801-09	115.901	1334	1.1e-12	1	1410	152473	HUMAN	Ribosome-binding protein 1
[226]		Q9NSD9	SYFB_HUMAN	3	4.9	3.24	5.3e-08	705.375	2	201327	-0.013	TLPK	TYTIANQFPLNK			Q20170801-09	158.52	384	5.3e-08	1	589	66116.2	HUMAN	Phenylalanine--tRNA ligase beta subunit
[226]		Q9NSD9	SYFB_HUMAN	3	4.9	3.24	5.3e-08	478.313	2	335689	0.99	QVAR	TTLLPGLLK			Q20170801-09	172.671	452	2.1e-06	1	589	66116.2	HUMAN	Phenylalanine--tRNA ligase beta subunit
[226]		Q9NSD9	SYFB_HUMAN	3	4.9	3.24	5.3e-08	461.242	2	735826	-1.6	SNPK	TAEFQVAR			Q20170801-09	71.3875	444	7.4e-05	1	589	66116.2	HUMAN	Phenylalanine--tRNA ligase beta subunit
[227]		Q9BZL1	UBL5_HUMAN	3	17.8	4.51	1.1e-10	610.792	2	769016	-0.16	-	MIEVVCNDR	Carbamidomethyl@6	Abu@N-term	Q20170801-09	113.873	1	1.1e-10	1	73	8547	HUMAN	Ubiquitin-like protein 5
[227]		Q9BZL1	UBL5_HUMAN	3	17.8	4.51	1.1e-10	568.264	2	77181	-2.2	-	MIEVVCNDR	Carbamidomethyl@6		Q20170801-09	92.2675	1	1.7e-05	1	73	8547	HUMAN	Ubiquitin-like protein 5
[227]		Q9BZL1	UBL5_HUMAN	3	17.8	4.51	1.1e-10	549.63	3	247994	1.6	-	MIEVVCNDRLGKK	Carbamidomethyl@6	Abu@N-term	Q20170801-09	109.403	1	0.00053	1	73	8547	HUMAN	Ubiquitin-like protein 5
[228]		Q9UKV5	AMFR_HUMAN	1	2	7.08	8.1e-14	820.344	2	78564	-2.4	SCLR	SWLEQDTSCPTCR	Carbamidomethyl@9;Carbamidomethyl@12		Q20170801-09	122.175	367	8.1e-14	1	643	72996.4	HUMAN	E3 ubiquitin-protein ligase AMFR
[229]		Q9UNW1	MINP1_HUMAN	1	4.1	7.05	1.9e-12	750.398	3	513134	-0.26	LARC	SLLEPRDPVASSLSPYFGTK		Abu@N-term	Q20170801-09	186.875	31	1.9e-12	1	487	55051.7	HUMAN	Multiple inositol polyphosphate phosphatase 1
[230]		P07947	YES_HUMAN	2	4.1	4.11	3.2e-10	750.684	3	74304	1	EPVS	TSVSHYGAEPTTVSPCPSSSAK	Carbamidomethyl@16		Q20170801-07	96.7465	27	3.2e-10	1	543	60801.8	HUMAN	Tyrosine-protein kinase Yes
[230]		P07947	YES_HUMAN	2	4.1	4.11	3.2e-10	717.001	3	85922	0.43	PVST	SVSHYGAEPTTVSPCPSSSAK	Carbamidomethyl@15		Q20170801-07	91.5544	28	4.6e-08	1	543	60801.8	HUMAN	Tyrosine-protein kinase Yes
[231]		P38606	VATA_HUMAN	2	3.9	5.07	8.9e-09	758.401	2	128167	-0.31	IMKR	TALVANTSNMPVAAR			Q20170801-09	126.919	309	8.9e-09	1	617	68304.7	HUMAN	V-type proton ATPase catalytic subunit A
[231]		P38606	VATA_HUMAN	2	3.9	5.07	8.9e-09	481.779	2	278978	-0.79	GCGK	TVISQSLSK			Q20170801-09	72.948	257	0.0045	1	617	68304.7	HUMAN	V-type proton ATPase catalytic subunit A
[232]		Q8N1F7	NUP93_HUMAN	2	2.7	3.78	7.4e-09	414.185	3	498730	-0.074	SRKR	TFGMAEEYHR			Q20170801-09	93.0612	121	7.4e-09	1	819	93489.1	HUMAN	Nuclear pore complex protein Nup93
[232]		Q8N1F7	NUP93_HUMAN	2	2.7	3.78	7.4e-09	691.881	2	139106	3.4	SQAR	TLITFAGMIPYR			Q20170801-09	196.396	791	6.9e-08	1	819	93489.1	HUMAN	Nuclear pore complex protein Nup93
[233]		O00116	ADAS_HUMAN	1	1.8	7.02	2.2e-12	689.853	2	609141	-1.1	DETR	TIISLDTSQMNR			Q20170801-09	145.558	254	2.2e-12	1	658	72912.5	HUMAN	Alkyldihydroxyacetonephosphate synthase, peroxisomal
[234]		P54819	KAD2_HUMAN	2	5.9	4.23	4.6e-09	636.827	2	741268	-0.47	-MAP	SVPAAEPEYPK		Abu@N-term	Q20170801-09	105.408	4	4.6e-09	1	239	26478	HUMAN	Adenylate kinase 2, mitochondrial
[234]		P54819	KAD2_HUMAN	2	5.9	4.23	4.6e-09	799.929	2	111334	-1.2	-MAP	SVPAAEPEYPKGIR		Abu@N-term	Q20170801-09	118.303	4	2.3e-06	1	239	26478	HUMAN	Adenylate kinase 2, mitochondrial
[235]		P53396	ACLY_HUMAN	2	2	4.75	3.5e-08	746.365	2	291904	0.19	YVSR	SGGMSNELNNIISR			Q20170801-09	159.455	663	3.5e-08	1	1101	120840	HUMAN	ATP-citrate synthase
[235]		P53396	ACLY_HUMAN	2	2	4.75	3.5e-08	442.708	2	50419	-1.9	APSR	TASFSESR			Q20170801-09	28.8516	453	0.0015	1	1101	120840	HUMAN	ATP-citrate synthase
[236]		P49458	SRP09_HUMAN	1	14	7	5.4e-13	735.835	2	110383	-1.7	-	MPQYQTWEEFSR		Met-loss@1	Q20170801-07	152.583	1	5.4e-13	1	86	10111.8	HUMAN	Signal recognition particle 9 kDa protein
[237]		P08559	ODPA_HUMAN	2	2.8	3.75	3.4e-09	456.911	3	849967	1.3	ASRN	FANDATFEIKK		Abu@N-term	Q20170801-09	119.683	30	3.4e-09	1	390	43296.1	HUMAN	Pyruvate dehydrogenase E1 component subunit alpha, somatic form, mitochondrial
[237]		P08559	ODPA_HUMAN	2	2.8	3.75	3.4e-09	620.815	2	109031	1.1	ASRN	FANDATFEIK		Abu@N-term	Q20170801-07	149.533	30	1.1e-08	1	390	43296.1	HUMAN	Pyruvate dehydrogenase E1 component subunit alpha, somatic form, mitochondrial
[238]		P18206	VINC_HUMAN	4	3.1	2.59	3.9e-07	546.775	2	369394	0.88	ELSK	TISPMVMDAK			Q20170801-09	117.376	793	3.9e-07	1	1134	123800	HUMAN	Vinculin
[238]		P18206	VINC_HUMAN	4	3.1	2.59	3.9e-07	472.727	2	443155	0.41	GLQK	SFLDSGYR			Q20170801-09	114.933	816	1.2e-05	1	1134	123800	HUMAN	Vinculin
[238]		P18206	VINC_HUMAN	4	3.1	2.59	3.9e-07	566.793	2	337836	1.2	KRIR	TNLLQVCER	Carbamidomethyl@7		Q20170801-09	114.626	1047	6.8e-05	1	1134	123800	HUMAN	Vinculin
[238]		P18206	VINC_HUMAN	4	3.1	2.59	3.9e-07	440.73	2	365141	1.5	IKIR	TDAGFTLR			Q20170801-09	96.1182	1118	0.00018	1	1134	123800	HUMAN	Vinculin
[239]		P54577	SYYC_HUMAN	2	5.1	4.58	7.1e-08	682.041	3	734544	0.69	AEPR	TVVSGLVQFVPKEELQDR			Q20170801-09	182.145	401	7.1e-08	1	528	59144	HUMAN	Tyrosine--tRNA ligase, cytoplasmic
[239]		P54577	SYYC_HUMAN	2	5.1	4.58	7.1e-08	496.252	2	603605	1.1	LKVD	AQFGGIDQR			Q20170801-09	75.2021	181	0.0012	1	528	59144	HUMAN	Tyrosine--tRNA ligase, cytoplasmic
[240]		Q13685	AAMP_HUMAN	1	3	6.88	3.7e-13	733.319	2	106822	0.48	GDCK	TFQGPNCPATCGR	Carbamidomethyl@7;Carbamidomethyl@11		Q20170801-09	75.2693	210	3.7e-13	1	434	46751.3	HUMAN	Angio-associated migratory cell protein
[241]		P35658	NU214_HUMAN	3	2.2	2.99	1.7e-07	515.292	3	438124	1.3	STAK	TPHPVLTPVAANQAK			Q20170801-09	94.2081	1150	1.7e-07	1	2090	213621	HUMAN	Nuclear pore complex protein Nup214
[241]		P35658	NU214_HUMAN	3	2.2	2.99	1.7e-07	592.333	3	508183	0.4	PVVR	TPSIQPSLLPHAAPFAK			Q20170801-09	169.817	1021	2.7e-07	1	2090	213621	HUMAN	Nuclear pore complex protein Nup214
[241]		P35658	NU214_HUMAN	3	2.2	2.99	1.7e-07	525.919	3	171838	0.5	EDAR	TSCKDDEAVVQAPR	Carbamidomethyl@3		Q20170801-09	62.2037	1001	0.00078	1	2090	213621	HUMAN	Nuclear pore complex protein Nup214
[242]		O94979	SC31A_HUMAN	2	1.9	3.5	4.1e-08	843.899	2	98356	0.53	PGAK	TQPPEDISCIAWNR	Carbamidomethyl@9		Q20170801-09	160.759	165	4.1e-08	1	1220	133016	HUMAN	Protein transport protein Sec31A
[242]		O94979	SC31A_HUMAN	2	1.9	3.5	4.1e-08	561.793	2	825288	-0.38	LILK	TTFEDLIQR			Q20170801-09	160.139	1121	7e-08	1	1220	133016	HUMAN	Protein transport protein Sec31A
[243]		Q96FV9	THOC1_HUMAN	2	3.8	3.42	9.7e-08	496.94	3	329615	-0.031	IRKR	TAPEDFLGKGPTKK			Q20170801-09	93.0247	417	9.7e-08	1	657	75667	HUMAN	THO complex subunit 1
[243]		Q96FV9	THOC1_HUMAN	2	3.8	3.42	9.7e-08	614.34	2	277895	-0.39	-MSP	TPPLFSLPEAR			Q20170801-09	174.772	4	1.1e-07	1	657	75667	HUMAN	THO complex subunit 1
[244]		P39023	RL3_HUMAN	2	5.5	3.96	2.8e-08	531.255	3	186195	-1.2	RTFK	TVFAEHISDECKR	Carbamidomethyl@11		Q20170801-09	81.9424	104	2.8e-08	1	403	46109.3	HUMAN	60S ribosomal protein L3
[244]		P39023	RL3_HUMAN	2	5.5	3.96	2.8e-08	492.275	2	265235	0.85	SAPR	HGSLGFLPR			Q20170801-07	121.304	11	2.7e-07	1	403	46109.3	HUMAN	60S ribosomal protein L3
[245]		P18124	RL7_HUMAN	1	7.7	6.75	5.7e-13	705.999	3	102586	0.48	MKKK	TTHFVEGGDAGNREDQINR			Q20170801-09	76.1413	224	5.7e-13	1	248	29226	HUMAN	60S ribosomal protein L7
[246]		P26232	CTNA2_HUMAN	1	1.8	6.74	4.8e-12	909.946	2	87543	0.64	VRSR	TSVQTEDDQLIAGQSAR			Q20170801-09	114.783	653	4.8e-12	2	953	105314	HUMAN	Catenin alpha-2
[247]		Q5ST30	SYVM_HUMAN	1	1.4	6.74	6.5e-12	551.944	3	705505	-0.52	PRFH	SVSTQSEPHGSPISR		Abu@N-term	Q20170801-09	73.1929	27	6.5e-12	1	1063	118491	HUMAN	Valine--tRNA ligase, mitochondrial
[248]		P42677	RS27_HUMAN	2	25	3.42	2.6e-08	485.226	2	139445	-0.33	GKAR	LTEGCSFR	Carbamidomethyl@5		Q20170801-09	62.0508	73	2.6e-08	2	84	9461.2	HUMAN	40S ribosomal protein S27
[248]		P42677	RS27_HUMAN	2	25	3.42	2.6e-08	764.382	2	100	3.2	KKKR	LVQSPNSYFMDVK			Q20170801-09	162.646	24	4.6e-08	2	84	9461.2	HUMAN	40S ribosomal protein S27
[249]		Q9NZ32	ARP10_HUMAN	2	5.3	3.47	3.6e-08	563.29	2	187753	0.73	IKAR	TCFVSDLKR	Carbamidomethyl@2		Q20170801-09	90.6106	214	3.6e-08	1	417	46307.4	HUMAN	Actin-related protein 10
[249]		Q9NZ32	ARP10_HUMAN	2	5.3	3.47	3.6e-08	603.804	2	168384	0.1	-	MPLYEGLGSGGEK		Met-loss@1	Q20170801-09	103.713	1	1.2e-07	1	417	46307.4	HUMAN	Actin-related protein 10
[250]		O75487	GPC4_HUMAN	2	1.8	3.43	4.5e-08	570.289	2	892682	0.91	RISR	SISESAFSAR		Abu@N-term	Q20170801-07	113.298	355	4.5e-08	1	556	62412.7	HUMAN	Glypican-4
[250]		O75487	GPC4_HUMAN	2	1.8	3.43	4.5e-08	527.762	2	237614	0.3	RISR	SISESAFSAR			Q20170801-09	91.5997	355	2e-07	1	556	62412.7	HUMAN	Glypican-4
[251]		O75380	NDUS6_HUMAN	1	9.7	6.55	1.2e-12	710.311	2	232780	0.25	KETK	TGTCGYCGLQFR	Carbamidomethyl@4;Carbamidomethyl@7		Q20170801-09	131.916	109	1.2e-12	1	124	13711.7	HUMAN	NADH dehydrogenase [ubiquinone] iron-sulfur protein 6, mitochondrial
[252]		Q13162	PRDX4_HUMAN	1	7.7	6.55	4.8e-13	815.029	3	42643	0.2	ERPR	TREEECHFYAGGQVYPGEASR	Carbamidomethyl@6		Q20170801-09	114.99	46	4.8e-13	1	271	30540.2	HUMAN	Peroxiredoxin-4
[253]		Q96QK1	VPS35_HUMAN	3	4	3.31	1.2e-07	439.753	4	210864	1.2	LRTQ	CALAASKLLKKPDQGR	Carbamidomethyl@1		Q20170801-07	96.4141	653	1.2e-07	1	796	91707.8	HUMAN	Vacuolar protein sorting-associated protein 35
[253]		Q96QK1	VPS35_HUMAN	3	4	3.31	1.2e-07	894.953	2	97274	-1.5	LRLR	RESPESEGPIYEGLIL			Q20170801-09	190.182	781	2.1e-07	1	796	91707.8	HUMAN	Vacuolar protein sorting-associated protein 35
[253]		Q96QK1	VPS35_HUMAN	3	4	3.31	1.2e-07	816.904	2	185655	0.36	RLRR	ESPESEGPIYEGLIL			Q20170801-09	203.481	782	5.7e-05	1	796	91707.8	HUMAN	Vacuolar protein sorting-associated protein 35
[254]		Q92968	PEX13_HUMAN	1	3.2	6.39	2.9e-11	682.809	2	187972	-0.13	LWAE	SEGTVACLGAEDR	Carbamidomethyl@7		Q20170801-07	87.0239	214	2.9e-11	1	403	44130	HUMAN	Peroxisomal membrane protein PEX13
[255]		O75367	H2AY_HUMAN	5	16.4	2.7	2e-07	546.297	2	1060000	2.7	KKLK	SIAFPSIGSGR			Q20170801-09	150.693	308	2e-07	1	372	39617.4	HUMAN	Core histone macro-H2A.1
[255]		O75367	H2AY_HUMAN	5	16.4	2.7	2e-07	827.9	2	399608	-4.4	FVLF	DSESIGIYVQEMAK		Abu@N-term	Q20170801-09	117.109	355	0.00041	2	372	39617.4	HUMAN	Core histone macro-H2A.1
[255]		O75367	H2AY_HUMAN	5	16.4	2.7	2e-07	674.352	2	29594	2.1	LLEK	TVKNCLALADDK	Carbamidomethyl@5		Q20170801-09	80.4544	293	0.00046	1	372	39617.4	HUMAN	Core histone macro-H2A.1
[255]		O75367	H2AY_HUMAN	5	16.4	2.7	2e-07	645.032	3	111534	2.4	VTPR	HILLAVANDEELNQLLK			Q20170801-09	193.687	80	0.00053	2	372	39617.4	HUMAN	Core histone macro-H2A.1
[255]		O75367	H2AY_HUMAN	5	16.4	2.7	2e-07	396.734	2	486307	-0.61	LSTK	SLFLGQK			Q20170801-07	105.909	190	0.0011	1	372	39617.4	HUMAN	Core histone macro-H2A.1
[256]		P22102	PUR2_HUMAN	2	2.2	4.63	2.8e-09	519.282	2	1510000	2.9	FMDR	HGIPTAQWK			Q20170801-09	83.5103	117	2.8e-09	1	1010	107768	HUMAN	Trifunctional purine biosynthetic protein adenosine-3
[256]		P22102	PUR2_HUMAN	2	2.2	4.63	2.8e-09	483.254	3	194839	0.19	TDGK	TVAPMPPAQDHKR			Q20170801-09	44.3822	208	0.00073	1	1010	107768	HUMAN	Trifunctional purine biosynthetic protein adenosine-3
[257]		P51553	IDH3G_HUMAN	1	3.1	6.33	2.6e-12	701.883	2	162289	-0.0035	PSRN	IFSEQTIPPSAK		Abu@N-term	Q20170801-09	135.462	39	2.6e-12	1	393	42794.7	HUMAN	Isocitrate dehydrogenase [NAD] subunit gamma, mitochondrial
[258]		O15400	STX7_HUMAN	1	5.7	6.32	4.3e-11	834.934	2	313541	3.2	EIQR	TLNQLGTPQDSPELR			Q20170801-09	135.351	35	4.3e-11	1	261	29815.8	HUMAN	Syntaxin-7
[259]		P04818	TYSY_HUMAN	2	6.7	4.79	1.4e-10	713.36	2	124405	-2.1	KDDR	TGTGTLSVFGMQAR			Q20170801-09	161.682	51	1.4e-10	1	313	35716.3	HUMAN	Thymidylate synthase
[259]		P04818	TYSY_HUMAN	2	6.7	4.79	1.4e-10	440.209	2	126629	0.8	FQWR	HFGAEYR			Q20170801-09	43.1542	141	0.00022	1	313	35716.3	HUMAN	Thymidylate synthase
[260]		P40939	ECHA_HUMAN	2	3.7	3.76	2.3e-08	405.221	4	311246	0.91	KESK	ALMGLYHGQVLCKK	Carbamidomethyl@12		Q20170801-09	127.562	338	2.3e-08	1	763	83000.4	HUMAN	Trifunctional enzyme subunit alpha, mitochondrial
[260]		P40939	ECHA_HUMAN	2	3.7	3.76	2.3e-08	815.924	2	46314	0.88	AACK	TLQEVTQLSQEAQR			Q20170801-09	140.725	112	6.1e-06	1	763	83000.4	HUMAN	Trifunctional enzyme subunit alpha, mitochondrial
[261]		P04908	H2A1B_HUMAN	4	20	1.63	9.7e-05	472.769	2	1640000	-1.6	RSSR	AGLQFPVGR			Q20170801-09	136.266	22	9.7e-05	15	130	14135.6	HUMAN	Histone H2A type 1-B/E
[261]		P04908	H2A1B_HUMAN	4	20	1.63	9.7e-05	425.57	3	1450000	0.25	AKTR	SSRAGLQFPVGR			Q20170801-09	111.647	19	0.00013	13	130	14135.6	HUMAN	Histone H2A type 1-B/E
[261]		P04908	H2A1B_HUMAN	4	20	1.63	9.7e-05	564.973	3	435975	0.61	IIPR	HLQLAIRNDEELNK			Q20170801-09	112.623	83	0.00018	12	130	14135.6	HUMAN	Histone H2A type 1-B/E
[261]		P04908	H2A1B_HUMAN	4	20	1.63	9.7e-05	425.766	2	350307	-0.53	IIPR	HLQLAIR			Q20170801-07	96.6268	83	0.00019	14	130	14135.6	HUMAN	Histone H2A type 1-B/E
[262]		P22695	QCR2_HUMAN	1	3.5	6.2	7e-11	815.923	2	167980	-0.52	NQVK	TIAQGNLSNTDVQAAK			Q20170801-09	97.1531	360	7e-11	1	453	48443.4	HUMAN	Cytochrome b-c1 complex subunit 2, mitochondrial
[263]		Q6P2C8	MED27_HUMAN	1	3.5	6.19	1.8e-13	689.314	2	45625	-0.76	RDFR	TLEAFHDTCRQ	Carbamidomethyl@9		Q20170801-09	73.1866	301	1.8e-13	1	311	35432.1	HUMAN	Mediator of RNA polymerase II transcription subunit 27
[264]		Q9UBT2	SAE2_HUMAN	3	4.5	2.56	1.4e-06	476.239	2	1240000	-0.15	PTQR	TFPGCTIR	Carbamidomethyl@5		Q20170801-09	93.0705	169	1.4e-06	1	640	71224.2	HUMAN	SUMO-activating enzyme subunit 2
[264]		Q9UBT2	SAE2_HUMAN	3	4.5	2.56	1.4e-06	664.378	2	45227	0.32	DQCR	TIFLNKQPNPR			Q20170801-09	91.7333	415	4e-06	1	640	71224.2	HUMAN	SUMO-activating enzyme subunit 2
[264]		Q9UBT2	SAE2_HUMAN	3	4.5	2.56	1.4e-06	486.758	2	57899	-2.6	GLPR	ELAEAVAGGR			Q20170801-09	67.3902	10	0.00029	1	640	71224.2	HUMAN	SUMO-activating enzyme subunit 2
[265]		Q9BPX3	CND3_HUMAN	1	1.7	6.17	8.1e-11	645.647	3	187508	-0.86	PQAK	TSQDYQALTVHDNLAMK			Q20170801-09	140.666	817	8.1e-11	1	1015	114335	HUMAN	Condensin complex subunit 3
[266]		P42356	PI4KA_HUMAN	1	0.7	6.14	9.1e-11	732.372	2	107811	2.4	LKRK	TSSVSSISQVSPER			Q20170801-09	98.3328	255	9.1e-11	1	2102	236833	HUMAN	Phosphatidylinositol 4-kinase alpha
[267]		P13796	PLSL_HUMAN	1	2.6	6.14	4.7e-12	838.422	2	171310	-1.6	NQAK	FSLVGIGGQDLNEGNR			Q20170801-09	173.871	473	4.7e-12	1	627	70289	HUMAN	Plastin-2
[268]		Q6NVY1	HIBCH_HUMAN	2	6.2	4.06	3.2e-08	691.855	2	113224	2.8	GSSK	TLQEVLTMEYR			Q20170801-09	173.388	321	3.2e-08	1	386	43482.7	HUMAN	3-hydroxyisobutyryl-CoA hydrolase, mitochondrial
[268]		Q6NVY1	HIBCH_HUMAN	2	6.2	4.06	3.2e-08	523.283	3	554948	1.5	LRMS	KHTDAAEEVLLEK		Abu@N-term	Q20170801-07	102.117	30	8.7e-05	1	386	43482.7	HUMAN	3-hydroxyisobutyryl-CoA hydrolase, mitochondrial
[269]		P07602	SAP_HUMAN	3	3.2	2.35	3.4e-07	521.229	2	104692	2	QPKD	GGFCEVCK	Carbamidomethyl@4;Carbamidomethyl@7	Abu@N-term	Q20170801-07	71.5371	406	3.4e-07	1	524	58113.3	HUMAN	Prosaposin
[269]		P07602	SAP_HUMAN	3	3.2	2.35	3.4e-07	539.257	2	341476	-0.34	PTVK	SLPCDICK	Carbamidomethyl@4;Carbamidomethyl@7	Abu@N-term	Q20170801-07	104.707	60	1.1e-06	1	524	58113.3	HUMAN	Prosaposin
[269]		P07602	SAP_HUMAN	3	3.2	2.35	3.4e-07	390.519	3	215639	-0.3	QPKD	GGFCEVCKK	Carbamidomethyl@4;Carbamidomethyl@7	Abu@N-term	Q20170801-07	49.9885	406	6.6e-06	1	524	58113.3	HUMAN	Prosaposin
[270]		P05023	AT1A1_HUMAN	3	3.1	2.31	7.8e-06	553.303	2	680425	-0.68	SFDK	TSATWLALSR			Q20170801-09	153.233	414	7.8e-06	1	1023	112897	HUMAN	Sodium/potassium-transporting ATPase subunit alpha-1
[270]		P05023	AT1A1_HUMAN	3	3.1	2.31	7.8e-06	760.354	2	50051	-0.66	PQTR	SPDFTNENPLETR			Q20170801-07	143.762	228	1.6e-05	1	1023	112897	HUMAN	Sodium/potassium-transporting ATPase subunit alpha-1
[270]		P05023	AT1A1_HUMAN	3	3.1	2.31	7.8e-06	544.301	2	299249	0.81	PQQK	LIIVEGCQR	Carbamidomethyl@7		Q20170801-09	103.188	699	1.7e-05	5	1023	112897	HUMAN	Sodium/potassium-transporting ATPase subunit alpha-1
[271]		P49368	TCPG_HUMAN	2	3.5	4.53	5.4e-08	667.348	2	378826	-0.13	VIPR	TLIQNCGASTIR	Carbamidomethyl@6		Q20170801-07	102.897	450	5.4e-08	1	545	60534.5	HUMAN	T-complex protein 1 subunit gamma
[271]		P49368	TCPG_HUMAN	2	3.5	4.53	5.4e-08	401.245	2	2500000	-0.72	NAAK	TIADIIR			Q20170801-09	123.131	32	0.029	2	545	60534.5	HUMAN	T-complex protein 1 subunit gamma
[272]		Q9Y4W2	LAS1L_HUMAN	1	2.2	6.06	2.9e-11	845.412	2	84503	-1.1	AQKR	GALQGSAWQVSSEDVR			Q20170801-07	146.026	631	2.9e-11	1	734	83065.6	HUMAN	Ribosomal biogenesis protein LAS1L
[273]		Q9H4L4	SENP3_HUMAN	1	2.6	6.06	1.3e-10	750.877	2	172738	1.6	KSGG	GFGPDPGSGTTVPAR		Abu@N-term	Q20170801-09	119.536	47	1.3e-10	1	574	65010.4	HUMAN	Sentrin-specific protease 3
[274]		P61247	RS3A_HUMAN	2	6.8	4.52	9.3e-10	406.538	3	168009	-1.2	QIRK	TSYAQHQQVR			Q20170801-09	20.4761	153	9.3e-10	1	264	29945.2	HUMAN	40S ribosomal protein S3a
[274]		P61247	RS3A_HUMAN	2	6.8	4.52	9.3e-10	469.751	2	248475	0.63	VDVK	TTDGYLLR			Q20170801-09	97.0391	129	0.00035	1	264	29945.2	HUMAN	40S ribosomal protein S3a
[275]		Q9Y265	RUVB1_HUMAN	2	5	3.48	1.1e-07	540.843	2	176849	1	GYGK	TISHVIIGLK			Q20170801-09	124.888	153	1.1e-07	1	456	50228.5	HUMAN	RuvB-like 1
[275]		Q9Y265	RUVB1_HUMAN	2	5	3.48	1.1e-07	650.834	2	58769	-0.29	GLAK	QAASGLVGQENAR			Q20170801-09	61.0769	34	7.8e-06	1	456	50228.5	HUMAN	RuvB-like 1
[276]		Q7Z2T5	TRM1L_HUMAN	3	4.6	2.89	4.2e-08	530.258	2	215968	4.1	RVSR	THFDPMGVR			Q20170801-09	97.0808	668	4.2e-08	1	733	81748.1	HUMAN	TRMT1-like protein
[276]		Q7Z2T5	TRM1L_HUMAN	3	4.6	2.89	4.2e-08	525.768	2	146369	0.68	MGVR	TDAPLMQFK			Q20170801-07	137.092	677	1.1e-06	1	733	81748.1	HUMAN	TRMT1-like protein
[276]		Q7Z2T5	TRM1L_HUMAN	3	4.6	2.89	4.2e-08	494.739	4	133479	2.7	KKQK	TDVSTEHPPFYYNIHR			Q20170801-09	136.95	625	0.00046	1	733	81748.1	HUMAN	TRMT1-like protein
[277]		O95573	ACSL3_HUMAN	2	3.1	3.54	2.8e-08	566.774	2	157562	1.3	KELK	THYQADIER			Q20170801-09	46.5958	707	2.8e-08	1	720	80420.8	HUMAN	Long-chain-fatty-acid--CoA ligase 3
[277]		O95573	ACSL3_HUMAN	2	3.1	3.54	2.8e-08	519.571	3	236295	0.75	NEAK	TKADFFEDENGQR			Q20170801-09	91.1213	546	4.1e-06	1	720	80420.8	HUMAN	Long-chain-fatty-acid--CoA ligase 3
[278]		Q5T440	CAF17_HUMAN	1	5.9	5.81	3.1e-12	749.995	3	186036	2.5	RCRL	AHSSCSPGGDPTAGAAWACFR	Carbamidomethyl@5;Carbamidomethyl@19	Abu@N-term	Q20170801-09	146.635	32	3.1e-12	1	356	38155.3	HUMAN	Putative transferase CAF17, mitochondrial
[279]		O43143	DHX15_HUMAN	2	3.3	2.91	2e-07	723.371	2	36295	-2.1	ILVR	HQSFVLVGETGSGK			Q20170801-09	106.486	153	2e-07	1	795	90933.6	HUMAN	Pre-mRNA-splicing factor ATP-dependent RNA helicase DHX15
[279]		O43143	DHX15_HUMAN	2	3.3	2.91	2e-07	497.263	3	619292	1.7	NYIR	TCTDIKPEWLVK	Carbamidomethyl@2		Q20170801-09	145.667	749	2.1e-07	1	795	90933.6	HUMAN	Pre-mRNA-splicing factor ATP-dependent RNA helicase DHX15
[280]		Q13011	ECH1_HUMAN	2	10.1	5.4	8.7e-12	883.407	3	74841	-0.34	SLRL	TGSSAQEEASGVALGEAPDHSYESLR			Q20170801-09	146.973	34	8.7e-12	1	328	35816.5	HUMAN	Delta(3,5)-Delta(2,4)-dienoyl-CoA isomerase, mitochondrial
[280]		Q13011	ECH1_HUMAN	2	10.1	5.4	8.7e-12	398.235	2	487178	0.88	KELK	TVTFSKL			Q20170801-09	112.312	322	0.015	1	328	35816.5	HUMAN	Delta(3,5)-Delta(2,4)-dienoyl-CoA isomerase, mitochondrial
[281]		Q9Y6C9	MTCH2_HUMAN	2	6.6	3.97	1.5e-09	442.912	3	210449	2.2	LTPR	LCSGVLGTVVHGK	Carbamidomethyl@2		Q20170801-09	121.545	78	1.5e-09	1	303	33331.2	HUMAN	Mitochondrial carrier homolog 2
[281]		Q9Y6C9	MTCH2_HUMAN	2	6.6	3.97	1.5e-09	480.202	2	99277	0.75	PFGK	TYCCDLK	Carbamidomethyl@3;Carbamidomethyl@4		Q20170801-09	47.9323	294	1.8e-05	1	303	33331.2	HUMAN	Mitochondrial carrier homolog 2
[282]		Q8WXH0	SYNE2_HUMAN	3	0.5	2.28	6.7e-07	724.355	2	112097	-0.0025	FHEK	TSALQEEADSIQR			Q20170801-09	118.924	2952	6.7e-07	1	6885	796449	HUMAN	Nesprin-2
[282]		Q8WXH0	SYNE2_HUMAN	3	0.5	2.28	6.7e-07	647.321	2	51602	0.023	QRRR	TTCALTLEAGEK	Carbamidomethyl@3		Q20170801-09	102.1	5756	3.1e-06	1	6885	796449	HUMAN	Nesprin-2
[282]		Q8WXH0	SYNE2_HUMAN	3	0.5	2.28	6.7e-07	457.232	2	361161	-4.3	NFAR	SFYPMLR			Q20170801-09	148.186	6871	1.7e-05	1	6885	796449	HUMAN	Nesprin-2
[283]		O43318	M3K7_HUMAN	1	3	5.7	2.5e-10	980.503	2	128748	0.18	PRRR	SIQDLTVTGTEPGQVSSR		Abu@N-term	Q20170801-09	156.728	439	2.5e-10	1	606	67196.7	HUMAN	Mitogen-activated protein kinase kinase kinase 7
[284]		Q9Y3D0	MIP18_HUMAN	1	13.5	5.69	2e-10	1129.09	2	99061	-1.8	-	MVGGGGVGGGLLENANPLIYQR		Abu@N-term	Q20170801-09	192.353	1	2e-10	1	163	17663.2	HUMAN	Mitotic spindle-associated MMXD complex subunit MIP18
[285]		Q02790	FKBP4_HUMAN	2	7.8	3.36	8e-08	552.285	2	1020000	-0.13	KAAK	TQLAVCQQR	Carbamidomethyl@6		Q20170801-09	54.7423	391	8e-08	1	459	51805	HUMAN	Peptidyl-prolyl cis-trans isomerase FKBP4
[285]		Q02790	FKBP4_HUMAN	2	7.8	3.36	8e-08	953.798	3	111772	1	-M	TAEEMKATESGAQSAPLPMEGVDISPK		Abu@N-term	Q20170801-09	166.152	2	6.7e-06	1	459	51805	HUMAN	Peptidyl-prolyl cis-trans isomerase FKBP4
[286]		Q14684	RRP1B_HUMAN	4	6.6	1.76	2.9e-05	557.317	2	193443	-0.15	KTDK	SILVSPTGPSR			Q20170801-09	106.813	702	2.9e-05	1	758	84428.2	HUMAN	Ribosomal RNA processing protein 1 homolog B
[286]		Q14684	RRP1B_HUMAN	4	6.6	1.76	2.9e-05	743.879	2	67311	2	-MA	PAMQPAEIQFAQR			Q20170801-09	142.078	3	4.6e-05	1	758	84428.2	HUMAN	Ribosomal RNA processing protein 1 homolog B
[286]		Q14684	RRP1B_HUMAN	4	6.6	1.76	2.9e-05	461.596	3	332939	-0.59	IAAK	TKDHTLVQTIAR			Q20170801-09	77.0297	203	0.00015	1	758	84428.2	HUMAN	Ribosomal RNA processing protein 1 homolog B
[286]		Q14684	RRP1B_HUMAN	4	6.6	1.76	2.9e-05	671.863	2	170894	-2.2	GVLK	TPTSSPASSPLVAK			Q20170801-09	86.4672	728	0.0013	1	758	84428.2	HUMAN	Ribosomal RNA processing protein 1 homolog B
[287]		P17858	PFKAL_HUMAN	2	3.3	3.99	7.7e-09	636.663	3	283494	1.7	FDCR	TNVLGHLQQGGAPTPFDR			Q20170801-09	155.067	655	7.7e-09	1	780	85019.2	HUMAN	ATP-dependent 6-phosphofructokinase, liver type
[287]		P17858	PFKAL_HUMAN	2	3.3	3.99	7.7e-09	449.721	2	1020000	0.3	VTRR	TLSMDKGF			Q20170801-09	113.111	773	0.00016	1	780	85019.2	HUMAN	ATP-dependent 6-phosphofructokinase, liver type
[288]		P49321	NASP_HUMAN	2	2.5	3.5	6.7e-08	642.84	2	223094	0.17	SSSN	CVTDISHLVR	Carbamidomethyl@1	Abu@N-term	Q20170801-09	144.583	708	6.7e-08	1	788	85238.4	HUMAN	Nuclear autoantigenic sperm protein
[288]		P49321	NASP_HUMAN	2	2.5	3.5	6.7e-08	501.285	2	315828	0.74	ESQR	SGNVAELALK			Q20170801-09	111.32	662	2.3e-05	1	788	85238.4	HUMAN	Nuclear autoantigenic sperm protein
[289]		Q02878	RL6_HUMAN	2	7.3	3.13	3.3e-07	454.258	3	345002	0.91	PLRR	THQKFVIATSTK			Q20170801-09	60.7681	189	3.3e-07	1	288	32728.2	HUMAN	60S ribosomal protein L6
[289]		Q02878	RL6_HUMAN	2	7.3	3.13	3.3e-07	570.271	2	118127	-1.8	KMPR	YYPTEDVPR			Q20170801-09	101.015	115	5.3e-06	1	288	32728.2	HUMAN	60S ribosomal protein L6
[290]		P27695	APEX1_HUMAN	2	8.8	4.32	1e-08	624.638	3	126577	0.94	RGKK	GAVAEDGDELRTEPEAK		Abu@N-term	Q20170801-07	93.2196	8	1e-08	1	318	35554.8	HUMAN	DNA-(apurinic or apyrimidinic site) lyase
[290]		P27695	APEX1_HUMAN	2	8.8	4.32	1e-08	543.811	2	18134	-1.1	PDQK	TSPSGKPATLK			Q20170801-09	21.5731	53	0.0012	1	318	35554.8	HUMAN	DNA-(apurinic or apyrimidinic site) lyase
[291]		P49411	EFTU_HUMAN	2	4.4	3.16	2.7e-07	421.225	3	708331	0.035	KNIR	TVVTGIEMFHK			Q20170801-09	141.897	301	2.7e-07	1	452	49542	HUMAN	Elongation factor Tu, mitochondrial
[291]		P49411	EFTU_HUMAN	2	4.4	3.16	2.7e-07	460.276	2	674888	-0.24	DHGK	TTLTAAITK			Q20170801-09	89.9878	71	7.7e-06	1	452	49542	HUMAN	Elongation factor Tu, mitochondrial
[292]		O75131	CPNE3_HUMAN	1	2	5.52	1.7e-11	422.906	3	2640000	-0.76	QKKK	SYKNSGVISVK		Abu@N-term	Q20170801-07	78.6283	260	1.7e-11	1	537	60131.2	HUMAN	Copine-3
[293]		Q676U5	A16L1_HUMAN	1	3.8	5.5	1.1e-09	631.815	4	335955	-1.2	FGRR	SVSSFPVPQDNVDTHPGSGKEVR		Abu@N-term	Q20170801-09	129.792	287	1.1e-09	1	607	68265.6	HUMAN	Autophagy-related protein 16-1
[294]		O95239	KIF4A_HUMAN	1	1.1	5.48	9e-12	670.317	2	81465	0.065	NNSR	TVASTAMNSQSSR			Q20170801-09	46.3488	199	9e-12	2	1232	139882	HUMAN	Chromosome-associated kinesin KIF4A
[295]		P05204	HMGN2_HUMAN	1	16.7	5.47	2.3e-10	396.992	4	248896	-0.72	RSAR	LSAKPAPPKPEPKPK			Q20170801-07	46.2558	28	2.3e-10	1	90	9392.7	HUMAN	Non-histone chromosomal protein HMG-17
[296]		P20020	AT2B1_HUMAN	2	2.2	2.94	8.4e-07	828.899	2	55212	4.4	TKLK	TSPNEGLSGNPADLER			Q20170801-09	118.435	65	8.4e-07	1	1258	138756	HUMAN	Plasma membrane calcium-transporting ATPase 1
[296]		P20020	AT2B1_HUMAN	2	2.2	2.94	8.4e-07	651.84	2	324008	0.35	DIVK	TVIEPMASEGLR			Q20170801-09	135.499	635	5.4e-06	1	1258	138756	HUMAN	Plasma membrane calcium-transporting ATPase 1
[297]		O00217	NDUS8_HUMAN	1	7.1	5.44	1.8e-10	631.613	3	184382	0.34	AVAA	TYKYVNMQDPEMDMK			Q20170801-07	141.522	35	1.8e-10	1	210	23705.3	HUMAN	NADH dehydrogenase [ubiquinone] iron-sulfur protein 8, mitochondrial
[298]		P56192	SYMC_HUMAN	1	1.8	5.42	1.9e-09	902.455	2	833189	-0.14	WLGR	TLPGSDWTPNAQFITR			Q20170801-09	180.25	468	1.9e-09	1	900	101117	HUMAN	Methionine--tRNA ligase, cytoplasmic
[299]		Q01581	HMCS1_HUMAN	1	2.5	5.41	1.7e-10	689.837	2	152471	-0.025	LDSR	TGVAPDVFAENMK			Q20170801-07	153.599	416	1.7e-10	1	520	57294.1	HUMAN	Hydroxymethylglutaryl-CoA synthase, cytoplasmic
[300]		O95816	BAG2_HUMAN	1	5.2	5.41	2.4e-11	654.32	2	105241	-0.47	AGSK	TLQQNAESRFN			Q20170801-09	84.8607	201	2.4e-11	1	211	23772.1	HUMAN	BAG family molecular chaperone regulator 2
[301]		Q01844	EWS_HUMAN	1	2.6	5.41	2.6e-10	840.403	2	153814	-0.77	GGRR	GGPGGPPGPLMEQMGGR		Abu@N-term	Q20170801-09	148.084	616	2.6e-10	1	656	68478.8	HUMAN	RNA-binding protein EWS
[302]		O60231	DHX16_HUMAN	1	1.2	5.36	1.2e-11	705.833	2	41036	-0.95	YNPR	TGMESLTVTPCSK	Carbamidomethyl@11		Q20170801-07	120.146	704	1.2e-11	1	1041	119265	HUMAN	Putative pre-mRNA-splicing factor ATP-dependent RNA helicase DHX16
[303]		P40925	MDHC_HUMAN	2	8.1	3.68	7.6e-09	569.624	3	131925	3.2	TASK	SAPSIPKENFSCLTR	Carbamidomethyl@12		Q20170801-07	142.353	143	7.6e-09	1	334	36426.4	HUMAN	Malate dehydrogenase, cytoplasmic
[303]		P40925	MDHC_HUMAN	2	8.1	3.68	7.6e-09	697.357	2	64157	-2.4	KTWK	FVEGLPINDFSR			Q20170801-09	178.24	299	3.4e-06	1	334	36426.4	HUMAN	Malate dehydrogenase, cytoplasmic
[304]		O15027	SC16A_HUMAN	2	1.1	3.2	2.1e-08	713.833	2	67273	-0.57	TPSR	TVPDSEAPPGWDR			Q20170801-09	118.459	1880	2.1e-08	1	2179	233519	HUMAN	Protein transport protein Sec16A
[304]		O15027	SC16A_HUMAN	2	1.1	3.2	2.1e-08	627.796	2	69756	2.6	VESR	TMATMGDTLASR			Q20170801-09	110.262	1544	2.5e-06	1	2179	233519	HUMAN	Protein transport protein Sec16A
[305]		Q7LGA3	HS2ST_HUMAN	1	4.5	5.28	5.6e-11	881.917	2	128087	-2.9	RVPK	TASTSFTNIAYDLCAK	Carbamidomethyl@14		Q20170801-09	178.176	84	5.6e-11	1	356	41881.6	HUMAN	Heparan sulfate 2-O-sulfotransferase 1
[306]		Q7L014	DDX46_HUMAN	3	2.5	3.4	3e-08	476.938	3	324405	-3.3	VSAK	TIAEQLAEKINAK			Q20170801-09	147.566	895	3e-08	1	1031	117363	HUMAN	Probable ATP-dependent RNA helicase DDX46
[306]		Q7L014	DDX46_HUMAN	3	2.5	3.4	3e-08	501.778	2	322546	1.5	VSAK	TIAEQLAEK			Q20170801-09	84.9015	895	3.1e-05	1	1031	117363	HUMAN	Probable ATP-dependent RNA helicase DDX46
[306]		Q7L014	DDX46_HUMAN	3	2.5	3.4	3e-08	651.846	2	798004	-4.6	VCVY	GGTGISEQIAELK			Q20170801-09	141.669	481	0.04	1	1031	117363	HUMAN	Probable ATP-dependent RNA helicase DDX46
[307]		Q04941	PLP2_HUMAN	1	8.6	5.26	1.5e-10	624.796	2	590097	-0.4	RQPR	HTAAPTDPADGPV			Q20170801-09	80.0581	140	1.5e-10	1	152	16690.9	HUMAN	Proteolipid protein 2
[308]		Q14126	DSG2_HUMAN	2	2.5	2.65	5.3e-07	682.355	3	67360	-0.53	PVPK	SLQEANAEKVTQEIVTER			Q20170801-09	154.887	893	5.3e-07	1	1118	122295	HUMAN	Desmoglein-2
[308]		Q14126	DSG2_HUMAN	2	2.5	2.65	5.3e-07	559.796	2	409071	-1.9	LKFK	TLAEVCLGQK	Carbamidomethyl@6		Q20170801-09	107.109	835	6.6e-07	1	1118	122295	HUMAN	Desmoglein-2
[309]		Q8NBJ5	GT251_HUMAN	4	4	2.12	1.5e-07	405.584	3	209527	0.23	YYKR	TPAYIPIRKR			Q20170801-09	74.8689	214	1.5e-07	1	622	71636.7	HUMAN	Procollagen galactosyltransferase 1
[309]		Q8NBJ5	GT251_HUMAN	4	4	2.12	1.5e-07	463.225	2	1400000	1.3	GADA	YFPEER		Abu@N-term	Q20170801-09	90.8525	37	3.9e-05	1	622	71636.7	HUMAN	Procollagen galactosyltransferase 1
[309]		Q8NBJ5	GT251_HUMAN	4	4	2.12	1.5e-07	465.774	2	155048	0.85	YYKR	TPAYIPIR			Q20170801-07	123.734	214	5.3e-05	1	622	71636.7	HUMAN	Procollagen galactosyltransferase 1
[309]		Q8NBJ5	GT251_HUMAN	4	4	2.12	1.5e-07	547.281	2	110513	1.7	GLQK	SLVFEDDLR			Q20170801-07	156.87	431	0.0016	1	622	71636.7	HUMAN	Procollagen galactosyltransferase 1
[310]		P45973	CBX5_HUMAN	1	5.8	5.21	2.7e-10	641.799	2	128700	-0.11	NKRK	SNFSNSADDIK		Abu@N-term	Q20170801-09	77.0077	92	2.7e-10	1	191	22225.2	HUMAN	Chromobox protein homolog 5
[311]		Q14498	RBM39_HUMAN	2	3.8	2.89	1.7e-06	495.765	2	435691	0.66	ELER	TGIDLGTTGR			Q20170801-09	88.8925	347	1.7e-06	1	530	59380.1	HUMAN	RNA-binding protein 39
[311]		Q14498	RBM39_HUMAN	2	3.8	2.89	1.7e-06	598.799	2	105185	-0.78	RDAR	TVFCMQLAAR	Carbamidomethyl@4		Q20170801-09	153.691	154	2.1e-05	2	530	59380.1	HUMAN	RNA-binding protein 39
[312]		Q7KZF4	SND1_HUMAN	3	3.6	2.66	7.4e-07	609.838	2	615991	-0.88	GIIK	MVLSGCAIIVR	Carbamidomethyl@6		Q20170801-09	159.933	26	7.4e-07	1	910	101998	HUMAN	Staphylococcal nuclease domain-containing protein 1
[312]		Q7KZF4	SND1_HUMAN	3	3.6	2.66	7.4e-07	487.903	3	337541	-2.3	DDQR	SSHYDELLAAEAR			Q20170801-09	122.233	473	0.00016	1	910	101998	HUMAN	Staphylococcal nuclease domain-containing protein 1
[312]		Q7KZF4	SND1_HUMAN	3	3.6	2.66	7.4e-07	481.251	2	295071	0.65	DDAR	TDAVDSVVR			Q20170801-09	73.497	811	0.00053	1	910	101998	HUMAN	Staphylococcal nuclease domain-containing protein 1
[313]		Q13303	KCAB2_HUMAN	1	3.3	5.17	3.1e-10	691.324	2	61135	-0.84	-	MYPESTTGSPAR		Abu@N-term	Q20170801-09	80.6199	1	3.1e-10	1	367	41000.6	HUMAN	Voltage-gated potassium channel subunit beta-2
[314]		Q13813	SPTN1_HUMAN	2	0.8	2.98	2.2e-06	662.85	2	69073	-2.6	AEER	SQLLGSAHEVQR			Q20170801-09	72.255	1226	2.2e-06	1	2472	284542	HUMAN	Spectrin alpha chain, non-erythrocytic 1
[314]		Q13813	SPTN1_HUMAN	2	0.8	2.98	2.2e-06	537.283	2	172118	0.58	ERWR	SLQQLAEER			Q20170801-09	101.264	1217	6.8e-05	1	2472	284542	HUMAN	Spectrin alpha chain, non-erythrocytic 1
[315]		Q53GS9	SNUT2_HUMAN	1	2.1	5.14	1.9e-10	677.345	2	229102	-0.42	KKKK	TIVTDVFQGSMR			Q20170801-07	174.252	343	1.9e-10	1	565	65381.1	HUMAN	U4/U6.U5 tri-snRNP-associated protein 2
[316]		P55786	PSA_HUMAN	2	2.5	4.05	1.1e-08	730.856	2	90827	-0.2	YLVA	FVVGEYDFVETR			Q20170801-09	176.824	248	1.1e-08	2	919	103277	HUMAN	Puromycin-sensitive aminopeptidase
[316]		P55786	PSA_HUMAN	2	2.5	4.05	1.1e-08	408.878	3	189502	-0.68	GFYR	SKYTTPSGEVR			Q20170801-09	43.76	162	0.0037	2	919	103277	HUMAN	Puromycin-sensitive aminopeptidase
[317]		Q9BQG0	MBB1A_HUMAN	3	2	2.49	1.6e-05	494.278	2	105567	1.4	LVIR	SPSLLQSGAK			Q20170801-09	69.0514	1308	1.6e-05	1	1328	148856	HUMAN	Myb-binding protein 1A
[317]		Q9BQG0	MBB1A_HUMAN	3	2	2.49	1.6e-05	555.808	2	308311	-0.091	VRPR	HQACLLLQK	Carbamidomethyl@4		Q20170801-09	79.0349	1028	1.6e-05	1	1328	148856	HUMAN	Myb-binding protein 1A
[317]		Q9BQG0	MBB1A_HUMAN	3	2	2.49	1.6e-05	407.743	2	110671	-0.25	VLGK	SPLSALAR			Q20170801-07	107.833	1290	0.0043	1	1328	148856	HUMAN	Myb-binding protein 1A
[318]		Q14683	SMC1A_HUMAN	2	1.5	2.78	5.7e-07	506.267	2	296204	0.5	SIKR	LYPGSVYGR			Q20170801-09	101.009	510	5.7e-07	1	1233	143234	HUMAN	Structural maintenance of chromosomes protein 1A
[318]		Q14683	SMC1A_HUMAN	2	1.5	2.78	5.7e-07	533.283	2	540550	1.9	PKER	TALFEEISR			Q20170801-09	147.155	152	4.5e-06	1	1233	143234	HUMAN	Structural maintenance of chromosomes protein 1A
[319]		P00167	CYB5_HUMAN	2	20.9	3.96	3e-09	650.28	3	126709	-0.96	LREQ	AGGDATENFEDVGHSTDAR			Q20170801-07	99.0517	55	3e-09	1	134	15330.2	HUMAN	Cytochrome b5
[319]		P00167	CYB5_HUMAN	2	20.9	3.96	3e-09	378.885	3	501631	-0.14	NHSK	STWLILHHK			Q20170801-09	109.218	25	3.4e-05	1	134	15330.2	HUMAN	Cytochrome b5
[320]		Q9H1E3	NUCKS_HUMAN	2	4.5	2.58	3.7e-06	492.79	2	69429	0.39	PRLK	ATVTPSPVK		Abu@N-term	Q20170801-07	61.7035	176	3.7e-06	1	243	27296.6	HUMAN	Nuclear ubiquitous casein and cyclin-dependent kinase substrate 1
[320]		Q9H1E3	NUCKS_HUMAN	2	4.5	2.58	3.7e-06	390.567	3	572750	-2.1	PRLK	ATVTPSPVKGK		Abu@N-term	Q20170801-07	43.8132	176	5.1e-06	1	243	27296.6	HUMAN	Nuclear ubiquitous casein and cyclin-dependent kinase substrate 1
[321]		Q92522	H1X_HUMAN	1	8.5	5.06	4.5e-10	980.497	2	113220	-3.7	-M	SVELEEALPVTTAEGMAK		Abu@N-term	Q20170801-09	181.962	2	4.5e-10	1	213	22487.3	HUMAN	Histone H1x
[322]		P62249	RS16_HUMAN	2	15.8	3.71	9.1e-08	500.616	3	280295	1.4	-	MPSKGPLQSVQVFGR		Met-loss@1	Q20170801-07	141.295	1	9.1e-08	1	146	16445.5	HUMAN	40S ribosomal protein S16
[322]		P62249	RS16_HUMAN	2	15.8	3.71	9.1e-08	442.764	2	1300000	-0.37	QYDR	TLLVADPR			Q20170801-09	103.419	118	0.00074	1	146	16445.5	HUMAN	40S ribosomal protein S16
[323]		Q14258	TRI25_HUMAN	1	3	5	4.9e-10	659.99	3	153492	0.43	VEHK	TCSPASLSQASADLEATLR	Carbamidomethyl@2		Q20170801-09	185.011	185	4.9e-10	1	630	70974.1	HUMAN	E3 ubiquitin/ISG15 ligase TRIM25
[324]		Q15717	ELAV1_HUMAN	1	4	4.99	2.2e-11	529.911	3	100939	2.1	GLPR	TMTQKDVEDMFSR			Q20170801-09	151.757	116	2.2e-11	1	326	36092.2	HUMAN	ELAV-like protein 1
[325]		P31150	GDIA_HUMAN	1	3.4	4.95	5.4e-10	919.915	2	185481	0.33	ALYR	TDDYLDQPCLETVNR	Carbamidomethyl@9		Q20170801-09	154.098	194	5.4e-10	1	447	50583.2	HUMAN	Rab GDP dissociation inhibitor alpha
[326]		P52292	IMA1_HUMAN	2	3.8	2.64	1.1e-07	689.354	2	103000	4.3	GYLR	NLTWTLSNLCR	Carbamidomethyl@10		Q20170801-07	180.311	228	1.1e-07	2	529	57862.4	HUMAN	Importin subunit alpha-1
[326]		P52292	IMA1_HUMAN	2	3.8	2.64	1.1e-07	470.795	2	2020000	0.1	MVVK	TGVVPQLVK			Q20170801-09	121.029	292	1.3e-06	1	529	57862.4	HUMAN	Importin subunit alpha-1
[327]		P19367	HXK1_HUMAN	2	2	2.94	1.1e-07	570.301	2	328911	-0.23	PRLR	TTVGVDGSLYK			Q20170801-09	107.79	408	1.1e-07	1	917	102487	HUMAN	Hexokinase-1
[327]		P19367	HXK1_HUMAN	2	2	2.94	1.1e-07	670.341	3	71365	0.33	PRLR	TTVGVDGSLYKTHPQYSR			Q20170801-09	109.692	408	5.9e-06	1	917	102487	HUMAN	Hexokinase-1
[328]		Q8IY37	DHX37_HUMAN	1	1	4.95	2e-11	737.32	2	66078	0.44	FNKR	TPLEDYSGECFR	Carbamidomethyl@10		Q20170801-09	139.576	447	2e-11	1	1157	129547	HUMAN	Probable ATP-dependent RNA helicase DHX37
[329]		P52565	GDIR1_HUMAN	1	7.8	4.94	1.6e-08	639.984	3	286624	-0.7	PAQK	SIQEIQELDKDDESLR			Q20170801-09	147.762	34	1.6e-08	1	204	23207.3	HUMAN	Rho GDP-dissociation inhibitor 1
[330]		P63241	IF5A1_HUMAN	1	10.4	4.92	1.1e-10	541.281	3	475012	0.51	ITVL	SAMTEEAAVAIKAMAK			Q20170801-09	171.194	139	1.1e-10	2	154	16832.4	HUMAN	Eukaryotic translation initiation factor 5A-1
[331]		Q14165	MLEC_HUMAN	1	4.5	4.91	7.6e-09	796.879	2	96991	-2.5	PILR	SNPEDQILYQTER			Q20170801-09	136.665	91	7.6e-09	1	292	32234.1	HUMAN	Malectin
[332]		O75251	NDUS7_HUMAN	1	8.9	4.88	4.7e-10	669.018	3	116020	1.7	QARG	VHQSVATDGPSSTQPALPK		Abu@N-term	Q20170801-07	101.869	30	4.7e-10	1	213	23563.7	HUMAN	NADH dehydrogenase [ubiquinone] iron-sulfur protein 7, mitochondrial
[333]		Q96FW1	OTUB1_HUMAN	1	3.7	4.87	4.7e-11	643.29	2	296962	-1.5	YIRK	TRPDGNCFYR	Carbamidomethyl@7		Q20170801-07	65.113	85	4.7e-11	1	271	31284.3	HUMAN	Ubiquitin thioesterase OTUB1
[334]		Q07812	BAX_HUMAN	1	6.8	4.8	2.2e-08	716.402	2	156403	0.32	QIMK	TGALLLQGFIQDR			Q20170801-07	191.672	22	2.2e-08	1	192	21184.6	HUMAN	Apoptosis regulator BAX
[335]		P07737	PROF1_HUMAN	2	22.9	2.65	1.1e-06	735.882	2	127331	-1.2	GKDR	SSFYVNGLTLGGQK			Q20170801-09	166.432	57	1.1e-06	1	140	15054.4	HUMAN	Profilin-1
[335]		P07737	PROF1_HUMAN	2	22.9	2.65	1.1e-06	639.025	3	216345	-1.9	VPGK	TFVNITPAEVGVLVGKDR			Q20170801-09	188.51	39	9.4e-06	1	140	15054.4	HUMAN	Profilin-1
[336]		Q8WUM4	PDC6I_HUMAN	1	1.4	4.78	7e-10	652.848	2	256315	0.35	NPAK	TMQGSEVVNVLK			Q20170801-09	140.98	542	7e-10	1	868	96024	HUMAN	Programmed cell death 6-interacting protein
[337]		Q969N2	PIGT_HUMAN	1	2.2	4.76	1e-08	730.854	2	188306	-3.3	MFSR	TLTEPCPLASESR	Carbamidomethyl@6		Q20170801-09	116.266	267	1e-08	1	578	65700.2	HUMAN	GPI transamidase component PIG-T
[338]		Q16836	HCDH_HUMAN	2	6.1	2.39	1.9e-06	364.85	3	559410	-0.45	FGKK	TGEGFYKYK			Q20170801-09	72.5184	306	1.9e-06	1	314	34293.8	HUMAN	Hydroxyacyl-coenzyme A dehydrogenase, mitochondrial
[338]		Q16836	HCDH_HUMAN	2	6.1	2.39	1.9e-06	586.796	2	144892	0.63	TSQK	TFESLVDFSK			Q20170801-09	172.436	193	2.3e-06	1	314	34293.8	HUMAN	Hydroxyacyl-coenzyme A dehydrogenase, mitochondrial
[339]		P11940	PABP1_HUMAN	1	2.7	4.72	3.2e-09	964.96	2	58070	-0.72	ITRR	SLGYAYVNFQQPADAER			Q20170801-09	167.447	51	3.2e-09	2	636	70671.5	HUMAN	Polyadenylate-binding protein 1
[340]		Q06323	PSME1_HUMAN	1	4.4	4.66	2.5e-09	634.831	2	284108	1.2	LCTK	TENLLGSYFPK			Q20170801-09	175.313	25	2.5e-09	1	249	28723.3	HUMAN	Proteasome activator complex subunit 1
[341]		P07237	PDIA1_HUMAN	3	4.5	2.78	5.4e-07	533.762	2	599121	0.24	SADR	TVIDYNGER			Q20170801-09	77.7611	453	5.4e-07	1	508	57116.8	HUMAN	Protein disulfide-isomerase
[341]		P07237	PDIA1_HUMAN	3	4.5	2.78	5.4e-07	507.923	3	269878	-0.37	LVRA	DAPEEEDHVLVLR			Q20170801-09	132.186	18	6.9e-05	1	508	57116.8	HUMAN	Protein disulfide-isomerase
[341]		P07237	PDIA1_HUMAN	3	4.5	2.78	5.4e-07	550.622	3	188199	0.96	LVRA	DAPEEEDHVLVLRK			Q20170801-09	107.898	18	0.029	1	508	57116.8	HUMAN	Protein disulfide-isomerase
[342]		Q96PZ0	PUS7_HUMAN	2	3.2	2.94	6.4e-07	691.025	3	154501	2	SLKR	GALVVEDNDSGVPVEETKK		Abu@N-term	Q20170801-09	123.961	14	6.4e-07	1	661	75036.1	HUMAN	Pseudouridylate synthase 7 homolog
[342]		Q96PZ0	PUS7_HUMAN	2	3.2	2.94	6.4e-07	776.408	3	63319	-0.021	SLKR	GALVVEDNDSGVPVEETKKQK		Abu@N-term	Q20170801-09	109.233	14	0.00013	1	661	75036.1	HUMAN	Pseudouridylate synthase 7 homolog
[343]		P62888	RL30_HUMAN	2	27	3.6	2.1e-08	672.319	3	160589	0.74	MLAK	TGVHHYSGNNIELGTACGK	Carbamidomethyl@17		Q20170801-09	84.2969	69	2.1e-08	1	115	12784.2	HUMAN	60S ribosomal protein L30
[343]		P62888	RL30_HUMAN	2	27	3.6	2.1e-08	642.843	2	56537	-0.38	VCTL	AIIDPGDSDIIR			Q20170801-09	153.96	95	0.0013	1	115	12784.2	HUMAN	60S ribosomal protein L30
[344]		Q15366	PCBP2_HUMAN	1	4.9	4.58	5.4e-09	610.991	3	273629	1.9	VTLR	LVVPASQCGSLIGKGGCK	Carbamidomethyl@8;Carbamidomethyl@17		Q20170801-09	123.781	102	5.4e-09	1	365	38580.4	HUMAN	Poly(rC)-binding protein 2
[345]		Q9C0E8	LNP_HUMAN	1	3	4.56	7.8e-08	677.888	2	174399	0.048	PPER	TVTPALSSNVLPR			Q20170801-07	150.361	211	7.8e-08	1	428	47740.3	HUMAN	Protein lunapark
[346]		Q9NZN5	ARHGC_HUMAN	1	0.8	4.53	8e-11	699.821	2	38693	1.5	MPFR	TGTGDIATCYSPR	Carbamidomethyl@9		Q20170801-09	99.4565	1317	8e-11	1	1544	173234	HUMAN	Rho guanine nucleotide exchange factor 12
[347]		P33316	DUT_HUMAN	2	7.9	3.6	8.5e-07	457.251	3	1220000	0.24	PSKR	ARPAEVGGMQLR		Abu@N-term	Q20170801-07	98.3654	104	8.5e-07	1	252	26563.5	HUMAN	Deoxyuridine 5'-triphosphate nucleotidohydrolase, mitochondrial
[347]		P33316	DUT_HUMAN	2	7.9	3.6	8.5e-07	350.538	3	227179	0.84	LFNF	GKEKFEVK		Abu@N-term	Q20170801-09	50.301	205	0.0056	1	252	26563.5	HUMAN	Deoxyuridine 5'-triphosphate nucleotidohydrolase, mitochondrial
[348]		O00425	IF2B3_HUMAN	1	2.8	4.52	5.5e-10	929.919	2	237443	-0.27	FLVK	TGYAFVDCPDESWALK	Carbamidomethyl@8		Q20170801-09	183.779	37	5.5e-10	1	579	63705.6	HUMAN	Insulin-like growth factor 2 mRNA-binding protein 3
[349]		P28370	SMCA1_HUMAN	2	1.6	2.47	7.1e-06	352.185	3	503634	-1.4	QMIR	HGATHVFASK			Q20170801-09	23.3352	671	7.1e-06	2	1054	122606	HUMAN	Probable global transcription activator SNF2L1
[349]		P28370	SMCA1_HUMAN	2	1.6	2.47	7.1e-06	441.709	2	145882	-2.3	IKSR	TAMEFQR			Q20170801-09	65.0461	1008	4.4e-05	1	1054	122606	HUMAN	Probable global transcription activator SNF2L1
[349-1]	1	O60264	SMCA5_HUMAN	2	1.6	2.47	7.1e-06	352.185	3	503634	-1.4	QMIR	HGATHVFASK			Q20170801-09	23.3352	656	7.1e-06	2	1052	121906	HUMAN	SWI/SNF-related matrix-associated actin-dependent regulator of chromatin subfamily A member 5
[349-1]	1	O60264	SMCA5_HUMAN	2	1.6	2.47	7.1e-06	424.718	2	340291	-0.37	LKSR	TAMELQR			Q20170801-09	52.8712	993	0.0051	1	1052	121906	HUMAN	SWI/SNF-related matrix-associated actin-dependent regulator of chromatin subfamily A member 5
[350]		P61019	RAB2A_HUMAN	1	6.6	4.5	5.7e-09	747.877	2	152481	1.6	TSAK	TASNVEEAFINTAK			Q20170801-09	149.097	152	5.7e-09	1	212	23545.8	HUMAN	Ras-related protein Rab-2A
[351]		Q9NZ01	TECR_HUMAN	1	2.9	4.5	4.2e-10	578.288	2	265980	-1.5	LFTK	THPQWYPAR			Q20170801-09	80.6856	39	4.2e-10	1	308	36034.7	HUMAN	Very-long-chain enoyl-CoA reductase
[352]		Q13423	NNTM_HUMAN	2	1.7	3.44	4.4e-08	615.83	2	430237	0.49	SQRK	TTVLAMDQVPR			Q20170801-09	137.746	172	4.4e-08	1	1086	113897	HUMAN	NAD(P) transhydrogenase, mitochondrial
[352]		Q13423	NNTM_HUMAN	2	1.7	3.44	4.4e-08	367.205	2	154005	-0.68	GAAK	SMGAIVR			Q20170801-09	59.0801	248	0.0012	1	1086	113897	HUMAN	NAD(P) transhydrogenase, mitochondrial
[353]		O00410	IPO5_HUMAN	2	2.3	2.82	1.1e-07	815.916	2	141608	-3.1	DGVR	VAAAESMPLLLECAR	Carbamidomethyl@13		Q20170801-09	181.113	721	1.1e-07	1	1097	123631	HUMAN	Importin-5
[353]		O00410	IPO5_HUMAN	2	2.3	2.82	1.1e-07	696.328	2	87032	3.5	KEHI	MQMLQNPDWK		Abu@N-term;Oxidation@1|3	Q20170801-09	98.0771	364	1.5e-05	1	1097	123631	HUMAN	Importin-5
[354]		O60216	RAD21_HUMAN	2	3.6	3.61	1.8e-08	724.871	2	137875	-4.6	ALAK	TGAESISLLELCR	Carbamidomethyl@12		Q20170801-09	176.046	574	1.8e-08	1	631	71690.1	HUMAN	Double-strand-break repair protein rad21 homolog
[354]		O60216	RAD21_HUMAN	2	3.6	3.61	1.8e-08	404.549	3	346869	-0.12	WNKR	TQQMLHGLQR			Q20170801-09	74.8129	560	0.0022	1	631	71690.1	HUMAN	Double-strand-break repair protein rad21 homolog
[355]		Q86XP3	DDX42_HUMAN	1	1.4	4.46	4.6e-10	644.812	2	56318	-0.8	QSHS	AFGATSSSSGFGK		Abu@N-term	Q20170801-09	99.992	38	4.6e-10	1	938	102976	HUMAN	ATP-dependent RNA helicase DDX42
[356]		Q9UIG0	BAZ1B_HUMAN	1	0.9	4.43	6.3e-09	680.342	2	148942	0.7	KKSK	TDNSSLSSPLNPK			Q20170801-09	97.7339	323	6.3e-09	1	1483	170904	HUMAN	Tyrosine-protein kinase BAZ1B
[357]		P60660	MYL6_HUMAN	2	10.6	3.52	7.9e-10	671.317	2	85335	-1.1	GDGK	ILYSQCGDVMR	Carbamidomethyl@6		Q20170801-09	118.872	27	7.9e-10	2	151	16930.2	HUMAN	Myosin light polypeptide 6
[357]		P60660	MYL6_HUMAN	2	10.6	3.52	7.9e-10	600.62	3	214366	2.1	LFDR	TGDGKILYSQCGDVMR	Carbamidomethyl@11		Q20170801-09	116.743	22	6e-05	1	151	16930.2	HUMAN	Myosin light polypeptide 6
[358]		O15371	EIF3D_HUMAN	2	2.9	2.2	3.2e-06	510.741	2	315451	0.93	INIK	TLNEWDSR			Q20170801-09	82.2971	395	3.2e-06	1	548	63973.3	HUMAN	Eukaryotic translation initiation factor 3 subunit D
[358]		O15371	EIF3D_HUMAN	2	2.9	2.2	3.2e-06	522.229	2	82023	2.2	WDSR	HCNGVDWR	Carbamidomethyl@2		Q20170801-09	49.6724	403	3.2e-06	1	548	63973.3	HUMAN	Eukaryotic translation initiation factor 3 subunit D
[359]		Q13724	MOGS_HUMAN	1	1.3	4.39	1.3e-08	617.309	2	581415	0.13	LNPK	TLPSGLDDYPR			Q20170801-09	134.657	577	1.3e-08	1	837	91918.3	HUMAN	Mannosyl-oligosaccharide glucosidase
[360]		P15311	EZRI_HUMAN	1	2	4.39	4.5e-10	374.178	4	271232	-0.93	ENKR	THNDIIHNENMR			Q20170801-09	55.0574	548	4.5e-10	1	586	69413.4	HUMAN	Ezrin
[361]		Q8N1B4	VPS52_HUMAN	1	1.7	4.38	3e-08	674.338	2	166969	-0.15	SEIR	TLQEQSGAMNIR			Q20170801-09	95.9736	146	3e-08	1	723	82221.9	HUMAN	Vacuolar protein sorting-associated protein 52 homolog
[362]		Q12931	TRAP1_HUMAN	1	1.6	4.34	8.2e-09	457.584	3	509884	3.5	IVAR	SLYSEKEVFIR			Q20170801-09	137.061	104	8.2e-09	1	704	80110.7	HUMAN	Heat shock protein 75 kDa, mitochondrial
[363]		P60866	RS20_HUMAN	2	16	2.91	4.4e-07	416.829	5	264928	-0.082	-M	AFKDTGKTPVEPEVAIHR		Abu@N-term	Q20170801-07	114.862	2	4.4e-07	1	119	13372.8	HUMAN	40S ribosomal protein S20
[363]		P60866	RS20_HUMAN	2	16	2.91	4.4e-07	510.025	4	407751	0.3	-	MAFKDTGKTPVEPEVAIHR		Met-loss+Acetyl@1	Q20170801-09	133.413	1	4.9e-05	1	119	13372.8	HUMAN	40S ribosomal protein S20
[364]		Q8N1G4	LRC47_HUMAN	1	1.9	4.31	7.3e-09	592.325	2	78744	-0.53	CEKR	TAATLATHELR			Q20170801-09	76.737	371	7.3e-09	1	583	63473.5	HUMAN	Leucine-rich repeat-containing protein 47
[365]		O95721	SNP29_HUMAN	1	3.9	4.31	5.4e-09	654.321	2	128559	0.51	RTEK	MVDKMDQDLK		Abu@N-term	Q20170801-09	92.5654	94	5.4e-09	1	258	28970.6	HUMAN	Synaptosomal-associated protein 29
[366]		Q9ULP9	TBC24_HUMAN	1	2.7	4.3	5.3e-08	776.398	2	108133	-0.78	IPCR	TVTPDASVYSDIVGK			Q20170801-09	161.377	66	5.3e-08	1	559	62920.1	HUMAN	TBC1 domain family member 24
[367]		P33993	MCM7_HUMAN	3	5.7	1.6	9.2e-06	717.346	2	100	0.94	GMVR	SPQNQYPAELMR			Q20170801-09	125.867	121	9.2e-06	1	719	81308.7	HUMAN	DNA replication licensing factor MCM7
[367]		P33993	MCM7_HUMAN	3	5.7	1.6	9.2e-06	600.317	3	215798	-0.67	EADR	TAIHEVMEQQTISIAK			Q20170801-09	142.246	456	1.3e-05	1	719	81308.7	HUMAN	DNA replication licensing factor MCM7
[367]		P33993	MCM7_HUMAN	3	5.7	1.6	9.2e-06	491.944	3	706636	0.64	QTAR	TQRPADVIFATVR			Q20170801-09	151.39	654	6.9e-05	1	719	81308.7	HUMAN	DNA replication licensing factor MCM7
[368]		Q9UFN0	NPS3A_HUMAN	1	6.1	4.25	1.4e-08	635.649	3	393553	2.3	CSSF	ATGPRQYDGIFYEFR		Abu@N-term	Q20170801-09	173.975	26	1.4e-08	1	247	28466.9	HUMAN	Protein NipSnap homolog 3A
[369]		P40926	MDHM_HUMAN	1	3.6	4.23	2.2e-07	685.889	2	727547	-0.064	HAGK	TIIPLISQCTPK	Carbamidomethyl@9		Q20170801-09	167.276	204	2.2e-07	1	338	35503.6	HUMAN	Malate dehydrogenase, mitochondrial
[370]		Q29RF7	PDS5A_HUMAN	1	1	4.23	4.9e-08	665.851	2	140501	-1	GKKR	TVTAAGAENIQQK			Q20170801-09	62.7028	1240	4.9e-08	1	1337	150832	HUMAN	Sister chromatid cohesion protein PDS5 homolog A
[371]		Q6UWP7	LCLT1_HUMAN	1	2.4	4.19	2.7e-09	571.796	2	390795	0.63	LHPR	TTGFTFVVDR			Q20170801-09	156.941	235	2.7e-09	1	414	48920.7	HUMAN	Lysocardiolipin acyltransferase 1
[372]		Q6UB35	C1TM_HUMAN	2	3	2.3	1.6e-06	511.288	2	627777	1.1	DKIR	TIAQAVYGAK			Q20170801-09	90.5128	871	1.6e-06	1	978	105791	HUMAN	Monofunctional C1-tetrahydrofolate synthase, mitochondrial
[372]		Q6UB35	C1TM_HUMAN	2	3	2.3	1.6e-06	567.618	3	132532	-1.9	PCRA	SSGGGGGGGGGREGLLGQR		Abu@N-term	Q20170801-07	61.7065	32	2.7e-06	1	978	105791	HUMAN	Monofunctional C1-tetrahydrofolate synthase, mitochondrial
[373]		Q14318	FKBP8_HUMAN	1	3.9	4.18	8e-09	866.414	2	86295	-0.96	VTLK	TAVDGPDLEMLTGQER			Q20170801-07	174.302	202	8e-09	1	412	44562.1	HUMAN	Peptidyl-prolyl cis-trans isomerase FKBP8
[374]		P46940	IQGA1_HUMAN	3	1.8	2.67	1.1e-06	777.421	2	264969	-1.1	DDYK	TLINAEDPPMVVVR			Q20170801-09	172.061	857	1.1e-06	1	1657	189254	HUMAN	Ras GTPase-activating-like protein IQGAP1
[374]		P46940	IQGA1_HUMAN	3	1.8	2.67	1.1e-06	511.253	2	413183	-0.27	SYIK	TCLDNLASK	Carbamidomethyl@2		Q20170801-09	78.6597	1533	0.00045	1	1657	189254	HUMAN	Ras GTPase-activating-like protein IQGAP1
[374]		P46940	IQGA1_HUMAN	3	1.8	2.67	1.1e-06	401.755	2	540384	0.18	MDAR	TILLNTK			Q20170801-09	82.5467	1383	0.036	1	1657	189254	HUMAN	Ras GTPase-activating-like protein IQGAP1
[375]		Q96M27	PRRC1_HUMAN	1	3.4	4.17	9e-09	768.376	2	257920	-2.4	RITR	GQDEASAGGIWGFIK			Q20170801-09	188.501	204	9e-09	1	445	46701.6	HUMAN	Protein PRRC1
[376]		Q9ULT8	HECD1_HUMAN	2	0.8	2.23	4.7e-06	437.551	3	182285	1.4	GRRR	TWDDDYVLKR			Q20170801-09	128.92	1760	4.7e-06	1	2610	289387	HUMAN	E3 ubiquitin-protein ligase HECTD1
[376]		Q9ULT8	HECD1_HUMAN	2	0.8	2.23	4.7e-06	618.293	2	65793	0.011	NIAR	TNATNNMNLSR			Q20170801-09	56.1937	1558	1.7e-05	1	2610	289387	HUMAN	E3 ubiquitin-protein ligase HECTD1
[377]		P62273	RS29_HUMAN	2	21.4	2.39	1.2e-05	470.234	3	285482	1	-	MGHQQLYWSHPR		Met-loss@1	Q20170801-09	73.9077	1	1.2e-05	1	56	6676.8	HUMAN	40S ribosomal protein S29
[377]		P62273	RS29_HUMAN	2	21.4	2.39	1.2e-05	374.19	4	955640	-0.39	-M	GHQQLYWSHPR		Abu@N-term	Q20170801-09	78.0214	2	0.00017	1	56	6676.8	HUMAN	40S ribosomal protein S29
[378]		Q9Y613	FHOD1_HUMAN	2	1.6	3.67	3.5e-08	669.864	2	223361	0.64	PAAR	TPQSPAPCVLLR	Carbamidomethyl@8		Q20170801-09	139.272	495	3.5e-08	1	1164	126552	HUMAN	FH1/FH2 domain-containing protein 1
[378]		Q9Y613	FHOD1_HUMAN	2	1.6	3.67	3.5e-08	425.737	2	62895	0.5	TQLV	LYENALK			Q20170801-09	59.9653	329	0.033	1	1164	126552	HUMAN	FH1/FH2 domain-containing protein 1
[379]		P17081	RHOQ_HUMAN	1	4.9	4.12	7.8e-09	599.792	2	528402	-0.015	GACC	YVECSALTQK	Carbamidomethyl@4		Q20170801-09	76.0222	160	7.8e-09	2	205	22659.7	HUMAN	Rho-related GTP-binding protein RhoQ
[380]		Q86UE4	LYRIC_HUMAN	2	5.5	2.94	1.7e-07	680.371	2	788933	-1.3	FSLK	TISTSDPAEVLVK			Q20170801-09	145.444	492	1.7e-07	1	582	63837.4	HUMAN	Protein LYRIC
[380]		Q86UE4	LYRIC_HUMAN	2	5.5	2.94	1.7e-07	658.018	3	110301	1.7	PNGR	TVEVAEGEAVRTPQSVTAK			Q20170801-09	111.206	132	0.00031	1	582	63837.4	HUMAN	Protein LYRIC
[381]		P58107	EPIPL_HUMAN	1	0.3	4.09	3e-09	768.388	2	65502	-2.8	QGTK	TLQEVTEMDSVKR			Q20170801-09	111.68	2740	3e-09	1	5090	555625	HUMAN	Epiplakin
[382]		Q12906	ILF3_HUMAN	1	2.6	4.05	3.5e-10	668.566	4	111118	-0.56	VMAK	HSSVYPTQEELEAVQNMVSHTER			Q20170801-09	183.468	18	3.5e-10	1	894	95339.2	HUMAN	Interleukin enhancer-binding factor 3
[383]		Q9NVI7	ATD3A_HUMAN	2	4.6	2.4	5.4e-07	578.292	2	235415	-1.9	ESIR	TAGTLFGEGFR			Q20170801-09	154.006	276	5.4e-07	2	634	71369.8	HUMAN	ATPase family AAA domain-containing protein 3A
[383]		Q9NVI7	ATD3A_HUMAN	2	4.6	2.4	5.4e-07	658.633	3	350472	0.2	HQQK	MCWLKAEGPGRGDEPSPS	Carbamidomethyl@2		Q20170801-09	132.974	617	1.4e-05	1	634	71369.8	HUMAN	ATPase family AAA domain-containing protein 3A
[384]		Q15042	RB3GP_HUMAN	2	2	2.23	3.2e-06	406.228	3	388486	-0.43	FILR	TTVPRPAPYSK			Q20170801-09	62.3348	943	3.2e-06	1	981	110525	HUMAN	Rab3 GTPase-activating protein catalytic subunit
[384]		Q15042	RB3GP_HUMAN	2	2	2.23	3.2e-06	383.191	3	132298	2	PGVR	TDFEMVHLR			Q20170801-09	136.694	188	2e-05	1	981	110525	HUMAN	Rab3 GTPase-activating protein catalytic subunit
[385]		P13807	GYS1_HUMAN	1	2	4.02	2.2e-08	555.99	3	402109	1.5	QGVR	TQVELLEAPTPALKR			Q20170801-09	153.175	75	2.2e-08	1	737	83786.3	HUMAN	Glycogen [starch] synthase, muscle
[386]		P0DMM9	ST1A3_HUMAN	1	3.4	4.01	3e-09	583.793	2	920810	-0.51	GDWK	TTFTVAQNER			Q20170801-09	74.4402	266	3e-09	4	295	34196.5	HUMAN	Sulfotransferase 1A3
[387]		Q9NQG6	MID51_HUMAN	1	2.6	4.01	3.1e-09	780.846	2	84053	-3.5	SGKR	SWEEPNWMGSPR		Abu@N-term	Q20170801-09	169.499	70	3.1e-09	1	463	51293.6	HUMAN	Mitochondrial dynamics protein MID51
[388]		P48163	MAOX_HUMAN	1	2.8	4	5.7e-08	617.321	3	125766	2.9	YQEK	TATVYPEPQNKEAFVR			Q20170801-09	117.308	526	5.7e-08	1	572	64150.2	HUMAN	NADP-dependent malic enzyme
[389]		P16435	NCPR_HUMAN	1	1.5	4	7.9e-10	399.85	3	267898	0.022	LGNK	TYEHFNAMGK			Q20170801-09	74.7232	177	7.9e-10	1	677	76690.4	HUMAN	NADPH--cytochrome P450 reductase
[390]		P24534	EF1B_HUMAN	1	5.8	3.96	5.4e-09	674.35	2	63612	2.1	ECVR	SIQADGLVWGSSK			Q20170801-09	151.768	164	5.4e-09	1	225	24763.9	HUMAN	Elongation factor 1-beta
[391]		Q9NT62	ATG3_HUMAN	1	4.1	3.96	6e-08	673.831	2	74304	-0.39	CKAK	TDAGGEDAILQTR			Q20170801-09	105.397	186	6e-08	1	314	35864.7	HUMAN	Ubiquitin-like-conjugating enzyme ATG3
[392]		Q02978	M2OM_HUMAN	1	5.4	3.96	1.4e-08	721.373	2	76058	0.099	-	MAATASAGAGGIDGKPR		Met-loss+Acetyl@1	Q20170801-09	79.3952	1	1.4e-08	1	314	34062	HUMAN	Mitochondrial 2-oxoglutarate/malate carrier protein
[393]		P05067	A4_HUMAN	1	1.3	3.95	1.1e-08	422.897	3	469367	0.59	KQCK	THPHFVIPYR			Q20170801-09	117.316	107	1.1e-08	1	770	86944	HUMAN	Amyloid beta A4 protein
[394]		Q9UJU6	DBNL_HUMAN	1	2.6	3.93	5.9e-08	695.341	2	86217	-1.3	SPQR	TWEQQQEVVSR			Q20170801-09	92.6582	236	5.9e-08	1	430	48207.7	HUMAN	Drebrin-like protein
[395]		P16422	EPCAM_HUMAN	1	3.2	3.93	5.8e-09	387.559	3	305167	-0.33	KSLR	TALQKEITTR			Q20170801-09	63.3864	164	5.8e-09	1	314	34932.6	HUMAN	Epithelial cell adhesion molecule
[396]		Q9HCC0	MCCB_HUMAN	1	2	3.93	3.1e-09	645.312	2	192216	-2.1	HFGR	TFYNQAIMSSK			Q20170801-09	125.964	194	3.1e-09	1	563	61333.7	HUMAN	Methylcrotonoyl-CoA carboxylase beta chain, mitochondrial
[397]		Q99536	VAT1_HUMAN	2	8.4	2.9	4.9e-08	643.033	3	191352	-1.7	DKVK	LQSRPAAPPAPGPGQLTLR			Q20170801-09	135.763	64	4.9e-08	1	393	41920.6	HUMAN	Synaptic vesicle membrane protein VAT-1 homolog
[397]		Q99536	VAT1_HUMAN	2	8.4	2.9	4.9e-08	778.907	2	123200	-4.9	PLLR	CLVLTGFGGYDKVK	Carbamidomethyl@1		Q20170801-09	161.807	50	0.00016	1	393	41920.6	HUMAN	Synaptic vesicle membrane protein VAT-1 homolog
[398]		Q13618	CUL3_HUMAN	1	1.4	3.9	9.7e-10	719.284	2	139002	-1.4	NGLK	TMCECMSSYLR	Carbamidomethyl@3;Carbamidomethyl@5		Q20170801-09	145.631	312	9.7e-10	1	768	88931	HUMAN	Cullin-3
[399]		P55011	S12A2_HUMAN	1	1	3.89	1.3e-07	673.321	2	72908	1.8	YYLR	TFGHNTMDAVPR			Q20170801-09	96.5023	212	1.3e-07	1	1212	131448	HUMAN	Solute carrier family 12 member 2
[400]		P52272	HNRPM_HUMAN	2	4.2	2.6	1.4e-07	678.99	3	64519	0.66	EMER	GNFGGSFAGSFGGAGGHAPGVAR			Q20170801-09	150.884	628	1.4e-07	1	730	77516.4	HUMAN	Heterogeneous nuclear ribonucleoprotein M
[400]		P52272	HNRPM_HUMAN	2	4.2	2.6	1.4e-07	439.214	2	45318	1.5	GLER	MGANSLER			Q20170801-09	48.456	571	4e-05	1	730	77516.4	HUMAN	Heterogeneous nuclear ribonucleoprotein M
[401]		Q8IXH7	NELFD_HUMAN	2	3.1	2.39	6.2e-08	882.42	2	51374	-4.6	LFAQ	AMMSVLAQEEQGGSAVR			Q20170801-09	150.804	243	6.2e-08	1	590	66247.2	HUMAN	Negative elongation factor C/D
[401]		Q8IXH7	NELFD_HUMAN	2	3.1	2.39	6.2e-08	640.652	3	287465	0.029	LFAQ	AMMSVLAQEEQGGSAVRR			Q20170801-09	134.35	243	3.6e-06	1	590	66247.2	HUMAN	Negative elongation factor C/D
[402]		P13073	COX41_HUMAN	1	7.1	3.83	2.1e-08	715.815	2	162887	-1.9	SVVK	SEDFSLPAYMDR			Q20170801-09	171.294	30	2.1e-08	1	169	19576.9	HUMAN	Cytochrome c oxidase subunit 4 isoform 1, mitochondrial
[403]		Q8N1G2	CMTR1_HUMAN	1	1.4	3.76	8.7e-09	698.832	2	103695	-0.6	YIVR	TVNEPWTMGFSK			Q20170801-09	166.222	753	8.7e-09	1	835	95321.6	HUMAN	Cap-specific mRNA (nucleoside-2'-O-)-methyltransferase 1
[404]		P46778	RL21_HUMAN	1	6.9	3.76	2e-09	622.338	2	207429	5.1	PFRK	HGVVPLATYMR			Q20170801-09	136.471	22	2e-09	1	160	18565	HUMAN	60S ribosomal protein L21
[405]		O60282	KIF5C_HUMAN	1	1.3	3.75	6.3e-08	580.793	2	186685	0.4	KVSK	TGAEGAVLDEAK			Q20170801-09	85.6425	242	6.3e-08	3	957	109496	HUMAN	Kinesin heavy chain isoform 5C
[406]		P09669	COX6C_HUMAN	1	13.3	3.74	4.4e-09	408.238	3	381170	0.31	-	MAPEVLPKPR		Abu@N-term	Q20170801-09	106.598	1	4.4e-09	1	75	8781.5	HUMAN	Cytochrome c oxidase subunit 6C
[407]		Q96J02	ITCH_HUMAN	1	1.4	3.73	1.2e-08	525.615	3	721216	0.5	HFTR	TTTWQRPTLESVR			Q20170801-09	123.736	383	1.2e-08	1	903	102804	HUMAN	E3 ubiquitin-protein ligase Itchy homolog
[408]		P00367	DHE3_HUMAN	2	4.5	2.16	2.2e-06	608.952	3	233380	1.6	RRHY	SEAVADREDDPNFFK		Abu@N-term	Q20170801-09	125.356	54	2.2e-06	1	558	61398.4	HUMAN	Glutamate dehydrogenase 1, mitochondrial
[408]		P00367	DHE3_HUMAN	2	4.5	2.16	2.2e-06	540.292	2	277871	2.6	LDLR	TAAYVNAIEK			Q20170801-09	91.6392	536	3.4e-05	2	558	61398.4	HUMAN	Glutamate dehydrogenase 1, mitochondrial
[409]		P31939	PUR9_HUMAN	2	3.2	2.86	1.4e-06	582.324	2	359824	-0.85	DLYK	TLTPISAAYAR			Q20170801-09	127.499	295	1.4e-06	1	592	64616.4	HUMAN	Bifunctional purine biosynthesis protein PURH
[409]		P31939	PUR9_HUMAN	2	3.2	2.86	1.4e-06	446.748	2	228485	-0.18	VSDK	TGLVEFAR			Q20170801-09	119.89	15	0.0087	1	592	64616.4	HUMAN	Bifunctional purine biosynthesis protein PURH
[410]		P35998	PRS7_HUMAN	1	2.8	3.67	2.6e-09	671.321	2	72585	3.5	AEIR	SVCTEAGMFAIR	Carbamidomethyl@3		Q20170801-09	157.609	387	2.6e-09	1	433	48634.3	HUMAN	26S proteasome regulatory subunit 7
[411]		P51946	CCNH_HUMAN	1	3.7	3.67	3.4e-09	745.853	2	65108	-2.8	SQKR	HWTFSSEEQLAR			Q20170801-09	135.23	10	3.4e-09	1	323	37643.8	HUMAN	Cyclin-H
[412]		O60832	DKC1_HUMAN	1	3.1	3.64	1.1e-08	605.976	3	180032	-1.5	LNVR	TTHYTPLACGSNPLKR	Carbamidomethyl@9		Q20170801-09	105.429	66	1.1e-08	1	514	57674.6	HUMAN	H/ACA ribonucleoprotein complex subunit 4
[413]		P54136	SYRC_HUMAN	1	2.7	3.63	2.3e-09	654.31	3	35931	-5	TIVK	SDGGYTYDTSDLAAIKQR			Q20170801-09	139.542	378	2.3e-09	1	660	75379.7	HUMAN	Arginine--tRNA ligase, cytoplasmic
[414]		Q96PU5	NED4L_HUMAN	1	1.2	3.63	5.1e-07	688.339	2	177255	0.84	PGSR	TSPQELSEELSR			Q20170801-09	133.869	302	5.1e-07	1	975	111933	HUMAN	E3 ubiquitin-protein ligase NEDD4-like
[415]		Q7Z7L1	SLN11_HUMAN	1	1.2	3.63	1e-08	632.784	2	184152	0.97	IFVK	SWSSGPFPEDR			Q20170801-09	131.099	109	1e-08	1	901	102836	HUMAN	Schlafen family member 11
[416]		P61106	RAB14_HUMAN	1	7	3.62	9.1e-09	541.276	3	208101	3.5	ASAK	TGENVEDAFLEAAKK			Q20170801-09	156.741	157	9.1e-09	1	215	23897.2	HUMAN	Ras-related protein Rab-14
[417]		Q14690	RRP5_HUMAN	1	1.1	3.6	3e-09	660.71	3	71836	1.8	LTLK	TTEPGVTGLLLAVEGPAAKR			Q20170801-09	187.886	982	3e-09	1	1871	208702	HUMAN	Protein RRP5 homolog
[418]		Q9H4I3	TRABD_HUMAN	1	3.2	3.59	1.2e-07	638.328	2	199465	-3.6	NLPR	TVTQLVAEDGSR			Q20170801-09	98.0894	63	1.2e-07	1	376	42321.5	HUMAN	TraB domain-containing protein
[419]		Q15334	L2GL1_HUMAN	1	1.4	3.58	9.5e-09	589.623	3	292678	3.5	VFTR	HGQGFYLISPSEFER			Q20170801-09	178.466	920	9.5e-09	1	1064	115419	HUMAN	Lethal(2) giant larvae protein homolog 1
[420]		Q9HD20	AT131_HUMAN	1	1	3.55	6.5e-09	620.868	2	111864	2.2	CEWR	SIDGSIVLPLAR			Q20170801-09	178.273	786	6.5e-09	1	1204	132956	HUMAN	Manganese-transporting ATPase 13A1
[421]		Q5JRA6	MIA3_HUMAN	1	0.7	3.5	1.8e-07	716.881	2	272507	1.8	DVSR	TQTAISVVEEDLK			Q20170801-09	170.799	1460	1.8e-07	1	1907	213704	HUMAN	Melanoma inhibitory activity protein 3
[422]		Q92990	GLMN_HUMAN	1	2.9	3.5	5.4e-09	721.638	3	103368	0.26	PVPY	SKEQIQMDDYGLCQCCK	Carbamidomethyl@13;Carbamidomethyl@15;Carbamidomethyl@16		Q20170801-09	124.297	162	5.4e-09	1	594	68208.9	HUMAN	Glomulin
[423]		Q96DG6	CMBL_HUMAN	1	4.9	3.5	2.2e-08	458.562	3	118541	-0.24	YQIK	TFSGQTHGFVHR			Q20170801-09	68.0498	206	2.2e-08	1	245	28048.4	HUMAN	Carboxymethylenebutenolidase homolog
[424]		Q9UHD8	SEPT9_HUMAN	2	4.9	3.17	4.6e-08	687.009	3	73081	2.2	ALKR	SFEVEEVETPNSTPPRR		Abu@N-term	Q20170801-09	132.555	30	4.6e-08	1	586	65402	HUMAN	Septin-9
[424]		Q9UHD8	SEPT9_HUMAN	2	4.9	3.17	4.6e-08	689.897	2	459405	5	RRTE	ITIVKPQESAHR			Q20170801-09	167.319	152	0.009	1	586	65402	HUMAN	Septin-9
[425]		Q9NPF4	OSGEP_HUMAN	1	5.1	3.45	7.5e-08	875.443	2	61057	-0.52	NPRR	TYVTPPGTGFLPGDTAR			Q20170801-09	168.034	31	7.5e-08	1	335	36427.2	HUMAN	Probable tRNA N6-adenosine threonylcarbamoyltransferase
[426]		Q9Y4P3	TBL2_HUMAN	1	3.1	3.44	1.6e-08	498.237	3	203039	0.24	YLLK	TGRFEEAAGAAPCR	Carbamidomethyl@13		Q20170801-09	72.0784	323	1.6e-08	1	447	49798.3	HUMAN	Transducin beta-like protein 2
[427]		Q8TEQ6	GEMI5_HUMAN	2	1.7	2.24	7.4e-07	731.349	2	72036	-3	QEPR	TLPPSPNWYCAR	Carbamidomethyl@10		Q20170801-09	152.318	7	7.4e-07	1	1508	168591	HUMAN	Gem-associated protein 5
[427]		Q8TEQ6	GEMI5_HUMAN	2	1.7	2.24	7.4e-07	795.413	2	74546	-1.1	NSQR	TVAEVQETLAEMIR			Q20170801-09	196.108	1373	6.6e-05	1	1508	168591	HUMAN	Gem-associated protein 5
[428]		Q96GW9	SYMM_HUMAN	1	2.5	3.39	9.6e-09	791.344	2	100	0.37	PRYY	SSGSLSAGDDACDVR	Carbamidomethyl@12	Abu@N-term	Q20170801-09	78.952	30	9.6e-09	1	593	66591.5	HUMAN	Methionine--tRNA ligase, mitochondrial
[429]		Q13190	STX5_HUMAN	1	2.5	3.38	5e-08	542.26	2	192321	-0.83	CRDR	TQEFLSACK	Carbamidomethyl@8		Q20170801-09	81.8179	61	5e-08	1	355	39672.9	HUMAN	Syntaxin-5
[430]		P25789	PSA4_HUMAN	1	3.4	3.36	1.1e-08	504.262	2	153367	1.5	YDSR	TTIFSPEGR			Q20170801-07	102.063	9	1.1e-08	1	261	29484.1	HUMAN	Proteasome subunit alpha type-4
[431]		Q6PI48	SYDM_HUMAN	1	1.4	3.36	1e-07	510.264	2	140073	2.1	IKVK	TAELLNACK	Carbamidomethyl@8		Q20170801-09	73.7993	145	1e-07	1	645	73563.3	HUMAN	Aspartate--tRNA ligase, mitochondrial
[432]		Q9Y6Y8	S23IP_HUMAN	1	1.1	3.33	7.3e-09	641.297	2	78330	-2.6	EIYR	TMNISPEQPQH			Q20170801-09	84.515	990	7.3e-09	1	1000	111077	HUMAN	SEC23-interacting protein
[433]		Q96GG9	DCNL1_HUMAN	1	4.6	3.33	2e-08	704.832	2	119102	3.4	SSEK	TAVSCLSQNDWK	Carbamidomethyl@5		Q20170801-09	121.183	25	2e-08	1	259	30124.6	HUMAN	DCN1-like protein 1
[434]		P28072	PSB6_HUMAN	1	4.2	3.33	6e-08	542.275	2	198999	0.52	ADSR	TTTGSYIANR			Q20170801-09	52.0032	54	6e-08	1	239	25358	HUMAN	Proteasome subunit beta type-6
[435]		O76080	ZFAN5_HUMAN	1	6.6	3.33	3.9e-08	852.867	2	72717	-1.2	TPGP	MLCSTGCGFYGNPR	Carbamidomethyl@3;Carbamidomethyl@7	Abu@N-term	Q20170801-09	140.067	12	3.9e-08	2	213	23132.3	HUMAN	AN1-type zinc finger protein 5
[436]		P46060	RAGP1_HUMAN	1	2.2	3.31	7.1e-07	440.914	3	311163	0.2	TLAK	TQVAGGQLSFKGK			Q20170801-09	82.8231	16	7.1e-07	1	587	63542.5	HUMAN	Ran GTPase-activating protein 1
[437]		O60271	JIP4_HUMAN	1	1	3.31	1.2e-07	478.26	3	483849	0.082	VKKR	SSTLSQLPGDKSK		Abu@N-term	Q20170801-09	71.8857	593	1.2e-07	1	1321	146207	HUMAN	C-Jun-amino-terminal kinase-interacting protein 4
[438]		Q9H857	NT5D2_HUMAN	1	2.1	3.31	6.1e-07	419.885	3	423665	-0.56	GCMK	TPFLGDMAHIR			Q20170801-09	153.093	510	6.1e-07	1	520	60719.2	HUMAN	5'-nucleotidase domain-containing protein 2
[439]		Q7Z4H8	KDEL2_HUMAN	1	2.2	3.29	1.9e-07	590.838	2	206034	0.61	LVAA	GAPEVLVSAPR		Abu@N-term	Q20170801-07	128.978	21	1.9e-07	1	507	58573	HUMAN	KDEL motif-containing protein 2
[440]		Q9NQH7	XPP3_HUMAN	2	1.8	2.31	2.2e-06	505.785	2	1270000	0.23	QRRY	SLQPVPER		Abu@N-term	Q20170801-07	82.9288	32	2.2e-06	1	507	57034.1	HUMAN	Probable Xaa-Pro aminopeptidase 3
[440]		Q9NQH7	XPP3_HUMAN	2	1.8	2.31	2.2e-06	389.559	3	324787	-1.1	QRRY	SLQPVPERR		Abu@N-term	Q20170801-09	63.8661	32	0.00045	1	507	57034.1	HUMAN	Probable Xaa-Pro aminopeptidase 3
[441]		P23284	PPIB_HUMAN	2	9.3	2.29	6.9e-07	682.858	2	158774	1.8	TVPK	TVDNFVALATGEK			Q20170801-09	168.781	72	6.9e-07	1	216	23742.7	HUMAN	Peptidyl-prolyl cis-trans isomerase B
[441]		P23284	PPIB_HUMAN	2	9.3	2.29	6.9e-07	395.709	2	116697	1.2	TTVK	TAWLDGK			Q20170801-09	82.9464	159	0.00018	1	216	23742.7	HUMAN	Peptidyl-prolyl cis-trans isomerase B
[442]		P14625	ENPL_HUMAN	4	5.2	1.43	1.5e-05	438.732	2	379208	0.15	SQKK	TFEINPR			Q20170801-07	94.2876	684	1.5e-05	2	803	92469.6	HUMAN	Endoplasmin
[442]		P14625	ENPL_HUMAN	4	5.2	1.43	1.5e-05	491.746	2	173233	1	TIAK	SGTSEFLNK			Q20170801-09	69.4925	169	0.00011	1	803	92469.6	HUMAN	Endoplasmin
[442]		P14625	ENPL_HUMAN	4	5.2	1.43	1.5e-05	743.054	3	53539	5.4	VVLF	ETATLRSGYLLPDTKAYGDR			Q20170801-07	191.504	719	0.0031	1	803	92469.6	HUMAN	Endoplasmin
[442]		P14625	ENPL_HUMAN	4	5.2	1.43	1.5e-05	360.701	2	170089	-0.6	LVRK	TLDMIK			Q20170801-09	84.9042	468	0.013	4	803	92469.6	HUMAN	Endoplasmin
[443]		O00746	NDKM_HUMAN	1	4.8	3.24	3.5e-08	495.243	2	90651	-0.28	LVRH	GSGGPSWTR		Abu@N-term	Q20170801-07	61.1569	29	3.5e-08	1	187	20658.8	HUMAN	Nucleoside diphosphate kinase, mitochondrial
[444]		P55884	EIF3B_HUMAN	1	1	3.24	6.6e-08	353.165	3	966084	-0.47	ERRR	TMMEDFRK			Q20170801-09	79.6878	752	6.6e-08	1	814	92482.4	HUMAN	Eukaryotic translation initiation factor 3 subunit B
[445]		Q13404	UB2V1_HUMAN	1	8.8	3.23	1e-06	593.333	2	98656	0.12	-	MAATTGSGVKVPR		Met-loss+Acetyl@1	Q20170801-09	85.0405	1	1e-06	1	147	16495.1	HUMAN	Ubiquitin-conjugating enzyme E2 variant 1
[446]		P11279	LAMP1_HUMAN	2	4.8	1.95	1.2e-05	576.306	2	54147	-1	GSLR	ALQATVGNSYK			Q20170801-09	76.0302	327	1.2e-05	1	417	44882.8	HUMAN	Lysosome-associated membrane glycoprotein 1
[446]		P11279	LAMP1_HUMAN	2	4.8	1.95	1.2e-05	517.28	2	1400000	1	KEIK	TVESITDIR			Q20170801-09	110.202	138	0.00021	1	417	44882.8	HUMAN	Lysosome-associated membrane glycoprotein 1
[447]		Q9Y2U8	MAN1_HUMAN	1	1.9	3.21	6.4e-08	904.437	2	201080	-2.6	AGSK	VLLGFSSDESDVEASPR			Q20170801-09	164.298	135	6.4e-08	1	911	99998.3	HUMAN	Inner nuclear membrane protein Man1
[448]		Q6BDS2	URFB1_HUMAN	1	1	3.19	1.8e-08	679.338	2	46710	-1.3	PMAK	TDEGVAAPVSGGAAR			Q20170801-09	73.661	1078	1.8e-08	1	1440	159487	HUMAN	UHRF1-binding protein 1
[449]		Q9Y5J1	UTP18_HUMAN	1	2.3	3.18	1.8e-07	690.86	2	105999	0.55	LLQR	TGNFISTSTSLPR			Q20170801-09	141.278	221	1.8e-07	1	556	62004.1	HUMAN	U3 small nucleolar RNA-associated protein 18 homolog
[450]		Q5JTZ9	SYAM_HUMAN	2	2.7	2.83	3.2e-08	772.341	2	34198	-1.6	LLDR	TNFYAEQGGQASDR			Q20170801-09	76.1503	562	3.2e-08	1	985	107341	HUMAN	Alanine--tRNA ligase, mitochondrial
[450]		Q5JTZ9	SYAM_HUMAN	2	2.7	2.83	3.2e-08	487.931	3	64934	-1.9	WRGL	SHRPLSSEPPAAK		Abu@N-term	Q20170801-09	38.4769	26	0.0013	1	985	107341	HUMAN	Alanine--tRNA ligase, mitochondrial
[451]		Q5H9R7	PP6R3_HUMAN	3	4.5	1.08	3.1e-05	357.843	3	141747	-0.65	GGRR	HGYMGHLTR			Q20170801-09	47.4006	455	3.1e-05	1	873	97670	HUMAN	Serine/threonine-protein phosphatase 6 regulatory subunit 3
[451]		Q5H9R7	PP6R3_HUMAN	3	4.5	1.08	3.1e-05	542.268	3	77127	2.9	AEAK	CAAPRPPSSSPEQR	Carbamidomethyl@1	Abu@N-term	Q20170801-09	55.8327	844	3.1e-05	1	873	97670	HUMAN	Serine/threonine-protein phosphatase 6 regulatory subunit 3
[451]		Q5H9R7	PP6R3_HUMAN	3	4.5	1.08	3.1e-05	742.353	2	132301	-2.4	PEQR	TGQPSAPGDTSVNGPV			Q20170801-09	110.659	858	3.9e-05	1	873	97670	HUMAN	Serine/threonine-protein phosphatase 6 regulatory subunit 3
[452]		Q96RU2	UBP28_HUMAN	1	1.5	3.15	1.6e-08	647.989	3	97162	-1.3	VVER	TLLEQFADKNLSYDER			Q20170801-09	173.072	845	1.6e-08	1	1077	122492	HUMAN	Ubiquitin carboxyl-terminal hydrolase 28
[453]		Q5SXM8	DNLZ_HUMAN	1	8.4	3.15	9.7e-08	735.37	2	66052	-0.42	GWRR	SSSEQGPGPAAALGR		Abu@N-term	Q20170801-09	88.5746	49	9.7e-08	1	178	19204	HUMAN	DNL-type zinc finger protein
[454]		Q9BZE4	NOG1_HUMAN	1	1.9	3.14	3e-08	667.86	2	128808	-0.12	PNTR	TLLLCGYPNVGK	Carbamidomethyl@5		Q20170801-09	162.331	170	3e-08	1	634	73965.2	HUMAN	Nucleolar GTP-binding protein 1
[455]		P04439	1A03_HUMAN	2	7.4	2.24	4.8e-07	697.341	2	131744	-2.9	EDLR	SWTAADMAAQITK			Q20170801-09	168.125	156	4.8e-07	7	365	40841.1	HUMAN	HLA class I histocompatibility antigen, A-3 alpha chain
[455]		P04439	1A03_HUMAN	2	7.4	2.24	4.8e-07	815.42	2	124952	3.8	GEPR	FIAVGYVDDTQFVR			Q20170801-09	183.282	46	0.00015	41	365	40841.1	HUMAN	HLA class I histocompatibility antigen, A-3 alpha chain
[455-1]	1	P04222	1C03_HUMAN	2	7.7	1.14	4.9e-05	507.255	3	212349	0.53	EDLR	SWTAADTAAQITQR			Q20170801-09	142.516	156	4.9e-05	43	366	40861.1	HUMAN	HLA class I histocompatibility antigen, Cw-3 alpha chain
[455-1]	1	P04222	1C03_HUMAN	2	7.7	1.14	4.9e-05	815.42	2	124952	3.8	GEPH	FIAVGYVDDTQFVR			Q20170801-09	183.282	46	0.00015	41	366	40861.1	HUMAN	HLA class I histocompatibility antigen, Cw-3 alpha chain
[455-2]	1	P10319	1B58_HUMAN	2	7.7	1.14	4.9e-05	507.255	3	212349	0.53	EDLS	SWTAADTAAQITQR			Q20170801-09	142.516	156	4.9e-05	43	362	40337.5	HUMAN	HLA class I histocompatibility antigen, B-58 alpha chain
[455-2]	1	P10319	1B58_HUMAN	2	7.7	1.14	4.9e-05	815.42	2	124952	3.8	GEPR	FIAVGYVDDTQFVR			Q20170801-09	183.282	46	0.00015	41	362	40337.5	HUMAN	HLA class I histocompatibility antigen, B-58 alpha chain
[455-3]	1	P18464	1B51_HUMAN	2	7.7	1.14	4.9e-05	507.255	3	212349	0.53	EDLS	SWTAADTAAQITQR			Q20170801-09	142.516	156	4.9e-05	43	362	40566.6	HUMAN	HLA class I histocompatibility antigen, B-51 alpha chain
[455-3]	1	P18464	1B51_HUMAN	2	7.7	1.14	4.9e-05	815.42	2	124952	3.8	GEPR	FIAVGYVDDTQFVR			Q20170801-09	183.282	46	0.00015	41	362	40566.6	HUMAN	HLA class I histocompatibility antigen, B-51 alpha chain
[455-4]	1	P18465	1B57_HUMAN	2	7.7	1.14	4.9e-05	507.255	3	212349	0.53	EDLS	SWTAADTAAQITQR			Q20170801-09	142.516	156	4.9e-05	43	362	40224.5	HUMAN	HLA class I histocompatibility antigen, B-57 alpha chain
[455-4]	1	P18465	1B57_HUMAN	2	7.7	1.14	4.9e-05	815.42	2	124952	3.8	GEPR	FIAVGYVDDTQFVR			Q20170801-09	183.282	46	0.00015	41	362	40224.5	HUMAN	HLA class I histocompatibility antigen, B-57 alpha chain
[455-5]	1	P30464	1B15_HUMAN	2	7.7	1.14	4.9e-05	507.255	3	212349	0.53	EDLS	SWTAADTAAQITQR			Q20170801-09	142.516	156	4.9e-05	43	362	40388.4	HUMAN	HLA class I histocompatibility antigen, B-15 alpha chain
[455-5]	1	P30464	1B15_HUMAN	2	7.7	1.14	4.9e-05	815.42	2	124952	3.8	GEPR	FIAVGYVDDTQFVR			Q20170801-09	183.282	46	0.00015	41	362	40388.4	HUMAN	HLA class I histocompatibility antigen, B-15 alpha chain
[455-6]	1	P30484	1B46_HUMAN	2	7.7	1.14	4.9e-05	507.255	3	212349	0.53	EDLS	SWTAADTAAQITQR			Q20170801-09	142.516	156	4.9e-05	43	362	40440.5	HUMAN	HLA class I histocompatibility antigen, B-46 alpha chain
[455-6]	1	P30484	1B46_HUMAN	2	7.7	1.14	4.9e-05	815.42	2	124952	3.8	GEPR	FIAVGYVDDTQFVR			Q20170801-09	183.282	46	0.00015	41	362	40440.5	HUMAN	HLA class I histocompatibility antigen, B-46 alpha chain
[455-7]	1	P30490	1B52_HUMAN	2	7.7	1.14	4.9e-05	507.255	3	212349	0.53	EDLS	SWTAADTAAQITQR			Q20170801-09	142.516	156	4.9e-05	43	362	40521.5	HUMAN	HLA class I histocompatibility antigen, B-52 alpha chain
[455-7]	1	P30490	1B52_HUMAN	2	7.7	1.14	4.9e-05	815.42	2	124952	3.8	GEPR	FIAVGYVDDTQFVR			Q20170801-09	183.282	46	0.00015	41	362	40521.5	HUMAN	HLA class I histocompatibility antigen, B-52 alpha chain
[455-8]	1	P30491	1B53_HUMAN	2	7.7	1.14	4.9e-05	507.255	3	212349	0.53	EDLS	SWTAADTAAQITQR			Q20170801-09	142.516	156	4.9e-05	43	362	40495.7	HUMAN	HLA class I histocompatibility antigen, B-53 alpha chain
[455-8]	1	P30491	1B53_HUMAN	2	7.7	1.14	4.9e-05	815.42	2	124952	3.8	GEPR	FIAVGYVDDTQFVR			Q20170801-09	183.282	46	0.00015	41	362	40495.7	HUMAN	HLA class I histocompatibility antigen, B-53 alpha chain
[455-9]	1	P30492	1B54_HUMAN	2	7.7	1.14	4.9e-05	507.255	3	212349	0.53	EDLS	SWTAADTAAQITQR			Q20170801-09	142.516	156	4.9e-05	43	362	40380.4	HUMAN	HLA class I histocompatibility antigen, B-54 alpha chain
[455-9]	1	P30492	1B54_HUMAN	2	7.7	1.14	4.9e-05	815.42	2	124952	3.8	GEPR	FIAVGYVDDTQFVR			Q20170801-09	183.282	46	0.00015	41	362	40380.4	HUMAN	HLA class I histocompatibility antigen, B-54 alpha chain
[455-10]	1	P30493	1B55_HUMAN	2	7.7	1.14	4.9e-05	507.255	3	212349	0.53	EDLS	SWTAADTAAQITQR			Q20170801-09	142.516	156	4.9e-05	43	362	40496.5	HUMAN	HLA class I histocompatibility antigen, B-55 alpha chain
[455-10]	1	P30493	1B55_HUMAN	2	7.7	1.14	4.9e-05	815.42	2	124952	3.8	GEPR	FIAVGYVDDTQFVR			Q20170801-09	183.282	46	0.00015	41	362	40496.5	HUMAN	HLA class I histocompatibility antigen, B-55 alpha chain
[455-11]	1	P30495	1B56_HUMAN	2	7.7	1.14	4.9e-05	507.255	3	212349	0.53	EDLS	SWTAADTAAQITQR			Q20170801-09	142.516	156	4.9e-05	43	362	40478.5	HUMAN	HLA class I histocompatibility antigen, B-56 alpha chain
[455-11]	1	P30495	1B56_HUMAN	2	7.7	1.14	4.9e-05	815.42	2	124952	3.8	GEPR	FIAVGYVDDTQFVR			Q20170801-09	183.282	46	0.00015	41	362	40478.5	HUMAN	HLA class I histocompatibility antigen, B-56 alpha chain
[455-12]	1	P30498	1B78_HUMAN	2	7.7	1.14	4.9e-05	507.255	3	212349	0.53	EDLS	SWTAADTAAQITQR			Q20170801-09	142.516	156	4.9e-05	43	362	40478.4	HUMAN	HLA class I histocompatibility antigen, B-78 alpha chain
[455-12]	1	P30498	1B78_HUMAN	2	7.7	1.14	4.9e-05	815.42	2	124952	3.8	GEPR	FIAVGYVDDTQFVR			Q20170801-09	183.282	46	0.00015	41	362	40478.4	HUMAN	HLA class I histocompatibility antigen, B-78 alpha chain
[455-13]	1	P30501	1C02_HUMAN	2	7.7	1.14	4.9e-05	507.255	3	212349	0.53	EDLR	SWTAADTAAQITQR			Q20170801-09	142.516	156	4.9e-05	43	366	41095.2	HUMAN	HLA class I histocompatibility antigen, Cw-2 alpha chain
[455-13]	1	P30501	1C02_HUMAN	2	7.7	1.14	4.9e-05	815.42	2	124952	3.8	GEPH	FIAVGYVDDTQFVR			Q20170801-09	183.282	46	0.00015	41	366	41095.2	HUMAN	HLA class I histocompatibility antigen, Cw-2 alpha chain
[455-14]	1	P30504	1C04_HUMAN	2	7.7	1.14	4.9e-05	507.255	3	212349	0.53	EDLR	SWTAADTAAQITQR			Q20170801-09	142.516	156	4.9e-05	43	366	40995.3	HUMAN	HLA class I histocompatibility antigen, Cw-4 alpha chain
[455-14]	1	P30504	1C04_HUMAN	2	7.7	1.14	4.9e-05	815.42	2	124952	3.8	GEPR	FIAVGYVDDTQFVR			Q20170801-09	183.282	46	0.00015	41	366	40995.3	HUMAN	HLA class I histocompatibility antigen, Cw-4 alpha chain
[455-15]	1	P30508	1C12_HUMAN	2	7.7	1.14	4.9e-05	507.255	3	212349	0.53	EDLR	SWTAADTAAQITQR			Q20170801-09	142.516	156	4.9e-05	43	366	40886.1	HUMAN	HLA class I histocompatibility antigen, Cw-12 alpha chain
[455-15]	1	P30508	1C12_HUMAN	2	7.7	1.14	4.9e-05	815.42	2	124952	3.8	GEPR	FIAVGYVDDTQFVR			Q20170801-09	183.282	46	0.00015	41	366	40886.1	HUMAN	HLA class I histocompatibility antigen, Cw-12 alpha chain
[455-16]	1	P30510	1C14_HUMAN	2	7.7	1.14	4.9e-05	507.255	3	212349	0.53	EDLR	SWTAADTAAQITQR			Q20170801-09	142.516	156	4.9e-05	43	366	40838	HUMAN	HLA class I histocompatibility antigen, Cw-14 alpha chain
[455-16]	1	P30510	1C14_HUMAN	2	7.7	1.14	4.9e-05	815.42	2	124952	3.8	GEPR	FIAVGYVDDTQFVR			Q20170801-09	183.282	46	0.00015	41	366	40838	HUMAN	HLA class I histocompatibility antigen, Cw-14 alpha chain
[455-17]	1	P30685	1B35_HUMAN	2	7.7	1.14	4.9e-05	507.255	3	212349	0.53	EDLS	SWTAADTAAQITQR			Q20170801-09	142.516	156	4.9e-05	43	362	40455.6	HUMAN	HLA class I histocompatibility antigen, B-35 alpha chain
[455-17]	1	P30685	1B35_HUMAN	2	7.7	1.14	4.9e-05	815.42	2	124952	3.8	GEPR	FIAVGYVDDTQFVR			Q20170801-09	183.282	46	0.00015	41	362	40455.6	HUMAN	HLA class I histocompatibility antigen, B-35 alpha chain
[455-18]	1	Q07000	1C15_HUMAN	2	7.7	1.14	4.9e-05	507.255	3	212349	0.53	EDLR	SWTAADTAAQITQR			Q20170801-09	142.516	156	4.9e-05	43	366	40863.2	HUMAN	HLA class I histocompatibility antigen, Cw-15 alpha chain
[455-18]	1	Q07000	1C15_HUMAN	2	7.7	1.14	4.9e-05	815.42	2	124952	3.8	GEPH	FIAVGYVDDTQFVR			Q20170801-09	183.282	46	0.00015	41	366	40863.2	HUMAN	HLA class I histocompatibility antigen, Cw-15 alpha chain
[455-19]	1	Q29940	1B59_HUMAN	2	7.7	1.14	4.9e-05	507.255	3	212349	0.53	EDLS	SWTAADTAAQITQR			Q20170801-09	142.516	156	4.9e-05	43	362	40584.7	HUMAN	HLA class I histocompatibility antigen, B-59 alpha chain
[455-19]	1	Q29940	1B59_HUMAN	2	7.7	1.14	4.9e-05	815.42	2	124952	3.8	GEPR	FIAVGYVDDTQFVR			Q20170801-09	183.282	46	0.00015	41	362	40584.7	HUMAN	HLA class I histocompatibility antigen, B-59 alpha chain
[456]		Q16543	CDC37_HUMAN	1	2.9	3.12	5.6e-08	639.313	2	330396	-0.72	KKEK	SMPWNVDTLSK			Q20170801-09	162.178	111	5.6e-08	1	378	44468.7	HUMAN	Hsp90 co-chaperone Cdc37
[457]		O94832	MYO1D_HUMAN	2	2.3	2.63	1.6e-07	655.314	2	144662	-0.3	MLLK	SNCVLEAFGNAK	Carbamidomethyl@3		Q20170801-09	144.027	141	1.6e-07	1	1006	116203	HUMAN	Unconventional myosin-Id
[457]		O94832	MYO1D_HUMAN	2	2.3	2.63	1.6e-07	591.827	2	220431	-1.2	QLIK	SIPASDLPQVR			Q20170801-09	126.67	791	0.0015	1	1006	116203	HUMAN	Unconventional myosin-Id
[458]		Q9UBQ0	VPS29_HUMAN	1	5.5	3.1	5.9e-08	360.877	3	410087	-0.27	DYLK	TLAGDVHIVR			Q20170801-09	101.892	51	5.9e-08	1	182	20505.9	HUMAN	Vacuolar protein sorting-associated protein 29
[459]		P26639	SYTC_HUMAN	3	6.2	2.02	1.9e-06	583.657	3	325933	1.1	FKCR	ILNEKVNTPTTTVYR			Q20170801-09	117.79	239	1.9e-06	1	723	83435.8	HUMAN	Threonine--tRNA ligase, cytoplasmic
[459]		P26639	SYTC_HUMAN	3	6.2	2.02	1.9e-06	474.753	2	1430000	-0.0035	HGER	TISETIER			Q20170801-09	65.3811	700	0.00062	1	723	83435.8	HUMAN	Threonine--tRNA ligase, cytoplasmic
[459]		P26639	SYTC_HUMAN	3	6.2	2.02	1.9e-06	774.398	3	111205	0.032	ESWK	TTPYQIACGISQGLADNTVIAK	Carbamidomethyl@8		Q20170801-09	197.354	100	0.0017	1	723	83435.8	HUMAN	Threonine--tRNA ligase, cytoplasmic
[460]		O60524	NEMF_HUMAN	1	0.9	3.1	3.8e-08	379.191	3	520947	0.57	KAAK	TALNSFMHSK			Q20170801-09	97.7495	1028	3.8e-08	1	1076	122955	HUMAN	Nuclear export mediator factor NEMF
[461]		P46926	GNPI1_HUMAN	1	4.2	3.09	2.3e-07	645.348	2	211991	0.87	TRVK	TLAMDTILANAR			Q20170801-09	172.621	161	2.3e-07	1	289	32668.8	HUMAN	Glucosamine-6-phosphate isomerase 1
[462]		Q9Y5B9	SP16H_HUMAN	1	1.2	3.09	1.2e-06	504.933	3	415338	1.5	-	MAVTLDKDAYYRR		Met-loss+Acetyl@1	Q20170801-09	121.391	1	1.2e-06	1	1047	119915	HUMAN	FACT complex subunit SPT16
[463]		P62244	RS15A_HUMAN	1	10.8	3.08	1.6e-07	567.606	3	377677	-0.21	VMMK	HGYIGEFEIIDDHR			Q20170801-09	155.062	44	1.6e-07	1	130	14839.6	HUMAN	40S ribosomal protein S15a
[464]		Q5C9Z4	NOM1_HUMAN	1	1.5	3.04	5.8e-08	598.805	2	100861	1.4	RLQR	TAGPEQGPGLGGR			Q20170801-09	61.6958	101	5.8e-08	1	860	96258.2	HUMAN	Nucleolar MIF4G domain-containing protein 1
[465]		Q04721	NOTC2_HUMAN	1	0.6	2.99	6.2e-08	772.384	2	38800	0.57	MTRR	SLPGEQEQEVAGSK		Abu@N-term	Q20170801-09	97.1043	1609	6.2e-08	1	2471	265408	HUMAN	Neurogenic locus notch homolog protein 2
[466]		Q16531	DDB1_HUMAN	3	1.5	1.99	5.2e-06	397.224	3	631220	-1.1	LHIR	TVPLYESPRK			Q20170801-09	72.8943	714	5.2e-06	1	1140	126969	HUMAN	DNA damage-binding protein 1
[466]		Q16531	DDB1_HUMAN	3	1.5	1.99	5.2e-06	531.285	2	1800000	-0.11	LHIR	TVPLYESPR			Q20170801-09	98.2884	714	0.0026	1	1140	126969	HUMAN	DNA damage-binding protein 1
[466]		Q16531	DDB1_HUMAN	3	1.5	1.99	5.2e-06	434.234	2	352867	3.3	RHVK	TYEVSLR			Q20170801-09	92.3266	192	0.0037	1	1140	126969	HUMAN	DNA damage-binding protein 1
[467]		Q9UPQ9	TNR6B_HUMAN	1	1	2.95	6.4e-07	776.399	3	45243	-4.1	SGRR	SYRPTHPDCQAVLQTLLSR	Carbamidomethyl@9	Abu@N-term	Q20170801-07	174.614	592	6.4e-07	1	1833	194004	HUMAN	Trinucleotide repeat-containing gene 6B protein
[468]		P48729	KC1A_HUMAN	1	2.7	2.94	3.1e-07	515.289	2	494455	-2.8	YFNR	TSLPWQGLK			Q20170801-09	155.377	217	3.1e-07	1	337	38915.2	HUMAN	Casein kinase I isoform alpha
[469]		Q9BTV5	FSD1_HUMAN	1	2	2.92	1.2e-07	507.273	2	58844	1.1	GKGR	TASPINSPAR			Q20170801-09	50.887	311	1.2e-07	1	496	55820.2	HUMAN	Fibronectin type III and SPRY domain-containing protein 1
[470]		Q14847	LASP1_HUMAN	1	3.8	2.89	1.6e-07	615.81	2	711725	-1.4	QSFT	MVADTPENLR		Abu@N-term	Q20170801-09	107.208	64	1.6e-07	1	261	29717.4	HUMAN	LIM and SH3 domain protein 1
[471]		Q9HAB8	PPCS_HUMAN	1	2.9	2.88	1.6e-06	515.757	2	327156	1	LQSR	HTAFIGDRN			Q20170801-09	47.0121	303	1.6e-06	1	311	34005.4	HUMAN	Phosphopantothenate--cysteine ligase
[472]		Q9UKN8	TF3C4_HUMAN	1	1.6	2.88	3.3e-06	700.385	2	260033	0.41	VIHR	TSVPAPLNSCLLK	Carbamidomethyl@10		Q20170801-09	162.12	107	3.3e-06	1	822	91983.2	HUMAN	General transcription factor 3C polypeptide 4
[473]		P81605	DCD_HUMAN	1	10	2.87	1.9e-07	564.768	2	169207	0.031	AAQK	ENAGEDPGLAR			Q20170801-09	48.7316	43	1.9e-07	1	110	11284	HUMAN	Dermcidin
[474]		Q96PK6	RBM14_HUMAN	1	1.8	2.86	3.1e-06	662.819	2	135446	-0.066	VGYR	TQPMTAQAASYR			Q20170801-09	79.1169	263	3.1e-06	1	669	69492.2	HUMAN	RNA-binding protein 14
[475]		Q7L2E3	DHX30_HUMAN	1	0.9	2.83	1.3e-06	613.363	2	196328	3.2	EILR	TPLENLVLQAK			Q20170801-09	167.732	814	1.3e-06	1	1194	133939	HUMAN	Putative ATP-dependent RNA helicase DHX30
[476]		P13645	K1C10_HUMAN	1	2.1	2.79	8.1e-08	719.854	2	33447	-3.4	VRAL	EESNYELEGKIK			Q20170801-09	86.8851	168	8.1e-08	1	584	58827.5	HUMAN	Keratin, type I cytoskeletal 10
[477]		P56537	IF6_HUMAN	1	5.7	2.79	2e-07	823.849	2	61280	-1.5	MAVR	ASFENNCEIGCFAK	Carbamidomethyl@7;Carbamidomethyl@11		Q20170801-09	141.452	5	2e-07	1	245	26599.3	HUMAN	Eukaryotic translation initiation factor 6
[478]		Q9HB71	CYBP_HUMAN	2	8.3	1.75	9.1e-06	602.326	2	150438	-3	DMKR	TINKAWVESR			Q20170801-09	80.0611	209	9.1e-06	1	228	26210.2	HUMAN	Calcyclin-binding protein
[478]		Q9HB71	CYBP_HUMAN	2	8.3	1.75	9.1e-06	545.799	2	211799	-1.3	KKVK	TDTVLILCR	Carbamidomethyl@8		Q20170801-09	143.222	147	0.00023	1	228	26210.2	HUMAN	Calcyclin-binding protein
[479]		P13798	ACPH_HUMAN	1	1.2	2.74	4.5e-06	386.528	3	225044	0.049	GQYR	TVHTEWTQR			Q20170801-09	52.0002	45	4.5e-06	1	732	81225.3	HUMAN	Acylamino-acid-releasing enzyme
[480]		Q5SSJ5	HP1B3_HUMAN	1	2.7	2.74	7.2e-06	801.434	2	94178	-2	KVKK	TIPSWATLSASQLAR			Q20170801-09	184.917	132	7.2e-06	1	553	61207.5	HUMAN	Heterochromatin protein 1-binding protein 3
[481]		Q9H098	F107B_HUMAN	1	9.2	2.73	2.5e-07	704.4	2	69215	-1.4	NQKR	GLAPQNKPELQK		Abu@N-term	Q20170801-09	74.2731	44	2.5e-07	1	131	15557.8	HUMAN	Protein FAM107B
[482]		P78417	GSTO1_HUMAN	1	7.5	2.71	1.9e-07	569.311	3	254968	-2.7	ESAR	SLGKGSAPPGPVPEGSIR			Q20170801-09	106.853	8	1.9e-07	1	241	27566.1	HUMAN	Glutathione S-transferase omega-1
[483]		Q92900	RENT1_HUMAN	1	1.2	2.7	3.3e-07	690.831	2	297509	-0.37	QGER	AYQHGGVTGLSQY			Q20170801-09	112.887	1117	3.3e-07	1	1129	124346	HUMAN	Regulator of nonsense transcripts 1
[484]		Q10570	CPSF1_HUMAN	2	1.2	2.27	1.5e-07	471.78	2	201966	0.33	DGRR	HGFLILSR			Q20170801-09	134.611	572	1.5e-07	1	1443	160885	HUMAN	Cleavage and polyadenylation specificity factor subunit 1
[484]		Q10570	CPSF1_HUMAN	2	1.2	2.27	1.5e-07	571.813	2	348172	1.6	NAVR	NVLDGELLNR			Q20170801-09	151.597	1397	0.00038	1	1443	160885	HUMAN	Cleavage and polyadenylation specificity factor subunit 1
[485]		Q10471	GALT2_HUMAN	2	3.2	1.35	4.6e-05	629.303	2	110434	-1.4	SKLR	HVGSNLCLDSR	Carbamidomethyl@7		Q20170801-09	75.1668	533	4.6e-05	1	571	64733.4	HUMAN	Polypeptide N-acetylgalactosaminyltransferase 2
[485]		Q10471	GALT2_HUMAN	2	3.2	1.35	4.6e-05	373.245	2	349824	2	ALLR	TVVSVLK			Q20170801-09	86.6941	155	4.7e-05	1	571	64733.4	HUMAN	Polypeptide N-acetylgalactosaminyltransferase 2
[486]		Q8WV74	NUDT8_HUMAN	1	5.5	2.69	9.8e-07	788.378	2	70653	-1.8	-	MLPDCLSAEGELR	Carbamidomethyl@5	Abu@N-term	Q20170801-07	170.019	1	9.8e-07	1	236	25370.5	HUMAN	Nucleoside diphosphate-linked moiety X motif 8
[487]		Q9NR30	DDX21_HUMAN	1	2	2.69	1.3e-06	461.496	4	401618	0.67	IQAK	TFHHVYSGKDLIAQAR			Q20170801-09	113.188	216	1.3e-06	1	783	87345.1	HUMAN	Nucleolar RNA helicase 2
[488]		Q9BZD4	NUF2_HUMAN	1	2.6	2.68	1.8e-06	488.245	3	135714	0.93	QYKR	TVIEDCNKVQEK	Carbamidomethyl@6		Q20170801-09	51.7118	372	1.8e-06	1	464	54304.1	HUMAN	Kinetochore protein Nuf2
[489]		Q9NX14	NDUBB_HUMAN	1	7.2	2.67	3.3e-06	500.296	2	452153	1.1	SFSR	TVVAPSAVAGK			Q20170801-09	70.5958	36	3.3e-06	1	153	17316.8	HUMAN	NADH dehydrogenase [ubiquinone] 1 beta subcomplex subunit 11, mitochondrial
[490]		P54709	AT1B3_HUMAN	1	3.9	2.67	1.9e-06	393.58	3	1600000	0.81	KMNR	IIGLKPEGVPR			Q20170801-09	117.452	178	1.9e-06	1	279	31512.9	HUMAN	Sodium/potassium-transporting ATPase subunit beta-3
[491]		P49748	ACADV_HUMAN	1	2.1	2.67	2.8e-07	707.382	2	89319	-1.6	VFAK	TPVTDPATGAVKEK			Q20170801-09	65.0748	265	2.8e-07	1	655	70390.7	HUMAN	Very long-chain specific acyl-CoA dehydrogenase, mitochondrial
[492]		Q96H20	SNF8_HUMAN	2	4.3	1.46	0.00031	414.75	2	504044	-1.1	MHRR	GVGAGAIAK		Abu@N-term	Q20170801-07	56.9748	5	0.00031	1	258	28864.5	HUMAN	Vacuolar-sorting protein SNF8
[492]		Q96H20	SNF8_HUMAN	2	4.3	1.46	0.00031	362.233	3	217076	-0.34	MHRR	GVGAGAIAKKK		Abu@N-term	Q20170801-09	26.2121	5	0.0027	1	258	28864.5	HUMAN	Vacuolar-sorting protein SNF8
[493]		Q9Y6G9	DC1L1_HUMAN	1	2.1	2.64	1.9e-06	385.896	3	197677	-0.15	SNVA	SVSPIPAGSKK		Abu@N-term	Q20170801-09	52.9352	419	1.9e-06	1	523	56579.6	HUMAN	Cytoplasmic dynein 1 light intermediate chain 1
[494]		Q99640	PMYT1_HUMAN	1	2	2.63	5.8e-07	407.216	3	257947	-0.92	FPPR	TPGWHQLQPR			Q20170801-09	93.7866	71	5.8e-07	1	499	54521.9	HUMAN	Membrane-associated tyrosine- and threonine-specific cdc2-inhibitory kinase
[495]		Q969V3	NCLN_HUMAN	2	1.8	1.52	0.00012	378.541	3	66642	-1	TEAR	TMAAEVLSRR			Q20170801-07	97.331	74	0.00012	1	563	62974.9	HUMAN	Nicalin
[495]		Q969V3	NCLN_HUMAN	2	1.8	1.52	0.00012	489.257	2	649838	-0.98	TEAR	TMAAEVLSR			Q20170801-09	103.068	74	0.00022	1	563	62974.9	HUMAN	Nicalin
[496]		O15357	SHIP2_HUMAN	1	1.1	2.62	5.5e-07	723.865	2	117350	-0.42	QMAK	TLSEVDYAPAGPAR			Q20170801-09	121.43	1129	5.5e-07	1	1258	138600	HUMAN	Phosphatidylinositol 3,4,5-trisphosphate 5-phosphatase 2
[497]		P47897	SYQ_HUMAN	3	4.3	1.27	2.2e-05	593.837	2	136772	-0.0016	VFNR	TVTLKEDPGKV			Q20170801-09	76.9453	765	2.2e-05	1	775	87799.5	HUMAN	Glutamine--tRNA ligase
[497]		P47897	SYQ_HUMAN	3	4.3	1.27	2.2e-05	383.228	3	121374	0.78	AINR	HRPQLLVER			Q20170801-09	72.3035	133	0.00029	1	775	87799.5	HUMAN	Glutamine--tRNA ligase
[497]		P47897	SYQ_HUMAN	3	4.3	1.27	2.2e-05	395.7	4	1280000	0.78	FIER	TDFKEEPEPGFKR			Q20170801-09	86.4777	617	0.00032	1	775	87799.5	HUMAN	Glutamine--tRNA ligase
[498]		P05556	ITB1_HUMAN	1	1.5	2.58	1e-06	654.847	2	129763	-0.48	FVEK	TVMPYISTTPAK			Q20170801-09	135.712	191	1e-06	1	798	88416.2	HUMAN	Integrin beta-1
[499]		P11047	LAMC1_HUMAN	1	1.2	2.56	3.2e-07	748.314	3	24656	0.42	EACS	SCHCSPVGSLSTQCDSYGR	Carbamidomethyl@2;Carbamidomethyl@4;Carbamidomethyl@14	Abu@N-term	Q20170801-07	106.89	397	3.2e-07	1	1609	177605	HUMAN	Laminin subunit gamma-1
[500]		P04181	OAT_HUMAN	1	3.2	2.54	8.3e-07	781.376	2	164975	-2.7	ATKK	TVQGPPTSDDIFER			Q20170801-07	145.045	33	8.3e-07	1	439	48535.3	HUMAN	Ornithine aminotransferase, mitochondrial
[501]		Q8N2K0	ABD12_HUMAN	1	2.5	2.49	1.4e-06	394.204	3	270242	0.18	MRKR	TEPVALEHER			Q20170801-09	56.4693	5	1.4e-06	1	398	45097.1	HUMAN	Monoacylglycerol lipase ABHD12
[502]		Q9HDC9	APMAP_HUMAN	2	5	1.32	1.4e-05	435.976	4	538304	0.13	GPCK	TRDDEPVCGRPLGIR	Carbamidomethyl@8		Q20170801-09	93.2806	142	1.4e-05	1	416	46480.8	HUMAN	Adipocyte plasma membrane-associated protein
[502]		Q9HDC9	APMAP_HUMAN	2	5	1.32	1.4e-05	390.197	2	372615	0.18	GSFR	SPFLCR	Carbamidomethyl@5		Q20170801-09	75.9772	405	2.8e-05	1	416	46480.8	HUMAN	Adipocyte plasma membrane-associated protein
[503]		Q14738	2A5D_HUMAN	2	3.7	1.92	1.5e-05	624.832	2	201799	4.7	LLKR	TVETEAVQMLK			Q20170801-07	153.866	550	1.5e-05	1	602	69992.4	HUMAN	Serine/threonine-protein phosphatase 2A 56 kDa regulatory subunit delta isoform
[503]		Q14738	2A5D_HUMAN	2	3.7	1.92	1.5e-05	646.842	2	106109	3.5	LRRK	SELPQDVYTIK			Q20170801-09	142.561	573	0.0094	1	602	69992.4	HUMAN	Serine/threonine-protein phosphatase 2A 56 kDa regulatory subunit delta isoform
[504]		decoy	decoy	1	1.2	2.47	2.9e-06	798.368	2	260922	-0.63	IKDC	STNDLSDNGTPYAR		Abu@N-term	Q20170801-09	114.573	1108	2.9e-06	1	1172	129992	HUMAN	Thrombospondin-2
[505]		P60228	EIF3E_HUMAN	2	4	1.9	1.6e-05	430.266	2	970367	-0.29	REKR	TTVVAQLK			Q20170801-09	72.1733	75	1.6e-05	1	445	52221.3	HUMAN	Eukaryotic translation initiation factor 3 subunit E
[505]		P60228	EIF3E_HUMAN	2	4	1.9	1.6e-05	582.79	2	205728	-1.7	LSFR	SQMLAMNIEK			Q20170801-09	128.731	415	0.0044	1	445	52221.3	HUMAN	Eukaryotic translation initiation factor 3 subunit E
[506]		Q9P265	DIP2B_HUMAN	1	0.7	2.46	5e-07	439.231	3	102935	0.91	SCVR	TCVVVAEERPR	Carbamidomethyl@2		Q20170801-09	67.5057	1281	5e-07	2	1576	171493	HUMAN	Disco-interacting protein 2 homolog B
[507]		Q13395	TARB1_HUMAN	1	0.9	2.36	5.7e-06	700.879	2	100	0.79	RFWR	TVQAGLGQADALTR			Q20170801-09	123.484	268	5.7e-06	1	1621	181676	HUMAN	Probable methyltransferase TARBP1
[508]		P52788	SPSY_HUMAN	1	3	2.35	1.2e-06	610.311	2	604767	-0.24	AAAR	HSTLDFMLGAK			Q20170801-09	153.321	6	1.2e-06	1	366	41268.6	HUMAN	Spermine synthase
[509]		P15121	ALDR_HUMAN	2	4.7	1.88	2.4e-06	451.277	2	208793	0.93	KHNK	TTAQVLIR			Q20170801-09	83.467	244	2.4e-06	2	316	35853.7	HUMAN	Aldose reductase
[509]		P15121	ALDR_HUMAN	2	4.7	1.88	2.4e-06	391.76	2	140613	-0.16	PMQR	NLVVIPK			Q20170801-09	114.592	257	0.001	1	316	35853.7	HUMAN	Aldose reductase
[510]		Q15477	SKIV2_HUMAN	1	1	2.34	8.5e-07	626.826	2	129082	2.3	EVLR	TLGYVDEAGTVK			Q20170801-09	112.89	1064	8.5e-07	1	1246	137756	HUMAN	Helicase SKI2W
[511]		P28066	PSA5_HUMAN	2	9.1	2.23	2e-07	571.933	3	169408	0.67	FLTR	SEYDRGVNTFSPEGR			Q20170801-09	106.033	6	2e-07	1	241	26411.3	HUMAN	Proteasome subunit alpha type-5
[511]		P28066	PSA5_HUMAN	2	9.1	2.23	2e-07	387.26	2	120594	-1.3	EAIK	SSLIILK			Q20170801-09	128.56	197	0.0018	2	241	26411.3	HUMAN	Proteasome subunit alpha type-5
[512]		Q6P158	DHX57_HUMAN	1	0.8	2.31	4.4e-06	669.314	2	126470	-0.47	RRNR	TAFEEVEEDLR			Q20170801-09	164.167	768	4.4e-06	1	1386	155606	HUMAN	Putative ATP-dependent RNA helicase DHX57
[513]		P17174	AATC_HUMAN	2	5.3	1.64	6.7e-06	522.598	3	254830	0.75	GAYR	TDDCHPWVLPVVK	Carbamidomethyl@4		Q20170801-09	164.989	43	6.7e-06	1	413	46247.9	HUMAN	Aspartate aminotransferase, cytoplasmic
[513]		P17174	AATC_HUMAN	2	5.3	1.64	6.7e-06	466.774	2	155503	0.53	PSGR	INVSGLTTK			Q20170801-09	95.7875	388	0.00045	1	413	46247.9	HUMAN	Aspartate aminotransferase, cytoplasmic
[514]		Q8TAT6	NPL4_HUMAN	1	2	2.28	1.2e-06	706.837	2	43001	-2.3	FWRK	TGNQHFGYLYGR			Q20170801-09	108.316	244	1.2e-06	1	608	68120.8	HUMAN	Nuclear protein localization protein 4 homolog
[515]		P27707	DCK_HUMAN	1	3.5	2.28	1.7e-06	362.178	3	170602	-0.88	IYLQ	ATPETCLHR	Carbamidomethyl@6		Q20170801-09	39.2091	180	1.7e-06	1	260	30518.8	HUMAN	Deoxycytidine kinase
[516]		P40692	MLH1_HUMAN	1	1.6	2.26	1.6e-05	650.846	2	276511	-0.74	ADVR	TLPNASTVDNIR			Q20170801-09	120.129	206	1.6e-05	1	756	84601.7	HUMAN	DNA mismatch repair protein Mlh1
[517]		P19404	NDUV2_HUMAN	1	4	2.25	7.4e-06	357.202	3	370148	0.41	VMQN	GAGGALFVHR		Abu@N-term	Q20170801-09	90.9985	33	7.4e-06	1	249	27391.8	HUMAN	NADH dehydrogenase [ubiquinone] flavoprotein 2, mitochondrial
[518]		O76031	CLPX_HUMAN	1	1.6	2.25	1.7e-05	514.778	2	149484	-0.58	KGRR	AAAAADLANR		Abu@N-term	Q20170801-09	61.9674	453	1.7e-05	1	633	69224.3	HUMAN	ATP-dependent Clp protease ATP-binding subunit clpX-like, mitochondrial
[519]		O75390	CISY_HUMAN	1	1.9	2.25	3.2e-06	492.231	2	390238	0.15	ERPK	SMSTEGLMK			Q20170801-09	86.4943	451	3.2e-06	1	466	51712.9	HUMAN	Citrate synthase, mitochondrial
[520]		Q8TEX9	IPO4_HUMAN	1	0.9	2.23	2e-05	529.814	2	1000000	-0.57	VQIQ	SLETLGVLAR			Q20170801-09	155.914	544	2e-05	1	1081	118716	HUMAN	Importin-4
[521]		O43464	HTRA2_HUMAN	1	2.4	2.23	1.5e-06	580.824	2	818910	-1.2	AVLA	AVPSPPPASPR		Abu@N-term	Q20170801-07	89.8918	134	1.5e-06	1	458	48841.2	HUMAN	Serine protease HTRA2, mitochondrial
[522]		Q93034	CUL5_HUMAN	2	2.2	1.9	1.8e-06	477.731	2	289767	3.1	NFEK	AYLDSTER			Q20170801-09	114.908	205	1.8e-06	1	780	90956.2	HUMAN	Cullin-5
[522]		Q93034	CUL5_HUMAN	2	2.2	1.9	1.8e-06	494.273	2	120188	2.1	VNIK	ILNAGAWSR			Q20170801-09	115.391	530	0.0015	1	780	90956.2	HUMAN	Cullin-5
[523]		Q7Z460	CLAP1_HUMAN	1	1	2.22	1e-05	691.353	2	175009	-5.7	SPGK	LLGSGYGGLTGGSSR			Q20170801-09	128.569	692	1e-05	1	1538	169452	HUMAN	CLIP-associating protein 1
[524]		P48449	ERG7_HUMAN	2	2.6	1.23	4.8e-06	547.762	2	20569	-4.7	MAVR	HPDIEAQER			Q20170801-09	33.0938	664	4.8e-06	1	732	83309.5	HUMAN	Lanosterol synthase
[524]		P48449	ERG7_HUMAN	2	2.6	1.23	4.8e-06	604.275	2	166510	1.3	VFNK	SCAISYTSYR	Carbamidomethyl@2		Q20170801-09	100.819	699	1.4e-05	1	732	83309.5	HUMAN	Lanosterol synthase
[525]		P56182	RRP1_HUMAN	1	2.6	2.22	8.5e-07	687.389	2	133406	-2.2	IAAR	TKDSLVLNNITR			Q20170801-09	114.334	204	8.5e-07	1	461	52839.7	HUMAN	Ribosomal RNA processing protein 1 homolog A
[526]		P21912	SDHB_HUMAN	1	3.6	2.19	2.6e-05	521.785	2	201785	-0.96	ASRG	AQTAAATAPR		Abu@N-term	Q20170801-07	29.2055	29	2.6e-05	1	280	31630	HUMAN	Succinate dehydrogenase [ubiquinone] iron-sulfur subunit, mitochondrial
[527]		Q9UG56	PISD_HUMAN	1	2.2	2.17	3.8e-06	408.875	3	121657	-0.91	MKEA	AVEDLHHYR		Abu@N-term	Q20170801-09	61.5586	155	3.8e-06	1	409	46672.1	HUMAN	Phosphatidylserine decarboxylase proenzyme, mitochondrial
[528]		P24539	AT5F1_HUMAN	1	3.1	2.16	1.3e-06	539.278	2	747946	0.21	VQKR	HYLFDVQR			Q20170801-09	120.363	164	1.3e-06	1	256	28908.9	HUMAN	ATP synthase F(0) complex subunit B1, mitochondrial
[529]		P16949	STMN1_HUMAN	1	9.4	2.15	3e-06	515.615	3	94355	0.88	-	MASSDIQVKELEKR		Met-loss+Acetyl@1	Q20170801-07	113.001	1	3e-06	1	149	17302.7	HUMAN	Stathmin
[530]		Q9P206	K1522_HUMAN	1	1.2	2.1	4.9e-06	642.838	2	171761	-1	NPAN	SWVPGLSPGGSR		Abu@N-term	Q20170801-09	152.873	498	4.9e-06	1	1035	107096	HUMAN	Uncharacterized protein KIAA1522
[531]		P57740	NU107_HUMAN	1	1.5	2.1	1.1e-05	536.943	3	380793	1.2	VIPR	TPSSFRQPFTPTSR			Q20170801-09	110.028	55	1.1e-05	1	925	106375	HUMAN	Nuclear pore complex protein Nup107
[532]		P17987	TCPA_HUMAN	2	3.2	1.63	7.3e-06	486.773	2	807078	2.2	NIVK	SSLGPVGLDK			Q20170801-09	105.642	34	7.3e-06	1	556	60344.1	HUMAN	T-complex protein 1 subunit alpha
[532]		P17987	TCPA_HUMAN	2	3.2	1.63	7.3e-06	430.763	2	405134	-0.66	TKAR	TSASIILR			Q20170801-09	97.5521	371	0.0011	1	556	60344.1	HUMAN	T-complex protein 1 subunit alpha
[533]		O00483	NDUA4_HUMAN	1	9.9	2.09	3.3e-06	498.754	2	565585	1	YKFY	SVNVDYSK		Abu@N-term	Q20170801-09	69.0277	66	3.3e-06	1	81	9369.9	HUMAN	Cytochrome c oxidase subunit NDUFA4
[534]		Q8N766	EMC1_HUMAN	1	0.7	2.08	1.9e-05	437.743	2	364684	1.6	LNSR	TGEILWR			Q20170801-09	122.795	70	1.9e-05	1	993	111760	HUMAN	ER membrane protein complex subunit 1
[535]		P53621	COPA_HUMAN	2	1.4	1.78	8.1e-06	595.842	2	1050000	-0.86	GIIR	TLDLPIYVTR			Q20170801-09	177.6	563	8.1e-06	1	1224	138347	HUMAN	Coatomer subunit alpha
[535]		P53621	COPA_HUMAN	2	1.4	1.78	8.1e-06	404.719	2	1500000	-0.38	MSKR	TGVQTFR			Q20170801-09	50.7418	282	0.0045	1	1224	138347	HUMAN	Coatomer subunit alpha
[536]		Q5JTV8	TOIP1_HUMAN	1	1.9	2.02	2.6e-06	642.82	2	208909	0.25	GYQK	TPQEWAPQTAR			Q20170801-09	90.1161	286	2.6e-06	1	583	66248.9	HUMAN	Torsin-1A-interacting protein 1
[537]		Q96KP4	CNDP2_HUMAN	1	2.3	2.02	2.6e-06	617.328	2	765887	0.97	RAMK	TVFGVEPDLTR			Q20170801-09	156.501	403	2.6e-06	1	475	52878.9	HUMAN	Cytosolic non-specific dipeptidase
[538]		Q6P2E9	EDC4_HUMAN	2	1.4	1.7	8.9e-06	570.294	2	121038	0.94	AELR	HSQEELLQR			Q20170801-09	55.5503	966	8.9e-06	1	1401	151662	HUMAN	Enhancer of mRNA-decapping protein 4
[538]		Q6P2E9	EDC4_HUMAN	2	1.4	1.7	8.9e-06	585.814	2	248677	1.9	TGLR	TMPPINLQEK			Q20170801-09	127.282	68	0.0037	1	1401	151662	HUMAN	Enhancer of mRNA-decapping protein 4
[539]		Q00325	MPCP_HUMAN	2	5.2	1.48	4.3e-05	681.363	2	275365	0.83	AKVR	IQTQPGYANTLR			Q20170801-09	99.4279	190	4.3e-05	1	362	40095.2	HUMAN	Phosphate carrier protein, mitochondrial
[539]		Q00325	MPCP_HUMAN	2	5.2	1.48	4.3e-05	412.232	2	231169	0.89	CFER	TVEALYK			Q20170801-09	70.0373	241	0.0032	1	362	40095.2	HUMAN	Phosphate carrier protein, mitochondrial
[540]		P36915	GNL1_HUMAN	1	1.6	1.93	1.1e-05	508.298	2	307830	-0.54	NVGK	SSLINGLVGR			Q20170801-09	147.551	374	1.1e-05	1	607	68661.4	HUMAN	Guanine nucleotide-binding protein-like 1
[541]		Q71RC2	LARP4_HUMAN	1	1.2	1.88	1.3e-05	553.317	2	471950	2.3	-ML	LFVEQVASK		Abu@N-term	Q20170801-09	136.42	3	1.3e-05	1	724	80596.7	HUMAN	La-related protein 4
[542]		Q9UG63	ABCF2_HUMAN	1	1.8	1.75	6.1e-06	552.825	2	414980	0.86	SGRR	YGLIGLNGIGK			Q20170801-09	169.924	114	6.1e-06	1	623	71290.9	HUMAN	ATP-binding cassette sub-family F member 2
[543]		P08243	ASNS_HUMAN	2	2	1.21	3.5e-05	406.899	3	95255	-0.091	PSAR	TLTHYKSAVKA			Q20170801-09	50.2696	551	3.5e-05	1	561	64370.5	HUMAN	Asparagine synthetase [glutamine-hydrolyzing]
[543]		P08243	ASNS_HUMAN	2	2	1.21	3.5e-05	381.71	2	147722	-2.1	PSAR	TLTHYK			Q20170801-09	15.3656	551	0.00069	1	561	64370.5	HUMAN	Asparagine synthetase [glutamine-hydrolyzing]
[544]		Q6GYQ0	RGPA1_HUMAN	1	0.6	1.73	7.8e-06	678.359	2	116138	-4	VRQK	TVDIDDAQILPR			Q20170801-09	161.966	754	7.8e-06	1	2036	229834	HUMAN	Ral GTPase-activating protein subunit alpha-1
[545]		Q06546	GABPA_HUMAN	1	2.6	1.71	7.5e-06	654.351	2	317135	-0.51	CDLK	TLIGYSAAELNR			Q20170801-09	147.759	405	7.5e-06	1	454	51295.6	HUMAN	GA-binding protein alpha chain
[546]		P62081	RS7_HUMAN	1	3.6	1.7	8.5e-06	421.707	2	1060000	-0.26	-	MFSSSAK		Abu@N-term	Q20170801-09	46.4617	1	8.5e-06	1	194	22127	HUMAN	40S ribosomal protein S7
[547]		P12270	TPR_HUMAN	1	0.5	1.7	7.5e-06	698.83	2	67113	5.6	LMKK	TETMNVVMETNK			Q20170801-09	108.596	1266	7.5e-06	1	2363	267295	HUMAN	Nucleoprotein TPR
[548]		P47755	CAZA2_HUMAN	1	2.4	1.69	9.7e-06	452.748	2	193424	-0.11	PVTR	TKIDWNK			Q20170801-09	49.1913	267	9.7e-06	2	286	32949.4	HUMAN	F-actin-capping protein subunit alpha-2
[549]		Q06587	RING1_HUMAN	1	3.4	1.68	0.00011	829.449	2	99152	0.2	VSKR	SLRPDPNFDALISK		Abu@N-term	Q20170801-09	167.388	96	0.00011	2	406	42429.6	HUMAN	E3 ubiquitin-protein ligase RING1
[550]		P16383	GCFC2_HUMAN	1	1.4	1.65	9.2e-06	702.365	2	155296	3.7	VDEK	TQWILEEIESR			Q20170801-09	188.119	398	9.2e-06	1	781	89385.4	HUMAN	GC-rich sequence DNA-binding factor 2
[551]		P63010	AP2B1_HUMAN	2	1.7	0.99	0.00014	442.274	2	375176	0.77	VAPK	AVWLPAVK			Q20170801-09	152.456	712	0.00014	1	937	104554	HUMAN	AP-2 complex subunit beta
[551]		P63010	AP2B1_HUMAN	2	1.7	0.99	0.00014	410.223	2	160089	-0.39	YVRK	TAAVCVAK	Carbamidomethyl@5		Q20170801-09	29.0993	140	0.00059	2	937	104554	HUMAN	AP-2 complex subunit beta
[552]		P62906	RL10A_HUMAN	2	9.7	1.14	0.00036	495.606	3	370562	1.6	KLAK	KYDAFLASESLIK			Q20170801-09	167.897	106	0.00036	1	217	24831.5	HUMAN	60S ribosomal protein L10a
[552]		P62906	RL10A_HUMAN	2	9.7	1.14	0.00036	406.255	2	618743	-0.15	QIPR	ILGPGLNK			Q20170801-09	82.1379	123	0.0062	1	217	24831.5	HUMAN	60S ribosomal protein L10a
[553]		Q9Y3B3	TMED7_HUMAN	1	4.5	1.61	8.4e-05	422.547	3	164827	0.18	EALK	SVIDYQTHFR			Q20170801-09	115.931	160	8.4e-05	1	224	25171.8	HUMAN	Transmembrane emp24 domain-containing protein 7
[554]		Q9Y4W6	AFG32_HUMAN	2	2	1.25	2.3e-05	515.259	2	111401	-1.5	INQK	HFEQAIER			Q20170801-09	54.8871	544	2.3e-05	1	797	88584.4	HUMAN	AFG3-like protein 2
[554]		Q9Y4W6	AFG32_HUMAN	2	2	1.25	2.3e-05	437.766	2	261301	0.36	AYKR	TVALLTEK			Q20170801-09	95.8321	712	0.0011	1	797	88584.4	HUMAN	AFG3-like protein 2
[555]		O43837	IDH3B_HUMAN	1	2.3	1.61	4e-05	491.764	2	65026	-1.4	TGAR	HPFAQAVGR			Q20170801-09	53.969	309	4e-05	1	385	42184.1	HUMAN	Isocitrate dehydrogenase [NAD] subunit beta, mitochondrial
[556]		A4D1F6	LRRD1_HUMAN	2	0.8	1.45	0.00016	460.272	2	4640000	0.61	DKIT	ALNLFTR		Abu@N-term	Q20170801-07	159.537	850	0.00016	1	860	98036.1	HUMAN	Leucine-rich repeat and death domain-containing protein 1
[556]		A4D1F6	LRRD1_HUMAN	2	0.8	1.45	0.00016	382.227	2	237837	-0.26	KITA	LNLFTR			Q20170801-07	124.218	851	0.041	4	860	98036.1	HUMAN	Leucine-rich repeat and death domain-containing protein 1
[557]		Q9BZZ5	API5_HUMAN	1	1.7	1.59	1.2e-05	503.764	2	273134	0.82	-	MPTVEELYR		Met-loss@1	Q20170801-09	109.074	1	1.2e-05	1	524	59005.1	HUMAN	Apoptosis inhibitor 5
[558]		Q9UQE7	SMC3_HUMAN	2	1.6	0.94	0.00014	587.283	2	110016	4.4	VSHR	GALTGGYYDTR			Q20170801-09	96.074	662	0.00014	1	1217	141543	HUMAN	Structural maintenance of chromosomes protein 3
[558]		Q9UQE7	SMC3_HUMAN	2	1.6	0.94	0.00014	492.264	2	286788	0.27	GFSR	SNPYYIVK			Q20170801-09	102.227	133	0.00047	1	1217	141543	HUMAN	Structural maintenance of chromosomes protein 3
[559]		O95292	VAPB_HUMAN	1	3.3	1.57	8.1e-05	437.748	2	393028	0.77	TASK	TETPIVSK			Q20170801-09	45.0557	148	8.1e-05	1	243	27228.6	HUMAN	Vesicle-associated membrane protein-associated protein B/C
[560]		P17096	HMGA1_HUMAN	1	16.8	1.56	1.5e-05	617.31	3	53347	0.66	-	MSESSSKSSQPLASKQEK		Met-loss+Acetyl@1	Q20170801-09	29.7489	1	1.5e-05	1	107	11676.1	HUMAN	High mobility group protein HMG-I/HMG-Y
[561]		Q9BPW8	NIPS1_HUMAN	1	3.5	1.54	1.6e-05	437.542	3	542445	-0.14	ARFY	SKDNEGSWFR		Abu@N-term	Q20170801-07	90.629	36	1.6e-05	1	284	33310.3	HUMAN	Protein NipSnap homolog 1
[562]		Q86WG5	MTMRD_HUMAN	2	1.4	1.26	0.00011	721.405	2	479460	-1.1	EAKV	SGLIQPAEVFAPK		Abu@N-term	Q20170801-09	190.706	107	0.00011	1	1849	208466	HUMAN	Myotubularin-related protein 13
[562]		Q86WG5	MTMRD_HUMAN	2	1.4	1.26	0.00011	715.416	2	33580	3.7	LSSP	TPFIIGVHSVFK		Abu@N-term	Q20170801-09	93.6868	270	0.0079	1	1849	208466	HUMAN	Myotubularin-related protein 13
[563]		P20366	TKN1_HUMAN	2	14	1.21	0.00023	736.716	3	213784	2.1	DWYD	SDQIKEELPEPFEHLLQR			Q20170801-07	100.739	37	0.00023	1	129	15003.3	HUMAN	Protachykinin-1
[563]		P20366	TKN1_HUMAN	2	14	1.21	0.00023	707.706	3	88246	2.1	WYDS	DQIKEELPEPFEHLLQR			Q20170801-09	94.4217	38	0.03	1	129	15003.3	HUMAN	Protachykinin-1
[564]		P39656	OST48_HUMAN	1	2	1.51	4.5e-05	523.803	2	260211	-0.2	IVGK	SSLNPILFR			Q20170801-07	164.194	190	4.5e-05	1	456	50801.2	HUMAN	Dolichyl-diphosphooligosaccharide--protein glycosyltransferase 48 kDa subunit
[565]		Q8NBF2	NHLC2_HUMAN	1	1.4	1.48	0.00038	509.301	2	91195	0.41	STVR	TVSLKDGAVK			Q20170801-09	49.1977	438	0.00038	1	726	79444.3	HUMAN	NHL repeat-containing protein 2
[566]		P55060	XPO2_HUMAN	2	2.4	1.04	0.00032	526.958	3	697444	0.51	YLKK	TLDPDPAIRRPAEK			Q20170801-09	81.2882	18	0.00032	1	971	110418	HUMAN	Exportin-2
[566]		P55060	XPO2_HUMAN	2	2.4	1.04	0.00032	552.798	2	325933	2	ICEK	VIVPNMEFR			Q20170801-09	158.483	347	0.0046	1	971	110418	HUMAN	Exportin-2
[567]		Q12756	KIF1A_HUMAN	1	0.7	1.45	2.2e-05	615.339	2	77823	-1.6	PFPR	TIVAVEVQDQK			Q20170801-09	101.525	783	2.2e-05	1	1690	191066	HUMAN	Kinesin-like protein KIF1A
[568]		Q9BYD3	RM04_HUMAN	1	2.9	1.44	0.00012	509.762	2	143791	-0.04	SQGL	SSLAEEAAR		Abu@N-term	Q20170801-09	54.3395	22	0.00012	1	311	34919.5	HUMAN	39S ribosomal protein L4, mitochondrial
[569]		O60427	FADS1_HUMAN	2	2.3	0.89	0.00012	389.867	3	275164	-0.42	RELR	ATVERMGLMK		Oxidation@6;Oxidation@9	Q20170801-09	113.424	117	0.00012	1	444	51964.7	HUMAN	Fatty acid desaturase 1
[569]		O60427	FADS1_HUMAN	2	2.3	0.89	0.00012	384.535	3	8010000	0.3	RELR	ATVERMGLMK		Oxidation@6'10	Q20170801-09	113.527	117	0.00062	1	444	51964.7	HUMAN	Fatty acid desaturase 1
[570]		Q14147	DHX34_HUMAN	1	1	1.37	7.9e-05	406.239	3	178028	4.6	EIRR	VALDSLVLQMK			Q20170801-07	95.4999	523	7.9e-05	1	1143	128121	HUMAN	Probable ATP-dependent RNA helicase DHX34
[571]		P00734	THRB_HUMAN	1	2.6	1.34	6.2e-05	899.441	2	195532	-2.9	RSEG	SSVNLSPPLEQCVPDR	Carbamidomethyl@12		Q20170801-09	168.731	202	6.2e-05	1	622	70037.5	HUMAN	Prothrombin
[572]		Q13614	MTMR2_HUMAN	2	3.6	0.93	0.00012	718.905	2	49248	1.9	YPAL	LVVPANIPDEELK			Q20170801-07	145.445	244	0.00012	1	643	73381.8	HUMAN	Myotubularin-related protein 2
[572]		Q13614	MTMR2_HUMAN	2	3.6	0.93	0.00012	411.531	3	285478	-0.11	LTSL	AMLMLDGYYR			Q20170801-07	60.7146	431	0.0011	1	643	73381.8	HUMAN	Myotubularin-related protein 2
[573]		Q07820	MCL1_HUMAN	1	5.1	1.26	8.3e-05	514.27	3	69093	1.3	NLYC	GGAGLGAGSGGATRPGGR		Abu@N-term	Q20170801-07	52.6036	17	8.3e-05	1	350	37337.7	HUMAN	Induced myeloid leukemia cell differentiation protein Mcl-1
[574]		Q15758	AAAT_HUMAN	1	1.8	1.23	0.00018	572.317	2	365183	1	TESR	STEPELIQVK			Q20170801-09	118.607	493	0.00018	1	541	56598.8	HUMAN	Neutral amino acid transporter B(0)
[575]		Q96DI7	SNR40_HUMAN	1	2	1.23	0.00027	509.278	2	100654	-1.5	-	MIEQQKR		Abu@N-term	Q20170801-09	20.6381	1	0.00027	1	357	39310.9	HUMAN	U5 small nuclear ribonucleoprotein 40 kDa protein
[576]		P54920	SNAA_HUMAN	1	3.4	1.22	0.00014	588.28	2	166474	-0.47	RIKK	TIQGDEEDLR			Q20170801-09	74.8199	286	0.00014	1	295	33233	HUMAN	Alpha-soluble NSF attachment protein
[577]		Q12789	TF3C1_HUMAN	1	0.5	1.21	0.00021	636.353	2	167841	-0.31	VISK	TVPPVDIVFER			Q20170801-09	177.902	356	0.00021	1	2109	238877	HUMAN	General transcription factor 3C polypeptide 1
[578]		Q6SJ96	TBPL2_HUMAN	1	2.7	1.21	0.00021	586.793	2	621850	-1.1	DLSF	LPDEVTQENK			Q20170801-09	117.825	102	0.00021	1	375	41524.8	HUMAN	TATA box-binding protein-like protein 2
[579]		Q16527	CSRP2_HUMAN	2	14	0.97	3e-05	735.858	2	168088	-3.9	LEST	TLTEKEGEIYCK	Carbamidomethyl@11		Q20170801-09	116.304	157	3e-05	1	193	20954.1	HUMAN	Cysteine and glycine-rich protein 2
[579]		Q16527	CSRP2_HUMAN	2	14	0.97	3e-05	492.558	3	47799	-3.1	-	MPVWGGGNKCGACGR	Carbamidomethyl@10;Carbamidomethyl@13	Met-loss@1	Q20170801-09	56.3477	1	0.00074	1	193	20954.1	HUMAN	Cysteine and glycine-rich protein 2
[580]		Q9NPQ8	RIC8A_HUMAN	1	1.9	1.19	8.1e-05	396.545	3	312278	-0.84	RDVR	TRPEVGEMLR			Q20170801-09	94.3593	365	8.1e-05	1	531	59710.1	HUMAN	Synembryn-A
[581]		decoy	decoy	2	0.3	0.67	0.0012	416.221	2	1160000	-1.1	GMGH	SEHLFAK			Q20170801-07	54.9633	48	0.0012	1	2997	335930	HUMAN	Chromodomain-helicase-DNA-binding protein 7
[581]		decoy	decoy	2	0.3	0.67	0.0012	621.309	2	403980	0.94	ELEG	MGHSEHLFAK		Abu@N-term	Q20170801-07	122.796	45	0.0022	1	2997	335930	HUMAN	Chromodomain-helicase-DNA-binding protein 7
[582]		P48047	ATPO_HUMAN	1	5.6	1.18	8.9e-05	629.845	2	152872	-0.21	LEAK	TDPSILGGMIVR			Q20170801-09	175.892	177	8.9e-05	1	213	23277.5	HUMAN	ATP synthase subunit O, mitochondrial
[583]		Q9BWH6	RPAP1_HUMAN	1	0.7	1.17	8e-05	595.831	2	242712	1.2	SGKR	SIFAQEIAAR		Abu@N-term	Q20170801-09	152.225	150	8e-05	1	1393	152756	HUMAN	RNA polymerase II-associated protein 1
[584]		Q9UKF6	CPSF3_HUMAN	1	1.3	1.17	0.00015	516.277	2	89259	-1.3	VDGK	TANLNLETR			Q20170801-07	81.5407	643	0.00015	1	684	77486.7	HUMAN	Cleavage and polyadenylation specificity factor subunit 3
[585]		P23921	RIR1_HUMAN	2	1.9	1.16	2.5e-05	452.224	2	516966	2	QGLK	TGMYYLR			Q20170801-09	108.868	734	2.5e-05	1	792	90071	HUMAN	Ribonucleoside-diphosphate reductase large subunit
[585]		P23921	RIR1_HUMAN	2	1.9	1.16	2.5e-05	495.767	2	291074	0.69	QLYK	TVWEISQK			Q20170801-09	107.895	682	0.0035	1	792	90071	HUMAN	Ribonucleoside-diphosphate reductase large subunit
[586]		Q86V21	AACS_HUMAN	1	1.3	1.15	9.4e-05	452.258	2	318890	0.089	INPK	TGGIVMLGR			Q20170801-09	117.932	531	9.4e-05	1	672	75144.9	HUMAN	Acetoacetyl-CoA synthetase
[587]		O00743	PPP6_HUMAN	1	3	1.14	0.00023	453.745	2	572051	0.33	ISPR	GAGWLFGAK			Q20170801-09	157.444	211	0.00023	1	305	35144.6	HUMAN	Serine/threonine-protein phosphatase 6 catalytic subunit
[588]		Q00341	VIGLN_HUMAN	2	1.3	0.9	0.00014	558.326	2	109238	2.4	ENER	TKDLIIEQR			Q20170801-09	74.2761	509	0.00014	1	1268	141457	HUMAN	Vigilin
[588]		Q00341	VIGLN_HUMAN	2	1.3	0.9	0.00014	419.226	2	252993	-1.1	KQTK	SFTVDIR			Q20170801-09	120.132	727	0.0023	1	1268	141457	HUMAN	Vigilin
[589]		Q7Z589	EMSY_HUMAN	2	2	0.7	0.001	875.116	3	1520000	0.84	LPKP	VTATLPTSSNSPIMVVSSNGAIMTTK		Oxidation@14'10	Q20170801-09	139.374	473	0.001	1	1322	141469	HUMAN	BRCA2-interacting transcriptional repressor EMSY
[589]		Q7Z589	EMSY_HUMAN	2	2	0.7	0.001	875.116	3	2690000	0.28	LPKP	VTATLPTSSNSPIMVVSSNGAIMTTK		Oxidation@14|23	Q20170801-09	141.486	473	0.0036	1	1322	141469	HUMAN	BRCA2-interacting transcriptional repressor EMSY
[590]		Q8NI27	THOC2_HUMAN	1	0.5	1.07	0.00055	449.232	2	241891	-0.29	LKAE	GGYFGQIR			Q20170801-07	108.782	713	0.00055	1	1593	182776	HUMAN	THO complex subunit 2
[591]		O75717	WDHD1_HUMAN	2	2.1	0.68	7.3e-05	745.364	2	48117	-0.6	MLNR	GLGNTWTPICNTR	Carbamidomethyl@10		Q20170801-09	147.175	653	7.3e-05	1	1129	125968	HUMAN	WD repeat and HMG-box DNA-binding protein 1
[591]		O75717	WDHD1_HUMAN	2	2.1	0.68	7.3e-05	705.828	2	49920	1	QRPK	TGFQMWLEENR			Q20170801-09	177.071	1020	0.00026	1	1129	125968	HUMAN	WD repeat and HMG-box DNA-binding protein 1
[592]		Q9H3N1	TMX1_HUMAN	1	3.9	0.94	0.0011	538.284	2	543210	-1.6	IRQR	SLGPSLATDKS			Q20170801-09	88.2701	270	0.0011	1	280	31791.5	HUMAN	Thioredoxin-related transmembrane protein 1
[593]		Q8IY81	SPB1_HUMAN	1	0.9	0.92	0.00037	469.751	2	629543	0.15	LYHR	TSVTDFLR			Q20170801-09	154.203	252	0.00037	1	847	96559.3	HUMAN	pre-rRNA processing protein FTSJ3
[594]		decoy	decoy	1	3.9	0.89	0.00037	842.434	3	231664	5	TTKI	VHAQDRPESPLSDLKYLGDGSR		Abu@N-term	Q20170801-07	132.679	5	0.00037	1	565	65381.1	HUMAN	U4/U6.U5 tri-snRNP-associated protein 2
[595]		decoy	decoy	1	5.1	0.88	0.0011	616.052	4	312671	4.7	DYNG	LASGLSWGGLGPTYQHDGVSESSR			Q20170801-09	115.778	84	0.0011	1	468	51278.7	HUMAN	Transmembrane protein 151A
[596]		Q7Z401	MYCPP_HUMAN	1	0.4	0.88	0.00051	465.257	2	176802	2.2	LTSR	TPSIDLQR			Q20170801-09	92.5389	1223	0.00051	1	1863	209246	HUMAN	C-myc promoter-binding protein
[597]		Q5KU26	COL12_HUMAN	1	1.3	0.86	0.00037	573.808	2	118774	-1.9	HHLR	TLTSNLNEVR			Q20170801-09	99.7351	359	0.00037	1	742	81515.8	HUMAN	Collectin-12
[598]		P61313	RL15_HUMAN	1	4.4	0.81	0.00068	509.762	2	189017	1.1	KFAR	SLQSVAEER			Q20170801-09	70.1235	97	0.00068	1	204	24146.3	HUMAN	60S ribosomal protein L15
[599]		decoy	decoy	1	0.8	0.8	0.00035	361.184	3	1050000	-1.5	AGKI	GSLMAAKMEK		Oxidation@4'7	Q20170801-09	32.8365	676	0.00035	1	1270	141398	HUMAN	Microtubule-associated tumor suppressor 1
[600]		Q93008	USP9X_HUMAN	1	0.3	0.75	0.0012	409.234	2	301592	0.54	HEER	TILPMSR			Q20170801-07	103.112	873	0.0012	1	2570	292282	HUMAN	Probable ubiquitin carboxyl-terminal hydrolase FAF-X
[601]		Q92747	ARC1A_HUMAN	1	2.7	0.73	0.00071	552.308	2	281338	2.9	WDFK	TLESSIQGLR			Q20170801-09	131.991	359	0.00071	1	370	41569.7	HUMAN	Actin-related protein 2/3 complex subunit 1A
[602]		O43175	SERA_HUMAN	1	1.7	0.71	0.0014	450.288	2	773377	0.93	LNGK	TLGILGLGR			Q20170801-09	168.273	147	0.0014	2	533	56651	HUMAN	D-3-phosphoglycerate dehydrogenase
[603]		Q13938	CAYP1_HUMAN	1	8.5	0.69	0.016	854.437	2	482399	-0.013	DRSG	DGVVTVDDLRGVYSGR			Q20170801-09	118.517	110	0.016	1	189	20967.6	HUMAN	Calcyphosin
[604]		decoy	decoy	1	0.5	0.65	0.00089	789.381	2	481293	-3.1	PMVE	TSNDAKQDQCVVK	Carbamidomethyl@10	Abu@N-term	Q20170801-07	118.558	543	0.00089	1	2542	271615	HUMAN	Talin-2
[605]		Q9UMN6	KMT2B_HUMAN	1	0.3	0.54	0.001	445.74	2	3900000	-0.018	HPAC	LGPSYPTR			Q20170801-07	88.2494	1280	0.001	1	2715	293517	HUMAN	Histone-lysine N-methyltransferase 2B
[606]		P10827	THA_HUMAN	2	4.3	0.41	0.004	808.409	3	1570000	-4.3	SLRA	AVRYDPESDTLTLSGEMAVKR		Abu@N-term	Q20170801-07	134.578	264	0.004	1	490	54816.1	HUMAN	Thyroid hormone receptor alpha
[606]		P10827	THA_HUMAN	2	4.3	0.41	0.004	784.731	3	330477	-3.3	LRAA	VRYDPESDTLTLSGEMAVKR		Abu@N-term	Q20170801-07	132.914	265	0.016	1	490	54816.1	HUMAN	Thyroid hormone receptor alpha
[607]		Q96LR9	APLD1_HUMAN	1	9	0.5	0.0051	663.6	4	236204	-1.9	VGLG	VATAGGAVTITSDLSLIFCNSRELR	Carbamidomethyl@19		Q20170801-07	119.877	125	0.0051	1	279	30546.7	HUMAN	Apolipoprotein L domain-containing protein 1
[608]		P42263	GRIA3_HUMAN	1	1.2	0.48	0.0018	672.353	2	858524	4.7	IVVT	TILESPYVMYK			Q20170801-09	101.004	429	0.0018	1	894	101158	HUMAN	Glutamate receptor 3
[609]		Q96HP4	OXND1_HUMAN	1	2.2	0.48	0.013	386.252	2	621558	-0.17	EQER	VIELAVK			Q20170801-07	102.373	125	0.013	1	312	34854.8	HUMAN	Oxidoreductase NAD-binding domain-containing protein 1
[610]		Q3B8N5	PROX2_HUMAN	1	1.2	0.45	0.002	412.74	2	137660	-1.6	DPPG	HLTQLGR			Q20170801-09	24.492	252	0.002	1	592	65586.4	HUMAN	Prospero homeobox protein 2
[611]		decoy	decoy	1	0.9	0.44	0.0018	633.328	2	232693	-1.6	IVSD	LGLESQMTKSR		Oxidation@7	Q20170801-07	78.0571	152	0.0018	1	1248	141841	HUMAN	Apoptotic protease-activating factor 1
[612]		Q9Y5K1	SPO11_HUMAN	1	2.8	0.41	0.0052	624.343	2	541411	-5.6	NFCN	KLSPCIMITGK	Carbamidomethyl@5		Q20170801-09	135.684	240	0.0052	1	396	44537.2	HUMAN	Meiotic recombination protein SPO11
[613]		P53007	TXTP_HUMAN	1	2.6	0.38	0.0021	501.765	2	590255	0.47	EYVK	TQLQLDER			Q20170801-09	75.6789	51	0.0021	1	311	34013	HUMAN	Tricarboxylate transport protein, mitochondrial
[614]		Q99497	PARK7_HUMAN	1	3.7	0.37	0.0031	406.784	2	1820000	0.89	ASKR	ALVILAK		Abu@N-term	Q20170801-07	137.109	6	0.0031	1	189	19891.2	HUMAN	Protein DJ-1
[615]		Q8N143	BCL6B_HUMAN	1	2.3	0.37	0.0054	537.779	2	411419	-2	LNSQ	ASQAGSLVGER			Q20170801-07	35.3864	206	0.0054	1	479	51531.8	HUMAN	B-cell CLL/lymphoma 6 member B protein
[616]		P08922	ROS1_HUMAN	1	0.9	0.34	0.0029	808.079	3	446003	-3.3	LVNF	ATLGCLWISVVQCTVLNSCLK	Carbamidomethyl@5;Carbamidomethyl@13;Carbamidomethyl@19		Q20170801-09	122.905	15	0.0029	1	2347	263918	HUMAN	Proto-oncogene tyrosine-protein kinase ROS
[617]		Q9BRB3	PIGQ_HUMAN	1	1.4	0.32	0.005	438.589	3	869578	-0.61	SEGV	EASILAELARR		Abu@N-term	Q20170801-07	179.594	197	0.005	1	760	84083	HUMAN	Phosphatidylinositol N-acetylglucosaminyltransferase subunit Q
[618]		P42336	PK3CA_HUMAN	1	0.7	0.3	0.0029	460.763	2	3520000	-2.3	IYDA	AIDLFTR		Abu@N-term	Q20170801-07	164.967	893	0.0029	2	1068	124285	HUMAN	Phosphatidylinositol 4,5-bisphosphate 3-kinase catalytic subunit alpha isoform
[619]		Q8NFC6	BD1L1_HUMAN	1	0.8	0.29	0.011	861.11	3	366238	-3	GNGD	LSATEVSKHKVPMPSLIAENNCR	Carbamidomethyl@22		Q20170801-09	119.21	2363	0.011	1	3051	330469	HUMAN	Biorientation of chromosomes in cell division protein 1-like 1
[620]		decoy	decoy	1	4.9	0.28	0.0039	883.768	3	822180	6	DHGV	DTFSSDVTRGQVDVSKHPPFAACK	Carbamidomethyl@23		Q20170801-09	186.902	376	0.0039	1	492	55816.6	HUMAN	Alpha-(1,3)-fucosyltransferase 11
[621]		decoy	decoy	1	4.3	0.23	0.0054	707.704	3	554603	0.53	QKGR	ALAAPMPGWTAWAPRHFR		Abu@N-term	Q20170801-09	107.499	333	0.0054	1	421	47432.6	HUMAN	WD repeat and SOCS box-containing protein 1
[622]		decoy	decoy	1	0.1	0.21	0.0058	367.227	2	742578	-1.2	PQAR	RIAFAR			Q20170801-07	55.1998	792	0.0058	1	4684	531795	HUMAN	Plectin
[623]		O95985	TOP3B_HUMAN	1	2.9	0.21	0.0043	875.113	3	1070000	5.1	YFVD	SIAGMDELMEVSFSPLAATGKPLSR		Oxidation@9'34	Q20170801-09	140.418	599	0.0043	1	862	96662.9	HUMAN	DNA topoisomerase 3-beta-1
[624]		P10619	PPGB_HUMAN	1	1.5	0.19	0.0052	410.738	2	1730000	0.14	VVQD	LGNIFTR			Q20170801-07	133.047	301	0.0052	1	480	54466.6	HUMAN	Lysosomal protective protein
[625]		P41091	IF2G_HUMAN	1	1.7	0.17	0.0051	471.78	2	2150000	0.47	KHWR	LIGWGQIR			Q20170801-09	154.157	453	0.0051	2	472	51109.9	HUMAN	Eukaryotic translation initiation factor 2 subunit 3
[626]		Q16853	AOC3_HUMAN	1	0.9	0.17	0.0093	405.237	2	10400000	0.66	REAL	AIVFFGR			Q20170801-09	158.405	126	0.0093	1	763	84622.6	HUMAN	Membrane primary amine oxidase
[627]		decoy	decoy	1	13.8	0.09	0.008	646.086	4	1910000	4.4	HGEI	DATSDSSQNETSYALLGQKLVIR		Abu@N-term	Q20170801-09	118.297	57	0.008	1	167	18334.8	HUMAN	Golgin subfamily A member 7B
[628]		decoy	decoy	1	4	0.06	0.01	636.34	4	2190000	3.8	LQQQ	GSKTELSLTHWELVPDKFNQK		Abu@N-term	Q20170801-09	127.586	134	0.01	1	530	59636.3	HUMAN	Inactive ubiquitin carboxyl-terminal hydrolase 17-like protein 4

## Sheet: ZVP-N-termini-abu.txt
Acc number	Uniprot ID	Intensity	P4'-P1	Peptide sequence	Start site	Protein name
P61981	1433G_HUMAN	296619	-	MVDREQLVQK	1	14-3-3 protein gamma
P51398	RT29_HUMAN	208871	QARQ	SIAAHLDNQVPVESPR	31	28S ribosomal protein S29, mitochondrial
Q6NVY1	HIBCH_HUMAN	554948	LRMS	KHTDAAEEVLLEK	30	3-hydroxyisobutyryl-CoA hydrolase, mitochondrial
Q13405	RM49_HUMAN	50416	LRLL	SQTQGPPDYPR	27	39S ribosomal protein L49, mitochondrial
Q13405	RM49_HUMAN	86484	GLRL	LSQTQGPPDYPR	26	39S ribosomal protein L49, mitochondrial
Q9BYD3	RM04_HUMAN	143791	SQGL	SSLAEEAAR	22	39S ribosomal protein L4, mitochondrial
Q9H0U6	RM18_HUMAN	516295	FAAL	STSSEPAAKPEVDPVENEAVAPEFTNRNPR	25	39S ribosomal protein L18, mitochondrial
Q9H2W6	RM46_HUMAN	628768	SRSL	ALAAAPSSNGSPWR	33	39S ribosomal protein L46, mitochondrial
P60866	RS20_HUMAN	264928	-M	AFKDTGKTPVEPEVAIHR	2	40S ribosomal protein S20
P62081	RS7_HUMAN	1060000	-	MFSSSAK	1	40S ribosomal protein S7
P10809	CH60_HUMAN	149708	ADAV	AVTMGPK	52	60 kDa heat shock protein, mitochondrial
P10809	CH60_HUMAN	232899	VGRK	GVITVKDGK	197	60 kDa heat shock protein, mitochondrial
P10809	CH60_HUMAN	434980	VLAR	SIAKEGFEK	122	60 kDa heat shock protein, mitochondrial
P10809	CH60_HUMAN	495208	TVAK	SIDLKDKYK	83	60 kDa heat shock protein, mitochondrial
P46777	RL5_HUMAN	141472	-M	GFVKVVKNK	2	60S ribosomal protein L5
O76080	ZFAN5_HUMAN	72717	TPGP	MLCSTGCGFYGNPR	12	AN1-type zinc finger protein 5
P06576	ATPB_HUMAN	488359	VRDY	AAQTSPSPKAGAATGR	47	ATP synthase subunit beta, mitochondrial
O76031	CLPX_HUMAN	149484	KGRR	AAAAADLANR	453	ATP-dependent Clp protease ATP-binding subunit clpX-like, mitochondrial
Q08211	DHX9_HUMAN	243702	DRAA	ECNIVVTQPR	437	ATP-dependent RNA helicase A
Q86XP3	DDX42_HUMAN	56318	QSHS	AFGATSSSSGFGK	38	ATP-dependent RNA helicase DDX42
Q9UII2	ATIF1_HUMAN	961415	ARGF	GSDQSENVDRGAGSIR	26	ATPase inhibitor, mitochondrial
Q9BWD1	THIC_HUMAN	301604	STRK	GLIEVKTDEFPR	212	Acetyl-CoA acetyltransferase, cytosolic
P63261	ACTG_HUMAN	206899	EEIA	ALVIDNGSGMCK	7	Actin, cytoplasmic 2
P63261	ACTG_HUMAN	238605	EIAA	LVIDNGSGMCK	8	Actin, cytoplasmic 2
P63261	ACTG_HUMAN	268665	GQKD	SYVGDEAQSKR	52	Actin, cytoplasmic 2
P63261	ACTG_HUMAN	338404	MVGM	GQKDSYVGDEAQSKR	48	Actin, cytoplasmic 2
P63261	ACTG_HUMAN	42465	GMCK	AGFAGDDAPR	19	Actin, cytoplasmic 2
P63261	ACTG_HUMAN	442568	MCKA	GFAGDDAPR	20	Actin, cytoplasmic 2
P63261	ACTG_HUMAN	450391	QSKR	GILTLK	63	Actin, cytoplasmic 2
P68133	ACTS_HUMAN	155276	IMKC	DIDIRKDLYANNVMSGGTTMYPGIADR	288	Actin, alpha skeletal muscle
P68133	ACTS_HUMAN	268665	GQKD	SYVGDEAQSKR	54	Actin, alpha skeletal muscle
P68133	ACTS_HUMAN	338404	MVGM	GQKDSYVGDEAQSKR	50	Actin, alpha skeletal muscle
P68133	ACTS_HUMAN	42465	GLVK	AGFAGDDAPR	21	Actin, alpha skeletal muscle
P68133	ACTS_HUMAN	442568	LVKA	GFAGDDAPR	22	Actin, alpha skeletal muscle
P68133	ACTS_HUMAN	450391	QSKR	GILTLK	65	Actin, alpha skeletal muscle
P54819	KAD2_HUMAN	741268	-MAP	SVPAAEPEYPK	4	Adenylate kinase 2, mitochondrial
P30520	PURA2_HUMAN	123466	TTKK	GIGPVYSSK	165	Adenylosuccinate synthetase isozyme 2
P55196	AFAD_HUMAN	153430	LAKR	SVDGGLMVKGPR	512	Afadin
Q5JTZ9	SYAM_HUMAN	64934	WRGL	SHRPLSSEPPAAK	26	Alanine--tRNA ligase, mitochondrial
Q8NI60	COQ8A_HUMAN	427315	SFSA	MGFQR	156	Atypical kinase COQ8A, mitochondrial
Q8NI60	COQ8A_HUMAN	622016	QRRF	FHQDQSPVGGLTAEDIEK	163	Atypical kinase COQ8A, mitochondrial
Q676U5	A16L1_HUMAN	335955	FGRR	SVSSFPVPQDNVDTHPGSGKEVR	287	Autophagy-related protein 16-1
Q562R1	ACTBL_HUMAN	202478	ELSA	LVVDNGSGMCK	9	Beta-actin-like protein 2
O60271	JIP4_HUMAN	483849	VKKR	SSTLSQLPGDKSK	593	C-Jun-amino-terminal kinase-interacting protein 4
Q9NX58	LYAR_HUMAN	735387	-M	VFFTCNACGESVKK	2	Cell growth-regulating nucleolar protein
P45973	CBX5_HUMAN	128700	NKRK	SNFSNSADDIK	92	Chromobox protein homolog 5
Q13185	CBX3_HUMAN	51609	TKRK	SLSDSESDDSK	93	Chromobox protein homolog 3
P38432	COIL_HUMAN	227642	AKKR	AFQLEEGEETEPDCKYSK	113	Coilin
O75131	CPNE3_HUMAN	2640000	QKKK	SYKNSGVISVK	260	Copine-3
O75367	H2AY_HUMAN	399608	FVLF	DSESIGIYVQEMAK	355	Core histone macro-H2A.1
O00483	NDUA4_HUMAN	565585	YKFY	SVNVDYSK	66	Cytochrome c oxidase subunit NDUFA4
P09669	COX6C_HUMAN	381170	-	MAPEVLPKPR	1	Cytochrome c oxidase subunit 6C
P10606	COX5B_HUMAN	453425	MRSM	ASGGGVPTDEEQATGLER	32	Cytochrome c oxidase subunit 5B, mitochondrial
P20674	COX5A_HUMAN	1130000	VRCY	SHGSQETDEEFDAR	42	Cytochrome c oxidase subunit 5A, mitochondrial
Q9Y6G9	DC1L1_HUMAN	197677	SNVA	SVSPIPAGSKK	419	Cytoplasmic dynein 1 light intermediate chain 1
P09884	DPOLA_HUMAN	650738	KKKR	SIGASPNPFSVHTATAVPSGK	186	DNA polymerase alpha catalytic subunit
P27695	APEX1_HUMAN	126577	RGKK	GAVAEDGDELRTEPEAK	8	DNA-(apurinic or apyrimidinic site) lyase
P24928	RPB1_HUMAN	135814	-	MHGGGPPSGDSACPLR	1	DNA-directed RNA polymerase II subunit RPB1
Q5SXM8	DNLZ_HUMAN	66052	GWRR	SSSEQGPGPAAALGR	49	DNL-type zinc finger protein
P33316	DUT_HUMAN	1220000	PSKR	ARPAEVGGMQLR	104	Deoxyuridine 5'-triphosphate nucleotidohydrolase, mitochondrial
P33316	DUT_HUMAN	227179	LFNF	GKEKFEVK	205	Deoxyuridine 5'-triphosphate nucleotidohydrolase, mitochondrial
Q9NR28	DBLOH_HUMAN	104535	VTLC	AVPIAQKSEPHSLSSEALMR	56	Diablo homolog, mitochondrial
Q06587	RING1_HUMAN	99152	VSKR	SLRPDPNFDALISK	96	E3 ubiquitin-protein ligase RING1
P13639	EF2_HUMAN	170143	NRKR	GHVFEESQVAGTPMFVVK	768	Elongation factor 2
P30084	ECHM_HUMAN	223735	WRPF	ASGANFEYIIAEK	28	Enoyl-CoA hydratase, mitochondrial
Q04637	IF4G1_HUMAN	1070000	DKRR	GGPPGPPISR	1033	Eukaryotic translation initiation factor 4 gamma 1
Q04637	IF4G1_HUMAN	117421	NRFS	ALQQAVPTESTDNRR	1125	Eukaryotic translation initiation factor 4 gamma 1
Q04637	IF4G1_HUMAN	263685	ATKR	SFSKEVEER	1185	Eukaryotic translation initiation factor 4 gamma 1
P00367	DHE3_HUMAN	233380	RRHY	SEAVADREDDPNFFK	54	Glutamate dehydrogenase 1, mitochondrial
P30419	NMT1_HUMAN	284683	ASKR	SYQFWDTQPVPK	116	Glycylpeptide N-tetradecanoyltransferase 1
O75487	GPC4_HUMAN	892682	RISR	SISESAFSAR	355	Glypican-4
P07900	HS90A_HUMAN	643410	MKAQ	ALRDNSTMGYMAAK	618	Heat shock protein HSP 90-alpha
P08238	HS90B_HUMAN	101003	MKAQ	ALRDNSTMGYMMAK	610	Heat shock protein HSP 90-beta
P31943	HNRH1_HUMAN	509987	-M	MLGTEGGEGFVVK	2	Heterogeneous nuclear ribonucleoprotein H
Q00839	HNRPU_HUMAN	212929	EPGN	GSLDLGGDSAGR	58	Heterogeneous nuclear ribonucleoprotein U
Q00839	HNRPU_HUMAN	45017	TSLF	AVTVAPPGAR	195	Heterogeneous nuclear ribonucleoprotein U
Q9BX68	HINT2_HUMAN	175264	QVRG	AAGVTDGNEVAKAQQATPGGAAPTIFSR	31	Histidine triad nucleotide-binding protein 2, mitochondrial
Q92522	H1X_HUMAN	113220	-M	SVELEEALPVTTAEGMAK	2	Histone H1x
O00410	IPO5_HUMAN	87032	KEHI	MQMLQNPDWK	364	Importin-5
Q07820	MCL1_HUMAN	69093	NLYC	GGAGLGAGSGGATRPGGR	17	Induced myeloid leukemia cell differentiation protein Mcl-1
O14654	IRS4_HUMAN	69943	LKKR	SYFGKLTQSK	614	Insulin receptor substrate 4
P51553	IDH3G_HUMAN	162289	PSRN	IFSEQTIPPSAK	39	Isocitrate dehydrogenase [NAD] subunit gamma, mitochondrial
Q9UK76	JUPI1_HUMAN	100348	SNIF	GTPEENQASWAK	53	Jupiter microtubule associated homolog 1
Q9UK76	JUPI1_HUMAN	508753	FSLG	FDEPTEQPVRK	34	Jupiter microtubule associated homolog 1
Q7Z4H8	KDEL2_HUMAN	206034	LVAA	GAPEVLVSAPR	21	KDEL motif-containing protein 2
P05783	K1C18_HUMAN	148069	RPVS	SAASVYAGAGGSGSR	31	Keratin, type I cytoskeletal 18
P05783	K1C18_HUMAN	625707	GARP	VSSAASVYAGAGGSGSR	29	Keratin, type I cytoskeletal 18
P05783	K1C18_HUMAN	76029	RSLG	SVQAPSYGARPVSSAASVYAGAGGSGSR	18	Keratin, type I cytoskeletal 18
P05787	K2C8_HUMAN	369352	SSRS	YTSGPGSR	25	Keratin, type II cytoskeletal 8
Q14847	LASP1_HUMAN	711725	QSFT	MVADTPENLR	64	LIM and SH3 domain protein 1
Q71RC2	LARP4_HUMAN	471950	-ML	LFVEQVASK	3	La-related protein 4
P11047	LAMC1_HUMAN	24656	EACS	SCHCSPVGSLSTQCDSYGR	397	Laminin subunit gamma-1
A4D1F6	LRRD1_HUMAN	4640000	DKIT	ALNLFTR	850	Leucine-rich repeat and death domain-containing protein 1
P42704	LPPRC_HUMAN	620162	ARLY	AIAAKEKDIQEESTFSSR	60	Leucine-rich PPR motif-containing protein, mitochondrial
P80297	MT1X_HUMAN	253176	GCAK	CAQGCICKGTSDKCSCCA	44	Metallothionein-1X
P80297	MT1X_HUMAN	73000	CKKS	CCSCCPVGCAK	33	Metallothionein-1X
P80297	MT1X_HUMAN	975059	SCKK	SCCSCCPVGCAK	32	Metallothionein-1X
P02795	MT2_HUMAN	109045	GCAK	CAQGCICKGASDKCSCCA	44	Metallothionein-2
P02795	MT2_HUMAN	73000	CKKS	CCSCCPVGCAK	33	Metallothionein-2
P02795	MT2_HUMAN	975059	SCKK	SCCSCCPVGCAK	32	Metallothionein-2
Q96GW9	SYMM_HUMAN	100	PRYY	SSGSLSAGDDACDVR	30	Methionine--tRNA ligase, mitochondrial
Q9NQG6	MID51_HUMAN	84053	SGKR	SWEEPNWMGSPR	70	Mitochondrial dynamics protein MID51
O75439	MPPB_HUMAN	264873	NRLR	STQAATQVVLNVPETR	44	Mitochondrial-processing peptidase subunit beta
O43318	M3K7_HUMAN	128748	PRRR	SIQDLTVTGTEPGQVSSR	439	Mitogen-activated protein kinase kinase kinase 7
Q9Y3D0	MIP18_HUMAN	99061	-	MVGGGGVGGGLLENANPLIYQR	1	Mitotic spindle-associated MMXD complex subunit MIP18
Q6UB35	C1TM_HUMAN	132532	PCRA	SSGGGGGGGGGREGLLGQR	32	Monofunctional C1-tetrahydrofolate synthase, mitochondrial
Q9UNW1	MINP1_HUMAN	513134	LARC	SLLEPRDPVASSLSPYFGTK	31	Multiple inositol polyphosphate phosphatase 1
Q7Z406	MYH14_HUMAN	158677	QADF	SVLHYAGK	595	Myosin-14
Q9UKX2	MYH2_HUMAN	168336	-M	SSDSELAVFGEAAPFLRKSER	2	Myosin-2
Q86WG5	MTMRD_HUMAN	33580	LSSP	TPFIIGVHSVFK	270	Myotubularin-related protein 13
Q86WG5	MTMRD_HUMAN	479460	EAKV	SGLIQPAEVFAPK	107	Myotubularin-related protein 13
O75251	NDUS7_HUMAN	116020	QARG	VHQSVATDGPSSTQPALPK	30	NADH dehydrogenase [ubiquinone] iron-sulfur protein 7, mitochondrial
P19404	NDUV2_HUMAN	370148	VMQN	GAGGALFVHR	33	NADH dehydrogenase [ubiquinone] flavoprotein 2, mitochondrial
P18615	NELFE_HUMAN	206911	-	MLVIPPGLSEEEEALQKK	1	Negative elongation factor E
P18615	NELFE_HUMAN	81307	GVKR	SLSEQPVMDTATATEQAK	49	Negative elongation factor E
Q04721	NOTC2_HUMAN	38800	MTRR	SLPGEQEQEVAGSK	1609	Neurogenic locus notch homolog protein 2
P49321	NASP_HUMAN	223094	SSSN	CVTDISHLVR	708	Nuclear autoantigenic sperm protein
Q9H1E3	NUCKS_HUMAN	69429	PRLK	ATVTPSPVK	176	Nuclear ubiquitous casein and cyclin-dependent kinase substrate 1
P19338	NUCL_HUMAN	57477	PGKK	GAAIPAKGAK	126	Nucleolin
P06748	NPM_HUMAN	109251	PVKK	SIRDTPAKNAQK	195	Nucleophosmin
P06748	NPM_HUMAN	436276	SGKR	SAPGGGSKVPQKK	143	Nucleophosmin
O00746	NDKM_HUMAN	90651	LVRH	GSGGPSWTR	29	Nucleoside diphosphate kinase, mitochondrial
Q8WV74	NUDT8_HUMAN	70653	-	MLPDCLSAEGELR	1	Nucleoside diphosphate-linked moiety X motif 8
P62942	FKB1A_HUMAN	49300	-M	GVQVETISPGDGR	2	Peptidyl-prolyl cis-trans isomerase FKBP1A
P42336	PK3CA_HUMAN	3520000	IYDA	AIDLFTR	893	Phosphatidylinositol 4,5-bisphosphate 3-kinase catalytic subunit alpha isoform
Q9BRB3	PIGQ_HUMAN	869578	SEGV	EASILAELARR	197	Phosphatidylinositol N-acetylglucosaminyltransferase subunit Q
Q9UG56	PISD_HUMAN	121657	MKEA	AVEDLHHYR	155	Phosphatidylserine decarboxylase proenzyme, mitochondrial
P02545	LMNA_HUMAN	78912	RSYR	SVGGSGGGSFGDNLVTR	628	Prelamin-A/C
P17844	DDX5_HUMAN	698254	AGKR	GGFNTFR	503	Probable ATP-dependent RNA helicase DDX5
Q9NQH7	XPP3_HUMAN	1270000	QRRY	SLQPVPER	32	Probable Xaa-Pro aminopeptidase 3
Q8NBJ5	GT251_HUMAN	1400000	GADA	YFPEER	37	Procollagen galactosyltransferase 1
P07602	SAP_HUMAN	104692	QPKD	GGFCEVCK	406	Prosaposin
P07602	SAP_HUMAN	341476	PTVK	SLPCDICK	60	Prosaposin
P28074	PSB5_HUMAN	983064	MLHG	TTTLAFK	60	Proteasome subunit beta type-5
P30101	PDIA3_HUMAN	102058	LAAA	SDVLELTDDNFESR	25	Protein disulfide-isomerase A3
Q15084	PDIA6_HUMAN	697179	AVNG	LYSSSDDVIELTPSNFNR	20	Protein disulfide-isomerase A6
Q8NHV4	NEDD1_HUMAN	291242	VNKR	SVNVNAASGGVQNSGIVR	325	Protein NEDD1
Q99497	PARK7_HUMAN	1820000	ASKR	ALVILAK	6	Protein DJ-1
Q9BPW8	NIPS1_HUMAN	542445	ARFY	SKDNEGSWFR	36	Protein NipSnap homolog 1
Q9H098	F107B_HUMAN	69215	NQKR	GLAPQNKPELQK	44	Protein FAM107B
Q9UFN0	NPS3A_HUMAN	393553	CSSF	ATGPRQYDGIFYEFR	26	Protein NipSnap homolog 3A
Q96PZ0	PUS7_HUMAN	154501	SLKR	GALVVEDNDSGVPVEETKK	14	Pseudouridylate synthase 7 homolog
Q5T440	CAF17_HUMAN	186036	RCRL	AHSSCSPGGDPTAGAAWACFR	32	Putative transferase CAF17, mitochondrial
P08559	ODPA_HUMAN	849967	ASRN	FANDATFEIKK	30	Pyruvate dehydrogenase E1 component subunit alpha, somatic form, mitochondrial
Q9BWH6	RPAP1_HUMAN	242712	SGKR	SIFAQEIAAR	150	RNA polymerase II-associated protein 1
Q01844	EWS_HUMAN	153814	GGRR	GGPGGPPGPLMEQMGGR	616	RNA-binding protein EWS
Q14257	RCN2_HUMAN	1060000	AAGA	GKAEELHYPLGER	23	Reticulocalbin-2
Q9UBE0	SAE1_HUMAN	226619	-	MVEKEEAGGGISEEEAAQYDR	1	SUMO-activating enzyme subunit 1
Q9UBE0	SAE1_HUMAN	72616	-M	VEKEEAGGGISEEEAAQYDR	2	SUMO-activating enzyme subunit 1
Q9H4L4	SENP3_HUMAN	172738	KSGG	GFGPDPGSGTTVPAR	47	Sentrin-specific protease 3
Q9UHD8	SEPT9_HUMAN	73081	ALKR	SFEVEEVETPNSTPPRR	30	Septin-9
O43464	HTRA2_HUMAN	818910	AVLA	AVPSPPPASPR	134	Serine protease HTRA2, mitochondrial
Q5H9R7	PP6R3_HUMAN	77127	AEAK	CAAPRPPSSSPEQR	844	Serine/threonine-protein phosphatase 6 regulatory subunit 3
O00193	SMAP_HUMAN	208685	GVKR	SASPDDDLGSSNWEAADLGNEER	15	Small acidic protein
P21912	SDHB_HUMAN	201785	ASRG	AQTAAATAPR	29	Succinate dehydrogenase [ubiquinone] iron-sulfur subunit, mitochondrial
O95721	SNP29_HUMAN	128559	RTEK	MVDKMDQDLK	94	Synaptosomal-associated protein 29
Q8NBS9	TXND5_HUMAN	88262	EAAA	AAADGPPAADGEDGQDPHSK	44	Thioredoxin domain-containing protein 5
O43396	TXNL1_HUMAN	1770000	-	MVGVKPVGSDPDFQPELSGAGSR	1	Thioredoxin-like protein 1
P10827	THA_HUMAN	1570000	SLRA	AVRYDPESDTLTLSGEMAVKR	264	Thyroid hormone receptor alpha
P10827	THA_HUMAN	330477	LRAA	VRYDPESDTLTLSGEMAVKR	265	Thyroid hormone receptor alpha
P20290	BTF3_HUMAN	984811	QEPQ	MKETIMNQEK	45	Transcription factor BTF3
Q9UPQ9	TNR6B_HUMAN	45243	SGRR	SYRPTHPDCQAVLQTLLSR	592	Trinucleotide repeat-containing gene 6B protein
P68363	TBA1B_HUMAN	452134	ITNA	CFEPANQMVK	295	Tubulin alpha-1B chain
P68363	TBA1B_HUMAN	464403	KTKR	SIQFVDWCPTGFK	340	Tubulin alpha-1B chain
P68363	TBA1B_HUMAN	49570	VCML	SNTTAIAEAWAR	379	Tubulin alpha-1B chain
Q96DI7	SNR40_HUMAN	100654	-	MIEQQKR	1	U5 small nuclear ribonucleoprotein 40 kDa protein
P62987	RL40_HUMAN	261970	LRGG	IIEPSLR	77	Ubiquitin-60S ribosomal protein L40
Q9BZL1	UBL5_HUMAN	769016	-	MIEVVCNDR	1	Ubiquitin-like protein 5
Q9P206	K1522_HUMAN	171761	NPAN	SWVPGLSPGGSR	498	Uncharacterized protein KIAA1522
Q96H20	SNF8_HUMAN	504044	MHRR	GVGAGAIAK	5	Vacuolar-sorting protein SNF8
Q5ST30	SYVM_HUMAN	705505	PRFH	SVSTQSEPHGSPISR	27	Valine--tRNA ligase, mitochondrial
P08670	VIME_HUMAN	1280000	STRT	YSLGSALRPSTSR	38	Vimentin
P08670	VIME_HUMAN	136162	SLYA	SSPGGVYATR	55	Vimentin
P08670	VIME_HUMAN	189084	STSR	SLYASSPGGVYATR	51	Vimentin
P08670	VIME_HUMAN	233525	VRLR	SSVPGVR	72	Vimentin
P08670	VIME_HUMAN	3460000	SSRS	YVTTSTR	30	Vimentin
P08670	VIME_HUMAN	345662	RSLY	ASSPGGVYATR	54	Vimentin
P08670	VIME_HUMAN	598770	SLAD	AINTEFKNTR	91	Vimentin
P08670	VIME_HUMAN	677339	TSRS	LYASSPGGVYATR	52	Vimentin
P08670	VIME_HUMAN	77743	SRSL	YASSPGGVYATR	53	Vimentin
P08670	VIME_HUMAN	823945	TRTY	SLGSALRPSTSR	39	Vimentin
Q13303	KCAB2_HUMAN	61135	-	MYPESTTGSPAR	1	Voltage-gated potassium channel subunit beta-2

## Sheet: ZVP-substrates-abu.txt
Uniprot	Protein name
P61981	14-3-3 protein gamma
P51398	28S ribosomal protein S29, mitochondrial
Q6NVY1	3-hydroxyisobutyryl-CoA hydrolase, mitochondrial
Q13405	39S ribosomal protein L49, mitochondrial
Q9BYD3	39S ribosomal protein L4, mitochondrial
Q9H0U6	39S ribosomal protein L18, mitochondrial
Q9H2W6	39S ribosomal protein L46, mitochondrial
P60866	40S ribosomal protein S20
P62081	40S ribosomal protein S7
P62273	40S ribosomal protein S29
P10809	60 kDa heat shock protein, mitochondrial
P46777	60S ribosomal protein L5
O76080	AN1-type zinc finger protein 5
P06576	ATP synthase subunit beta, mitochondrial
O76031	ATP-dependent Clp protease ATP-binding subunit clpX-like, mitochondrial
Q08211	ATP-dependent RNA helicase A
Q86XP3	ATP-dependent RNA helicase DDX42
Q9UII2	ATPase inhibitor, mitochondrial
Q9BWD1	Acetyl-CoA acetyltransferase, cytosolic
P60709	Actin, cytoplasmic 1
P63261	Actin, cytoplasmic 2
P68133	Actin, alpha skeletal muscle
P54819	Adenylate kinase 2, mitochondrial
P30520	Adenylosuccinate synthetase isozyme 2
P55196	Afadin
Q5JTZ9	Alanine--tRNA ligase, mitochondrial
Q8NI60	Atypical kinase COQ8A, mitochondrial
Q676U5	Autophagy-related protein 16-1
Q562R1	Beta-actin-like protein 2
O60271	C-Jun-amino-terminal kinase-interacting protein 4
Q9NX58	Cell growth-regulating nucleolar protein
P45973	Chromobox protein homolog 5
Q13185	Chromobox protein homolog 3
P38432	Coilin
O75131	Copine-3
O75367	Core histone macro-H2A.1
O00483	Cytochrome c oxidase subunit NDUFA4
P09669	Cytochrome c oxidase subunit 6C
P10606	Cytochrome c oxidase subunit 5B, mitochondrial
P20674	Cytochrome c oxidase subunit 5A, mitochondrial
Q9Y6G9	Cytoplasmic dynein 1 light intermediate chain 1
P09884	DNA polymerase alpha catalytic subunit
P27695	DNA-(apurinic or apyrimidinic site) lyase
P24928	DNA-directed RNA polymerase II subunit RPB1
Q5SXM8	DNL-type zinc finger protein
P33316	Deoxyuridine 5'-triphosphate nucleotidohydrolase, mitochondrial
Q9NR28	Diablo homolog, mitochondrial
Q06587	E3 ubiquitin-protein ligase RING1
P13639	Elongation factor 2
P30084	Enoyl-CoA hydratase, mitochondrial
Q04637	Eukaryotic translation initiation factor 4 gamma 1
P00367	Glutamate dehydrogenase 1, mitochondrial
P30419	Glycylpeptide N-tetradecanoyltransferase 1
O75487	Glypican-4
P07900	Heat shock protein HSP 90-alpha
P08238	Heat shock protein HSP 90-beta
P31943	Heterogeneous nuclear ribonucleoprotein H
P52597	Heterogeneous nuclear ribonucleoprotein F
Q00839	Heterogeneous nuclear ribonucleoprotein U
Q9BX68	Histidine triad nucleotide-binding protein 2, mitochondrial
Q92522	Histone H1x
O00410	Importin-5
Q07820	Induced myeloid leukemia cell differentiation protein Mcl-1
O14654	Insulin receptor substrate 4
P51553	Isocitrate dehydrogenase [NAD] subunit gamma, mitochondrial
Q9UK76	Jupiter microtubule associated homolog 1
Q7Z4H8	KDEL motif-containing protein 2
P05783	Keratin, type I cytoskeletal 18
P05787	Keratin, type II cytoskeletal 8
Q14847	LIM and SH3 domain protein 1
Q71RC2	La-related protein 4
P11047	Laminin subunit gamma-1
A4D1F6	Leucine-rich repeat and death domain-containing protein 1
P42704	Leucine-rich PPR motif-containing protein, mitochondrial
P80297	Metallothionein-1X
P02795	Metallothionein-2
Q96GW9	Methionine--tRNA ligase, mitochondrial
Q9NQG6	Mitochondrial dynamics protein MID51
O75439	Mitochondrial-processing peptidase subunit beta
O43318	Mitogen-activated protein kinase kinase kinase 7
Q9Y3D0	Mitotic spindle-associated MMXD complex subunit MIP18
Q6UB35	Monofunctional C1-tetrahydrofolate synthase, mitochondrial
Q9UNW1	Multiple inositol polyphosphate phosphatase 1
Q7Z406	Myosin-14
Q9UKX2	Myosin-2
Q86WG5	Myotubularin-related protein 13
O75251	NADH dehydrogenase [ubiquinone] iron-sulfur protein 7, mitochondrial
P19404	NADH dehydrogenase [ubiquinone] flavoprotein 2, mitochondrial
P18615	Negative elongation factor E
Q04721	Neurogenic locus notch homolog protein 2
P49321	Nuclear autoantigenic sperm protein
Q9H1E3	Nuclear ubiquitous casein and cyclin-dependent kinase substrate 1
P19338	Nucleolin
P06748	Nucleophosmin
O00746	Nucleoside diphosphate kinase, mitochondrial
Q8WV74	Nucleoside diphosphate-linked moiety X motif 8
P62942	Peptidyl-prolyl cis-trans isomerase FKBP1A
Q02790	Peptidyl-prolyl cis-trans isomerase FKBP4
P42336	Phosphatidylinositol 4,5-bisphosphate 3-kinase catalytic subunit alpha isoform
Q9BRB3	Phosphatidylinositol N-acetylglucosaminyltransferase subunit Q
Q9UG56	Phosphatidylserine decarboxylase proenzyme, mitochondrial
P02545	Prelamin-A/C
P17844	Probable ATP-dependent RNA helicase DDX5
Q9NQH7	Probable Xaa-Pro aminopeptidase 3
Q8NBJ5	Procollagen galactosyltransferase 1
P07602	Prosaposin
P28074	Proteasome subunit beta type-5
P30101	Protein disulfide-isomerase A3
Q15084	Protein disulfide-isomerase A6
Q8NHV4	Protein NEDD1
Q99497	Protein DJ-1
Q9BPW8	Protein NipSnap homolog 1
Q9H098	Protein FAM107B
Q9UFN0	Protein NipSnap homolog 3A
Q96PZ0	Pseudouridylate synthase 7 homolog
Q5T440	Putative transferase CAF17, mitochondrial
P08559	Pyruvate dehydrogenase E1 component subunit alpha, somatic form, mitochondrial
Q9BWH6	RNA polymerase II-associated protein 1
Q01844	RNA-binding protein EWS
Q14257	Reticulocalbin-2
Q9UBE0	SUMO-activating enzyme subunit 1
Q9H4L4	Sentrin-specific protease 3
Q9UHD8	Septin-9
O43464	Serine protease HTRA2, mitochondrial
Q5H9R7	Serine/threonine-protein phosphatase 6 regulatory subunit 3
O00193	Small acidic protein
P21912	Succinate dehydrogenase [ubiquinone] iron-sulfur subunit, mitochondrial
O95721	Synaptosomal-associated protein 29
Q8NBS9	Thioredoxin domain-containing protein 5
O43396	Thioredoxin-like protein 1
P10827	Thyroid hormone receptor alpha
P20290	Transcription factor BTF3
Q9UPQ9	Trinucleotide repeat-containing gene 6B protein
P68363	Tubulin alpha-1B chain
Q13748	Tubulin alpha-3C/D chain
Q6PEY2	Tubulin alpha-3E chain
Q71U36	Tubulin alpha-1A chain
Q9BQE3	Tubulin alpha-1C chain
Q9NY65	Tubulin alpha-8 chain
Q96DI7	U5 small nuclear ribonucleoprotein 40 kDa protein
P62987	Ubiquitin-60S ribosomal protein L40
Q9BZL1	Ubiquitin-like protein 5
Q9P206	Uncharacterized protein KIAA1522
Q96H20	Vacuolar-sorting protein SNF8
Q5ST30	Valine--tRNA ligase, mitochondrial
P08670	Vimentin
Q13303	Voltage-gated potassium channel subunit beta-2

## Sheet: Control-heavy-report.txt
Search Name:	Q20170801-07-Zika-2017/heavy
Search Name:	Q20170801-07-Zika-2017/heavy
Search Name:	Q20170801-09-Zika-2017/heavy
			Q20170801-07-Zika-2017/heavy
	Uniq Pep	Acc #	UniProt ID	Num Unique	% Cov	Best Disc Score	Best Expect Val	m/z	z	Intensity	ppm	Prev AA	DB Peptide	Constant Mods	Variable Mods	Fraction	RT	Start	Expect	# in DB	Protein Length	Protein MW	Species	Protein Name
[1]		P60709	ACTB_HUMAN	31	38.1	11.55	8.8e-21	634.058	4	1540000	-0.76	GRPR	HQGVMVGMGQKDSYVGDEAQSKR	Label:13C(6)15N(2)@11;Label:13C(6)15N(2)@22;Label:13C(6)15N(4)@23		Q20170801-07	100.659	40	8.8e-21	6	375	41737.1	HUMAN	Actin, cytoplasmic 1
[1]		P60709	ACTB_HUMAN	31	38.1	11.55	8.8e-21	789.707	3	144455	1.2	GRPR	HQGVMVGMGQKDSYVGDEAQSK	Label:13C(6)15N(2)@11;Label:13C(6)15N(2)@22		Q20170801-07	108.24	40	1e-17	6	375	41737.1	HUMAN	Actin, cytoplasmic 1
[1]		P60709	ACTB_HUMAN	31	38.1	11.55	8.8e-21	638.058	4	174112	0.17	GRPR	HQGVMVGMGQKDSYVGDEAQSKR	Label:13C(6)15N(2)@11;Label:13C(6)15N(2)@22;Label:13C(6)15N(4)@23	Oxidation@5'32	Q20170801-07	88.24	40	6.6e-17	6	375	41737.1	HUMAN	Actin, cytoplasmic 1
[1]		P60709	ACTB_HUMAN	31	38.1	11.55	8.8e-21	549.269	3	230024	-0.025	WISK	QEYDESGPSIVHRK	Label:13C(6)15N(2)@14;Label:13C(6)15N(4)@13	Gln->pyro-Glu@1	Q20170801-09	91.9836	360	2.7e-13	7	375	41737.1	HUMAN	Actin, cytoplasmic 1
[1]		P60709	ACTB_HUMAN	31	38.1	11.55	8.8e-21	782.924	2	440832	-0.22	IADR	MQKEITALAPSTMK	Label:13C(6)15N(2)@3;Label:13C(6)15N(2)@14		Q20170801-09	120.587	313	1.3e-12	6	375	41737.1	HUMAN	Actin, cytoplasmic 1
[1]		P60709	ACTB_HUMAN	31	38.1	11.55	8.8e-21	554.945	3	406763	-0.15	WISK	QEYDESGPSIVHRK	Label:13C(6)15N(2)@14;Label:13C(6)15N(4)@13		Q20170801-09	66.562	360	4.3e-12	7	375	41737.1	HUMAN	Actin, cytoplasmic 1
[1]		P60709	ACTB_HUMAN	31	38.1	11.55	8.8e-21	553.594	3	316229	0.16	VMVG	MGQKDSYVGDEAQSK	Label:13C(6)15N(2)@4;Label:13C(6)15N(2)@15		Q20170801-09	49.0578	47	1.6e-11	6	375	41737.1	HUMAN	Actin, cytoplasmic 1
[1]		P60709	ACTB_HUMAN	31	38.1	11.55	8.8e-21	900.953	2	1260000	-0.97	SLEK	SYELPDGQVITIGNER	Label:13C(6)15N(4)@16		Q20170801-07	179.945	239	2e-11	10	375	41737.1	HUMAN	Actin, cytoplasmic 1
[1]		P60709	ACTB_HUMAN	31	38.1	11.55	8.8e-21	509.257	3	800474	-1.7	DMEK	IWHHTFYNELR	Label:13C(6)15N(4)@11		Q20170801-09	128.886	85	1.2e-10	9	375	41737.1	HUMAN	Actin, cytoplasmic 1
[1]		P60709	ACTB_HUMAN	31	38.1	11.55	8.8e-21	456.974	4	412550	-0.95	VMVG	MGQKDSYVGDEAQSKR	Label:13C(6)15N(2)@4;Label:13C(6)15N(2)@15;Label:13C(6)15N(4)@16		Q20170801-09	44.5405	47	1.4e-10	6	375	41737.1	HUMAN	Actin, cytoplasmic 1
[1]		P60709	ACTB_HUMAN	31	38.1	11.55	8.8e-21	393.866	3	248233	-0.5	GRPR	HQGVMVGMGQK	Label:13C(6)15N(2)@11		Q20170801-07	63.6884	40	1.6e-10	7	375	41737.1	HUMAN	Actin, cytoplasmic 1
[1]		P60709	ACTB_HUMAN	31	38.1	11.55	8.8e-21	824.919	2	493676	3.7	LYAN	TVLSGGTTMYPGIADR	Label:13C(6)15N(4)@16		Q20170801-09	155.966	297	1.7e-09	2	375	41737.1	HUMAN	Actin, cytoplasmic 1
[1]		P60709	ACTB_HUMAN	31	38.1	11.55	8.8e-21	755.347	2	102555	1.1	WISK	QEYDESGPSIVHR	Label:13C(6)15N(4)@13	Gln->pyro-Glu@1	Q20170801-09	115.904	360	1.9e-09	7	375	41737.1	HUMAN	Actin, cytoplasmic 1
[1]		P60709	ACTB_HUMAN	31	38.1	11.55	8.8e-21	399.198	3	589225	-1.4	GRPR	HQGVMVGMGQK	Label:13C(6)15N(2)@11	Oxidation@8'57	Q20170801-09	28.5542	40	8.8e-09	7	375	41737.1	HUMAN	Actin, cytoplasmic 1
[1]		P60709	ACTB_HUMAN	31	38.1	11.55	8.8e-21	763.859	2	100	-0.043	WISK	QEYDESGPSIVHR	Label:13C(6)15N(4)@13		Q20170801-09	85.8639	360	9.3e-09	7	375	41737.1	HUMAN	Actin, cytoplasmic 1
[1]		P60709	ACTB_HUMAN	31	38.1	11.55	8.8e-21	795.037	3	57994	-0.85	GRPR	HQGVMVGMGQKDSYVGDEAQSK	Label:13C(6)15N(2)@11;Label:13C(6)15N(2)@22	Oxidation@5'6	Q20170801-09	92.7429	40	2.5e-08	6	375	41737.1	HUMAN	Actin, cytoplasmic 1
[1]		P60709	ACTB_HUMAN	31	38.1	11.55	8.8e-21	638.057	4	73709	-0.93	GRPR	HQGVMVGMGQKDSYVGDEAQSKR	Label:13C(6)15N(2)@11;Label:13C(6)15N(2)@22;Label:13C(6)15N(4)@23	Oxidation@8'14	Q20170801-09	77.0758	40	4.2e-08	6	375	41737.1	HUMAN	Actin, cytoplasmic 1
[1]		P60709	ACTB_HUMAN	31	38.1	11.55	8.8e-21	598.293	2	223599	-1.4	GRPR	HQGVMVGMGQK	Label:13C(6)15N(2)@11	Oxidation@5'29	Q20170801-09	42.5993	40	8.6e-08	7	375	41737.1	HUMAN	Actin, cytoplasmic 1
[1]		P60709	ACTB_HUMAN	31	38.1	11.55	8.8e-21	493.732	2	455626	0.86	GMCK	AGFAGDDAPR	Label:13C(6)15N(4)@10		Q20170801-09	56.9982	19	1.1e-07	10	375	41737.1	HUMAN	Actin, cytoplasmic 1
[1]		P60709	ACTB_HUMAN	31	38.1	11.55	8.8e-21	406.912	3	1580000	-0.25	DAPR	AVFPSIVGRPR	Label:13C(6)15N(4)@9;Label:13C(6)15N(4)@11		Q20170801-09	132.417	29	1.6e-07	10	375	41737.1	HUMAN	Actin, cytoplasmic 1
[1]		P60709	ACTB_HUMAN	31	38.1	11.55	8.8e-21	668.316	2	194532	0.57	NTVL	SGGTTMYPGIADR	Label:13C(6)15N(4)@13		Q20170801-09	110.126	300	3.1e-07	6	375	41737.1	HUMAN	Actin, cytoplasmic 1
[1]		P60709	ACTB_HUMAN	31	38.1	11.55	8.8e-21	454.264	4	598378	-0.043	IADR	MQKEITALAPSTMKIK	Label:13C(6)15N(2)@3;Label:13C(6)15N(2)@14;Label:13C(6)15N(2)@16		Q20170801-09	133.709	313	5.3e-07	6	375	41737.1	HUMAN	Actin, cytoplasmic 1
[1]		P60709	ACTB_HUMAN	31	38.1	11.55	8.8e-21	654.695	3	394552	-4.4	NELR	VAPEEHPVLLTEAPLNPK	Label:13C(6)15N(2)@18		Q20170801-09	155.187	96	1.1e-06	2	375	41737.1	HUMAN	Actin, cytoplasmic 1
[1]		P60709	ACTB_HUMAN	31	38.1	11.55	8.8e-21	596.53	4	152838	-0.25	GRPR	HQGVMVGMGQKDSYVGDEAQSK	Label:13C(6)15N(2)@11;Label:13C(6)15N(2)@22	Oxidation@8'14	Q20170801-07	86.3728	40	2.6e-06	6	375	41737.1	HUMAN	Actin, cytoplasmic 1
[1]		P60709	ACTB_HUMAN	31	38.1	11.55	8.8e-21	585.32	2	617272	0.36	RMQK	EITALAPSTMK	Label:13C(6)15N(2)@11		Q20170801-09	121.145	316	3.2e-06	6	375	41737.1	HUMAN	Actin, cytoplasmic 1
[1]		P60709	ACTB_HUMAN	31	38.1	11.55	8.8e-21	397.599	3	1430000	0.41	STMK	IKIIAPPERK	Label:13C(6)15N(2)@2;Label:13C(6)15N(2)@10;Label:13C(6)15N(4)@9		Q20170801-09	77.4942	327	7.1e-06	7	375	41737.1	HUMAN	Actin, cytoplasmic 1
[1]		P60709	ACTB_HUMAN	31	38.1	11.55	8.8e-21	500.741	2	77908	2.4	MCKA	GFAGDDAPR	Label:13C(6)15N(4)@9	Abu@N-term	Q20170801-07	67.6012	20	2.1e-05	10	375	41737.1	HUMAN	Actin, cytoplasmic 1
[1]		P60709	ACTB_HUMAN	31	38.1	11.55	8.8e-21	471.298	2	101549	-0.26	MKIK	IIAPPERK	Label:13C(6)15N(2)@8;Label:13C(6)15N(4)@7		Q20170801-09	42.622	329	5.4e-05	7	375	41737.1	HUMAN	Actin, cytoplasmic 1
[1]		P60709	ACTB_HUMAN	31	38.1	11.55	8.8e-21	473.614	3	680607	0.52	RMQK	EITALAPSTMKIK	Label:13C(6)15N(2)@11;Label:13C(6)15N(2)@13		Q20170801-09	137.356	316	0.00044	6	375	41737.1	HUMAN	Actin, cytoplasmic 1
[1]		P60709	ACTB_HUMAN	31	38.1	11.55	8.8e-21	527.617	3	251617	0.55	IADR	MQKEITALAPSTMK	Label:13C(6)15N(2)@3;Label:13C(6)15N(2)@14	Oxidation@13'68	Q20170801-09	98.9422	313	0.00074	6	375	41737.1	HUMAN	Actin, cytoplasmic 1
[1]		P60709	ACTB_HUMAN	31	38.1	11.55	8.8e-21	352.229	3	1200000	-0.011	STMK	IKIIAPPER	Label:13C(6)15N(2)@2;Label:13C(6)15N(4)@9		Q20170801-09	98.6164	327	0.0028	7	375	41737.1	HUMAN	Actin, cytoplasmic 1
[2]		P35579	MYH9_HUMAN	12	5.9	8.05	2.7e-14	687.673	3	349340	0.99	ILKK	TLEEEAKTHEAQIQEMR	Label:13C(6)15N(2)@7;Label:13C(6)15N(4)@17		Q20170801-09	128.908	1175	2.7e-14	1	1960	226534	HUMAN	Myosin-9
[2]		P35579	MYH9_HUMAN	12	5.9	8.05	2.7e-14	750.379	3	581321	-2.2	EEMK	TQLEELEDELQATEDAKLR	Label:13C(6)15N(2)@17;Label:13C(6)15N(4)@19		Q20170801-09	189.27	1539	4.1e-13	3	1960	226534	HUMAN	Myosin-9
[2]		P35579	MYH9_HUMAN	12	5.9	8.05	2.7e-14	1029.99	2	41141	-0.71	KKLK	SMEAEMIQLQEELAAAER	Label:13C(6)15N(4)@18		Q20170801-09	203.68	1677	8.1e-11	1	1960	226534	HUMAN	Myosin-9
[2]		P35579	MYH9_HUMAN	12	5.9	8.05	2.7e-14	697.404	2	208169	-0.62	GMFR	TVGQLYKEQLAK	Label:13C(6)15N(2)@7;Label:13C(6)15N(2)@12		Q20170801-09	98.3814	645	1.5e-09	1	1960	226534	HUMAN	Myosin-9
[2]		P35579	MYH9_HUMAN	12	5.9	8.05	2.7e-14	567.594	3	404434	-0.081	KQFR	TEMEDLMSSKDDVGK	Label:13C(6)15N(2)@10;Label:13C(6)15N(2)@15		Q20170801-09	124.466	1504	1.6e-09	1	1960	226534	HUMAN	Myosin-9
[2]		P35579	MYH9_HUMAN	12	5.9	8.05	2.7e-14	589.762	2	201424	0.53	KQFR	TEMEDLMSSK	Label:13C(6)15N(2)@10		Q20170801-09	116.452	1504	2e-09	1	1960	226534	HUMAN	Myosin-9
[2]		P35579	MYH9_HUMAN	12	5.9	8.05	2.7e-14	626.802	2	39982	-0.23	EEAK	THEAQIQEMR	Label:13C(6)15N(4)@10		Q20170801-09	49.6375	1182	6.5e-09	1	1960	226534	HUMAN	Myosin-9
[2]		P35579	MYH9_HUMAN	12	5.9	8.05	2.7e-14	642.314	3	56400	1.9	GKKR	HEMPPHIYAITDTAYR	Label:13C(6)15N(4)@16		Q20170801-09	140.479	144	2.9e-08	1	1960	226534	HUMAN	Myosin-9
[2]		P35579	MYH9_HUMAN	12	5.9	8.05	2.7e-14	657.315	3	244095	-0.88	EEMK	TQLEELEDELQATEDAK	Label:13C(6)15N(2)@17		Q20170801-09	188.504	1539	4.8e-07	3	1960	226534	HUMAN	Myosin-9
[2]		P35579	MYH9_HUMAN	12	5.9	8.05	2.7e-14	510.798	2	337792	-1.3	ERVR	TELADKVTK	Label:13C(6)15N(2)@6;Label:13C(6)15N(2)@9		Q20170801-09	38.1223	1269	2.6e-05	1	1960	226534	HUMAN	Myosin-9
[2]		P35579	MYH9_HUMAN	12	5.9	8.05	2.7e-14	351.536	3	70823	-0.75	HEEK	VAAYDKLEK	Label:13C(6)15N(2)@6;Label:13C(6)15N(2)@9		Q20170801-09	55.9802	1405	0.0084	1	1960	226534	HUMAN	Myosin-9
[2]		P35579	MYH9_HUMAN	12	5.9	8.05	2.7e-14	408.739	2	100749	0.81	GMFR	TVGQLYK	Label:13C(6)15N(2)@7		Q20170801-09	57.2776	645	0.017	4	1960	226534	HUMAN	Myosin-9
[2-1]	6	P35580	MYH10_HUMAN	9	5	7.41	4.1e-13	750.379	3	581321	-2.2	EEMR	TQLEELEDELQATEDAKLR	Label:13C(6)15N(2)@17;Label:13C(6)15N(4)@19		Q20170801-09	189.27	1546	4.1e-13	3	1976	229001	HUMAN	Myosin-10
[2-1]	6	P35580	MYH10_HUMAN	9	5	7.41	4.1e-13	877.961	2	366650	-0.92	RFRK	TTLQVDTLNAELAAER	Label:13C(6)15N(4)@16		Q20170801-09	170.151	1762	1.1e-11	1	1976	229001	HUMAN	Myosin-10
[2-1]	6	P35580	MYH10_HUMAN	9	5	7.41	4.1e-13	464.572	3	408846	-1.1	PSER	HGFEAASIKEER	Label:13C(6)15N(2)@9;Label:13C(6)15N(4)@12		Q20170801-09	64.3632	43	2.2e-09	1	1976	229001	HUMAN	Myosin-10
[2-1]	6	P35580	MYH10_HUMAN	9	5	7.41	4.1e-13	461.6	3	262365	0.18	GMFR	TVGQLYKESLTK	Label:13C(6)15N(2)@7;Label:13C(6)15N(2)@12		Q20170801-07	106.516	652	3.6e-08	1	1976	229001	HUMAN	Myosin-10
[2-1]	6	P35580	MYH10_HUMAN	9	5	7.41	4.1e-13	577.294	3	412549	1.3	MAQR	TGLEDPERYLFVDR	Label:13C(6)15N(4)@8;Label:13C(6)15N(4)@14		Q20170801-09	177.317	5	1.6e-07	1	1976	229001	HUMAN	Myosin-10
[2-1]	6	P35580	MYH10_HUMAN	9	5	7.41	4.1e-13	657.68	3	151621	-0.46	MRQR	HATALEELSEQLEQAKR	Label:13C(6)15N(2)@16;Label:13C(6)15N(4)@17		Q20170801-09	168.651	1201	3.7e-07	1	1976	229001	HUMAN	Myosin-10
[2-1]	6	P35580	MYH10_HUMAN	9	5	7.41	4.1e-13	657.315	3	244095	-0.88	EEMR	TQLEELEDELQATEDAK	Label:13C(6)15N(2)@17		Q20170801-09	188.504	1546	4.8e-07	3	1976	229001	HUMAN	Myosin-10
[2-1]	6	P35580	MYH10_HUMAN	9	5	7.41	4.1e-13	505.289	2	336405	0.56	TAKK	LVWIPSER	Label:13C(6)15N(4)@8		Q20170801-09	150.909	35	0.0024	1	1976	229001	HUMAN	Myosin-10
[2-1]	6	P35580	MYH10_HUMAN	9	5	7.41	4.1e-13	408.739	2	100749	0.81	GMFR	TVGQLYK	Label:13C(6)15N(2)@7		Q20170801-09	57.2776	652	0.017	4	1976	229001	HUMAN	Myosin-10
[3]		P08238	HS90B_HUMAN	11	18.4	6.67	9.5e-12	687.376	2	208495	0.51	PQER	TLTLVDTGIGMTK	Label:13C(6)15N(2)@13	Oxidation@11	Q20170801-09	151.513	83	9.5e-12	5	724	83264.9	HUMAN	Heat shock protein HSP 90-beta
[3]		P08238	HS90B_HUMAN	11	18.4	6.67	9.5e-12	704.713	3	148585	0.34	VVKK	HSQFIGYPITLYLEKER	Label:13C(6)15N(2)@15;Label:13C(6)15N(4)@17		Q20170801-09	182.877	205	2.9e-11	2	724	83264.9	HUMAN	Heat shock protein HSP 90-beta
[3]		P08238	HS90B_HUMAN	11	18.4	6.67	9.5e-12	729.657	3	95787	1.6	ELLR	YHTSQSGDEMTSLSEYVSR	Label:13C(6)15N(4)@19		Q20170801-07	152.102	457	7.8e-11	1	724	83264.9	HUMAN	Heat shock protein HSP 90-beta
[3]		P08238	HS90B_HUMAN	11	18.4	6.67	9.5e-12	679.378	2	3210000	0.2	PQER	TLTLVDTGIGMTK	Label:13C(6)15N(2)@13		Q20170801-09	168.872	83	9.7e-11	5	724	83264.9	HUMAN	Heat shock protein HSP 90-beta
[3]		P08238	HS90B_HUMAN	11	18.4	6.67	9.5e-12	512.591	3	1820000	-0.22	EFYK	SLTNDWEDHLAVK	Label:13C(6)15N(2)@13		Q20170801-09	153.467	307	3e-09	2	724	83264.9	HUMAN	Heat shock protein HSP 90-beta
[3]		P08238	HS90B_HUMAN	11	18.4	6.67	9.5e-12	448.995	4	217609	1.3	MAKK	HLEINPDHPIVETLR	Label:13C(6)15N(4)@15		Q20170801-09	148.637	625	1.7e-08	1	724	83264.9	HUMAN	Heat shock protein HSP 90-beta
[3]		P08238	HS90B_HUMAN	11	18.4	6.67	9.5e-12	564.607	3	121474	2.2	MKAQ	ALRDNSTMGYMMAK	Label:13C(6)15N(2)@14;Label:13C(6)15N(4)@3	Abu@N-term	Q20170801-07	127.88	610	2.5e-08	2	724	83264.9	HUMAN	Heat shock protein HSP 90-beta
[3]		P08238	HS90B_HUMAN	11	18.4	6.67	9.5e-12	908.991	2	282636	0.85	VVKK	HSQFIGYPITLYLEK	Label:13C(6)15N(2)@15		Q20170801-09	190.731	205	3.4e-08	3	724	83264.9	HUMAN	Heat shock protein HSP 90-beta
[3]		P08238	HS90B_HUMAN	11	18.4	6.67	9.5e-12	919.45	3	59537	-2.1	ELNK	TKPIWTRNPDDITQEEYGEFYK	Label:13C(6)15N(2)@2;Label:13C(6)15N(2)@22;Label:13C(6)15N(4)@7		Q20170801-09	169.665	285	1.1e-07	1	724	83264.9	HUMAN	Heat shock protein HSP 90-beta
[3]		P08238	HS90B_HUMAN	11	18.4	6.67	9.5e-12	584.802	2	378127	-0.91	ETQK	SIYYITGESK	Label:13C(6)15N(2)@10		Q20170801-07	116.106	482	4.8e-07	2	724	83264.9	HUMAN	Heat shock protein HSP 90-beta
[3]		P08238	HS90B_HUMAN	11	18.4	6.67	9.5e-12	384.527	3	80712	-2.3	KNLK	LGIHEDSTNR	Label:13C(6)15N(4)@10		Q20170801-09	39.9663	439	3.3e-05	1	724	83264.9	HUMAN	Heat shock protein HSP 90-beta
[3-1]	7	P07900	HS90A_HUMAN	10	14.5	6.67	9.5e-12	687.376	2	208495	0.51	KQDR	TLTIVDTGIGMTK	Label:13C(6)15N(2)@13	Oxidation@11	Q20170801-09	151.513	88	9.5e-12	5	732	84660.4	HUMAN	Heat shock protein HSP 90-alpha
[3-1]	7	P07900	HS90A_HUMAN	10	14.5	6.67	9.5e-12	679.378	2	3210000	0.2	KQDR	TLTIVDTGIGMTK	Label:13C(6)15N(2)@13		Q20170801-09	168.872	88	9.7e-11	5	732	84660.4	HUMAN	Heat shock protein HSP 90-alpha
[3-1]	7	P07900	HS90A_HUMAN	10	14.5	6.67	9.5e-12	694.709	3	518109	-0.74	IVKK	HSQFIGYPITLFVEKER	Label:13C(6)15N(2)@15;Label:13C(6)15N(4)@17		Q20170801-09	186.808	210	2.1e-09	1	732	84660.4	HUMAN	Heat shock protein HSP 90-alpha
[3-1]	7	P07900	HS90A_HUMAN	10	14.5	6.67	9.5e-12	599.655	3	420693	-1	AAKK	HLEINPDHSIIETLR	Label:13C(6)15N(4)@15		Q20170801-09	160.433	633	2.2e-09	1	732	84660.4	HUMAN	Heat shock protein HSP 90-alpha
[3-1]	7	P07900	HS90A_HUMAN	10	14.5	6.67	9.5e-12	512.591	3	1820000	-0.22	EFYK	SLTNDWEDHLAVK	Label:13C(6)15N(2)@13		Q20170801-09	153.467	315	3e-09	2	732	84660.4	HUMAN	Heat shock protein HSP 90-alpha
[3-1]	7	P07900	HS90A_HUMAN	10	14.5	6.67	9.5e-12	616.824	2	337238	0.12	ENQK	HIYYITGETK	Label:13C(6)15N(2)@10		Q20170801-07	94.3229	490	1.2e-08	2	732	84660.4	HUMAN	Heat shock protein HSP 90-alpha
[3-1]	7	P07900	HS90A_HUMAN	10	14.5	6.67	9.5e-12	893.985	2	87097	0.75	IVKK	HSQFIGYPITLFVEK	Label:13C(6)15N(2)@15		Q20170801-09	194.083	210	9.1e-07	2	732	84660.4	HUMAN	Heat shock protein HSP 90-alpha
[3-1]	7	P07900	HS90A_HUMAN	10	14.5	6.67	9.5e-12	686.339	4	65745	3.6	ELNK	TKPIWTRNPDDITNEEYGEFYK	Label:13C(6)15N(2)@2;Label:13C(6)15N(2)@22;Label:13C(6)15N(4)@7		Q20170801-07	169.656	293	1.1e-06	1	732	84660.4	HUMAN	Heat shock protein HSP 90-alpha
[3-1]	7	P07900	HS90A_HUMAN	10	14.5	6.67	9.5e-12	487.217	2	212427	-0.79	FTVR	TDTGEPMGR	Label:13C(6)15N(4)@9		Q20170801-09	27.1024	174	1.3e-06	1	732	84660.4	HUMAN	Heat shock protein HSP 90-alpha
[3-1]	7	P07900	HS90A_HUMAN	10	14.5	6.67	9.5e-12	378.241	2	356251	-1.2	FEGK	TLVSVTK	Label:13C(6)15N(2)@7		Q20170801-07	60.0647	540	0.0025	3	732	84660.4	HUMAN	Heat shock protein HSP 90-alpha
[3-2]	1	Q58FG1	HS904_HUMAN	3	4.8	6.67	9.5e-12	687.376	2	208495	0.51	KQDR	TLTIVDTGIGMTK	Label:13C(6)15N(2)@13	Oxidation@11	Q20170801-09	151.513	28	9.5e-12	5	418	47712.3	HUMAN	Putative heat shock protein HSP 90-alpha A4
[3-2]	1	Q58FG1	HS904_HUMAN	3	4.8	6.67	9.5e-12	679.378	2	3210000	0.2	KQDR	TLTIVDTGIGMTK	Label:13C(6)15N(2)@13		Q20170801-09	168.872	28	9.7e-11	5	418	47712.3	HUMAN	Putative heat shock protein HSP 90-alpha A4
[3-2]	1	Q58FG1	HS904_HUMAN	3	4.8	6.67	9.5e-12	378.241	2	356251	-1.2	FEGK	TLVSVTK	Label:13C(6)15N(2)@7		Q20170801-07	60.0647	248	0.0025	3	418	47712.3	HUMAN	Putative heat shock protein HSP 90-alpha A4
[4]		P08670	VIME_HUMAN	12	12.4	6.51	1.9e-11	719.863	2	335676	-0.74	STSR	SLYASSPGGVYATR	Label:13C(6)15N(4)@14		Q20170801-07	120.895	51	1.9e-11	1	466	53652.1	HUMAN	Vimentin
[4]		P08670	VIME_HUMAN	12	12.4	6.51	1.9e-11	803.413	2	135330	-0.57	KNTR	TNEKVELQELNDR	Label:13C(6)15N(2)@4;Label:13C(6)15N(4)@13		Q20170801-09	100.446	101	2e-11	2	466	53652.1	HUMAN	Vimentin
[4]		P08670	VIME_HUMAN	12	12.4	6.51	1.9e-11	718.874	2	696816	-0.36	TSRS	LYASSPGGVYATR	Label:13C(6)15N(4)@13	Abu@N-term	Q20170801-09	120.584	52	1.5e-10	1	466	53652.1	HUMAN	Vimentin
[4]		P08670	VIME_HUMAN	12	12.4	6.51	1.9e-11	580.8	2	311071	-0.38	RSLY	ASSPGGVYATR	Label:13C(6)15N(4)@11	Abu@N-term	Q20170801-07	60.6812	54	1.7e-08	1	466	53652.1	HUMAN	Vimentin
[4]		P08670	VIME_HUMAN	12	12.4	6.51	1.9e-11	505.939	3	3460000	-0.08	TSTR	TYSLGSALRPSTSR	Label:13C(6)15N(4)@9;Label:13C(6)15N(4)@14		Q20170801-09	116.209	37	2.5e-07	1	466	53652.1	HUMAN	Vimentin
[4]		P08670	VIME_HUMAN	12	12.4	6.51	1.9e-11	648.854	2	66374	-2.1	SLAD	AINTEFKNTR	Label:13C(6)15N(2)@7;Label:13C(6)15N(4)@10	Abu@N-term	Q20170801-09	74.1742	91	4.2e-07	1	466	53652.1	HUMAN	Vimentin
[4]		P08670	VIME_HUMAN	12	12.4	6.51	1.9e-11	662.332	2	46551	-0.0021	SRSL	YASSPGGVYATR	Label:13C(6)15N(4)@12	Abu@N-term	Q20170801-09	86.9486	53	4.6e-07	1	466	53652.1	HUMAN	Vimentin
[4]		P08670	VIME_HUMAN	12	12.4	6.51	1.9e-11	446.253	3	3010000	-0.094	TRTY	SLGSALRPSTSR	Label:13C(6)15N(4)@7;Label:13C(6)15N(4)@12	Abu@N-term	Q20170801-07	93.0855	39	1.8e-06	1	466	53652.1	HUMAN	Vimentin
[4]		P08670	VIME_HUMAN	12	12.4	6.51	1.9e-11	461.746	2	2040000	-1.8	SSRS	YVTTSTR	Label:13C(6)15N(4)@7	Abu@N-term	Q20170801-07	41.1537	30	2.6e-06	1	466	53652.1	HUMAN	Vimentin
[4]		P08670	VIME_HUMAN	12	12.4	6.51	1.9e-11	545.281	2	106184	-0.88	SLYA	SSPGGVYATR	Label:13C(6)15N(4)@10	Abu@N-term	Q20170801-09	58.1608	55	4.7e-06	1	466	53652.1	HUMAN	Vimentin
[4]		P08670	VIME_HUMAN	12	12.4	6.51	1.9e-11	762.388	2	136597	-3.1	STSR	SLYASSPGGVYATR	Label:13C(6)15N(4)@14	Abu@N-term	Q20170801-09	130.26	51	5e-06	1	466	53652.1	HUMAN	Vimentin
[4]		P08670	VIME_HUMAN	12	12.4	6.51	1.9e-11	500.608	3	1780000	1.2	STRT	YSLGSALRPSTSR	Label:13C(6)15N(4)@8;Label:13C(6)15N(4)@13	Abu@N-term	Q20170801-09	117.639	38	2.1e-05	1	466	53652.1	HUMAN	Vimentin
[5]		P11142	HSP7C_HUMAN	10	14.7	7.82	1.6e-14	567.917	3	394055	0.84	FEVK	STAGDTHLGGEDFDNR	Label:13C(6)15N(4)@16		Q20170801-09	86.5036	221	1.6e-14	2	646	70898.7	HUMAN	Heat shock cognate 71 kDa protein
[5]		P11142	HSP7C_HUMAN	10	14.7	7.82	1.6e-14	814.957	2	84877	-1.1	DSQR	QATKDAGTIAGLNVLR	Label:13C(6)15N(2)@4;Label:13C(6)15N(4)@16	Gln->pyro-Glu@1	Q20170801-09	170.172	156	5.2e-12	1	646	70898.7	HUMAN	Heat shock cognate 71 kDa protein
[5]		P11142	HSP7C_HUMAN	10	14.7	7.82	1.6e-14	749.358	2	90349	-0.24	QGNR	TTPSYVAFTDTER	Label:13C(6)15N(4)@13		Q20170801-09	136.9	37	6.9e-11	7	646	70898.7	HUMAN	Heat shock cognate 71 kDa protein
[5]		P11142	HSP7C_HUMAN	10	14.7	7.82	1.6e-14	725.372	3	171030	-3.8	QGNR	TTPSYVAFTDTERLIGDAAK	Label:13C(6)15N(2)@20;Label:13C(6)15N(4)@13		Q20170801-09	187.186	37	5.5e-10	5	646	70898.7	HUMAN	Heat shock cognate 71 kDa protein
[5]		P11142	HSP7C_HUMAN	10	14.7	7.82	1.6e-14	664.674	3	335414	0.37	YLGK	TVTNAVVTVPAYFNDSQR	Label:13C(6)15N(4)@18		Q20170801-09	173.828	138	3e-09	1	646	70898.7	HUMAN	Heat shock cognate 71 kDa protein
[5]		P11142	HSP7C_HUMAN	10	14.7	7.82	1.6e-14	603.794	2	29442	1.8	AVVT	VPAYFNDSQR	Label:13C(6)15N(4)@10		Q20170801-09	95.5013	146	7e-09	7	646	70898.7	HUMAN	Heat shock cognate 71 kDa protein
[5]		P11142	HSP7C_HUMAN	10	14.7	7.82	1.6e-14	605.345	2	202032	0.88	QATK	DAGTIAGLNVLR	Label:13C(6)15N(4)@12		Q20170801-09	169.76	160	1.1e-08	1	646	70898.7	HUMAN	Heat shock cognate 71 kDa protein
[5]		P11142	HSP7C_HUMAN	10	14.7	7.82	1.6e-14	619.821	2	98937	-1.1	QHGK	VEIIANDQGNR	Label:13C(6)15N(4)@11		Q20170801-09	73.5	26	1.3e-06	8	646	70898.7	HUMAN	Heat shock cognate 71 kDa protein
[5]		P11142	HSP7C_HUMAN	10	14.7	7.82	1.6e-14	549.317	3	608148	1.3	DSQR	QATKDAGTIAGLNVLR	Label:13C(6)15N(2)@4;Label:13C(6)15N(4)@16		Q20170801-09	144.364	156	2.7e-06	1	646	70898.7	HUMAN	Heat shock cognate 71 kDa protein
[5]		P11142	HSP7C_HUMAN	10	14.7	7.82	1.6e-14	557.957	3	234550	0.41	SDMK	HWPFMVVNDAGRPK	Label:13C(6)15N(2)@14;Label:13C(6)15N(4)@12		Q20170801-09	152.67	89	6.7e-05	1	646	70898.7	HUMAN	Heat shock cognate 71 kDa protein
[5-1]	5	P0DMV8	HS71A_HUMAN	9	16.5	5.51	6.9e-11	749.358	2	90349	-0.24	QGNR	TTPSYVAFTDTER	Label:13C(6)15N(4)@13		Q20170801-09	136.9	37	6.9e-11	7	641	70052.8	HUMAN	Heat shock 70 kDa protein 1A
[5-1]	5	P0DMV8	HS71A_HUMAN	9	16.5	5.51	6.9e-11	725.372	3	171030	-3.8	QGNR	TTPSYVAFTDTERLIGDAAK	Label:13C(6)15N(2)@20;Label:13C(6)15N(4)@13		Q20170801-09	187.186	37	5.5e-10	5	641	70052.8	HUMAN	Heat shock 70 kDa protein 1A
[5-1]	5	P0DMV8	HS71A_HUMAN	9	16.5	5.51	6.9e-11	566.297	3	262876	-0.87	SDMK	HWPFQVINDGDKPK	Label:13C(6)15N(2)@12;Label:13C(6)15N(2)@14		Q20170801-09	144.724	89	4.4e-09	2	641	70052.8	HUMAN	Heat shock 70 kDa protein 1A
[5-1]	5	P0DMV8	HS71A_HUMAN	9	16.5	5.51	6.9e-11	603.794	2	29442	1.8	AVIT	VPAYFNDSQR	Label:13C(6)15N(4)@10		Q20170801-09	95.5013	146	7e-09	7	641	70052.8	HUMAN	Heat shock 70 kDa protein 1A
[5-1]	5	P0DMV8	HS71A_HUMAN	9	16.5	5.51	6.9e-11	813.968	2	234749	0.29	DSQR	QATKDAGVIAGLNVLR	Label:13C(6)15N(2)@4;Label:13C(6)15N(4)@16	Gln->pyro-Glu@1	Q20170801-09	181.584	156	1.6e-08	3	641	70052.8	HUMAN	Heat shock 70 kDa protein 1A
[5-1]	5	P0DMV8	HS71A_HUMAN	9	16.5	5.51	6.9e-11	849.456	2	78223	-2.4	NVLR	IINEPTAAAIAYGLDR	Label:13C(6)15N(4)@16		Q20170801-09	179.478	172	1.2e-07	3	641	70052.8	HUMAN	Heat shock 70 kDa protein 1A
[5-1]	5	P0DMV8	HS71A_HUMAN	9	16.5	5.51	6.9e-11	648.312	2	345373	-1.5	VSAK	NALESYAFNMK	Label:13C(6)15N(2)@11		Q20170801-09	159.819	540	1.3e-06	3	641	70052.8	HUMAN	Heat shock 70 kDa protein 1A
[5-1]	5	P0DMV8	HS71A_HUMAN	9	16.5	5.51	6.9e-11	619.821	2	98937	-1.1	QHGK	VEIIANDQGNR	Label:13C(6)15N(4)@11		Q20170801-09	73.5	26	1.3e-06	8	641	70052.8	HUMAN	Heat shock 70 kDa protein 1A
[5-1]	5	P0DMV8	HS71A_HUMAN	9	16.5	5.51	6.9e-11	455.753	2	157304	1.5	DLFR	STLEPVEK	Label:13C(6)15N(2)@8		Q20170801-09	50.528	312	0.004	4	641	70052.8	HUMAN	Heat shock 70 kDa protein 1A
[5-2]	5	P0DMV9	HS71B_HUMAN	9	16.5	5.51	6.9e-11	749.358	2	90349	-0.24	QGNR	TTPSYVAFTDTER	Label:13C(6)15N(4)@13		Q20170801-09	136.9	37	6.9e-11	7	641	70052.8	HUMAN	Heat shock 70 kDa protein 1B
[5-2]	5	P0DMV9	HS71B_HUMAN	9	16.5	5.51	6.9e-11	725.372	3	171030	-3.8	QGNR	TTPSYVAFTDTERLIGDAAK	Label:13C(6)15N(2)@20;Label:13C(6)15N(4)@13		Q20170801-09	187.186	37	5.5e-10	5	641	70052.8	HUMAN	Heat shock 70 kDa protein 1B
[5-2]	5	P0DMV9	HS71B_HUMAN	9	16.5	5.51	6.9e-11	566.297	3	262876	-0.87	SDMK	HWPFQVINDGDKPK	Label:13C(6)15N(2)@12;Label:13C(6)15N(2)@14		Q20170801-09	144.724	89	4.4e-09	2	641	70052.8	HUMAN	Heat shock 70 kDa protein 1B
[5-2]	5	P0DMV9	HS71B_HUMAN	9	16.5	5.51	6.9e-11	603.794	2	29442	1.8	AVIT	VPAYFNDSQR	Label:13C(6)15N(4)@10		Q20170801-09	95.5013	146	7e-09	7	641	70052.8	HUMAN	Heat shock 70 kDa protein 1B
[5-2]	5	P0DMV9	HS71B_HUMAN	9	16.5	5.51	6.9e-11	813.968	2	234749	0.29	DSQR	QATKDAGVIAGLNVLR	Label:13C(6)15N(2)@4;Label:13C(6)15N(4)@16	Gln->pyro-Glu@1	Q20170801-09	181.584	156	1.6e-08	3	641	70052.8	HUMAN	Heat shock 70 kDa protein 1B
[5-2]	5	P0DMV9	HS71B_HUMAN	9	16.5	5.51	6.9e-11	849.456	2	78223	-2.4	NVLR	IINEPTAAAIAYGLDR	Label:13C(6)15N(4)@16		Q20170801-09	179.478	172	1.2e-07	3	641	70052.8	HUMAN	Heat shock 70 kDa protein 1B
[5-2]	5	P0DMV9	HS71B_HUMAN	9	16.5	5.51	6.9e-11	648.312	2	345373	-1.5	VSAK	NALESYAFNMK	Label:13C(6)15N(2)@11		Q20170801-09	159.819	540	1.3e-06	3	641	70052.8	HUMAN	Heat shock 70 kDa protein 1B
[5-2]	5	P0DMV9	HS71B_HUMAN	9	16.5	5.51	6.9e-11	619.821	2	98937	-1.1	QHGK	VEIIANDQGNR	Label:13C(6)15N(4)@11		Q20170801-09	73.5	26	1.3e-06	8	641	70052.8	HUMAN	Heat shock 70 kDa protein 1B
[5-2]	5	P0DMV9	HS71B_HUMAN	9	16.5	5.51	6.9e-11	455.753	2	157304	1.5	DLFR	STLEPVEK	Label:13C(6)15N(2)@8		Q20170801-09	50.528	312	0.004	4	641	70052.8	HUMAN	Heat shock 70 kDa protein 1B
[5-3]	2	P34931	HS71L_HUMAN	6	10.6	5.51	6.9e-11	749.358	2	90349	-0.24	QGNR	TTPSYVAFTDTER	Label:13C(6)15N(4)@13		Q20170801-09	136.9	39	6.9e-11	7	641	70375.6	HUMAN	Heat shock 70 kDa protein 1-like
[5-3]	2	P34931	HS71L_HUMAN	6	10.6	5.51	6.9e-11	725.372	3	171030	-3.8	QGNR	TTPSYVAFTDTERLIGDAAK	Label:13C(6)15N(2)@20;Label:13C(6)15N(4)@13		Q20170801-09	187.186	39	5.5e-10	5	641	70375.6	HUMAN	Heat shock 70 kDa protein 1-like
[5-3]	2	P34931	HS71L_HUMAN	6	10.6	5.51	6.9e-11	603.794	2	29442	1.8	AVIT	VPAYFNDSQR	Label:13C(6)15N(4)@10		Q20170801-09	95.5013	148	7e-09	7	641	70375.6	HUMAN	Heat shock 70 kDa protein 1-like
[5-3]	2	P34931	HS71L_HUMAN	6	10.6	5.51	6.9e-11	813.968	2	234749	0.29	DSQR	QATKDAGVIAGLNVLR	Label:13C(6)15N(2)@4;Label:13C(6)15N(4)@16	Gln->pyro-Glu@1	Q20170801-09	181.584	158	1.6e-08	3	641	70375.6	HUMAN	Heat shock 70 kDa protein 1-like
[5-3]	2	P34931	HS71L_HUMAN	6	10.6	5.51	6.9e-11	648.312	2	345373	-1.5	IAAK	NALESYAFNMK	Label:13C(6)15N(2)@11		Q20170801-09	159.819	542	1.3e-06	3	641	70375.6	HUMAN	Heat shock 70 kDa protein 1-like
[5-3]	2	P34931	HS71L_HUMAN	6	10.6	5.51	6.9e-11	619.821	2	98937	-1.1	QHGK	VEIIANDQGNR	Label:13C(6)15N(4)@11		Q20170801-09	73.5	28	1.3e-06	8	641	70375.6	HUMAN	Heat shock 70 kDa protein 1-like
[5-4]	3	P11021	GRP78_HUMAN	4	8	6.27	5.2e-11	772.91	2	276871	0.11	GQTK	TFAPEEISAMVLTK	Label:13C(6)15N(2)@14		Q20170801-09	191.775	139	5.2e-11	1	654	72333.5	HUMAN	78 kDa glucose-regulated protein
[5-4]	3	P11021	GRP78_HUMAN	4	8	6.27	5.2e-11	719.852	2	242957	-5.9	LIGR	TWNDPSVQQDIK	Label:13C(6)15N(2)@12		Q20170801-07	122.604	102	1.7e-09	1	654	72333.5	HUMAN	78 kDa glucose-regulated protein
[5-4]	3	P11021	GRP78_HUMAN	4	8	6.27	5.2e-11	619.821	2	98937	-1.1	KNGR	VEIIANDQGNR	Label:13C(6)15N(4)@11		Q20170801-09	73.5	50	1.3e-06	8	654	72333.5	HUMAN	78 kDa glucose-regulated protein
[5-4]	3	P11021	GRP78_HUMAN	4	8	6.27	5.2e-11	540.969	3	235983	0.59	VEKK	TKPYIQVDIGGGQTK	Label:13C(6)15N(2)@2;Label:13C(6)15N(2)@15		Q20170801-09	119.03	124	1.6e-06	1	654	72333.5	HUMAN	78 kDa glucose-regulated protein
[5-5]	2	P17066	HSP76_HUMAN	5	9	5.3	6.9e-11	749.358	2	90349	-0.24	QGNR	TTPSYVAFTDTER	Label:13C(6)15N(4)@13		Q20170801-09	136.9	39	6.9e-11	7	643	71028.7	HUMAN	Heat shock 70 kDa protein 6
[5-5]	2	P17066	HSP76_HUMAN	5	9	5.3	6.9e-11	603.794	2	29442	1.8	AVIT	VPAYFNDSQR	Label:13C(6)15N(4)@10		Q20170801-09	95.5013	148	7e-09	7	643	71028.7	HUMAN	Heat shock 70 kDa protein 6
[5-5]	2	P17066	HSP76_HUMAN	5	9	5.3	6.9e-11	849.456	2	78223	-2.4	NVLR	IINEPTAAAIAYGLDR	Label:13C(6)15N(4)@16		Q20170801-09	179.478	174	1.2e-07	3	643	71028.7	HUMAN	Heat shock 70 kDa protein 6
[5-5]	2	P17066	HSP76_HUMAN	5	9	5.3	6.9e-11	619.821	2	98937	-1.1	QQGR	VEILANDQGNR	Label:13C(6)15N(4)@11		Q20170801-09	73.5	28	1.3e-06	8	643	71028.7	HUMAN	Heat shock 70 kDa protein 6
[5-5]	2	P17066	HSP76_HUMAN	5	9	5.3	6.9e-11	455.753	2	157304	1.5	DLFR	STLEPVEK	Label:13C(6)15N(2)@8		Q20170801-09	50.528	314	0.004	4	643	71028.7	HUMAN	Heat shock 70 kDa protein 6
[5-6]	2	P38646	GRP75_HUMAN	3	5.6	5.5	9.3e-10	730.866	2	823010	-0.46	EGAR	TTPSVVAFTADGER	Label:13C(6)15N(4)@14		Q20170801-09	139.499	86	9.3e-10	1	679	73681.1	HUMAN	Stress-70 protein, mitochondrial
[5-6]	2	P38646	GRP75_HUMAN	3	5.6	5.5	9.3e-10	603.794	2	29442	1.8	AVIT	VPAYFNDSQR	Label:13C(6)15N(4)@10		Q20170801-09	95.5013	193	7e-09	7	679	73681.1	HUMAN	Stress-70 protein, mitochondrial
[5-6]	2	P38646	GRP75_HUMAN	3	5.6	5.5	9.3e-10	728.889	2	148178	-0.16	EVSK	SDIGEVILVGGMTR	Label:13C(6)15N(4)@14		Q20170801-09	182.546	378	2.1e-08	1	679	73681.1	HUMAN	Stress-70 protein, mitochondrial
[5-7]	1	P48741	HSP77_HUMAN	3	8.7	5.3	6.9e-11	749.358	2	90349	-0.24	QGNR	TTPSYVAFTDTER	Label:13C(6)15N(4)@13		Q20170801-09	136.9	39	6.9e-11	7	367	40244.8	HUMAN	Putative heat shock 70 kDa protein 7
[5-7]	1	P48741	HSP77_HUMAN	3	8.7	5.3	6.9e-11	619.821	2	98937	-1.1	QQGR	VEILANDQGNR	Label:13C(6)15N(4)@11		Q20170801-09	73.5	28	1.3e-06	8	367	40244.8	HUMAN	Putative heat shock 70 kDa protein 7
[5-7]	1	P48741	HSP77_HUMAN	3	8.7	5.3	6.9e-11	455.753	2	157304	1.5	DLFR	STLEPVEK	Label:13C(6)15N(2)@8		Q20170801-09	50.528	314	0.004	4	367	40244.8	HUMAN	Putative heat shock 70 kDa protein 7
[6]		P12956	XRCC6_HUMAN	8	12.6	10.24	2.4e-18	637.631	3	157826	0.4	SHKR	IMLFTNEDNPHGNDSAK	Label:13C(6)15N(2)@17		Q20170801-07	124.063	166	2.4e-18	1	609	69843.7	HUMAN	X-ray repair cross-complementing protein 6
[6]		P12956	XRCC6_HUMAN	8	12.6	10.24	2.4e-18	913.493	2	114675	0.55	TKTR	TFNTSTGGLLLPSDTKR	Label:13C(6)15N(2)@16;Label:13C(6)15N(4)@17		Q20170801-09	148.204	302	5.6e-13	1	609	69843.7	HUMAN	X-ray repair cross-complementing protein 6
[6]		P12956	XRCC6_HUMAN	8	12.6	10.24	2.4e-18	830.437	2	246578	-0.61	TKTR	TFNTSTGGLLLPSDTK	Label:13C(6)15N(2)@16		Q20170801-09	164.32	302	1.1e-11	1	609	69843.7	HUMAN	X-ray repair cross-complementing protein 6
[6]		P12956	XRCC6_HUMAN	8	12.6	10.24	2.4e-18	559.52	4	379289	-0.065	SHKR	IMLFTNEDNPHGNDSAKASR	Label:13C(6)15N(2)@17;Label:13C(6)15N(4)@20		Q20170801-09	109.42	166	1.7e-11	1	609	69843.7	HUMAN	X-ray repair cross-complementing protein 6
[6]		P12956	XRCC6_HUMAN	8	12.6	10.24	2.4e-18	571.946	3	741029	0.98	FTYR	SDSFENPVLQQHFR	Label:13C(6)15N(4)@14		Q20170801-09	149.155	475	9.8e-11	1	609	69843.7	HUMAN	X-ray repair cross-complementing protein 6
[6]		P12956	XRCC6_HUMAN	8	12.6	10.24	2.4e-18	541.294	2	194431	-0.065	FTEK	IMATPEQVGK	Label:13C(6)15N(2)@10		Q20170801-09	78.5202	452	1.8e-07	1	609	69843.7	HUMAN	X-ray repair cross-complementing protein 6
[6]		P12956	XRCC6_HUMAN	8	12.6	10.24	2.4e-18	698.382	3	172521	-0.98	VKTK	TRTFNTSTGGLLLPSDTKR	Label:13C(6)15N(2)@18;Label:13C(6)15N(4)@2;Label:13C(6)15N(4)@19		Q20170801-09	133.548	300	2.7e-05	1	609	69843.7	HUMAN	X-ray repair cross-complementing protein 6
[6]		P12956	XRCC6_HUMAN	8	12.6	10.24	2.4e-18	527.993	3	181664	0.33	YGLK	SGLKKQELLEALTK	Label:13C(6)15N(2)@4;Label:13C(6)15N(2)@5;Label:13C(6)15N(2)@14		Q20170801-09	137.374	592	0.00027	1	609	69843.7	HUMAN	X-ray repair cross-complementing protein 6
[7]		Q5QNW6	H2B2F_HUMAN	11	72.2	5.63	3.6e-10	445.515	4	681752	1.5	TAVR	LLLPGELAKHAVSEGTK	Label:13C(6)15N(2)@9;Label:13C(6)15N(2)@17		Q20170801-09	151.039	101	3.6e-10	15	126	13920.3	HUMAN	Histone H2B type 2-F
[7]		Q5QNW6	H2B2F_HUMAN	11	72.2	5.63	3.6e-10	494.611	3	1480000	0.91	YNKR	STITSREIQTAVR	Label:13C(6)15N(4)@6;Label:13C(6)15N(4)@13		Q20170801-09	96.9488	88	1e-09	13	126	13920.3	HUMAN	Histone H2B type 2-F
[7]		Q5QNW6	H2B2F_HUMAN	11	72.2	5.63	3.6e-10	762.938	2	33971	-1.2	YVYK	VLKQVHPDTGISSK	Label:13C(6)15N(2)@3;Label:13C(6)15N(2)@14		Q20170801-07	65.4255	45	1.4e-09	15	126	13920.3	HUMAN	Histone H2B type 2-F
[7]		Q5QNW6	H2B2F_HUMAN	11	72.2	5.63	3.6e-10	365.544	3	276025	-0.54	-	MPDPAKSAPAPK	Label:13C(6)15N(2)@6;Label:13C(6)15N(2)@12	Met-loss@1	Q20170801-09	24.7093	1	1.6e-08	3	126	13920.3	HUMAN	Histone H2B type 2-F
[7]		Q5QNW6	H2B2F_HUMAN	11	72.2	5.63	3.6e-10	415.236	3	118050	-2.2	ELAK	HAVSEGTKAVTK	Label:13C(6)15N(2)@8;Label:13C(6)15N(2)@12		Q20170801-09	15.8744	110	3.2e-08	15	126	13920.3	HUMAN	Histone H2B type 2-F
[7]		Q5QNW6	H2B2F_HUMAN	11	72.2	5.63	3.6e-10	606.665	3	158963	-0.58	ELAK	HAVSEGTKAVTKYTSSK	Label:13C(6)15N(2)@8;Label:13C(6)15N(2)@12;Label:13C(6)15N(2)@17		Q20170801-07	65.8828	110	5.8e-08	12	126	13920.3	HUMAN	Histone H2B type 2-F
[7]		Q5QNW6	H2B2F_HUMAN	11	72.2	5.63	3.6e-10	512.275	3	240021	-0.19	KRKR	SRKESYSVYVYK	Label:13C(6)15N(2)@3;Label:13C(6)15N(2)@12;Label:13C(6)15N(4)@2		Q20170801-07	89.617	33	3.5e-07	9	126	13920.3	HUMAN	Histone H2B type 2-F
[7]		Q5QNW6	H2B2F_HUMAN	11	72.2	5.63	3.6e-10	392.874	3	246175	-1.2	KVLK	QVHPDTGISSK	Label:13C(6)15N(2)@11		Q20170801-07	33.4913	48	1.1e-06	15	126	13920.3	HUMAN	Histone H2B type 2-F
[7]		Q5QNW6	H2B2F_HUMAN	11	72.2	5.63	3.6e-10	641.338	2	216606	-1.2	KRSR	KESYSVYVYK	Label:13C(6)15N(2)@1;Label:13C(6)15N(2)@10		Q20170801-09	97.9009	35	3.1e-06	9	126	13920.3	HUMAN	Histone H2B type 2-F
[7]		Q5QNW6	H2B2F_HUMAN	11	72.2	5.63	3.6e-10	404.228	4	125134	2.1	IFER	IAGEASRLAHYNKR	Label:13C(6)15N(2)@13;Label:13C(6)15N(4)@7;Label:13C(6)15N(4)@14		Q20170801-09	65.3556	74	0.00016	13	126	13920.3	HUMAN	Histone H2B type 2-F
[7]		Q5QNW6	H2B2F_HUMAN	11	72.2	5.63	3.6e-10	394.473	4	104929	-3.9	EASR	LAHYNKRSTITSR	Label:13C(6)15N(2)@6;Label:13C(6)15N(4)@7;Label:13C(6)15N(4)@13		Q20170801-07	42.1989	81	0.004	15	126	13920.3	HUMAN	Histone H2B type 2-F
[7-1]	2	O60814	H2B1K_HUMAN	11	72.2	5.63	3.6e-10	445.515	4	681752	1.5	TAVR	LLLPGELAKHAVSEGTK	Label:13C(6)15N(2)@9;Label:13C(6)15N(2)@17		Q20170801-09	151.039	101	3.6e-10	15	126	13890.3	HUMAN	Histone H2B type 1-K
[7-1]	2	O60814	H2B1K_HUMAN	11	72.2	5.63	3.6e-10	494.611	3	1480000	0.91	YNKR	STITSREIQTAVR	Label:13C(6)15N(4)@6;Label:13C(6)15N(4)@13		Q20170801-09	96.9488	88	1e-09	13	126	13890.3	HUMAN	Histone H2B type 1-K
[7-1]	2	O60814	H2B1K_HUMAN	11	72.2	5.63	3.6e-10	762.938	2	33971	-1.2	YVYK	VLKQVHPDTGISSK	Label:13C(6)15N(2)@3;Label:13C(6)15N(2)@14		Q20170801-07	65.4255	45	1.4e-09	15	126	13890.3	HUMAN	Histone H2B type 1-K
[7-1]	2	O60814	H2B1K_HUMAN	11	72.2	5.63	3.6e-10	451.252	4	243039	0.047	ELAK	HAVSEGTKAVTKYTSAK	Label:13C(6)15N(2)@8;Label:13C(6)15N(2)@12;Label:13C(6)15N(2)@17		Q20170801-07	68.9872	110	1.3e-08	3	126	13890.3	HUMAN	Histone H2B type 1-K
[7-1]	2	O60814	H2B1K_HUMAN	11	72.2	5.63	3.6e-10	415.236	3	118050	-2.2	ELAK	HAVSEGTKAVTK	Label:13C(6)15N(2)@8;Label:13C(6)15N(2)@12		Q20170801-09	15.8744	110	3.2e-08	15	126	13890.3	HUMAN	Histone H2B type 1-K
[truncated: 749 more rows]

## Sheet: Control-N-termini-abu.txt
Acc number	Uniprot ID	Intensity	P4'-P1	Peptide sequence	Start site	Protein name
P51398	RT29_HUMAN	140551	QARQ	SIAAHLDNQVPVESPR	31	28S ribosomal protein S29, mitochondrial
[truncated: 66 more rows]

## Sheet: Control-substrates-abu.txt
Uniprot	Protein name
[truncated: 61 more rows]

## Sheet: Stats
	------ LIGHT -----
[truncated: 31 more rows]
